# Supplementary material for: Super-enhancers reorganization controls re-sensitization of oxaliplatin-resistant FBXW7-mutated colorectal cancer
Source: Research Square preprint supplement (doi:10.21203/rs.3.rs-4758082/v1), 2024-07-30
Supplement: Supplementary file 1 [file 006f3042f904ef749aca549b.xlsx]

## Sheet: lost_after_hdac4_silencing c2
chromosome	start	end
chr1	8017790	8019594
chr1	8019594	8024732
chr1	8024732	8040158
chr1	8040158	8049172
chr1	8049172	8049174
chr1	8069806	8099433
chr1	8099433	8099660
chr1	8118210	8137712
chr1	8154023	8213530
chr1	8230443	8238988
chr1	16140339	16147176
chr1	16147176	16182292
chr1	16182292	16182881
chr1	16896312	16906073
chr1	23554311	23558235
chr1	27541176	27543527
chr1	33429072	33429218
chr1	33429218	33442965
chr1	33442965	33443789
chr1	39393949	39399555
chr1	66253693	66273526
chr1	66291541	66291976
chr1	66291976	66354928
chr1	66354928	66359657
chr1	68377858	68390759
chr1	84145461	84179227
chr1	84247977	84254884
chr1	94299713	94327488
chr1	153566838	153572528
chr1	156117185	156122210
chr1	156122210	156130164
chr1	156130164	156130839
chr1	168405198	168410189
chr1	172869911	172919564
chr1	172919564	172920042
chr1	202017362	202033961
chr1	202055055	202055595
chr1	202055595	202063899
chr1	202063899	202086087
chr1	214428235	214440190
chr1	234604789	234613722
chr10	11684255	11687269
chr10	11876390	11882823
chr10	28105903	28126011
chr10	28126011	28140517
chr10	28177844	28182247
chr10	31929068	31948403
chr10	70559633	70581413
chr10	70581413	70584976
chr10	80497594	80505551
chr10	90086727	90090212
chr10	93377328	93385005
chr10	93422377	93442761
chr10	93442761	93459211
chr10	93459211	93480362
chr10	93480362	93480439
chr10	99776343	99786640
chr10	99963755	99978874
chr10	100003146	100007812
chr10	100362778	100371316
chr10	103891872	103911088
chr10	104109682	104121670
chr10	110396210	110409955
chr10	110409955	110413994
chr10	110413994	110416023
chr10	112329680	112334451
chr10	112360372	112363436
chr10	112378320	112406187
chr10	112475257	112550341
chr10	113070866	113087219
chr11	10526892	10529907
chr11	10647096	10669577
chr11	10669577	10670684
chr11	27933575	27935539
chr11	34598950	34602585
chr11	35007426	35011517
chr11	35163572	35168018
chr11	57777743	57782504
chr11	62544091	62559280
chr11	64841882	64855685
chr11	65491215	65494850
chr11	65494850	65500549
chr11	65912353	65917213
chr11	74134790	74139312
chr11	102114720	102120105
chr11	108884805	108907801
chr11	108907801	108908128
chr11	109857169	109865259
chr11	118912646	118913652
chr11	118913652	118927929
chr11	118927929	118930278
chr11	122131822	122201680
chr12	6279590	6281601
chr12	6363058	6372505
chr12	10715887	10720218
chr12	12835724	12841080
chr12	12870928	12883186
chr12	13557251	13583280
chr12	13725480	13734442
chr12	15688673	15702667
chr12	27615395	27624762
chr12	46429726	46453149
chr12	46453149	46454190
chr12	46470472	46474835
chr12	46548572	46557477
chr12	49488913	49504096
chr12	49504096	49519047
chr12	52144675	52153339
chr12	53364984	53366125
chr12	53366125	53374103
chr12	65307402	65315101
chr12	65493734	65511328
chr12	65531714	65531798
chr12	65531798	65539177
chr12	65630011	65661243
chr12	65720744	65729987
chr12	65818377	65835620
chr12	65835620	65837650
chr12	74399874	74404199
chr12	75622283	75669510
chr12	75690243	75738417
chr12	75745660	75758361
chr12	75758361	75768228
chr12	75768228	75768365
chr12	75877256	75878040
chr12	75878040	75901198
chr12	75942097	75943509
chr12	75943509	75959651
chr12	75977123	75987130
chr12	76017691	76029729
chr12	78879467	78887697
chr12	78914122	78916874
chr12	88549046	88579685
chr12	88918550	88969007
chr12	88969007	88970212
chr12	98399022	98404512
chr12	108839113	108853915
chr12	116494965	116529974
chr12	124917819	124939236
chr13	22787419	22795320
chr13	44231447	44243005
chr13	44301347	44302719
chr13	44302719	44314661
chr13	44314661	44314877
chr13	73088867	73091766
chr13	73420946	73429806
chr13	97255195	97258970
chr13	97258970	97259880
chr13	109263955	109270508
chr14	53840074	53855984
chr14	55101998	55107948
chr14	67976486	67979475
chr14	68247981	68254450
chr14	68458354	68465673
chr14	68545715	68548349
chr14	68779389	68791438
chr14	76946413	76957037
chr14	76957037	76962576
chr15	44157142	44159835
chr15	51863363	51876328
chr15	59273583	59299332
chr15	60371971	60379022
chr15	92800585	92801570
chr15	92801570	92832975
chr15	96265315	96274662
chr15	100712497	100728822
chr16	1082410	1091275
chr16	11494904	11498772
chr16	15481888	15481904
chr16	15481904	15489567
chr16	15489567	15495227
chr16	20903223	20912388
chr16	68920595	68930402
chr16	68991635	68995255
chr16	69062990	69078360
chr16	69393489	69393593
chr16	69393593	69419054
chr16	69419054	69420128
chr16	69528934	69534209
chr16	74577318	74580914
chr16	89315494	89317251
chr16	89317251	89331360
chr16	89331360	89334499
chr17	931916	935000
chr17	15947063	15966282
chr17	15966282	15966818
chr17	17011267	17014249
chr17	17014249	17015784
chr17	40516378	40521714
chr17	40902468	40904269
chr17	40904269	40918274
chr17	40918274	40922428
chr17	40948596	40960211
chr17	44819003	44821515
chr17	47501867	47514081
chr17	50050311	50064373
chr17	50949270	50954822
chr17	57293803	57296907
chr17	57371025	57376728
chr17	57867631	57891218
chr17	57927570	57941094
chr17	57941094	57950134
chr17	57950134	57952385
chr17	58364917	58415409
chr17	58415409	58417497
chr17	59753198	59753759
chr17	59753759	59763369
chr17	59763369	59781255
chr17	59781255	59788184
chr17	59788184	59789328
chr17	59827577	59847791
chr17	61555758	61576638
chr17	64650835	64653975
chr17	64653975	64715077
chr17	64715077	64733252
chr17	68377550	68385186
chr17	68385186	68386942
chr17	72385862	72390587
chr17	72406525	72408831
chr17	72603275	72623554
chr17	72657081	72663150
chr17	72715665	72717448
chr17	73291799	73309351
chr17	75683130	75707955
chr17	78313914	78329423
chr18	3594475	3595863
chr18	3595863	3629232
chr18	3629232	3631252
chr18	3648002	3648570
chr18	3648570	3666617
chr18	3666617	3667562
chr18	31230902	31245842
chr18	70356954	70377718
chr19	1745199	1749617
chr19	13163426	13168391
chr19	13168391	13173088
chr19	13839114	13861846
chr19	15825434	15831262
chr19	15831262	15838429
chr19	18364267	18365366
chr19	18365366	18379373
chr19	38681919	38684695
chr19	38684695	38691397
chr19	38691397	38693480
chr19	39074091	39078526
chr19	43757695	43784323
chr19	43784323	43785262
chr2	10282872	10287869
chr2	62568941	62581132
chr2	62774217	62791512
chr2	64830924	64839945
chr2	97867448	97872038
chr2	101114443	101126483
chr2	109607203	109609557
chr2	110096158	110102244
chr2	110102244	110116851
chr2	156334933	156335008
chr2	156335008	156341406
chr2	156341406	156343359
chr2	157030682	157033113
chr2	161122237	161130036
chr2	168194461	168196346
chr2	168196346	168205166
chr2	168205166	168217991
chr2	172246469	172252670
chr2	172252670	172255074
chr2	174119062	174124032
chr2	177165814	177170932
chr2	179236784	179241546
chr2	181764911	181817527
chr2	181875681	181906441
chr2	181946273	181959500
chr2	187542076	187548023
chr2	190606031	190610048
chr2	219684548	219687203
chr2	219687203	219706336
chr2	223521666	223564826
chr2	223690922	223693711
chr2	223693711	223700964
chr2	223700964	223701358
chr2	226047576	226066032
chr2	226066032	226066772
chr2	226113312	226113489
chr2	226113489	226138029
chr2	226152062	226160828
chr2	226160828	226163285
chr2	226173701	226192613
chr2	226206887	226216639
chr2	226644671	226675857
chr2	226675857	226681679
chr2	226753995	226773497
chr2	230776006	230795133
chr2	231640272	231644148
chr2	231663603	231664148
chr2	231664148	231674666
chr2	231674666	231681857
chr20	10538956	10542760
chr20	31559753	31570600
chr20	31694674	31718411
chr20	35304932	35311449
chr20	38777792	38781764
chr20	41003582	41009865
chr20	45778509	45782774
chr20	50722135	50745146
chr20	51739822	51750504
chr20	51750504	51761152
chr20	53610384	53610978
chr20	53610978	53624331
chr20	53624331	53624360
chr20	54122504	54122823
chr20	54122823	54132650
chr20	62733086	62733761
chr20	62733761	62741935
chr21	8229486	8234652
chr21	8411435	8420619
chr21	31351666	31368390
chr22	24190094	24201093
chr22	24201093	24210130
chr22	24210130	24210645
chr22	28976082	28979313
chr22	30195536	30226830
chr22	30250081	30258806
chr22	37307376	37317272
chr22	37317272	37331753
chr22	37748007	37752427
chr22	37776794	37785787
chr22	46066614	46082673
chr3	4986392	4997000
chr3	7873718	7879971
chr3	27533255	27536030
chr3	30596645	30611821
chr3	45120756	45123534
chr3	45123534	45136345
chr3	45136345	45139596
chr3	65951521	65965645
chr3	98535026	98591015
chr3	98891956	98904688
chr3	98904688	98906269
chr3	98954055	98986951
chr3	104439756	104446410
chr3	109805962	109809190
chr3	109924615	109928013
chr3	110413575	110420262
chr3	110566799	110586090
chr3	110772174	110775731
chr3	111850969	111864818
chr3	111889567	111902058
chr3	111902058	111967754
chr3	114643602	114652832
chr3	129655640	129656149
chr3	129656149	129663933
chr3	129663933	129664773
chr3	139297991	139298224
chr3	139298224	139326760
chr3	149574264	149583600
chr3	152018901	152026942
chr3	171253931	171263810
chr3	177344863	177345195
chr3	177345195	177359688
chr3	185786654	185798051
chr4	11497795	11498142
chr4	11498142	11515985
chr4	11542497	11543028
chr4	11543028	11550173
chr4	11550173	11550668
chr4	11611241	11612682
chr4	11612682	11654847
chr4	11696610	11700185
chr4	26567692	26570358
chr4	30731006	30879310
chr4	30900887	30901161
chr4	30901161	30960676
chr4	30960676	30965814
chr4	31013197	31069395
chr4	31069395	31070992
chr4	31083863	31085655
chr4	31085655	31090675
chr4	31090675	31091772
chr4	31233828	31238915
chr4	40251761	40254709
chr4	41144532	41144565
chr4	41144565	41160013
chr4	41160013	41162066
chr4	49709344	49711889
chr4	74361300	74376748
chr4	74415023	74418346
chr4	74536176	74545253
chr4	74619129	74670956
chr4	74670956	74670969
chr4	78554043	78568395
chr4	97493117	97496663
chr4	101009470	101042650
chr4	101101038	101166479
chr4	101166479	101168859
chr4	101350101	101357747
chr4	168095176	168100012
chr4	168485641	168490424
chr4	168530881	168570932
chr4	168570932	168575650
chr4	186726129	186736782
chr4	186736782	186737128
chr4	186804812	186846717
chr4	186846717	186847427
chr4	186920313	186938033
chr5	49610066	49610082
chr5	49610082	49644207
chr5	57364208	57368456
chr5	57823547	57836295
chr5	91266414	91283702
chr5	92551236	92563194
chr5	93151319	93165447
chr5	113163052	113168048
chr5	141001028	141004913
chr5	142352841	142366213
chr5	149439562	149446489
chr5	157602198	157608746
chr6	6809813	6827100
chr6	20999706	21005779
chr6	21021980	21023975
chr6	30747711	30748768
chr6	30748768	30785293
chr6	30810277	30810663
chr6	30810663	30822528
chr6	56651070	56663362
chr6	56708628	56710929
chr6	56710929	56732405
chr6	56732405	56733205
chr6	56746670	56754787
chr6	63515678	63530192
chr6	73578813	73586361
chr6	73702958	73713783
chr6	111984889	111987386
chr6	119169960	119174426
chr6	119244861	119254621
chr6	119254621	119262685
chr6	119309803	119317698
chr6	122694675	122696804
chr6	129179655	129186046
chr6	129489223	129489537
chr6	129489537	129502794
chr6	129502794	129502954
chr6	129641897	129648846
chr6	129663696	129672380
chr6	129672380	129683351
chr6	129683351	129685042
chr6	129744314	129751877
chr6	133094683	133099514
chr6	142006757	142015442
chr6	144896108	144901191
chr6	144921826	144927708
chr6	151013524	151081751
chr6	151081751	151082015
chr6	151119698	151127190
chr6	158698709	158706219
chr6	158706219	158739435
chr6	158848573	158849529
chr6	158849529	158867454
chr7	20340427	20352757
chr7	23335113	23346843
chr7	23346843	23354054
chr7	23354054	23358630
chr7	24821083	24826881
chr7	32659376	32670271
chr7	73798849	73802114
chr7	80271654	80281346
chr7	84041409	84043872
chr7	106773870	106776352
chr7	116441515	116462530
chr7	116686312	116708901
chr7	116708901	116715885
chr7	116770482	116771087
chr7	116771087	116778467
chr7	121297419	121304854
chr7	121529131	121547518
chr7	129844506	129855301
chr7	129949785	129958563
chr7	130839137	130846476
chr7	130846476	130853583
chr7	130853583	130854927
chr7	130882025	130919239
chr7	130940013	130962111
chr7	130987155	131014447
chr8	6548123	6561004
chr8	6592708	6604743
chr8	8289505	8298015
chr8	9005781	9014958
chr8	9014958	9016013
chr8	16825616	16838316
chr8	17795218	17804259
chr8	17837028	17837031
chr8	17837031	17857359
chr8	28623482	28632061
chr8	29664718	29665833
chr8	29665833	29670059
chr8	29670059	29675484
chr8	39033408	39039473
chr8	61758154	61758503
chr8	61758503	61766992
chr8	80752362	80766060
chr8	89534480	89547478
chr8	93836688	93836831
chr8	93836831	93945016
chr8	125111319	125118642
chr8	125118642	125128683
chr8	125128683	125151774
chr8	125213661	125227157
chr8	125227157	125229751
chr8	125259461	125289776
chr8	125289776	125292328
chr8	125636876	125644092
chr8	125644092	125701198
chr8	125701198	125701757
chr8	127206027	127214477
chr8	127214477	127228762
chr8	127247514	127267959
chr9	21545434	21547069
chr9	21547069	21594547
chr9	21610877	21619602
chr9	21667989	21712188
chr9	21776817	21790271
chr9	42420968	42438266
chr9	60631289	60637043
chr9	60657692	60679911
chr9	63338266	63355661
chr9	91192302	91195581
chr9	107212640	107215705
chr9	107241597	107246643
chr9	129476217	129481003
chr9	129481003	129496725
chr9	129553007	129556914
chr9	129556914	129571375
chr9	129587131	129603665
chrX	28499506	28508032
chrX	40172383	40174846
chrX	45707597	45718301
chrX	45764619	45773487
chrX	46318409	46325336

## Sheet: gained_after_hdac4_silencing c3
chromosome	start	end
chr1	2652213	2655950
chr1	2748394	2757025
chr1	8070022	8099116
chr1	8119937	8135208
chr1	8155286	8202850
chr1	27528565	27543664
chr1	33429695	33443110
chr1	66293975	66303278
chr1	66331198	66353618
chr1	84147030	84177555
chr1	94300976	94327936
chr1	172885062	172917988
chr10	28111215	28121240
chr10	31931645	31943728
chr10	70575571	70585901
chr10	70581413	70584976
chr10	70581413	70585901
chr10	70584976	70585901
chr10	80497757	80507050
chr10	93464072	93477011
chr10	99963959	99979338
chr10	103894236	103909983
chr10	104110153	104119989
chr10	112378947	112405467
chr10	112488974	112493404
chr10	112507827	112548004
chr11	10648440	10666960
chr11	108886154	108898377
chr11	118907556	118929918
chr11	118913156	118913652
chr11	118913156	118913652
chr11	118927929	118929918
chr11	118927929	118929918
chr11	122136200	122141751
chr11	122154690	122199903
chr12	13559291	13582587
chr12	46430857	46453066
chr12	46469047	46474975
chr12	46548622	46554305
chr12	52144023	52153418
chr12	52144023	52144675
chr12	52144067	52144675
chr12	53366055	53372887
chr12	53366055	53366125
chr12	53366055	53366125
chr12	65630801	65635715
chr12	65648489	65658222
chr12	65818823	65831440
chr12	75634365	75668355
chr12	75697288	75728171
chr12	75943814	75953020
chr12	88920049	88969143
chr12	88969007	88969143
chr12	88969007	88969143
chr12	116495911	116507561
chr13	44300723	44314539
chr13	44300927	44302719
chr13	44301109	44301347
chr13	44301347	44302719
chr13	109264166	109268919
chr14	53841107	53851519
chr14	76942172	76962530
chr14	76947784	76957037
chr14	76947784	76957037
chr15	51863528	51875934
chr15	92800910	92832953
chr15	92800910	92801570
chr15	92800910	92801570
chr15	100712379	100724141
chr16	69069358	69076867
chr16	69391662	69418350
chr17	15960751	15965863
chr17	40949482	40959316
chr17	58383208	58415470
chr17	58415409	58415470
chr17	58415409	58415470
chr17	59828509	59847115
chr17	64659413	64713605
chr17	68378405	68385315
chr17	75680684	75707015
chr18	3596753	3627638
chr18	3648823	3666376
chr18	31241202	31245384
chr19	13152068	13172203
chr19	13841240	13857711
chr19	15832431	15838281
chr19	18364209	18382168
chr19	38683248	38692826
chr19	43757667	43766322
chr2	62569595	62580769
chr2	110104375	110114173
chr2	156336429	156341143
chr2	168198996	168202707
chr2	174119351	174123674
chr2	181775046	181814082
chr2	181893720	181900509
chr2	181946853	181959115
chr2	219685555	219704750
chr2	219685555	219687203
chr2	219685555	219687203
chr2	223538650	223564574
chr2	223697078	223701854
chr2	223700964	223701854
chr2	223700964	223701358
chr2	223701358	223701854
chr2	226047872	226065222
chr2	226113569	226126246
chr2	226649050	226674423
chr2	226754497	226760031
chr2	231612264	231622233
chr2	231613043	231622233
chr2	231613043	231622233
chr2	231665512	231680964
chr2	231674666	231680873
chr2	231674666	231680873
chr20	31559590	31570650
chr20	31559590	31559753
chr20	31694133	31717181
chr20	31694133	31694674
chr20	31694133	31694674
chr20	62734268	62741863
chr21	8228603	8234691
chr22	24201426	24210396
chr22	30195512	30224049
chr22	30251193	30257729
chr22	37317130	37332652
chr22	37743225	37753612
chr22	37781082	37785641
chr22	46067838	46075322
chr3	30596387	30625853
chr3	30596387	30596645
chr3	30596405	30596645
chr3	30611821	30614136
chr3	30611821	30614136
chr3	45123551	45135066
chr3	98536745	98576981
chr3	98894639	98901506
chr3	98954214	98984479
chr3	110576350	110585770
chr3	111902057	111936650
chr3	111902057	111902058
chr3	111902057	111902058
chr3	114643933	114652646
chr3	139298407	139312387
chr3	177344939	177359602
chr3	177344959	177345195
chr3	177344959	177345195
chr4	11542513	11548171
chr4	11542513	11543028
chr4	11542513	11543028
chr4	11614800	11634891
chr4	30750206	30868813
chr4	30903195	30920963
chr4	30938574	30957319
chr4	31018967	31067634
chr4	41144321	41147086
chr4	74361640	74376686
chr4	74620918	74634948
chr4	74649910	74667954
chr4	101018360	101023522
chr4	101102906	101164649
chr4	112169518	112174067
chr4	112169518	112173799
chr4	168535715	168548566
chr4	186804718	186828187
chr4	186929274	186936949
chr5	142354985	142366393
chr6	16711956	16722655
chr6	30768500	30784760
chr6	30810705	30815546
chr6	56713030	56726908
chr6	119254623	119261960
chr6	129489939	129500903
chr6	129644269	129649849
chr6	129648846	129649849
chr6	129648846	129649849
chr6	142008223	142015595
chr6	151023345	151070460
chr6	158698597	158738982
chr6	158849665	158867191
chr7	23346494	23358387
chr7	92694797	92699604
chr7	116686096	116692596
chr7	121298366	121303121
chr7	129844578	129855042
chr7	130839103	130854484
chr7	130844909	130846476
chr7	130844909	130846476
chr7	130853583	130854484
chr7	130853583	130854484
chr7	130881537	130916059
chr7	130881537	130882025
chr7	130993191	131015139
chr7	131014447	131015139
chr7	131014447	131015139
chr8	6593550	6603730
chr8	8287650	8297548
chr8	8289086	8289505
chr8	8289086	8289505
chr8	17837969	17852591
chr8	85653718	85660934
chr8	93836743	93939162
chr8	93836743	93836831
chr8	93836743	93836831
chr8	125119727	125127013
chr8	125260356	125280393
chr8	125653825	125698547
chr8	127206675	127224056
chr8	127207428	127214477
chr8	127207428	127214477
chr9	21553264	21593552
chr9	21668759	21694074
chr9	21777280	21789465
chr9	63338429	63347907
chr9	129479918	129497909
chr9	129552522	129568663
chrX	46317535	46325044
