# Supplementary material for: Super-enhancers reorganization controls re-sensitization of oxaliplatin-resistant FBXW7-mutated colorectal cancer
Source: Research Square preprint supplement (doi:10.21203/rs.3.rs-4758082/v1), 2024-07-30
Supplement: Supplementary file 2 [file 0b0c034cbde4e307191d1bcd.xlsx]

## Sheet: refined cluster 2 of SE
chr1	8017790	8023865
chr1	27541176	27543527
chr1	66291541	66359657
chr1	156117185	156130839
chr1	214428235	214440190
chr10	28177844	28182247
chr10	31929068	31948403
chr10	80497594	80505551
chr10	93422377	93480439
chr10	99963755	99978874
chr10	100003146	100007812
chr10	113070866	113087219
chr11	34598950	34602585
chr12	13557251	13583280
chr12	15688673	15702667
chr12	46446168	46454190
chr12	46470472	46474835
chr12	53364984	53374103
chr12	75622283	75669510
chr12	75690243	75738417
chr12	75745660	75768365
chr12	75877256	75901198
chr12	75942097	75959651
chr12	75977123	75987130
chr12	76017691	76029729
chr12	88549046	88578484
chr12	88919998	88964869
chr12	116494965	116529974
chr13	97255195	97259880
chr14	53840074	53855984
chr14	68247981	68254450
chr14	68545715	68548349
chr15	51863363	51876328
chr15	59273583	59299332
chr15	60371971	60379022
chr15	92802140	92832975
chr15	100712497	100728822
chr16	68920595	68930402
chr16	69062990	69078360
chr17	17011267	17015784
chr17	57293803	57296907
chr17	57371025	57376728
chr17	58364917	58417366
chr17	72385862	72390587
chr17	72406525	72408831
chr17	72603275	72623554
chr17	72657081	72663150
chr17	72715665	72717448
chr17	78313914	78329423
chr18	31230902	31245842
chr2	97867448	97871641
chr2	168194461	168217991
chr2	172246469	172255074
chr2	181764911	181792294
chr2	181876327	181905042
chr2	190606031	190610048
chr2	223543409	223564826
chr2	226753995	226773497
chr20	51739822	51761152
chr20	53610384	53624360
chr3	4986392	4997000
chr3	30596645	30611821
chr3	45120756	45139596
chr3	98954504	98984152
chr3	111925947	111954131
chr3	129655640	129664773
chr3	139297991	139326760
chr3	149574264	149583600
chr3	185786654	185790782
chr4	11497795	11515985
chr4	11542497	11549066
chr4	41144532	41162066
chr4	74367492	74376748
chr4	74415023	74418346
chr4	186726129	186737128
chr4	186804812	186847427
chr4	186920313	186938033
chr5	149439562	149446489
chr5	157602198	157608746
chr6	6809813	6827100
chr6	21021980	21023975
chr6	56651070	56663362
chr6	56708628	56714420
chr6	73578813	73586361
chr6	111984889	111987386
chr6	119244861	119261460
chr6	119309803	119317698
chr6	129641897	129648846
chr6	129663696	129685042
chr6	151013524	151018373
chr6	151035546	151082015
chr6	151119698	151127190
chr7	20340427	20352757
chr7	24821083	24826881
chr7	32659376	32670271
chr7	84041409	84043872
chr7	106773870	106776352
chr7	116686312	116715885
chr7	116770482	116778467
chr7	121297419	121299615
chr7	129949785	129958563
chr8	8289505	8298015
chr8	16825616	16838316
chr8	17795218	17804259
chr8	17837028	17857359
chr8	29664718	29675484
chr8	80752362	80762752
chr8	93836688	93905195
chr8	125218725	125229751
chr8	125259461	125292328
chr9	91192302	91195581
chr9	107212640	107215705
chr9	107241597	107246643
chrX	46318409	46325336

## Sheet: refined cluster 3 of SE
chr1	27528565	27543664
chr1	94300976	94327936
chr10	80497757	80507050
chr10	93464072	93477011
chr10	103894236	103909983
chr10	112489520	112493404
chr10	112507827	112548004
chr12	13559291	13582587
chr12	116495911	116507561
chr14	76942172	76960368
chr15	100712379	100724141
chr18	31241202	31245384
chr19	38683248	38692826
chr19	43757667	43766322
chr2	168198996	168202707
chr2	223538650	223564574
chr2	223697078	223701854
chr2	231665512	231680964
chr22	37743225	37753612
chr22	37781082	37785641
chr3	30596387	30625853
chr3	45123551	45135066
chr3	98894639	98901506
chr3	114643933	114652646
chr3	177344939	177359602
chr4	11542513	11548171
chr4	11614800	11634891
chr4	74361640	74376686
chr4	74620918	74634948
chr4	74649910	74667954
chr4	186804718	186828187
chr4	186929274	186936949
chr6	16711956	16722655
chr6	56713030	56726908
chr6	119254623	119261960
chr6	129644269	129649849
chr6	151023345	151045708
chr7	92694797	92699604
chr8	17837969	17852591
chr8	125119727	125127013
chr8	125260356	125280393
chr9	21553264	21591800
chr9	21777280	21789465
chrX	46317535	46325044
