# Supplementary material for: Super-enhancers reorganization controls re-sensitization of oxaliplatin-resistant FBXW7-mutated colorectal cancer
Source: Research Square preprint supplement (doi:10.21203/rs.3.rs-4758082/v1), 2024-07-30
Supplement: Supplementary file 3 [file 3be5ee58653df5487bd81f1b.xlsx]

## Sheet: CRC_samples_FBXW7 WT
TCGA_SAMPLE_ID	FBXW7_status
TCGA-AF-2690-01	WT
TCGA-AF-2691-01	WT
TCGA-AF-2692-01	WT
TCGA-AF-2693-01	WT
TCGA-AF-3400-01	WT
TCGA-AF-3911-01	WT
TCGA-AF-4110-01	WT
TCGA-AF-6136-01	WT
TCGA-AF-6655-01	WT
TCGA-AF-6672-01	WT
TCGA-AF-A56K-01	WT
TCGA-AF-A56L-01	WT
TCGA-AF-A56N-01	WT
TCGA-AG-3574-01	WT
TCGA-AG-3575-01	WT
TCGA-AG-3580-01	WT
TCGA-AG-3581-01	WT
TCGA-AG-3583-01	WT
TCGA-AG-3584-01	WT
TCGA-AG-3591-01	WT
TCGA-AG-3592-01	WT
TCGA-AG-3594-01	WT
TCGA-AG-3598-01	WT
TCGA-AG-3599-01	WT
TCGA-AG-3602-01	WT
TCGA-AG-3605-01	WT
TCGA-AG-3726-01	WT
TCGA-AG-3727-01	WT
TCGA-AG-3731-01	WT
TCGA-AG-3732-01	WT
TCGA-AG-3878-01	WT
TCGA-AG-3882-01	WT
TCGA-AG-3883-01	WT
TCGA-AG-3887-01	WT
TCGA-AG-3890-01	WT
TCGA-AG-3893-01	WT
TCGA-AG-3894-01	WT
TCGA-AG-3896-01	WT
TCGA-AG-3901-01	WT
TCGA-AG-3902-01	WT
TCGA-AG-3909-01	WT
TCGA-AG-4001-01	WT
TCGA-AG-4015-01	WT
TCGA-AG-4021-01	WT
TCGA-AG-4022-01	WT
TCGA-AG-A008-01	WT
TCGA-AG-A00Y-01	WT
TCGA-AG-A015-01	WT
TCGA-AG-A016-01	WT
TCGA-AG-A01J-01	WT
TCGA-AG-A01N-01	WT
TCGA-AG-A01W-01	WT
TCGA-AG-A01Y-01	WT
TCGA-AG-A020-01	WT
TCGA-AG-A026-01	WT
TCGA-AG-A02X-01	WT
TCGA-AG-A032-01	WT
TCGA-AH-6544-01	WT
TCGA-AH-6547-01	WT
TCGA-AH-6643-01	WT
TCGA-AH-6644-01	WT
TCGA-CI-6621-01	WT
TCGA-CI-6622-01	WT
TCGA-CI-6623-01	WT
TCGA-CI-6624-01	WT
TCGA-CL-4957-01	WT
TCGA-CL-5917-01	WT
TCGA-DC-4745-01	WT
TCGA-DC-4749-01	WT
TCGA-DC-5337-01	WT
TCGA-DC-6154-01	WT
TCGA-DC-6155-01	WT
TCGA-DC-6156-01	WT
TCGA-DC-6157-01	WT
TCGA-DC-6158-01	WT
TCGA-DC-6160-01	WT
TCGA-DC-6681-01	WT
TCGA-DC-6683-01	WT
TCGA-DT-5265-01	WT
TCGA-DY-A0XA-01	WT
TCGA-DY-A1DC-01	WT
TCGA-DY-A1DD-01	WT
TCGA-DY-A1DE-01	WT
TCGA-DY-A1DF-01	WT
TCGA-DY-A1DG-01	WT
TCGA-DY-A1H8-01	WT
TCGA-EF-5831-01	WT
TCGA-EI-6506-01	WT
TCGA-EI-6508-01	WT
TCGA-EI-6509-01	WT
TCGA-EI-6510-01	WT
TCGA-EI-6511-01	WT
TCGA-EI-6512-01	WT
TCGA-EI-6513-01	WT
TCGA-EI-6514-01	WT
TCGA-EI-6881-01	WT
TCGA-EI-6882-01	WT
TCGA-EI-6883-01	WT
TCGA-EI-6884-01	WT
TCGA-EI-6885-01	WT
TCGA-EI-7002-01	WT
TCGA-EI-7004-01	WT
TCGA-F5-6464-01	WT
TCGA-F5-6465-01	WT
TCGA-F5-6571-01	WT
TCGA-F5-6702-01	WT
TCGA-F5-6810-01	WT
TCGA-F5-6811-01	WT
TCGA-F5-6812-01	WT
TCGA-F5-6813-01	WT
TCGA-F5-6861-01	WT
TCGA-F5-6863-01	WT
TCGA-F5-6864-01	WT
TCGA-G5-6641-01	WT
TCGA-3L-AA1B-01	WT
TCGA-4N-A93T-01	WT
TCGA-4T-AA8H-01	WT
TCGA-5M-AAT6-01	WT
TCGA-5M-AATE-01	WT
TCGA-A6-2671-01	WT
TCGA-A6-2674-01	WT
TCGA-A6-2675-01	WT
TCGA-A6-2678-01	WT
TCGA-A6-2681-01	WT
TCGA-A6-2683-01	WT
TCGA-A6-2684-01	WT
TCGA-A6-2685-01	WT
TCGA-A6-3808-01	WT
TCGA-A6-3810-01	WT
TCGA-A6-4105-01	WT
TCGA-A6-4107-01	WT
TCGA-A6-5656-01	WT
TCGA-A6-5659-01	WT
TCGA-A6-5660-01	WT
TCGA-A6-5662-01	WT
TCGA-A6-5664-01	WT
TCGA-A6-5665-01	WT
TCGA-A6-5666-01	WT
TCGA-A6-5667-01	WT
TCGA-A6-6138-01	WT
TCGA-A6-6648-01	WT
TCGA-A6-6649-01	WT
TCGA-A6-6650-01	WT
TCGA-A6-6651-01	WT
TCGA-A6-6652-01	WT
TCGA-A6-6653-01	WT
TCGA-A6-6654-01	WT
TCGA-A6-6780-01	WT
TCGA-A6-6781-01	WT
TCGA-A6-6782-01	WT
TCGA-A6-A565-01	WT
TCGA-A6-A566-01	WT
TCGA-A6-A567-01	WT
TCGA-A6-A56B-01	WT
TCGA-AA-3489-01	WT
TCGA-AA-3492-01	WT
TCGA-AA-3496-01	WT
TCGA-AA-3502-01	WT
TCGA-AA-3506-01	WT
TCGA-AA-3510-01	WT
TCGA-AA-3511-01	WT
TCGA-AA-3514-01	WT
TCGA-AA-3517-01	WT
TCGA-AA-3519-01	WT
TCGA-AA-3520-01	WT
TCGA-AA-3521-01	WT
TCGA-AA-3522-01	WT
TCGA-AA-3524-01	WT
TCGA-AA-3526-01	WT
TCGA-AA-3527-01	WT
TCGA-AA-3529-01	WT
TCGA-AA-3530-01	WT
TCGA-AA-3531-01	WT
TCGA-AA-3532-01	WT
TCGA-AA-3534-01	WT
TCGA-AA-3538-01	WT
TCGA-AA-3544-01	WT
TCGA-AA-3548-01	WT
TCGA-AA-3549-01	WT
TCGA-AA-3560-01	WT
TCGA-AA-3561-01	WT
TCGA-AA-3655-01	WT
TCGA-AA-3660-01	WT
TCGA-AA-3663-01	WT
TCGA-AA-3664-01	WT
TCGA-AA-3666-01	WT
TCGA-AA-3667-01	WT
TCGA-AA-3673-01	WT
TCGA-AA-3678-01	WT
TCGA-AA-3679-01	WT
TCGA-AA-3680-01	WT
TCGA-AA-3684-01	WT
TCGA-AA-3685-01	WT
TCGA-AA-3688-01	WT
TCGA-AA-3692-01	WT
TCGA-AA-3693-01	WT
TCGA-AA-3695-01	WT
TCGA-AA-3696-01	WT
TCGA-AA-3712-01	WT
TCGA-AA-3811-01	WT
TCGA-AA-3812-01	WT
TCGA-AA-3814-01	WT
TCGA-AA-3819-01	WT
TCGA-AA-3821-01	WT
TCGA-AA-3841-01	WT
TCGA-AA-3842-01	WT
TCGA-AA-3844-01	WT
TCGA-AA-3846-01	WT
TCGA-AA-3851-01	WT
TCGA-AA-3854-01	WT
TCGA-AA-3855-01	WT
TCGA-AA-3856-01	WT
TCGA-AA-3858-01	WT
TCGA-AA-3864-01	WT
TCGA-AA-3866-01	WT
TCGA-AA-3867-01	WT
TCGA-AA-3875-01	WT
TCGA-AA-3877-01	WT
TCGA-AA-3947-01	WT
TCGA-AA-3950-01	WT
TCGA-AA-3952-01	WT
TCGA-AA-3955-01	WT
TCGA-AA-3956-01	WT
TCGA-AA-3966-01	WT
TCGA-AA-3968-01	WT
TCGA-AA-3971-01	WT
TCGA-AA-3973-01	WT
TCGA-AA-3975-01	WT
TCGA-AA-3976-01	WT
TCGA-AA-3977-01	WT
TCGA-AA-3986-01	WT
TCGA-AA-3989-01	WT
TCGA-AA-3994-01	WT
TCGA-AA-A004-01	WT
TCGA-AA-A00N-01	WT
TCGA-AA-A00Z-01	WT
TCGA-AA-A010-01	WT
TCGA-AA-A017-01	WT
TCGA-AA-A01C-01	WT
TCGA-AA-A01I-01	WT
TCGA-AA-A01P-01	WT
TCGA-AA-A01S-01	WT
TCGA-AA-A01T-01	WT
TCGA-AA-A01V-01	WT
TCGA-AA-A01X-01	WT
TCGA-AA-A02E-01	WT
TCGA-AA-A02F-01	WT
TCGA-AA-A02H-01	WT
TCGA-AA-A02O-01	WT
TCGA-AA-A02R-01	WT
TCGA-AA-A02W-01	WT
TCGA-AA-A02Y-01	WT
TCGA-AA-A03J-01	WT
TCGA-AD-5900-01	WT
TCGA-AD-6888-01	WT
TCGA-AD-6890-01	WT
TCGA-AD-6895-01	WT
TCGA-AD-6899-01	WT
TCGA-AD-6901-01	WT
TCGA-AD-6963-01	WT
TCGA-AD-6965-01	WT
TCGA-AD-A5EJ-01	WT
TCGA-AD-A5EK-01	WT
TCGA-AM-5820-01	WT
TCGA-AU-3779-01	WT
TCGA-AU-6004-01	WT
TCGA-AY-4070-01	WT
TCGA-AY-4071-01	WT
TCGA-AY-5543-01	WT
TCGA-AY-6196-01	WT
TCGA-AY-6197-01	WT
TCGA-AY-A69D-01	WT
TCGA-AY-A71X-01	WT
TCGA-AY-A8YK-01	WT
TCGA-AZ-4308-01	WT
TCGA-AZ-4315-01	WT
TCGA-AZ-4323-01	WT
TCGA-AZ-4614-01	WT
TCGA-AZ-4615-01	WT
TCGA-AZ-4616-01	WT
TCGA-AZ-4681-01	WT
TCGA-AZ-4682-01	WT
TCGA-AZ-4684-01	WT
TCGA-AZ-5403-01	WT
TCGA-AZ-5407-01	WT
TCGA-AZ-6598-01	WT
TCGA-AZ-6599-01	WT
TCGA-AZ-6600-01	WT
TCGA-AZ-6603-01	WT
TCGA-AZ-6605-01	WT
TCGA-AZ-6606-01	WT
TCGA-AZ-6607-01	WT
TCGA-CA-5254-01	WT
TCGA-CA-5255-01	WT
TCGA-CA-5256-01	WT
TCGA-CA-5796-01	WT
TCGA-CA-5797-01	WT
TCGA-CA-6715-01	WT
TCGA-CA-6716-01	WT
TCGA-CA-6719-01	WT
TCGA-CK-4947-01	WT
TCGA-CK-4950-01	WT
TCGA-CK-4951-01	WT
TCGA-CK-4952-01	WT
TCGA-CK-5912-01	WT
TCGA-CK-5913-01	WT
TCGA-CK-5914-01	WT
TCGA-CK-5915-01	WT
TCGA-CK-5916-01	WT
TCGA-CK-6747-01	WT
TCGA-CK-6748-01	WT
TCGA-CK-6751-01	WT
TCGA-CM-4746-01	WT
TCGA-CM-4747-01	WT
TCGA-CM-4748-01	WT
TCGA-CM-4751-01	WT
TCGA-CM-4752-01	WT
TCGA-CM-5341-01	WT
TCGA-CM-5344-01	WT
TCGA-CM-5348-01	WT
TCGA-CM-5349-01	WT
TCGA-CM-5860-01	WT
TCGA-CM-5861-01	WT
TCGA-CM-5862-01	WT
TCGA-CM-5863-01	WT
TCGA-CM-5864-01	WT
TCGA-CM-5868-01	WT
TCGA-CM-6161-01	WT
TCGA-CM-6162-01	WT
TCGA-CM-6163-01	WT
TCGA-CM-6164-01	WT
TCGA-CM-6165-01	WT
TCGA-CM-6166-01	WT
TCGA-CM-6167-01	WT
TCGA-CM-6168-01	WT
TCGA-CM-6169-01	WT
TCGA-CM-6170-01	WT
TCGA-CM-6171-01	WT
TCGA-CM-6172-01	WT
TCGA-CM-6674-01	WT
TCGA-CM-6675-01	WT
TCGA-CM-6676-01	WT
TCGA-CM-6678-01	WT
TCGA-CM-6679-01	WT
TCGA-CM-6680-01	WT
TCGA-D5-5537-01	WT
TCGA-D5-5538-01	WT
TCGA-D5-5539-01	WT
TCGA-D5-5540-01	WT
TCGA-D5-5541-01	WT
TCGA-D5-6529-01	WT
TCGA-D5-6532-01	WT
TCGA-D5-6533-01	WT
TCGA-D5-6534-01	WT
TCGA-D5-6535-01	WT
TCGA-D5-6536-01	WT
TCGA-D5-6537-01	WT
TCGA-D5-6538-01	WT
TCGA-D5-6539-01	WT
TCGA-D5-6540-01	WT
TCGA-D5-6541-01	WT
TCGA-D5-6920-01	WT
TCGA-D5-6922-01	WT
TCGA-D5-6923-01	WT
TCGA-D5-6924-01	WT
TCGA-D5-6926-01	WT
TCGA-D5-6929-01	WT
TCGA-D5-6930-01	WT
TCGA-D5-6932-01	WT
TCGA-D5-7000-01	WT
TCGA-DM-A0X9-01	WT
TCGA-DM-A0XF-01	WT
TCGA-DM-A1D0-01	WT
TCGA-DM-A1D4-01	WT
TCGA-DM-A1D6-01	WT
TCGA-DM-A1D7-01	WT
TCGA-DM-A1D8-01	WT
TCGA-DM-A1D9-01	WT
TCGA-DM-A1DA-01	WT
TCGA-DM-A1DB-01	WT
TCGA-DM-A1HA-01	WT
TCGA-DM-A280-01	WT
TCGA-DM-A282-01	WT
TCGA-DM-A285-01	WT
TCGA-DM-A288-01	WT
TCGA-DM-A28A-01	WT
TCGA-DM-A28C-01	WT
TCGA-DM-A28E-01	WT
TCGA-DM-A28F-01	WT
TCGA-DM-A28H-01	WT
TCGA-DM-A28K-01	WT
TCGA-DM-A28M-01	WT
TCGA-F4-6459-01	WT
TCGA-F4-6460-01	WT
TCGA-F4-6461-01	WT
TCGA-F4-6463-01	WT
TCGA-F4-6569-01	WT
TCGA-F4-6570-01	WT
TCGA-F4-6703-01	WT
TCGA-F4-6704-01	WT
TCGA-F4-6805-01	WT
TCGA-F4-6806-01	WT
TCGA-F4-6807-01	WT
TCGA-F4-6808-01	WT
TCGA-F4-6809-01	WT
TCGA-F4-6854-01	WT
TCGA-F4-6855-01	WT
TCGA-F4-6856-01	WT
TCGA-G4-6294-01	WT
TCGA-G4-6295-01	WT
TCGA-G4-6297-01	WT
TCGA-G4-6298-01	WT
TCGA-G4-6299-01	WT
TCGA-G4-6303-01	WT
TCGA-G4-6304-01	WT
TCGA-G4-6306-01	WT
TCGA-G4-6307-01	WT
TCGA-G4-6311-01	WT
TCGA-G4-6315-01	WT
TCGA-G4-6317-01	WT
TCGA-G4-6320-01	WT
TCGA-G4-6321-01	WT
TCGA-G4-6322-01	WT
TCGA-G4-6323-01	WT
TCGA-G4-6586-01	WT
TCGA-G4-6588-01	WT
TCGA-G4-6626-01	WT
TCGA-G4-6627-01	WT
TCGA-NH-A50U-01	WT
TCGA-NH-A50V-01	WT
TCGA-NH-A5IV-01	WT
TCGA-NH-A6GA-01	WT
TCGA-NH-A8F7-01	WT
TCGA-NH-A8F8-01	WT
TCGA-QG-A5YV-01	WT
TCGA-QG-A5Z1-01	WT
TCGA-QG-A5Z2-01	WT
TCGA-QL-A97D-01	WT
TCGA-RU-A8FL-01	WT
TCGA-SS-A7HO-01	WT
TCGA-T9-A92H-01	WT
TCGA-5M-AATA-01	WT

## Sheet: CRC_samples_FBXW7 LOF
TCGA_SAMPLE_ID	FBXW7_status
TCGA-AA-3713-01	A626D
TCGA-CA-6718-01	D279Y
TCGA-AA-3845-01	E192A
TCGA-AA-3837-01	E287V
TCGA-AF-5654-01	E369* S191*
TCGA-CM-4743-01	G233C
TCGA-AG-A011-01	G437R D600Y
TCGA-AD-6889-01	G93*
TCGA-CM-4744-01	H420Qfs*13
TCGA-DC-5869-01	H580Y L443F
TCGA-AD-6548-01	K371*
TCGA-CK-6746-01	L577S
TCGA-QG-A5YX-01	L660Qfs*47
TCGA-G4-6628-01	N621Kfs*23
TCGA-CI-6619-01	P274Vfs*11
TCGA-CI-6620-01	Q492Rfs*6
TCGA-D5-6898-01	R14*
TCGA-AG-3892-01	R14Q
TCGA-AA-3984-01	R14Q D520Y K167T
TCGA-AH-6903-01	R224*
TCGA-AA-3982-01	R339*
TCGA-AG-3725-01	R367*
TCGA-AH-6897-01	R367*
TCGA-AA-3833-01	R367*
TCGA-AA-3949-01	R367*
TCGA-AY-6386-01	R367*
TCGA-CM-4750-01	R367* V37Rfs*24
TCGA-AG-3898-01	R465C
TCGA-AG-A02N-01	R465C
TCGA-DC-6682-01	R465C
TCGA-A6-5661-01	R465C
TCGA-AA-3848-01	R465C
TCGA-D5-6928-01	R465C
TCGA-D5-6931-01	R465C
TCGA-DM-A1HB-01	R465C
TCGA-QG-A5YW-01	R465C R224*
TCGA-AG-3881-01	R465H
TCGA-EF-5830-01	R465H
TCGA-F5-6814-01	R465H
TCGA-AA-3675-01	R465H
TCGA-AA-3681-01	R465H
TCGA-AA-3852-01	R465H
TCGA-AA-A01R-01	R465H
TCGA-AA-A03F-01	R465H
TCGA-AM-5821-01	R465H
TCGA-NH-A50T-01	R465H
TCGA-NH-A6GB-01	R465H
TCGA-5M-AAT5-01	R465H
TCGA-EI-6507-01	R473Kfs*4
TCGA-AF-2687-01	R479*
TCGA-A6-6137-01	R479*
TCGA-G4-6293-01	R479G
TCGA-AG-3885-01	R505C
TCGA-A6-3807-01	R505C
TCGA-A6-3809-01	R505C
TCGA-D5-6927-01	R505C
TCGA-WS-AB45-01	R505C
TCGA-A6-2677-01	R505G
TCGA-AA-A024-01	R505H
TCGA-DM-A28G-01	R505H
TCGA-CM-6677-01	R513W
TCGA-CL-5918-01	R658*
TCGA-AA-3979-01	R658*
TCGA-NH-A6GC-01	R658*
TCGA-AG-A002-01	R658* K239Q R179H
TCGA-CA-6717-01	R658* R14Q R393Q
TCGA-A6-2686-01	R658Q
TCGA-AA-A022-01	R658Q
TCGA-A6-5657-01	R689W
TCGA-A6-6142-01	R689W
TCGA-5M-AAT4-01	R689W S582L A305Sfs*13
TCGA-CK-4948-01	S191*
TCGA-EI-6917-01	S282* E97*
TCGA-AA-3850-01	S476R
TCGA-AG-3742-01	S582L
TCGA-AA-3831-01	S582L
TCGA-AA-A01Z-01	S582L D520N
TCGA-D5-6531-01	S582L Q388Tfs*5
TCGA-AA-3715-01	S668Vfs*39
TCGA-D5-6530-01	S668Vfs*39
TCGA-G4-6309-01	S668Vfs*39
TCGA-AD-6964-01	T196S
TCGA-AA-3818-01	T263Nfs*24
TCGA-G4-6302-01	T536P
TCGA-AY-A54L-01	T653M
TCGA-DM-A0XD-01	V405Ffs*10 S438F
TCGA-AA-3980-01	V485Ffs*13

## Sheet: CRC_samples_FBXW7 WT+OxPt
TCGA_SAMPLE_ID	FBXW7_status
TCGA-CI-6620-01	Q492Rfs*6
TCGA-AH-6903-01	R224*
TCGA-AY-6386-01	R367*
TCGA-CM-4750-01	R367* V37Rfs*24
TCGA-QG-A5YW-01	R465C R224*
TCGA-NH-A6GB-01	R465H
TCGA-A6-6137-01	R479*
TCGA-AF-2687-01	R479*
TCGA-A6-3807-01	R505C
TCGA-A6-2677-01	R505G
TCGA-NH-A6GC-01	R658*
TCGA-CA-6717-01	R658* R14Q R393Q
TCGA-A6-5657-01	R689W
TCGA-A6-6142-01	R689W
TCGA-AG-A00C-01	X473_splice
