# Supplementary material for: Super-enhancers reorganization controls re-sensitization of oxaliplatin-resistant FBXW7-mutated colorectal cancer
Source: Research Square preprint supplement (doi:10.21203/rs.3.rs-4758082/v1), 2024-07-30
Supplement: Supplementary file 4 [file 76d2cff455677e973541c3aa.xlsx]

## Sheet: HColA030PG03 Specs
Position	No.	Age	Sex	Organ/Anatomic Site	Pathology diagnosis	TNM	Grade	Stage	Type
A1	1	68	F	Colon	Adenocarcinoma	N2aM0	II	3	tumor
A2	2	68	F	Colon	NAT				nat
A3	3	61	M	Colon	Adenocarcinoma	N0M0	II		tumor
A4	4	61	M	Colon	NAT				nat
A5	5	77	M	Colon	Adenocarcinoma	N0M0	II		tumor
A6	6	77	M	Colon	NAT				nat
A7	7	53	F	Colon	Adenocarcinoma	N2bM0	II	3	tumor
A8	8	53	F	Colon	NAT				nat
B1	9	57	F	Colon	Adenocarcinoma	N1bM0	II	3	tumor
B2	10	57	F	Colon	NAT				nat
B3	11	52	M	Colon	Adenocarcinoma	N1aM0	II	3	tumor
B4	12	52	M	Colon	NAT				nat
B5	13	54	M	Colon	Adenocarcinoma	N0M0	II		tumor
B6	14	54	M	Colon	NAT				nat
B7	15	62	M	Colon	Adenocarcinoma	N1bM0	II	3	tumor
B8	16	62	M	Colon	NAT				nat
C1	17	61	M	Colon	Adenocarcinoma	N0M0	II		tumor
C2	18	61	M	Colon	NAT				nat
C3	19	61	F	Colon	Adenocarcinoma	N2bM0	II	3	tumor
C4	20	61	F	Colon	NAT				nat
C5	21	72	M	Colon	Adenocarcinoma	N1bM0	II	3	tumor
C6	22	72	M	Colon	NAT				nat
C7	23	59	M	Colon	Adenocarcinoma	N0M0	II		tumor
C8	24	59	M	Colon	NAT				nat
D1	25	53	F	Colon	Adenocarcinoma	N1aM0	II	3	tumor
D2	26	53	F	Colon	NAT				nat
D3	27	64	F	Colon	Adenocarcinoma	N0M0	II		tumor
D4	28	64	F	Colon	NAT				nat
D5	29	78	M	Colon	Adenocarcinoma	N2bM0	II-III	3	tumor
D6	30	78	M	Colon	NAT				nat
