# Supplementary material for: Super-enhancers reorganization controls re-sensitization of oxaliplatin-resistant FBXW7-mutated colorectal cancer
Source: Research Square preprint supplement (doi:10.21203/rs.3.rs-4758082/v1), 2024-07-30
Supplement: Supplementary file 5 [file 8bd77722bde0226d0b1d4045.xlsx]

## Sheet: Foglio1
Table S7: expression levels of genes, associated to SE gained after after HDAC4 depletion in CRC cells and PDOs, in CRC PDX found to be sensitive to OxPt treatment vs resistant (GSE28691)
ID	adj.P.Val	P.Value	t	B	logFC	Gene.symbol	Gene.title
218633_x_at	0.97371	0.85	0.19238	-5.7054	-0.0306698	ABHD10	abhydrolase domain containing 10
211148_s_at	0.86259	0.457	0.765271	-5.4487	-0.0900603	ANGPT2	angiopoietin 2
216750_at	0.74354	0.169	-1.45011	-4.7906	0.226293	APBB2	amyloid beta precursor protein binding family B member 2
212312_at	0.7569	0.185	1.39277	-4.858	-0.281482	BCL2L1	BCL2 like 1
201634_s_at	0.97636	0.863	-0.175741	-5.7083	0.0555368	CYB5B	cytochrome b5 type B
206424_at	0.75135	0.178	-1.41601	-4.8309	0.209071	CYP26A1	cytochrome P450 family 26 subfamily A member 1
210452_x_at	0.93734	0.709	-0.380475	-5.6541	0.115393	CYP4F2	cytochrome P450 family 4 subfamily F member 2
212650_at	0.7997	0.272	1.14416	-5.1259	-0.153967	EHBP1	EH domain binding protein 1
205465_x_at	0.95832	0.788	0.27395	-5.6872	-0.020698	HS3ST1	heparan sulfate-glucosamine 3-sulfotransferase 1
216839_at	0.71594	0.13	-1.60739	-4.5962	0.112433	LAMA2	laminin subunit alpha 2
205266_at	0.82023	0.322	1.02732	-5.2372	-0.318831	LIF	leukemia inhibitory factor
204423_at	0.79959	0.271	-1.14651	-5.1236	0.170645	MKLN1	muskelin 1
201798_s_at	0.99991	0.997	0.0037329	-5.7231	-0.00214571	MYOF	myoferlin
207333_at	0.7662	0.199	-1.3477	-4.9095	0.131167	NMBR	neuromedin B receptor
220194_at	0.90198	0.592	-0.54824	-5.5807	0.0639537	NSUN7	NOP2/Sun RNA methyltransferase family member 7
208558_at	0.79755	0.268	-1.15376	-5.1163	0.128281	OR10H1	olfactory receptor family 10 subfamily H member 1
214532_x_at	0.84313	0.389	-0.888996	-5.3556	0.149495	POU5F1B	POU class 5 homeobox 1B
208549_x_at	0.81018	0.296	1.08435	-5.1841	-0.132902	PTMA	prothymosin, alpha
200773_x_at	0.98921	0.923	0.0989234	-5.7184	-0.00765571	PTMA	prothymosin, alpha
218704_at	0.92244	0.649	-0.464994	-5.6203	0.162653	RNF43	ring finger protein 43
204035_at	0.84222	0.384	0.898796	-5.3477	-0.112166	SCG2	secretogranin II
201484_at	0.93262	0.69	0.407074	-5.6442	-0.119703	SUPT4H1	SPT4 homolog, DSIF elongation factor subunit
203611_at	0.88765	0.548	-0.61492	-5.5445	0.11217	TERF2	telomeric repeat binding factor 2
218345_at	0.64691	0.0638	-2.01069	-4.0427	0.766109	TMEM176A	transmembrane protein 176A
Table S7: expression levels of genes, associated to SE lost after after HDAC4 depletion in CRC cells and PDOs, in CRC PDX found to be sensitive to OxPt treatment vs resistant (GSE28691)
ID	adj.P.Val	P.Value	t	B	logFC (oxpt sensitive vs resistant)	Gene.symbol	Gene.title
206155_at	0.66874	0.0817	-1.8738	-4.2384	0.688264	ABCC2	ATP binding cassette subfamily C member 2
205891_at	0.76976	0.207	1.32193	-4.9384	-0.367782	ADORA2B	adenosine A2b receptor
210517_s_at	0.56603	0.0285	2.43905	-3.391	-1.54439	AKAP12	A-kinase anchoring protein 12
203180_at	0.87487	0.506	-0.682219	-5.504	0.19627	ALDH1A3	aldehyde dehydrogenase 1 family member A3
213099_at	0.71597	0.131	-1.60443	-4.6	0.324413	ANGEL1	angel homolog 1
210143_at	0.76672	0.2	1.34542	-4.9121	-0.296041	ANXA10	annexin A10
201590_x_at	0.78125	0.24	1.22525	-5.043	-0.386122	ANXA2	annexin A2
216747_at	0.96263	0.804	-0.252985	-5.6925	0.0315473	APBB2	amyloid beta precursor protein binding family B member 2
215564_at	0.9972	0.975	-0.0318844	-5.7226	0.00341669	AREG	amphiregulin
221077_at	0.85273	0.421	-0.828352	-5.4028	0.0745857	ARMC4	armadillo repeat containing 4
219996_at	0.92412	0.654	-0.458127	-5.6233	0.0553632	ASB7	ankyrin repeat and SOCS box containing 7
205808_at	0.86118	0.444	0.786889	-5.4333	-0.216668	ASPH	aspartate beta-hydroxylase
214993_at	0.50285	0.0109	2.92729	-2.6021	-0.318339	ASPHD1	aspartate beta-hydroxylase domain containing 1
220829_s_at	0.7662	0.199	-1.34828	-4.9088	0.100895	B3GALT1	beta-1,3-galactosyltransferase 1
204378_at	0.73303	0.154	1.50741	-4.7214	-0.35598	BCAS1	breast carcinoma amplified sequence 1
207326_at	0.81213	0.299	-1.07851	-5.1896	0.213921	BTC	betacellulin
201238_s_at	0.69935	0.113	-1.68742	-4.4923	0.282423	CAPZA2	capping actin protein of muscle Z-line alpha subunit 2
211174_s_at	0.92641	0.665	-0.441864	-5.6302	0.0498329	CCKAR	cholecystokinin A receptor
206337_at	0.60014	0.0394	-2.26942	-3.6552	0.20998	CCR7	C-C motif chemokine receptor 7
209554_at	0.80542	0.284	1.11308	-5.1565	-0.0808775	CD36	CD36 molecule
218451_at	0.76562	0.198	1.35182	-4.9048	-0.17686	CDCP1	CUB domain containing protein 1
203461_at	0.76975	0.207	-1.32336	-4.9368	0.225993	CHD2	chromodomain helicase DNA binding protein 2
208096_s_at	0.95911	0.792	0.269119	-5.6885	-0.0179574	COL21A1	collagen type XXI alpha 1 chain
214587_at	0.98483	0.903	-0.123505	-5.7158	0.00843991	COL8A1	collagen type VIII alpha 1 chain
219652_s_at	0.83878	0.372	-0.92138	-5.3292	0.10634	CXorf36	chromosome X open reading frame 36
206424_at	0.75135	0.178	-1.41601	-4.8309	0.209071	CYP26A1	cytochrome P450 family 26 subfamily A member 1
210452_x_at	0.93734	0.709	-0.380475	-5.6541	0.115393	CYP4F2	cytochrome P450 family 4 subfamily F member 2
211521_s_at	0.73678	0.158	-1.48887	-4.744	0.127988	CYTH4	cytohesin 4
213865_at	0.64476	0.0619	2.0268	-4.0192	-0.215756	DCBLD2	discoidin, CUB and LCCL domain containing 2
218986_s_at	0.95226	0.768	-0.300858	-5.6799	0.234586	DDX60	DEXD/H-box helicase 60
203695_s_at	0.87611	0.515	0.667746	-5.5131	-0.0838578	DFNA5	DFNA5, deafness associated tumor suppressor
206489_s_at	0.92876	0.676	-0.426629	-5.6365	0.0300772	DLGAP1	DLG associated protein 1
212838_at	0.8678	0.477	-0.730085	-5.4728	0.182943	DNMBP	dynamin binding protein
219651_at	0.82126	0.324	-1.02228	-5.2417	0.0665483	DPPA4	developmental pluripotency associated 4
212253_x_at	0.55639	0.0221	2.56917	-3.1841	-0.68571	DST	dystonin
209457_at	0.94501	0.739	-0.33931	-5.6682	0.15728	DUSP5	dual specificity phosphatase 5
207042_at	0.88649	0.544	0.621135	-5.5409	-0.0402836	E2F2	E2F transcription factor 2
219298_at	0.72273	0.139	-1.56756	-4.6467	0.940463	ECHDC3	enoyl-CoA hydratase domain containing 3
201510_at	0.75081	0.177	1.41942	-4.8269	-0.241017	ELF3	E74 like ETS transcription factor 3
203499_at	0.86666	0.472	0.738192	-5.4674	-0.209121	EPHA2	EPH receptor A2
210870_s_at	0.96869	0.827	0.223032	-5.6993	-0.0223078	EPM2A	epilepsy, progressive myoclonus type 2A, Lafora disease (laforin)
202609_at	0.98339	0.892	-0.137826	-5.714	0.039915	EPS8	epidermal growth factor receptor pathway substrate 8
205767_at	0.97317	0.846	-0.197288	-5.7045	0.225405	EREG	epiregulin
208621_s_at	0.21727	0.000182	5.01752	0.7266	-0.988163	EZR	ezrin
51158_at	0.85829	0.437	0.800414	-5.4235	-0.17369	FAM174B	family with sequence similarity 174 member B
220150_s_at	0.85533	0.428	-0.81609	-5.412	0.10028	FAM184A	family with sequence similarity 184 member A
210865_at	0.98776	0.915	0.108207	-5.7175	-0.0134149	FASLG	Fas ligand
201579_at	0.94723	0.75	-0.324498	-5.6728	0.0871909	FAT1	FAT atypical cadherin 1
208513_at	0.87487	0.505	-0.684289	-5.5027	0.0478426	FOXB1	forkhead box B1
210043_at	0.63538	0.0553	-2.08877	-3.928	0.162427	FRMD8	FERM domain containing 8
221576_at	0.76328	0.193	-1.36764	-4.8868	0.112055	GDF15	growth differentiation factor 15
205582_s_at	0.78079	0.239	-1.2284	-5.0397	0.117829	GGT5	gamma-glutamyltransferase 5
209576_at	0.51021	0.0145	2.78363	-2.8373	-1.35839	GNAI1	G protein subunit alpha i1
210007_s_at	0.80654	0.287	1.10611	-5.1632	-0.229073	GPD2	glycerol-3-phosphate dehydrogenase 2
207055_at	0.85791	0.436	-0.801523	-5.4227	0.058261	GPR37L1	G protein-coupled receptor 37 like 1
208025_s_at	0.87047	0.485	-0.716544	-5.4819	0.426931	HMGA2	high mobility group AT-hook 2
205466_s_at	0.71824	0.133	1.59328	-4.6142	-0.533302	HS3ST1	heparan sulfate-glucosamine 3-sulfotransferase 1
207826_s_at	0.87611	0.515	0.667881	-5.513	-0.524828	ID3	inhibitor of DNA binding 3, HLH protein
201631_s_at	0.71824	0.134	-1.58905	-4.6196	0.473902	IER3	immediate early response 3
216493_s_at	0.92141	0.646	-0.46979	-5.6182	0.116887	IGF2BP3	insulin like growth factor 2 mRNA binding protein 3
204686_at	0.86533	0.468	-0.746296	-5.4618	0.27686	IRS1	insulin receptor substrate 1
216268_s_at	0.86174	0.454	0.770623	-5.4449	-0.640164	JAG1	jagged 1
222379_at	0.80599	0.285	1.1123	-5.1572	-0.103432	KCNE4	potassium voltage-gated channel subfamily E regulatory subunit 4
206583_at	0.66779	0.0811	-1.87789	-4.2327	0.332564	KRBOX4	KRAB box domain containing 4
203203_s_at	0.90999	0.612	0.518738	-5.5955	-0.100095	KRR1	KRR1, small subunit processome component homolog
213953_at	0.96129	0.797	-0.262321	-5.6902	0.173999	KRT20	keratin 20
218963_s_at	0.87106	0.491	-0.707093	-5.4881	0.726247	KRT23	keratin 23
205116_at	0.56603	0.0288	2.43244	-3.4014	-0.58139	LAMA2	laminin subunit alpha 2
210712_at	0.68675	0.0949	-1.78979	-4.3548	0.135486	LDHAL6B	lactate dehydrogenase A like 6B
205859_at	0.94694	0.749	0.325722	-5.6725	-0.038125	LY86	lymphocyte antigen 86
220037_s_at	0.95655	0.781	-0.283388	-5.6847	0.0248388	LYVE1	lymphatic vessel endothelial hyaluronan receptor 1
218559_s_at	0.56603	0.0279	2.44938	-3.3747	-0.881982	MAFB	MAF bZIP transcription factor B
208116_s_at	0.97361	0.849	0.193889	-5.7051	-0.0568935	MAN1A1	mannosidase alpha class 1A member 1
213816_s_at	0.82943	0.345	-0.976467	-5.2824	0.20977	MET	MET proto-oncogene, receptor tyrosine kinase
204423_at	0.79959	0.271	-1.14651	-5.1236	0.170645	MKLN1	muskelin 1
214771_x_at	0.75327	0.181	1.40789	-4.8404	-0.291563	MPRIP	myosin phosphatase Rho interacting protein
211363_s_at	0.6652	0.0791	1.89181	-4.2131	-0.428175	MTAP	methylthioadenosine phosphorylase
203072_at	0.89356	0.57	0.582196	-5.5628	-0.109664	MYO1E	myosin IE
211864_s_at	0.96593	0.817	0.235595	-5.6966	-0.129308	MYOF	myoferlin
213325_at	0.73837	0.161	1.47856	-4.7565	-0.587351	NECTIN3	nectin cell adhesion molecule 3
216248_s_at	0.29025	0.000997	4.13054	-0.6309	-0.902044	NR4A2	nuclear receptor subfamily 4 group A member 2
211280_s_at	0.92597	0.664	0.444205	-5.6293	-0.0425942	NRF1	nuclear respiratory factor 1
220194_at	0.90198	0.592	-0.54824	-5.5807	0.0639537	NSUN7	NOP2/Sun RNA methyltransferase family member 7
208558_at	0.79755	0.268	-1.15376	-5.1163	0.128281	OR10H1	olfactory receptor family 10 subfamily H member 1
209627_s_at	0.98536	0.905	0.121634	-5.716	-0.0350283	OSBPL3	oxysterol binding protein like 3
200006_at	0.94618	0.746	-0.330709	-5.6709	0.066753	PARK7	Parkinsonism associated deglycase
219891_at	0.8984	0.583	-0.561218	-5.574	0.101838	PGPEP1	pyroglutamyl-peptidase I
200919_at	0.78079	0.238	1.23067	-5.0373	-0.208422	PHC2	polyhomeotic homolog 2
218000_s_at	0.9345	0.698	-0.396423	-5.6482	0.0953732	PHLDA1	pleckstrin homology like domain family A member 1
212235_at	0.95829	0.787	0.275201	-5.6869	-0.0390432	PLXND1	plexin D1
214532_x_at	0.84313	0.389	-0.888996	-5.3556	0.149495	POU5F1B	POU class 5 homeobox 1B
211600_at	0.65833	0.0725	1.94036	-4.1442	-0.631943	PTPRO	protein tyrosine phosphatase, receptor type O
218732_at	0.88591	0.543	0.623819	-5.5394	-0.101686	PTRH2	peptidyl-tRNA hydrolase 2
201222_s_at	0.84416	0.393	0.880461	-5.3624	-0.119835	RAD23B	RAD23 homolog B, nucleotide excision repair protein
209444_at	0.74635	0.173	1.43584	-4.8075	-0.336388	RAP1GDS1	Rap1 GTPase-GDP dissociation stimulator 1
216648_s_at	0.8984	0.583	0.561339	-5.5739	-0.0480179	RREB1	ras responsive element binding protein 1
211162_x_at	0.97201	0.837	0.209833	-5.702	-0.0516592	SCD	stearoyl-CoA desaturase
220232_at	0.61726	0.0496	-2.14691	-3.8413	0.910367	SCD5	stearoyl-CoA desaturase 5
204035_at	0.84222	0.384	0.898796	-5.3477	-0.112166	SCG2	secretogranin II
207302_at	0.95952	0.792	-0.26847	-5.6887	0.0211435	SGCG	sarcoglycan gamma
218041_x_at	0.96703	0.82	-0.231424	-5.6975	0.024792	SLC38A2	solute carrier family 38 member 2
220786_s_at	0.983	0.891	0.140022	-5.7137	-0.0182078	SLC38A4	solute carrier family 38 member 4
220931_at	0.94334	0.73	0.351744	-5.6641	-0.0246408	SMIM2	small integral membrane protein 2
200071_at	0.83051	0.353	-0.960721	-5.296	0.17464	SMNDC1	survival motor neuron domain containing 1
205596_s_at	0.81686	0.313	1.04707	-5.2191	-0.153714	SMURF2	SMAD specific E3 ubiquitin protein ligase 2
206020_at	0.73678	0.157	1.49282	-4.7392	-0.34423	SOCS6	suppressor of cytokine signaling 6
202936_s_at	0.42427	0.00385	3.44978	-1.7389	-0.546073	SOX9	SRY-box 9
214732_at	0.91152	0.619	0.508108	-5.6006	-0.0841924	SP1	Sp1 transcription factor
210942_s_at	0.87441	0.502	0.689168	-5.4996	-0.0553923	ST3GAL6	ST3 beta-galactoside alpha-2,3-sialyltransferase 6
202786_at	0.56479	0.0262	2.48157	-3.3238	-0.458385	STK39	serine/threonine kinase 39
220260_at	0.92412	0.654	0.457344	-5.6237	-0.0924292	TBC1D19	TBC1 domain family member 19
221428_s_at	0.92943	0.678	0.423597	-5.6377	-0.0686227	TBL1XR1	transducin (beta)-like 1 X-linked receptor 1
203313_s_at	0.83878	0.373	0.920271	-5.3301	-0.239873	TGIF1	TGFB induced factor homeobox 1
209937_at	0.84136	0.38	-0.905698	-5.3421	0.786677	TM4SF4	transmembrane 4 L six family member 4
213352_at	0.6652	0.0794	1.89014	-4.2155	-0.453125	TMCC1	transmembrane and coiled-coil domain family 1
212507_at	0.56014	0.0236	2.53657	-3.2363	-0.33793	TMEM131	transmembrane protein 131
207641_at	0.8678	0.478	-0.728604	-5.4738	0.0826636	TNFRSF13B	TNF receptor superfamily member 13B
221371_at	0.81979	0.321	-1.02883	-5.2358	0.127018	TNFSF18	tumor necrosis factor superfamily member 18
222265_at	0.93716	0.709	0.381117	-5.6539	-0.0701887	TNS4	tensin 4
208900_s_at	0.85773	0.435	0.802569	-5.4219	-0.292103	TOP1	topoisomerase (DNA) I
202241_at	0.94675	0.747	0.329062	-5.6714	-0.123221	TRIB1	tribbles pseudokinase 1
217964_at	0.84416	0.393	0.880709	-5.3622	-0.236801	TTC19	tetratricopeptide repeat domain 19
221326_s_at	0.77285	0.214	1.30154	-4.961	-0.250039	TUBD1	tubulin delta 1
208980_s_at	0.92443	0.655	0.455774	-5.6243	-0.0423866	UBC	ubiquitin C
221962_s_at	0.99995	0.999	0.0008869	-5.7231	-0.00011541	UBE2H	ubiquitin conjugating enzyme E2 H
217935_s_at	0.89356	0.57	-0.58141	-5.5632	0.132126	UQCC1	ubiquinol-cytochrome c reductase complex assembly factor 1
204761_at	0.82234	0.331	-1.0068	-5.2557	0.244362	USP6NL	USP6 N-terminal like
213022_s_at	0.96899	0.827	0.222299	-5.6995	-0.0610459	UTRN	utrophin
202172_at	0.6573	0.0721	1.94349	-4.1397	-0.276004	VEZF1	vascular endothelial zinc finger 1
207612_at	0.85986	0.442	-0.79127	-5.4302	0.0669944	WNT8B	Wnt family member 8B
202133_at	0.81956	0.319	1.03381	-5.2312	-0.73211	WWTR1	WW domain containing transcription regulator 1
214032_at	0.99139	0.933	-0.0856731	-5.7196	0.00810523	ZAP70	zeta chain of T cell receptor associated protein kinase 70
203739_at	0.8678	0.481	0.723511	-5.4772	-0.194708	ZNF217	zinc finger protein 217
