# Supplementary material for: Super-enhancers reorganization controls re-sensitization of oxaliplatin-resistant FBXW7-mutated colorectal cancer
Source: Research Square preprint supplement (doi:10.21203/rs.3.rs-4758082/v1), 2024-07-30
Supplement: Supplementary file 6 [file 90a0b44482df469dabcc0f83.xlsx]

## Sheet: Foglio1
STUDY_ID	SAMPLE_ID	HDAC4	HDAC5	MIB2	MDM4	MARCHF2	ZSWIM2	CBLB	TRIM33	RNF6	LRSAM1	UHRF2	TRIM31	MSL2	RFWD3	PIAS4	RNF135	RFFL	LNX1	RNF8	RNF180	TRIM63	TRIM22	BIRC2	SH3RF1	RBCK1	RNF138	MARCHF11	BRAP	TRIM32	RBBP6	SHPRH	TRAF6	MAP3K1	RNF115	RNF34	PDZRN3	FANCL	TOPORS	RNF111	MYLIP	MARCHF1	PDLIM2	MIB1	TRIM41	MARCHF8	TRIM28	SIAH2	MARCHF6
ccle_broad_2019	22RV1_PROSTATE	-3.10881	-0.069036	-0.0492577	NA	NA	NA	-0.881395	-0.557287	3.34163	-0.3201	0.248803	NA	0.731611	-1.14183	-0.760554	-0.576787	-0.53643	NA	NA	NA	NA	-0.321745	-0.959015	-0.735799	-0.323622	0.763461	NA	-0.258941	-1.24514	0.392901	NA	-0.966661	-1.0986	0.585897	0.328657	NA	NA	NA	NA	NA	NA	-0.915336	-0.639002	-0.179247	NA	2.73882	-1.50277	-0.901059
ccle_broad_2019	HSC4_UPPER_AERODIGESTIVE_TRACT	-2.88847	-4.00858	-2.58147	NA	NA	NA	NA	1.08194	2.53974	-1.98222	1.52967	NA	0.915641	0.642415	NA	-3.17403	1.00491	NA	NA	NA	NA	2.44312	-1.87976	-1.78957	-0.48959	NA	NA	-2.00755	-0.381107	0.844569	1.97422	-3.10359	0.336194	-0.714901	-2.69025	-0.878984	NA	1.66843	0.484015	NA	NA	-0.227258	-0.252524	1.08529	NA	-0.706127	NA	0.416789
ccle_broad_2019	KURAMOCHI_OVARY	-2.67661	-0.524207	2.12599	NA	NA	NA	-1.98969	NA	1.02804	-0.0585723	1.21373	NA	0.788823	1.14912	-1.08179	-1.20148	-1.49834	NA	0.00696437	NA	NA	0.468333	-1.52055	-1.27189	-2.1641	-1.13077	NA	-2.54212	0.793196	1.91874	1.27576	-1.7707	-0.340412	-0.253077	-0.492582	NA	NA	1.09905	1.77718	NA	NA	-0.278381	-0.196757	0.549834	NA	0.782416	NA	0.138739
ccle_broad_2019	SAOS2_BONE	-2.49623	1.46298	1.90145	NA	NA	NA	0.899193	NA	NA	-1.9094	1.1388	NA	0.774831	NA	0.374647	-0.361404	-0.323311	NA	NA	NA	NA	-0.8832	-1.49453	-0.713198	-1.55599	0.356985	NA	-2.04375	-1.71784	0.323284	1.09358	-1.59372	0.0940488	0.202918	-1.07992	NA	0.830515	0.568993	NA	NA	NA	-1.62851	1.09557	0.125203	NA	-0.441769	1.11129	0.343838
ccle_broad_2019	LN18_CENTRAL_NERVOUS_SYSTEM	-2.37193	-0.812764	0.698683	-1.05659	NA	NA	-0.339365	NA	-0.0549288	-0.668815	-0.253853	NA	-1.3624	NA	0.919112	NA	1.34928	NA	NA	NA	-2.05616	-0.0674745	0.126666	0.172524	0.716315	-0.335664	NA	0.135252	0.222454	-0.210946	NA	0.212055	-0.0275355	0.693349	0.0160425	NA	NA	0.838365	NA	NA	NA	-0.0680953	0.548884	0.248145	NA	-0.370744	0.116352	0.0890335
ccle_broad_2019	EBC1_LUNG	-2.15005	-1.3175	-1.16334	NA	NA	NA	-1.15241	0.782151	NA	-0.81209	0.317174	-0.178118	1.6739	0.674651	-0.214953	NA	0.915067	NA	NA	NA	-0.531849	NA	-0.712603	-0.195017	-1.24527	-0.628768	NA	-0.232287	-1.61449	1.46322	-0.362291	-1.33565	-0.954271	NA	-0.495743	-1.72222	-1.34513	0.800429	NA	NA	NA	-0.63037	-0.844223	-0.0773645	NA	-1.1325	NA	0.45538
ccle_broad_2019	8305C_THYROID	-2.07957	-1.55724	2.16945	-1.03682	NA	NA	-1.25776	NA	-1.93391	-0.103137	1.66802	NA	-1.47656	NA	0.205468	NA	0.887239	NA	NA	NA	-0.840169	0.743945	0.18849	-0.629694	-0.49615	-1.87714	NA	-2.033	0.909587	-0.604095	NA	-0.561485	-1.77897	-2.47806	-2.24369	NA	NA	0.0716907	NA	NA	NA	-0.691848	-0.847029	-0.1071	NA	-1.21978	-0.551763	0.812386
ccle_broad_2019	NIHOVCAR3_OVARY	-2.04785	-0.339348	1.06991	NA	NA	NA	0.485864	NA	NA	-0.268788	1.3799	NA	0.681632	NA	0.893278	-0.468687	-0.0347947	NA	NA	NA	NA	-0.0109675	-1.65989	0.126579	-1.45703	-0.303708	NA	-0.743609	-0.56743	0.247832	-0.554652	-1.70593	-0.123389	-0.964059	-0.118477	NA	-0.631318	-0.155511	NA	NA	NA	-0.203409	-0.216219	1.79016	NA	1.32879	-1.41417	0.729702
ccle_broad_2019	HCC1806_BREAST	-2.03176	-1.2435	0.729381	NA	NA	NA	0.506278	-0.0135597	2.35486	-1.49448	0.251695	NA	0.467541	0.582447	2.01707	NA	1.53436	NA	-0.722261	NA	NA	-0.199977	-1.98752	-0.385186	-1.52362	-1.49819	NA	-1.58524	-0.90195	0.786706	1.0858	0.642719	0.169892	-0.931829	-0.453865	NA	NA	1.36198	NA	NA	NA	0.153958	0.500833	0.257316	NA	3.03621	-1.66436	1.66973
ccle_broad_2019	HUH6_LIVER	-2.01041	-0.515778	1.4035	NA	NA	NA	-1.06779	1.11915	NA	-1.35601	0.879976	NA	0.180696	NA	-0.886885	NA	1.38698	0.594242	NA	NA	NA	-0.457146	-2.36057	-1.37992	-1.63626	-0.910417	NA	-1.3208	-2.05582	1.79661	-0.801913	NA	-0.751732	-0.264403	-0.0626115	0.0946693	NA	-0.891786	0.623056	NA	NA	-1.28884	0.258685	0.0133824	NA	1.40052	NA	-0.947341
ccle_broad_2019	OVCAR8_OVARY	-1.93936	0.386836	0.470602	NA	NA	NA	-1.71828	0.649267	-0.977145	0.339932	-1.48813	NA	-0.487118	-0.284572	-0.364276	-0.427161	-0.180338	NA	NA	NA	NA	-0.0838748	0.97019	0.93599	-0.206744	0.0481214	NA	1.23308	1.09617	-0.630361	NA	0.547316	-0.121039	0.00708452	0.468696	NA	NA	NA	NA	NA	NA	0.0910697	0.106308	0.0264604	NA	-0.0232695	1.39007	-0.755476
ccle_broad_2019	MKN7_STOMACH	-1.86157	-2.16105	0.378993	NA	NA	NA	-0.817244	-0.19767	NA	-0.278411	0.0972369	-2.07107	NA	NA	NA	-1.38414	0.135128	NA	NA	NA	NA	-0.0963506	-0.711088	-3.70237	-1.36068	NA	NA	0.0733994	0.701623	0.676064	1.36586	-0.744642	NA	NA	-0.418872	NA	NA	0.0440999	NA	NA	NA	-0.27547	0.799594	1.68663	NA	-1.04834	NA	0.683294
ccle_broad_2019	SCC25_UPPER_AERODIGESTIVE_TRACT	-1.78686	-1.3213	1.21538	NA	NA	NA	NA	-0.197108	-0.218989	-1.06334	1.21344	NA	-0.471523	NA	1.24108	NA	0.0235122	NA	NA	NA	NA	2.18355	-1.57503	-0.935468	-1.57472	-1.79127	NA	-2.63172	1.95051	-0.620438	NA	-0.771888	NA	NA	-1.18462	NA	NA	NA	0.255611	NA	NA	0.0819381	1.62122	NA	NA	-1.39395	NA	2.82157
ccle_broad_2019	BXPC3_PANCREAS	-1.7789	-0.331476	0.253596	NA	NA	NA	NA	1.67801	NA	-1.43744	-0.467032	NA	0.886832	NA	-0.244973	-0.947385	0.0173621	NA	NA	NA	-0.367823	0.717046	0.278689	0.23693	0.116581	0.256945	NA	0.222875	1.45815	1.42322	NA	0.726419	0.934562	NA	-0.0658183	0.177903	NA	-0.106398	NA	NA	NA	1.66494	1.43148	-0.944971	NA	1.48489	-0.362572	0.799461
ccle_broad_2019	NCIH460_LUNG	-1.76745	-3.39366	-0.470111	NA	NA	NA	-0.785773	1.69941	NA	-0.0500523	2.1243	NA	-0.0437252	0.110172	-1.50077	-0.562964	-3.07174	NA	NA	NA	NA	-0.849627	-0.128574	-3.82223	0.177226	-0.105385	NA	-1.21473	-1.09565	0.294051	-0.765291	-1.58207	-2.65468	0.51764	1.14197	NA	NA	0.208507	NA	NA	NA	-1.22251	0.848691	1.92049	NA	-0.0717421	0.32947	-1.2558
ccle_broad_2019	BICR22_UPPER_AERODIGESTIVE_TRACT	-1.74835	-0.870345	0.355858	NA	NA	NA	-0.329457	0.913086	1.75282	0.251557	0.033831	NA	0.257491	0.671557	-0.917658	NA	0.811315	NA	-0.103557	NA	NA	2.32939	-1.06789	0.01237	-1.30741	-0.110477	NA	-0.601077	1.46829	0.88864	0.292876	-0.097714	-0.142839	-1.94639	-1.38361	NA	NA	1.40084	NA	NA	NA	0.313713	1.3482	0.480572	NA	-0.692801	1.82116	0.963218
ccle_broad_2019	PANC0203_PANCREAS	-1.70912	-0.952685	-1.39018	NA	NA	NA	NA	NA	NA	-0.676911	0.456489	NA	-0.941453	0.167081	0.558029	NA	1.73295	NA	NA	NA	NA	0.403035	-1.79104	-0.721446	-0.720974	-1.12415	NA	0.740774	0.284675	0.771828	NA	-1.06433	NA	NA	-1.80115	NA	NA	NA	NA	NA	NA	-0.422378	0.310574	NA	NA	0.595197	-0.799347	0.307966
ccle_broad_2019	U118MG_CENTRAL_NERVOUS_SYSTEM	-1.70612	0.23217	1.30943	-0.931216	NA	NA	0.193249	NA	NA	-0.444214	1.42254	NA	-0.550128	-0.769109	0.124782	NA	0.1092	0.835568	NA	NA	NA	1.20218	-0.457218	-0.651626	0.101958	-0.609088	NA	-0.455759	0.707085	-0.587695	-0.541476	-1.89134	-1.42148	-0.422095	-1.68921	1.82475	-1.70762	NA	NA	NA	NA	-1.80732	-0.173291	-0.246634	NA	-0.788775	NA	0.0280708
ccle_broad_2019	SUDHL4_HAEMATOPOIETIC_AND_LYMPHOID_TISSUE	-1.68306	1.69554	-0.529179	2.21736	NA	NA	0.96664	NA	NA	0.322919	-1.1596	NA	1.39142	-0.559017	0.412682	NA	-0.986019	-1.14157	NA	NA	NA	1.75927	0.903949	-2.01447	1.0056	2.14385	NA	2.0177	0.950081	0.755963	-1.28441	0.352878	1.26794	0.711584	0.917918	2.28575	-1.97785	NA	NA	NA	NA	1.96526	-0.0809172	0.51155	NA	-0.380908	NA	-1.84546
ccle_broad_2019	T24_URINARY_TRACT	-1.61498	-1.0234	-1.18339	NA	NA	NA	NA	0.526288	-0.75834	1.5866	-0.353391	NA	-0.724615	NA	0.814981	NA	0.315492	NA	NA	NA	NA	1.38928	0.743051	0.869633	1.33507	0.213383	NA	0.571179	0.976321	-1.23896	NA	1.18372	NA	NA	0.61679	NA	NA	NA	0.0351998	NA	NA	0.779359	-0.240868	NA	NA	-2.04911	NA	0.0782129
ccle_broad_2019	HCC1937_BREAST	-1.60733	0.0519342	NA	NA	NA	NA	-0.0722493	1.55029	0.701879	-1.4517	-0.377931	NA	0.909126	0.457993	NA	NA	NA	NA	NA	NA	NA	1.02672	-0.722186	-0.00334737	0.237261	0.806708	NA	-0.242424	0.978421	0.34894	-0.882538	-0.157081	NA	NA	-0.381787	NA	NA	2.47785	NA	NA	NA	0.874763	0.0935861	0.0163557	NA	2.37841	NA	0.919064
ccle_broad_2019	LNCAPCLONEFGC_PROSTATE	-1.57184	-1.66068	-0.655794	0.390388	NA	NA	-0.882893	NA	2.49548	1.80485	0.155769	NA	-0.21212	NA	-0.337587	NA	-0.175166	NA	NA	NA	-0.756331	-0.842715	-0.463292	0.30659	-0.795243	0.312066	NA	0.472691	-0.449576	1.41426	NA	-1.39818	-0.540233	0.121523	0.50665	NA	NA	0.206634	NA	NA	NA	0.065039	-1.21973	-0.530262	NA	0.81642	1.52057	0.770087
ccle_broad_2019	SNU423_LIVER	-1.51881	-0.935459	1.48678	NA	NA	NA	NA	NA	NA	1.61939	0.0466757	NA	0.598739	1.12044	0.731477	NA	0.265005	NA	NA	NA	NA	-0.145709	0.17195	-0.945857	-0.485131	-0.593252	NA	-0.396009	0.924835	-1.03314	NA	0.219015	NA	NA	-0.654323	NA	NA	NA	NA	NA	NA	-1.22862	0.790951	NA	NA	-0.769247	0.697955	-0.0172096
ccle_broad_2019	UBLC1_URINARY_TRACT	-1.47443	-0.719439	-0.892238	NA	NA	NA	-0.628189	NA	0.446497	-0.787457	2.69609	NA	-0.591218	2.10008	1.01721	-0.238558	0.746156	NA	1.31726	NA	NA	2.29916	-0.585141	-0.290785	-1.05241	0.754917	NA	-0.795042	-0.302178	1.34136	2.27715	-1.1999	-0.0740179	-0.183384	-0.388389	NA	NA	1.59196	0.743988	NA	NA	-0.643371	2.08584	0.27999	NA	0.45861	NA	2.59529
ccle_broad_2019	HEC251_ENDOMETRIUM	-1.42091	-0.806417	-1.27755	NA	NA	NA	NA	1.06239	NA	-1.60373	-0.812467	NA	1.13061	NA	-0.415946	-1.82977	-0.533393	NA	NA	NA	-0.329366	-1.24566	-2.90102	-0.692342	-2.71616	-0.0713009	NA	-2.32473	0.0559579	0.365241	NA	-0.832644	-0.118843	NA	0.288438	0.100824	NA	0.278926	NA	NA	NA	-0.896715	-0.638616	1.69039	NA	-0.286602	-0.862551	0.391946
ccle_broad_2019	TE11_OESOPHAGUS	-1.41821	0.280664	0.705888	NA	NA	NA	NA	-0.0531838	0.390219	-1.00093	-0.00551507	NA	0.599793	1.79026	NA	-0.383805	0.442469	NA	NA	NA	NA	-0.0192725	-1.04493	-0.524761	0.600888	NA	NA	1.22671	-0.546679	0.726147	0.00326485	0.207573	0.868788	-0.232762	-0.252841	-0.488419	NA	0.764307	1.38681	NA	NA	1.72075	-0.293419	1.38906	NA	-1.17763	NA	-0.0864716
ccle_broad_2019	T47D_BREAST	-1.39437	0.47442	-0.772186	NA	NA	NA	-0.562304	0.107008	-1.6865	2.34297	-0.270524	NA	-0.562091	-0.0319165	NA	NA	-0.324919	1.07108	NA	NA	NA	-0.5315	1.36893	-0.319323	-0.193413	-0.643416	NA	0.569378	0.300392	0.0142716	0.156723	0.962639	NA	NA	0.131667	NA	NA	-1.43157	NA	NA	NA	0.288773	-0.0512397	-0.196446	NA	-0.920823	0.837912	-0.313102
ccle_broad_2019	KNS81_CENTRAL_NERVOUS_SYSTEM	-1.38111	-0.761417	NA	NA	NA	NA	-0.579194	-0.388978	0.629217	-0.506656	-0.121562	-0.407057	-2.55298	NA	-0.52883	NA	0.152764	NA	NA	NA	NA	2.41016	-1.34689	-1.47629	-1.81029	-2.40963	NA	-2.1016	1.36819	-1.5176	NA	-0.618351	NA	NA	-1.0298	NA	NA	NA	NA	NA	NA	-0.846252	2.50421	-0.0995371	NA	-0.762982	-1.94682	2.20758
ccle_broad_2019	SNU449_LIVER	-1.36466	-0.0500781	NA	NA	NA	NA	NA	0.236327	-0.522712	1.14415	0.020049	NA	-0.467244	NA	NA	NA	NA	NA	NA	NA	NA	-1.62202	1.49856	0.459164	0.387363	-0.659381	NA	-0.501038	1.1455	-0.643322	NA	-0.709269	NA	NA	NA	NA	NA	NA	-0.620879	NA	NA	1.32697	1.30911	NA	NA	0.256279	NA	-0.637118
ccle_broad_2019	SQ1_LUNG	-1.29479	-0.306222	-0.882216	NA	NA	NA	-0.0451079	0.838228	-1.21568	-1.03518	-0.858305	NA	0.491885	-0.228508	-0.914579	NA	1.55352	NA	0.0582024	NA	NA	-0.11034	-0.903248	0.579014	-1.25357	-0.918294	NA	-1.46968	-2.14956	0.10067	-0.668242	-2.72709	-0.239487	0.183487	0.657544	NA	NA	0.0289039	NA	NA	NA	1.28898	-0.465639	0.383914	NA	-1.59853	-0.949079	0.612711
ccle_broad_2019	OSRC2_KIDNEY	-1.2198	-1.74777	-1.85001	NA	NA	NA	-0.370128	-0.898969	NA	0.528997	-2.0344	NA	-2.27987	NA	-1.41351	NA	0.456663	-1.13617	NA	NA	NA	2.17565	1.04705	1.73834	2.97561	0.256594	NA	0.0295748	-0.740854	-1.55687	-0.664986	NA	-0.291068	0.632676	0.378144	-0.924177	NA	-1.23238	-0.909041	NA	NA	1.04682	0.0853255	-1.65835	NA	-1.72692	NA	-0.0820727
ccle_broad_2019	HEC108_ENDOMETRIUM	-1.20587	-0.621901	NA	NA	NA	NA	NA	0.878041	0.587181	-0.714946	0.274757	NA	-0.510096	NA	NA	NA	NA	NA	NA	NA	NA	-1.2882	-1.38666	-1.37133	-2.01431	-0.312834	NA	-1.62375	1.02763	1.88396	NA	-0.700045	NA	NA	NA	NA	NA	NA	-0.458531	NA	NA	-0.802858	0.180384	NA	NA	1.08083	NA	-0.460082
ccle_broad_2019	MDAMB231_BREAST	-1.20383	-0.761233	-0.265125	NA	NA	NA	1.10592	NA	NA	0.522271	-1.72702	NA	-1.58018	NA	-0.29098	-0.0463507	0.735911	NA	NA	NA	NA	-0.608372	1.65187	1.16806	0.210372	-1.08668	NA	-0.0461982	0.60342	-1.3501	-1.33919	0.356015	0.412315	0.298831	0.254076	-0.531703	NA	NA	-1.14495	NA	NA	1.54732	1.58072	-3.62965	NA	-1.78513	-0.246561	NA
ccle_broad_2019	G401_SOFT_TISSUE	-1.19226	0.214224	0.577399	NA	NA	NA	-2.22164	0.315461	NA	0.0854284	1.29222	-0.097249	0.503866	0.212564	1.65609	-1.66202	-0.904762	NA	NA	NA	NA	-1.09822	-0.294392	-3.82049	-1.49602	0.969358	NA	-0.0550092	-0.279176	1.80557	-0.181312	-1.21177	-0.531088	NA	-0.310992	NA	-0.396344	-0.607346	NA	NA	NA	-0.456013	-0.648294	0.817912	NA	1.46429	-0.012014	-0.291843
ccle_broad_2019	NCIH1793_LUNG	-1.16003	0.353731	0.430159	NA	NA	NA	0.440098	-0.681606	NA	0.468603	-0.511774	0.361371	NA	NA	NA	-0.262821	0.550896	NA	NA	NA	NA	-0.529417	0.976752	0.646477	0.13149	NA	NA	0.335794	0.916389	-1.88166	-1.14357	0.0309664	NA	NA	-3.0719	NA	NA	-1.22957	NA	NA	NA	1.93002	-0.209325	-1.92087	NA	-0.411188	NA	0.846599
ccle_broad_2019	HEC6_ENDOMETRIUM	-1.13669	-1.72927	0.115146	0.651322	NA	NA	-0.317173	0.833	-0.655295	-0.186422	0.166891	NA	-0.0462303	NA	1.25778	-0.0988843	1.15559	NA	NA	NA	NA	-0.637287	-0.0233592	-0.45639	-4.0145	0.631866	NA	-0.000327175	0.853519	-0.182474	-0.1218	1.79892	NA	1.09658	0.560635	NA	NA	NA	-0.511941	NA	NA	-1.66806	0.298499	-0.665544	NA	-0.623329	0.267545	0.885026
ccle_broad_2019	NUGC3_STOMACH	-1.10963	-0.748838	0.698048	-0.912447	NA	NA	-0.853661	NA	1.01867	-0.581879	0.786555	NA	0.338211	-2.04731	-0.217039	-0.125587	0.466817	NA	NA	NA	NA	-0.280207	0.802651	0.89493	-0.597551	-0.320034	NA	-1.32138	0.894522	-0.294138	2.02279	-1.10395	0.330583	0.0288891	-0.558007	-0.422027	1.53014	0.107327	1.94525	NA	NA	3.12941	1.13171	0.0731748	NA	0.767611	NA	1.01478
ccle_broad_2019	SNU1079_BILIARY_TRACT	-1.10825	-0.15657	-0.680222	NA	NA	NA	NA	NA	NA	-0.0110731	0.754445	NA	0.81075	0.338079	0.823052	NA	0.301219	NA	NA	NA	NA	0.10275	-0.0291497	0.103541	0.305686	-0.353497	NA	-0.421837	-0.103591	0.473542	NA	-0.999548	NA	NA	-0.327627	NA	NA	NA	NA	NA	NA	-0.340436	0.674118	NA	NA	0.435293	0.27073	0.0178855
ccle_broad_2019	A101D_SKIN	-1.10788	-1.55961	0.816963	-1.41543	NA	NA	-0.950364	1.74243	0.562771	-0.739671	-0.669634	NA	-0.0171914	NA	-0.295146	NA	NA	NA	NA	NA	NA	NA	-0.179129	-0.377685	-0.596581	-0.71438	NA	-0.6732	0.593675	0.0151636	NA	-0.99986	-0.324845	-0.925909	-0.354055	0.416367	NA	NA	NA	NA	NA	-0.390598	0.937768	0.868829	NA	0.148305	NA	0.747181
ccle_broad_2019	LOXIMVI_SKIN	-1.09214	-0.0889909	-2.45298	NA	NA	NA	-0.724139	1.03785	1.79842	0.554398	0.192622	NA	0.193103	1.12784	-0.0172275	NA	-0.349956	NA	NA	NA	NA	1.2776	0.851252	0.570399	0.133666	1.26199	NA	0.83617	1.19771	0.640927	-0.700858	1.50949	0.884979	NA	0.494133	NA	NA	-0.0571004	NA	NA	NA	-1.17867	1.26265	1.60685	NA	0.207239	0.168749	-1.10037
ccle_broad_2019	HLF_LIVER	-1.05151	-0.115959	NA	NA	NA	NA	-0.00807891	-0.743386	0.099151	-0.400451	-0.0936615	-0.491274	-1.06857	NA	-0.38855	NA	0.897065	-0.48033	NA	NA	-0.217457	NA	-1.09592	-0.21843	-0.241941	-0.0564124	NA	-1.02961	-0.781906	0.171298	-0.483652	-0.688301	NA	-0.177164	NA	NA	0.291555	0.208636	NA	NA	NA	-0.680715	0.371475	0.697979	NA	-0.0675595	-1.35399	0.0920626
ccle_broad_2019	HT1197_URINARY_TRACT	-1.04863	-1.1956	0.302775	NA	NA	NA	-0.361202	0.686503	NA	-1.15599	0.379014	NA	0.803275	NA	-0.882172	NA	-0.331553	NA	NA	NA	-0.150314	NA	-1.30368	-0.277306	0.0352617	0.65452	NA	0.145148	-0.268965	0.812247	-0.335656	-0.821034	0.508627	NA	-5.93756	NA	-0.232403	0.499239	NA	NA	NA	0.95121	-0.902695	0.167313	NA	0.331366	-0.407247	1.17638
ccle_broad_2019	NCIH1437_LUNG	-1.0477	-0.731135	NA	NA	NA	NA	0.0737574	1.25151	-0.431791	-0.737163	-1.47636	NA	0.391924	0.230038	NA	NA	NA	NA	NA	NA	NA	-0.405974	-1.36438	-0.614637	-0.62427	-1.32694	NA	-0.571535	-1.06015	-0.0836991	0.0926238	-1.91121	NA	NA	-0.846464	NA	NA	2.061	NA	NA	NA	-0.754041	0.0303824	-0.431454	NA	-0.871441	NA	0.119452
ccle_broad_2019	SU8686_PANCREAS	-1.04693	-0.311971	0.291568	NA	NA	NA	-0.316788	-0.189359	0.670541	-0.806306	-0.0753031	NA	0.325706	-0.0120114	NA	-0.414739	0.820556	0.501682	NA	NA	NA	0.55961	-1.22179	-0.0964954	-0.320554	-1.68339	NA	-1.36802	0.913078	0.888387	0.102251	-0.909701	-0.799358	NA	-1.80249	NA	-1.86911	-0.549607	0.485082	NA	NA	0.0497473	0.553483	0.78186	NA	-0.628489	-0.764576	0.810951
ccle_broad_2019	EFM19_BREAST	-1.01539	0.470109	0.462882	NA	NA	NA	-0.11682	2.17771	NA	1.50245	-0.98241	NA	1.30054	-1.12003	1.11551	-0.599603	0.39432	NA	NA	NA	NA	-0.222118	0.0354861	-0.0679009	-0.187469	0.955741	NA	2.11638	2.27964	0.379039	0.648001	-0.914698	-3.46861	0.638614	0.69317	NA	NA	0.392718	NA	NA	NA	-0.536656	0.442307	0.777215	NA	0.105208	0.137972	1.41245
ccle_broad_2019	NCIH522_LUNG	-1.00717	-0.0328274	-0.543767	NA	NA	NA	0.0518981	-0.764475	NA	-0.501365	-0.791863	NA	0.932163	-1.01166	0.401454	-0.871666	0.529219	NA	NA	NA	NA	-0.282758	-0.150247	-0.126641	-0.474427	1.38021	NA	-1.22574	-0.460499	1.87798	0.480615	0.0776684	3.20243	-0.143328	-0.675991	NA	NA	0.849099	NA	NA	NA	-1.55459	0.0230041	0.378724	NA	-0.671892	-0.261049	-0.672289
ccle_broad_2019	CAL120_BREAST	-1.00136	-1.92149	0.167095	NA	NA	NA	-1.20439	-0.234667	NA	1.04595	-0.152353	0.121845	0.411607	0.855251	-0.232301	0.123664	-0.036079	NA	NA	NA	NA	-0.411627	-0.0760732	1.61945	0.53266	-0.0174664	NA	-0.370206	0.993225	-1.99171	-0.377834	-0.195893	-0.12621	NA	0.432369	NA	0.548184	-1.09132	NA	NA	NA	-0.206395	0.516808	0.355216	NA	0.653056	0.353603	1.60127
ccle_broad_2019	NCIH292_LUNG	-0.991186	-0.719107	-0.148256	-0.419538	NA	NA	-1.28007	-1.30828	0.696372	-0.975228	1.94188	NA	0.382437	0.317457	4.05588	0.793229	0.315067	NA	-0.447788	NA	NA	1.27084	0.505434	0.122703	-1.76444	-0.656113	NA	-0.922032	1.53872	-0.139992	NA	0.00963284	NA	NA	0.926847	NA	NA	1.46641	NA	NA	NA	0.451898	2.33761	1.42874	NA	0.19349	0.89868	2.61817
ccle_broad_2019	HCC56_LARGE_INTESTINE	-0.975204	NA	-1.09446	NA	NA	NA	0.797007	NA	NA	0.025311	-0.0344636	NA	0.186614	NA	NA	-0.430638	-1.23318	NA	NA	NA	NA	-0.47534	-0.480644	-0.709837	-0.58455	-0.053577	NA	0.0571546	-0.171716	-0.697231	-2.20229	0.0825061	NA	NA	-2.13183	NA	NA	0.0616326	NA	NA	NA	-0.400455	-2.74917	-0.724644	NA	1.04239	NA	-0.377569
ccle_broad_2019	SNU1_STOMACH	-0.94475	0.326365	1.58738	NA	NA	NA	0.388201	-0.388761	NA	-0.372269	1.12063	NA	-0.551243	NA	-0.612276	NA	-1.03602	-1.0425	NA	NA	NA	0.14848	-0.700419	-0.705576	0.188733	1.00405	NA	-0.516254	0.733285	-0.530687	0.258235	NA	-0.269272	-1.38221	-1.09319	0.0398142	NA	0.756753	-0.591272	NA	NA	-0.0758695	-0.845019	-0.18548	NA	-1.19874	NA	-1.23501
ccle_broad_2019	TE10_OESOPHAGUS	-0.914276	0.824683	NA	NA	NA	NA	-1.29737	0.155202	-0.0161975	-3.63128	0.962029	-0.26942	-1.61261	NA	0.489981	NA	0.426444	NA	NA	NA	NA	-1.52678	-2.8545	-1.11395	-1.71746	-0.210034	NA	-2.7066	0.321035	0.40435	NA	-1.55577	NA	NA	0.0779787	NA	NA	NA	NA	NA	NA	1.34067	0.698121	1.41194	NA	-1.24941	-0.800002	2.12817
ccle_broad_2019	HCC827_LUNG	-0.880193	NA	NA	NA	NA	NA	NA	NA	NA	-0.155149	-0.99718	NA	NA	NA	-1.05388	NA	0.351061	NA	NA	NA	NA	1.71154	-0.537573	0.218777	1.97456	NA	NA	-0.205951	1.34893	-0.108501	0.0718841	NA	NA	NA	0.393824	NA	-0.764793	-0.390644	NA	NA	NA	-0.0712125	0.565208	NA	NA	1.58591	NA	0.607515
ccle_broad_2019	AU565_BREAST	-0.866775	1.26074	-0.819173	NA	NA	NA	-1.15515	-0.0848674	NA	0.983006	-0.297008	NA	NA	NA	-0.152464	NA	-0.883185	NA	NA	NA	0.402721	NA	-0.782399	0.0343542	-0.0783381	-0.886912	NA	-0.0843729	-1.16946	-0.394189	0.398514	-0.336569	0.130262	-0.0902284	0.0530731	NA	1.32228	NA	NA	NA	NA	1.24629	-0.753756	-0.611426	NA	0.350922	NA	-0.361415
ccle_broad_2019	SNU61_LARGE_INTESTINE	-0.847195	0.783579	-2.10258	NA	NA	NA	0.84697	-0.77737	0.269092	-0.933899	0.359073	NA	1.10257	1.12154	NA	0.518817	0.32381	0.400894	NA	NA	NA	0.606481	0.433436	0.423676	0.701649	-0.0503793	NA	-0.418115	-0.343054	1.34247	0.594088	-0.387548	-0.331843	NA	0.638899	NA	-0.364428	-1.06286	0.549753	NA	NA	0.151263	-1.10888	0.344413	NA	0.132899	-0.502074	0.415733
ccle_broad_2019	HEC265_ENDOMETRIUM	-0.842097	-0.595744	-0.1227	NA	NA	NA	NA	-1.47375	2.59609	-1.04478	2.21952	NA	0.674075	NA	0.94772	NA	0.922865	NA	NA	NA	NA	-0.177581	-0.858775	-0.465679	-1.62806	0.171409	NA	-1.41465	-0.803983	0.927066	NA	-1.10935	NA	NA	-0.218052	NA	NA	NA	0.305607	NA	NA	0.859451	0.528297	NA	NA	-0.7398	NA	1.29714
ccle_broad_2019	BICR6_UPPER_AERODIGESTIVE_TRACT	-0.840894	-0.316815	-0.707131	NA	NA	NA	NA	-1.27097	NA	-0.827788	0.394931	NA	1.44848	-0.283924	NA	-0.417568	-1.04205	NA	NA	NA	0.108955	NA	-1.31667	NA	-0.860464	0.0578166	NA	-1.60341	-0.422398	0.79334	0.25244	-0.375481	-0.580679	-0.76102	0.207718	NA	NA	NA	NA	NA	NA	-0.337686	-1.17978	0.458509	NA	-0.704684	NA	1.55223
ccle_broad_2019	JHH7_LIVER	-0.82992	0.258477	-0.853169	NA	NA	NA	-0.556866	-0.733473	NA	-0.663916	0.165653	0.91421	0.0373809	0.354972	1.55976	NA	0.552817	NA	NA	NA	-0.768615	NA	-0.422971	0.0573139	-0.485389	0.636627	NA	-0.948121	-1.72679	0.234105	3.0631	0.12765	1.11809	NA	-0.08897	0.373927	0.936057	0.345903	NA	NA	NA	-0.527108	0.45197	0.649276	NA	0.574098	NA	0.452196
ccle_broad_2019	OV56_OVARY	-0.829079	-2.27541	-1.0046	-0.835473	NA	NA	-0.0920767	-0.128733	-0.375507	-0.0565022	0.531117	NA	-0.340794	NA	-0.596467	-0.159587	1.02232	NA	NA	NA	NA	1.34996	-1.07075	0.148631	2.37379	-2.35686	NA	-0.534012	-0.812585	-0.441345	-0.477913	-1.03801	NA	-1.18744	-1.38192	NA	NA	NA	-0.398043	NA	NA	1.19439	-1.05014	-1.07988	NA	-0.626394	0.110974	0.0843547
ccle_broad_2019	HEYA8_OVARY	-0.820245	-1.19532	-0.067172	NA	NA	NA	-1.1418	NA	NA	0.477591	0.404417	NA	0.0560724	NA	-1.58669	0.454492	-0.135829	NA	NA	NA	NA	1.12555	1.49698	1.67783	-0.714944	0.300856	NA	0.938912	1.26523	-1.55197	-0.581947	-0.0473923	0.0703881	-0.00515816	-0.113889	-0.343974	NA	NA	0.662037	NA	NA	1.42686	-0.589918	0.0746122	NA	-0.84445	-0.201909	NA
ccle_broad_2019	LCLC103H_LUNG	-0.811422	0.278938	0.364765	NA	NA	NA	-0.182447	-0.338222	0.415635	0.314524	1.14684	NA	-0.72094	0.898053	-0.647968	NA	-1.35804	NA	NA	NA	NA	0.653858	0.311422	0.645913	-0.28593	0.196399	NA	1.28483	0.28559	-0.246894	-0.169861	0.411287	-0.135383	NA	0.349236	NA	NA	0.481883	NA	NA	NA	-0.223042	0.954224	-0.227197	NA	-0.23106	2.14041	-0.218156
ccle_broad_2019	CFPAC1_PANCREAS	-0.80673	-0.0834581	NA	NA	NA	NA	-0.955817	-0.582447	-0.936726	-1.82334	-0.397165	NA	0.285823	0.360165	NA	-0.32239	1.40046	NA	NA	NA	NA	1.71836	-1.13109	-0.0773556	0.215607	0.755623	NA	-1.47331	-0.670038	0.0595578	-0.706079	-1.79484	0.770433	NA	-0.555112	NA	NA	-1.47466	0.167326	NA	NA	0.170859	-0.316349	-0.809145	NA	0.197205	-0.91007	0.881434
ccle_broad_2019	A704_KIDNEY	-0.803076	-0.963899	0.142804	NA	NA	NA	-0.898509	-1.21828	NA	-0.0284957	-2.93137	NA	-1.93716	NA	-0.851127	NA	0.646621	NA	NA	NA	NA	1.03771	-0.284604	-0.144904	0.313773	-1.29655	NA	-0.500044	-1.93184	-1.99007	NA	-0.574413	NA	-0.467812	-1.04641	NA	NA	-1.25697	NA	NA	NA	2.16336	-1.73044	-0.403668	NA	-1.18083	-0.523351	-0.0451052
ccle_broad_2019	K562_HAEMATOPOIETIC_AND_LYMPHOID_TISSUE	-0.785507	0.465368	0.718904	0.0730915	NA	NA	-0.290133	NA	-1.49832	0.563598	-1.21676	NA	-0.514466	0.368613	0.248535	-0.135163	-0.479979	NA	NA	NA	NA	-0.239769	0.557349	-4.10654	-0.0101237	0.0724253	NA	1.74588	-1.20118	1.08392	0.605872	1.0027	-0.222349	0.112005	0.139555	-2.8216	1.00653	-0.309364	-0.475312	NA	NA	-2.252	-0.672584	-0.0871016	NA	0.753914	NA	-0.611217
ccle_broad_2019	NCIH441_LUNG	-0.785086	0.718511	0.338131	NA	NA	NA	1.29182	NA	-2.29682	-0.0664418	-1.52388	NA	-1.1875	-0.509987	0.440768	1.12406	0.678878	NA	-1.14905	NA	NA	-0.534312	-0.410075	0.862029	-0.769377	-0.437001	NA	0.781844	0.254785	-1.35534	-1.95146	0.280251	0.610255	-1.11158	0.578988	NA	NA	-0.587175	-1.56926	NA	NA	-0.242506	-0.13296	0.482811	NA	-1.30845	NA	-0.562828
ccle_broad_2019	KU1919_URINARY_TRACT	-0.784879	-0.526797	0.16697	-1.52612	NA	NA	-2.22187	1.87996	0.722609	-0.983372	2.02957	NA	0.0937358	1.82691	5.10787	-1.31192	1.0612	NA	-1.782	NA	NA	-0.595306	-2.73032	-1.07727	-2.5103	-0.499811	NA	-1.77862	-0.185557	1.24089	NA	-2.45416	NA	NA	-2.18872	NA	NA	1.1896	NA	NA	NA	-0.658575	0.740048	1.35849	NA	-0.366456	0.177605	1.9085
ccle_broad_2019	SNU119_OVARY	-0.77802	-0.171275	NA	NA	NA	NA	-1.25427	-3.38195	1.11841	-1.76591	1.26743	NA	-0.290413	1.05621	NA	-0.926224	-0.228524	NA	NA	NA	NA	-1.43621	-1.20306	-0.157196	-2.51866	-0.331762	NA	-3.4645	-0.532823	-0.942089	-2.88509	-1.27754	-0.809838	NA	0.32449	NA	NA	0.243728	-2.01448	NA	NA	-0.0639187	-0.161126	0.984818	NA	-0.668824	1.36715	0.130417
ccle_broad_2019	KARPAS422_HAEMATOPOIETIC_AND_LYMPHOID_TISSUE	-0.777113	0.0591098	-0.725782	NA	NA	NA	5.90753	0.451994	NA	0.337365	-1.3103	-0.176857	1.02949	-1.96211	-0.192828	-0.0891467	1.44629	NA	NA	NA	NA	1.5315	1.3318	-2.69045	2.30769	0.888926	NA	-0.199936	-1.18865	1.33645	2.08003	0.65509	1.48264	NA	0.817528	NA	0.0647747	-0.599077	NA	NA	NA	1.23411	-1.05929	-0.365444	NA	-0.510603	1.0035	-1.67943
ccle_broad_2019	RH41_SOFT_TISSUE	-0.742857	2.38928	1.05474	NA	NA	NA	1.5983	NA	NA	-0.741466	-0.263941	NA	2.49475	NA	1.58513	0.706109	-2.30195	NA	NA	NA	NA	-1.0818	0.411751	-0.740159	-1.03567	1.27662	NA	-0.0630031	1.68692	1.132	0.88008	-0.407353	-0.731379	-1.45911	1.471	1.96645	NA	NA	1.41299	NA	NA	-2.65168	0.950838	1.98269	NA	1.92388	-0.568048	NA
ccle_broad_2019	NCIH2052_PLEURA	-0.713047	-0.820915	0.533448	NA	NA	NA	1.27986	-0.265822	NA	0.69865	0.167759	NA	-1.8323	NA	-0.658137	NA	0.850169	NA	NA	NA	NA	1.14739	-0.641526	0.7263	0.424651	-0.736919	NA	0.558247	1.00073	-1.13551	NA	0.51842	NA	-1.31522	-0.0534165	NA	NA	0.949543	NA	NA	NA	1.92671	0.239814	-0.0980583	NA	-0.427791	0.591806	0.0872783
ccle_broad_2019	ZR751_BREAST	-0.712959	NA	NA	NA	NA	NA	NA	NA	NA	1.88781	-0.271698	NA	NA	NA	-0.0904366	NA	-0.652114	NA	NA	NA	NA	-0.670657	1.06502	-0.118955	-0.576654	NA	NA	0.226769	0.136575	-1.00481	0.512843	NA	NA	NA	-0.527484	NA	-1.38812	-0.0634937	NA	NA	NA	0.15707	-0.61806	NA	NA	-0.390236	NA	-0.7603
ccle_broad_2019	PECAPJ34CLONEC12_UPPER_AERODIGESTIVE_TRACT	-0.698681	1.51201	0.464385	NA	NA	NA	0.0253651	-1.23389	NA	0.39934	0.294128	NA	0.943974	0.54965	-0.109018	-0.0810224	0.82818	NA	NA	NA	NA	1.44503	-1.08347	0.0194303	-0.539341	-1.68519	NA	-0.782096	-0.290491	-0.217572	0.682999	0.0356216	3.39298	-1.55703	-0.97948	NA	NA	1.10571	NA	NA	NA	1.72189	-0.607286	0.0527096	NA	-0.134825	0.224974	0.329613
ccle_broad_2019	NCIH1568_LUNG	-0.676535	0.640677	-0.486888	NA	NA	NA	-1.27536	NA	1.15025	0.495728	-0.303214	NA	-0.568985	1.02637	0.773138	-0.0329879	-0.294085	NA	0.917802	NA	NA	-1.15611	0.618467	-0.772093	-1.08223	0.101533	NA	0.463523	-0.715667	-0.398817	1.29751	-0.445442	-0.258663	0.72938	-0.211847	NA	NA	0.601696	0.392983	NA	NA	0.463075	-0.561558	-0.68218	NA	-1.37802	NA	0.00358172
ccle_broad_2019	KMRC1_KIDNEY	-0.676417	-1.87916	-1.48345	NA	NA	NA	-0.542841	-0.710526	NA	-0.297521	-0.778334	NA	NA	NA	-0.144162	NA	0.461566	NA	NA	NA	-0.116673	NA	1.22746	-0.225859	0.992048	-0.810719	NA	-0.569755	-0.296293	-0.942261	-0.494119	0.138355	-0.716141	0.40662	0.244902	NA	-0.0305774	NA	NA	NA	NA	-0.0531468	-0.0434512	-0.328781	NA	-1.64789	NA	-0.22092
ccle_broad_2019	KATOIII_STOMACH	-0.656822	2.32234	-0.45117	NA	NA	NA	0.440804	NA	-0.529891	1.0629	-0.347615	NA	0.117418	0.226231	1.56685	0.518093	-0.116886	NA	0.882181	NA	NA	-0.612861	1.21209	1.18789	2.68167	0.80098	NA	0.805276	-0.443881	-0.201779	-2.89424	1.53125	-0.406499	0.282486	-0.0305626	NA	NA	-0.474129	-0.472325	NA	NA	0.834669	0.0460041	-0.147724	NA	1.11205	NA	-1.26175
ccle_broad_2019	HUH1_LIVER	-0.634607	-0.099195	NA	NA	NA	NA	-0.263105	-0.0798832	0.598852	0.234219	-0.783608	NA	-0.0204808	-0.51455	-0.173012	-0.831352	NA	NA	NA	NA	NA	NA	0.109142	-0.0513017	-0.541284	NA	NA	0.122114	-1.0853	0.222568	NA	-0.274605	NA	NA	0.202539	NA	NA	0.117639	NA	NA	NA	-0.191057	-0.459842	0.0847645	NA	0.00124637	NA	NA
ccle_broad_2019	LUDLU1_LUNG	-0.628222	-1.32253	-0.641626	NA	NA	NA	-0.106206	-0.91075	-1.09492	-2.05515	-0.333466	NA	-0.32099	0.380769	NA	NA	0.614468	0.324279	NA	NA	NA	-0.388899	-2.09731	-0.930462	-1.21749	-1.10028	NA	-1.3931	-0.908598	0.0809801	0.216252	-1.87974	NA	NA	-1.04754	NA	NA	1.56486	NA	NA	NA	-1.13268	-1.31933	-1.02023	NA	-0.528633	-0.0681803	2.36425
ccle_broad_2019	HCC38_BREAST	-0.613365	-0.629975	NA	NA	NA	NA	0.670526	-0.269311	NA	-1.01553	2.07049	NA	1.46372	NA	0.550852	NA	NA	NA	NA	NA	NA	0.00869567	-0.449164	-0.48384	-1.31302	NA	NA	-1.39139	-0.180689	0.448402	0.829569	-1.39532	NA	0.568409	-0.176951	NA	NA	NA	NA	NA	NA	-0.394489	1.20116	0.372405	NA	-0.138766	-0.962241	1.46777
ccle_broad_2019	C32_SKIN	-0.610019	-0.186369	0.116362	0.019155	NA	NA	0.954497	NA	0.0702433	0.466748	0.193193	NA	-0.38752	-1.02642	-0.444094	-0.184421	-1.00312	NA	NA	NA	NA	-0.251169	1.07182	1.62831	0.0702495	-0.103259	NA	0.428501	-0.911711	-1.35567	-1.28284	1.12758	0.399844	-0.730979	-0.120864	2.07062	-0.128011	-0.0388793	-0.333744	NA	NA	-0.755128	-0.592956	-1.25046	NA	-0.911358	NA	0.128833
ccle_broad_2019	NCIH1573_LUNG	-0.609856	-0.0829548	-0.0215656	NA	NA	NA	-1.48368	-1.80681	-1.39626	-2.68485	-0.888398	NA	-0.241154	0.712615	NA	-0.668449	0.716726	-0.39309	NA	NA	NA	-0.342396	-3.25431	-2.10663	-0.83333	-0.96169	NA	-2.00097	-2.06807	0.161125	-0.571643	-2.88454	-0.98005	NA	-0.841223	NA	-0.126225	-1.06449	-0.582077	NA	NA	0.995475	0.104629	0.215095	NA	-1.53037	-1.78743	0.626386
ccle_broad_2019	KYSE150_OESOPHAGUS	-0.59557	-0.307767	0.569673	0.237231	NA	NA	-0.867587	NA	NA	1.05112	1.93511	NA	-0.845013	-0.626265	-0.791224	NA	0.199279	-1.55154	NA	NA	NA	-0.41306	0.432849	0.303386	-0.21554	-0.731438	NA	0.210068	-0.583221	-0.855032	0.298281	0.885697	0.333187	-0.219558	-0.368368	-1.2399	0.726884	NA	NA	NA	NA	1.94403	0.0395857	0.993157	NA	-0.377687	NA	-0.493431
ccle_broad_2019	TCCSUP_URINARY_TRACT	-0.581083	0.534312	-0.154298	NA	NA	NA	NA	1.2312	0.324169	-0.170039	0.256901	NA	-0.423883	0.304426	NA	-0.152065	0.566339	NA	NA	NA	NA	2.02073	0.148139	0.440819	0.415941	NA	NA	-0.411439	-0.161341	0.15251	-0.734171	0.394301	-0.804274	1.09465	1.84147	-0.526658	NA	0.321797	0.00621077	NA	NA	0.484049	-0.237246	-0.201391	NA	0.325735	NA	0.683929
ccle_broad_2019	DAOY_CENTRAL_NERVOUS_SYSTEM	-0.579756	-0.838097	1.45155	-0.739865	NA	NA	-0.0209682	1.3427	-0.251507	0.822982	1.7203	NA	0.778477	NA	0.881649	NA	NA	NA	NA	NA	NA	NA	0.330781	-1.34075	-1.08282	-0.511948	NA	-0.147493	1.21029	0.851829	NA	-0.391033	-0.673021	-1.14289	-0.416317	-0.126687	NA	NA	NA	NA	NA	-1.34757	0.573823	2.95152	NA	0.352531	NA	0.199406
ccle_broad_2019	RPMI7951_SKIN	-0.55666	-1.09563	-0.0861282	NA	NA	NA	-0.281459	-0.0505128	NA	-0.363621	0.27807	NA	NA	NA	-0.192856	NA	0.0403507	NA	NA	NA	-0.147464	NA	0.256439	0.169414	0.297353	-0.0497237	NA	0.292513	0.468935	-0.484403	0.332688	0.181888	-0.829681	0.152675	0.00458759	NA	-0.58338	NA	NA	NA	NA	-0.302429	0.445695	0.209117	NA	-0.02619	NA	-0.147339
ccle_broad_2019	DU145_PROSTATE	-0.547569	-0.246812	-0.288769	NA	NA	NA	-0.788787	-0.387144	NA	-0.745917	1.14722	-0.0538783	0.109564	0.716281	0.533003	-0.0888906	0.999185	NA	NA	NA	NA	-0.953456	0.623522	-0.0991771	-0.243154	-0.100356	NA	-0.697306	-0.00809291	-0.110545	-0.482392	-0.810309	-0.848784	NA	0.245916	NA	-1.05429	3.44041	NA	NA	NA	2.76911	0.408494	0.505088	NA	-0.254721	-0.523128	1.81714
ccle_broad_2019	NCIH1299_LUNG	-0.544418	-0.614116	-0.0185918	NA	NA	NA	-0.592248	-0.886859	NA	0.615893	0.684086	NA	0.242022	NA	-0.154644	NA	-0.219751	NA	NA	NA	0.0355463	NA	1.30016	0.150292	-1.3909	-0.129616	NA	0.145207	-0.0657465	-0.203956	0.897081	0.698679	-0.555413	NA	0.803301	NA	1.06495	0.0171178	NA	NA	NA	-0.740371	-0.487798	0.379734	NA	-0.339309	-0.577519	0.681133
ccle_broad_2019	JIMT1_BREAST	-0.543724	-0.246059	NA	NA	NA	NA	1.55409	-0.390024	-0.213707	-0.507171	0.193752	NA	-0.306646	-0.0226556	-0.0821531	0.666106	NA	NA	NA	NA	NA	NA	0.248371	0.414162	-0.335937	NA	NA	-0.123556	-0.928137	0.195861	NA	1.12631	NA	NA	-0.40233	NA	NA	0.279752	NA	NA	NA	0.280015	-0.232893	-0.112413	NA	0.0472024	NA	NA
ccle_broad_2019	NCIH23_LUNG	-0.542203	0.0998194	-0.916106	NA	NA	NA	0.735647	1.59633	NA	-0.806834	-1.34534	NA	0.438622	NA	0.908508	NA	1.30426	-1.18068	NA	NA	NA	-0.635384	0.490777	-0.524165	-1.51636	0.847555	NA	0.0228486	-0.626109	0.389223	-0.459237	NA	-0.298742	0.617463	0.0840201	-0.987537	NA	-0.905015	1.26036	NA	NA	-0.564704	0.520574	0.979689	NA	-0.455337	NA	0.776118
ccle_broad_2019	RT112_URINARY_TRACT	-0.539782	-0.96589	0.402464	NA	NA	NA	-0.455167	1.34377	0.3896	-0.18823	0.347395	NA	1.02898	0.538451	NA	NA	-0.135812	0.958627	NA	NA	NA	0.82082	-0.00304449	-0.0549083	-1.08444	0.157192	NA	-0.53453	-0.709291	0.872815	0.75201	-0.279548	NA	NA	-0.135739	NA	NA	-0.670323	NA	NA	NA	-0.468868	0.829949	0.35474	NA	0.614662	0.584153	0.525669
ccle_broad_2019	KYSE180_OESOPHAGUS	-0.529734	-0.0537041	-0.437125	NA	NA	NA	NA	1.71846	NA	0.360363	0.982023	NA	1.49679	NA	1.99712	-0.0443948	0.597058	NA	NA	NA	-0.235655	-0.846814	-0.200414	0.346591	-0.819197	0.0692704	NA	-0.191417	0.176078	1.52203	NA	0.608466	-0.197114	NA	0.553793	0.0255061	NA	1.77943	NA	NA	NA	0.0300549	1.25077	2.20419	NA	0.232596	0.424435	1.57302
ccle_broad_2019	TE1_OESOPHAGUS	-0.524081	-0.00573067	0.349399	NA	NA	NA	NA	1.12389	NA	0.0723089	-0.33879	NA	0.146369	0.0458799	NA	-0.0749014	0.410829	NA	NA	NA	0.583246	NA	1.45432	NA	-0.598921	-0.224806	NA	-0.639085	1.15843	0.541971	-0.241601	-1.05501	-0.0648128	-0.17621	0.898891	NA	NA	NA	NA	NA	NA	0.702299	0.717414	-0.144863	NA	-0.0259554	NA	0.932614
ccle_broad_2019	KYSE70_OESOPHAGUS	-0.518359	0.365725	NA	NA	NA	NA	0.519517	1.2503	0.742085	-0.380012	1.46612	NA	2.13752	-0.577784	NA	NA	NA	NA	NA	NA	NA	-0.547204	-1.3538	0.544047	-0.487345	-0.365381	NA	0.507572	-0.339869	1.27404	0.960711	1.20522	NA	NA	0.218461	NA	NA	3.31836	NA	NA	NA	1.33233	1.83436	0.201921	NA	1.69609	NA	-0.496196
ccle_broad_2019	NCIH1693_LUNG	-0.512047	-0.0542787	0.314624	NA	NA	NA	NA	-2.01426	NA	-0.748608	0.0598725	NA	-0.654654	-0.34425	NA	-0.0829693	-0.586145	NA	NA	NA	-0.511895	NA	-1.10741	NA	-1.16718	0.0434379	NA	-0.680676	-0.67719	-0.321513	1.0583	-0.4737	0.88751	-0.880271	0.486748	NA	NA	NA	NA	NA	NA	-0.564074	0.355503	-0.0187414	NA	0.18755	NA	1.42799
ccle_broad_2019	OVCAR4_OVARY	-0.505249	-1.20612	NA	NA	NA	NA	1.18627	0.524188	NA	-0.357049	0.0969698	NA	0.518197	NA	-1.09834	NA	NA	NA	NA	NA	NA	0.181659	-0.669925	0.319887	-0.250509	NA	NA	0.724914	-0.892797	0.450748	-1.1386	1.41592	NA	-0.463479	-0.206121	NA	NA	NA	NA	NA	NA	1.20663	0.464389	0.428086	NA	0.744017	0.16517	-0.585018
ccle_broad_2019	HCC1954_BREAST	-0.496792	0.108326	0.647486	NA	NA	NA	NA	0.523993	NA	-0.0870206	2.38985	NA	-0.297884	-0.012026	NA	0.208136	0.463043	NA	NA	NA	-0.462216	NA	0.677987	NA	0.617716	0.200722	NA	-0.106252	-0.316715	-0.127136	-0.261159	0.106518	0.0556234	0.943356	-0.594131	NA	NA	NA	NA	NA	NA	-0.0903692	-0.111011	0.953574	NA	-0.383127	NA	0.0678656
ccle_broad_2019	OCUM1_STOMACH	-0.491509	-0.07022	NA	NA	NA	NA	NA	-0.275417	0.0689183	-1.83279	-0.889233	NA	-1.34478	NA	NA	NA	NA	NA	NA	NA	NA	-1.7878	1.69893	1.34166	0.77366	-0.501993	NA	-1.2211	-1.9523	-0.0868276	NA	-0.166534	NA	NA	NA	NA	NA	NA	0.556735	NA	NA	2.20395	-2.25999	NA	NA	-1.55872	NA	0.407956
ccle_broad_2019	NCIH2126_LUNG	-0.491332	-1.10812	-0.790927	NA	NA	NA	-0.0420783	-0.899081	NA	0.0627737	-0.773456	2.64036	NA	NA	NA	-0.431944	0.0602045	NA	NA	NA	NA	-0.610296	1.48159	1.08296	-0.114998	NA	NA	0.595274	-1.33356	-1.12815	-0.611644	-0.792433	NA	NA	-0.481	NA	NA	-1.46203	NA	NA	NA	-0.398367	-0.389172	-1.13015	NA	-1.40843	NA	1.431
ccle_broad_2019	CAKI2_KIDNEY	-0.483476	0.397473	0.965712	NA	NA	NA	-0.211225	-2.1942	NA	0.539134	-1.64145	NA	-0.711369	NA	-0.225445	NA	2.39106	NA	NA	NA	-0.429851	NA	1.38523	0.451757	2.05336	-0.682502	NA	-0.616909	-0.00696617	-0.557799	0.158154	-1.50767	0.639383	NA	-0.948382	NA	-2.82092	-0.963983	NA	NA	NA	-0.796564	-0.667503	-1.48489	NA	-0.356506	0.134449	-0.23803
ccle_broad_2019	SNB19_CENTRAL_NERVOUS_SYSTEM	-0.473605	-0.353822	0.0268162	NA	NA	NA	-0.429124	-0.368328	NA	-0.954817	0.447627	NA	-0.726824	NA	0.0470678	NA	0.844584	NA	NA	NA	NA	0.173158	0.225868	-0.182493	-0.414864	-2.19924	NA	-1.09693	-0.109202	-0.630633	NA	0.194943	NA	-0.966672	-1.21452	NA	NA	0.0174162	NA	NA	NA	-0.173716	0.612691	-0.666168	NA	-0.48471	0.0490946	1.70412
ccle_broad_2019	IGR1_SKIN	-0.466042	-1.42133	-1.89255	-0.232328	NA	NA	-0.283781	NA	0.552176	-2.04583	-0.0920393	NA	-0.436975	NA	1.60175	NA	-0.340226	NA	NA	NA	4.35613	-0.454472	-1.42488	-0.8732	0.360933	-1.51235	NA	-1.12677	1.93047	0.865891	NA	-1.05375	-0.813087	0.198269	-0.814661	NA	NA	-0.302881	NA	NA	NA	-1.71006	0.078478	-0.699066	NA	-0.457845	-2.15258	0.503346
ccle_broad_2019	JHOS2_OVARY	-0.462297	-0.199508	0.533534	NA	NA	NA	0.602656	NA	NA	0.37365	-1.10082	NA	-0.553662	NA	-1.6801	0.696939	0.279442	NA	NA	NA	NA	-0.504955	1.5846	0.337359	0.71666	-0.228769	NA	1.0435	0.591272	-1.33501	-1.14782	1.07897	-0.0251003	-0.859247	-0.26238	NA	0.297942	-0.380553	NA	NA	NA	1.47488	-0.89104	0.0722915	NA	-0.577419	0.248068	0.0507622
ccle_broad_2019	HCC44_LUNG	-0.45733	0.178947	0.350556	NA	NA	NA	NA	-0.0975853	-0.985367	-0.406719	0.741402	NA	-0.0600171	-0.144026	NA	0.278349	0.895615	NA	NA	NA	NA	-0.849191	1.33679	0.815256	-0.355984	NA	NA	-1.1408	0.28289	0.464034	0.792861	0.233222	-0.341537	-1.49784	-1.34016	-0.989513	NA	-0.163731	-0.0106902	NA	NA	-0.743111	-0.427409	-0.21554	NA	-0.870741	NA	0.516609
ccle_broad_2019	KPL1_BREAST	-0.435057	-0.621946	NA	NA	NA	NA	-0.621842	2.45386	-0.0510591	0.573145	-0.116466	NA	0.524451	0.00266156	0.477773	-0.154832	NA	NA	NA	NA	NA	NA	-1.20515	-0.679878	-0.916307	NA	NA	-1.06854	-0.115815	0.691848	NA	-1.23465	NA	NA	-0.943658	NA	NA	-1.05379	NA	NA	NA	0.440493	-1.323	0.466015	NA	1.39644	NA	NA
ccle_broad_2019	MCF7_BREAST	-0.428508	-0.125865	-0.920759	NA	NA	NA	NA	1.84135	NA	1.14216	-0.081111	NA	-0.189589	0.148818	NA	0.0820663	0.514085	NA	NA	NA	-0.0118184	NA	-0.576143	NA	0.0716245	-0.455994	NA	-0.0716871	0.857014	-0.620936	0.400553	-0.412044	0.87353	0.059409	-0.457348	NA	NA	NA	NA	NA	NA	-0.580943	-1.70902	-0.11957	NA	2.36563	NA	-0.595597
ccle_broad_2019	A172_CENTRAL_NERVOUS_SYSTEM	-0.428491	-0.324721	-0.729473	NA	NA	NA	1.88116	-1.00903	-0.55908	0.532052	-1.14068	NA	-1.81716	-0.660645	0.0539562	0.54709	0.77868	NA	NA	NA	NA	0.830269	0.287505	0.351517	1.06539	0.0432127	NA	0.202014	1.98892	-2.7068	NA	0.707287	-0.524254	0.0773773	-0.00189096	NA	NA	NA	NA	NA	NA	0.527739	1.8194	1.02238	NA	0.61691	0.601884	0.830983
ccle_broad_2019	NCIH3255_LUNG	-0.408784	0.595661	NA	NA	NA	NA	-0.90448	0.828521	-1.99387	-1.6035	-1.44978	NA	-0.261883	0.319846	NA	0.13824	1.32725	NA	NA	NA	NA	0.047813	-2.01655	-0.405142	-1.42307	-0.235966	NA	-0.872503	-0.00480866	-0.0635606	0.769021	0.473983	0.853578	NA	-0.083369	NA	NA	0.972429	1.70954	NA	NA	0.573992	0.210811	-0.234927	NA	0.589046	-0.311802	1.41525
ccle_broad_2019	EFM192A_BREAST	-0.37264	-0.731359	-1.34553	NA	NA	NA	NA	0.586532	-0.467549	0.0634261	-0.812809	NA	0.355827	NA	-0.707276	NA	-2.17658	NA	NA	NA	NA	-0.991404	0.672477	1.07266	0.0613311	-1.25132	NA	0.504805	-1.40009	0.210744	NA	-0.422084	NA	NA	0.381415	NA	NA	NA	-0.13399	NA	NA	0.394255	-1.76345	NA	NA	1.29512	NA	-0.205531
ccle_broad_2019	HS695T_SKIN	-0.368684	0.0297051	0.274804	NA	NA	NA	-0.115935	-1.4198	NA	-0.767221	0.234868	-0.178338	0.0267891	1.08078	-0.702348	NA	-0.260903	NA	NA	NA	-0.590054	NA	0.577216	-0.138329	0.268108	-0.0468484	NA	0.557015	0.528508	0.113802	-0.455435	-0.824066	-0.34024	NA	-0.292988	0.664273	0.66601	-0.338201	NA	NA	NA	0.476277	-0.53063	0.129403	NA	0.320133	NA	0.660623
ccle_broad_2019	QGP1_PANCREAS	-0.366344	0.231948	NA	NA	NA	NA	-0.77813	0.729358	NA	0.677648	-2.07248	NA	0.0760817	NA	-0.243431	NA	NA	NA	NA	NA	NA	-0.41835	0.755823	0.668381	0.967194	NA	NA	-0.780378	-0.755062	-0.912323	-0.436437	-0.457502	NA	0.775556	0.597072	NA	NA	NA	NA	NA	NA	-0.881112	0.506447	-0.0757062	NA	-0.0790744	-0.649048	-0.242965
ccle_broad_2019	HSC3_UPPER_AERODIGESTIVE_TRACT	-0.352893	NA	-1.29788	NA	NA	NA	-0.0929088	NA	NA	-0.010511	0.797963	NA	1.06127	NA	NA	-0.633478	0.556849	NA	NA	NA	NA	0.48628	-0.423137	1.59179	-0.460106	-1.24874	NA	-0.614171	-0.374738	0.574866	1.05021	0.105352	NA	NA	2.22123	NA	NA	0.390296	NA	NA	NA	-0.147876	0.0600577	0.0897583	NA	-0.0500121	NA	0.72087
ccle_broad_2019	HT1376_URINARY_TRACT	-0.351781	0.541518	NA	NA	NA	NA	0.523746	-0.267341	0.377612	1.5662	-0.256591	NA	1.52307	-0.0882849	NA	-0.563123	-1.07982	NA	NA	NA	NA	1.89251	0.716328	-0.441505	1.83146	0.0203154	NA	0.369996	1.40439	0.313538	1.40427	0.50638	-0.188197	NA	-0.951063	NA	NA	-0.160709	-3.22411	NA	NA	-0.394314	-2.59506	0.998018	NA	-0.326794	0.386362	0.924906
ccle_broad_2019	COLO741_SKIN	-0.349554	-0.387045	NA	NA	NA	NA	-0.203313	-0.376823	NA	-1.18045	-0.0994268	NA	1.15044	NA	1.44988	NA	NA	NA	NA	NA	NA	0.425467	-0.370681	-0.814711	-0.901971	NA	NA	-0.0766488	0.78188	0.858736	1.87901	-1.94001	NA	-3.52395	-0.699002	NA	NA	NA	NA	NA	NA	-0.334698	0.103357	-0.656386	NA	-0.445928	0.15984	-0.368692
ccle_broad_2019	TC71_BONE	-0.344269	0.299161	0.0391142	-0.479955	NA	NA	-0.285046	NA	0.33833	0.622456	0.366172	NA	0.461166	0.341531	-0.17477	0.587689	0.195446	NA	NA	NA	NA	-0.235559	-0.101351	0.0530083	0.649564	0.0697034	NA	-0.0793758	0.0230553	0.870695	0.917654	0.149356	-1.48356	0.847768	0.972722	-0.566708	-0.252424	0.653274	0.520909	NA	NA	-1.46884	0.775268	0.971789	NA	-0.0151681	NA	-1.25443
ccle_broad_2019	ASPC1_PANCREAS	-0.33907	0.551278	NA	NA	NA	NA	0.7787	-0.822711	-0.0213443	-0.545842	-0.26826	-0.0507717	-3.70933	NA	-0.296567	NA	0.257883	NA	NA	NA	NA	-2.58196	1.51778	1.20641	1.71107	-0.65684	NA	1.02503	-1.44705	-0.0554375	NA	0.765926	NA	NA	0.102173	NA	NA	NA	NA	NA	NA	0.659464	0.0342177	0.590248	NA	-1.10939	-0.129439	-1.55374
ccle_broad_2019	SKHEP1_LIVER	-0.334798	0.0843269	NA	NA	NA	NA	NA	-0.522041	NA	0.537829	-0.45578	NA	-0.694071	NA	-1.73534	1.02618	NA	NA	NA	NA	NA	NA	0.396907	0.156809	0.926036	-0.55285	NA	0.338467	0.291786	-0.675906	-0.966699	0.538288	NA	NA	-0.294669	NA	NA	-0.545225	NA	NA	NA	0.716031	-0.162088	NA	NA	-1.15706	NA	0.127322
ccle_broad_2019	NCIH2030_LUNG	-0.322877	-0.00552851	NA	NA	NA	NA	-0.168125	0.212135	-0.21548	0.750095	0.762019	NA	-0.335807	1.84228	NA	NA	NA	NA	NA	NA	NA	-0.762492	0.747824	0.290616	-0.717524	0.170243	NA	-0.429678	-0.760303	0.659191	-0.225	-0.820101	NA	NA	-0.414402	NA	NA	0.601583	NA	NA	NA	-0.76327	-0.680244	-0.263947	NA	-0.296188	NA	-0.383808
ccle_broad_2019	HEP3B217_LIVER	-0.322627	-0.73179	NA	NA	NA	NA	NA	-0.474794	NA	0.398672	0.532353	NA	-0.36098	NA	1.93937	-0.975459	NA	NA	NA	NA	NA	NA	-0.0753889	-0.591584	-1.04553	-0.664149	NA	-0.434254	-1.54878	0.721476	-0.335624	-0.295724	NA	NA	0.0796639	NA	NA	-0.334175	NA	NA	NA	-0.593094	-0.28826	NA	NA	0.0632566	NA	0.259703
ccle_broad_2019	NCIH1703_LUNG	-0.316491	0.716812	-1.05396	NA	NA	NA	-1.12191	-1.08962	-0.617233	1.05758	-1.26703	NA	-0.0908227	-0.266758	0.733512	NA	0.767032	NA	NA	NA	NA	-0.733933	0.231905	-0.371529	0.0228277	0.364567	NA	-0.521855	-0.421085	0.145605	0.361276	-1.42858	-0.123549	NA	-0.820666	NA	NA	0.142724	NA	NA	NA	-0.681137	0.899598	-0.891334	NA	-0.40388	0.416188	-0.023994
ccle_broad_2019	FADU_UPPER_AERODIGESTIVE_TRACT	-0.295281	-0.625184	-1.67262	NA	NA	NA	1.25017	1.61806	0.258157	-1.08213	2.51663	NA	1.61254	0.359796	0.393684	-0.448573	0.315501	NA	NA	NA	NA	0.0693836	0.26881	0.426969	1.03599	-0.955056	NA	-1.10217	-1.97175	2.98087	NA	-0.702913	0.03668	-0.296875	1.41249	NA	NA	NA	NA	NA	NA	1.41637	-1.29185	-1.5046	NA	-1.34199	-0.578983	-0.817758
ccle_broad_2019	NCIH2286_LUNG	-0.277743	-0.586693	0.277324	NA	NA	NA	2.12582	-0.274879	-1.14825	0.233539	-0.994237	NA	-0.187744	0.202521	1.7676	NA	-1.01568	NA	NA	NA	NA	-2.01514	0.465725	-0.145286	-0.198338	0.444781	NA	0.468981	-0.202479	0.0319222	-1.06533	1.06565	-0.587302	NA	0.332671	NA	NA	-0.544573	NA	NA	NA	1.95966	0.710004	0.867032	NA	-0.744383	0.401951	0.168666
ccle_broad_2019	HEC50B_ENDOMETRIUM	-0.277454	0.114371	NA	NA	NA	NA	-0.283286	-0.272501	-0.360213	1.04812	-0.996508	0.388536	-1.68273	NA	-1.06246	NA	0.619068	NA	NA	NA	NA	-0.832845	1.10876	1.29867	-0.847357	1.08536	NA	0.765143	-0.388338	-1.67061	NA	0.072173	NA	NA	0.698758	NA	NA	NA	NA	NA	NA	-1.07181	-0.0915006	1.61536	NA	-1.51679	3.48192	-0.391054
ccle_broad_2019	WM2664_SKIN	-0.274778	0.642498	NA	NA	NA	NA	NA	0.357845	NA	0.587018	-0.741773	NA	-0.758476	NA	-0.412021	0.85534	NA	NA	NA	NA	NA	NA	0.0906624	-0.257337	0.107009	0.423776	NA	0.339007	-0.493783	-0.874275	-0.382789	0.216529	NA	NA	-0.158477	NA	NA	-0.0964162	NA	NA	NA	-0.428568	-0.509566	NA	NA	-0.0496874	NA	-0.854659
ccle_broad_2019	PL45_PANCREAS	-0.270131	0.646761	-0.279635	0.00796098	NA	NA	-0.13405	NA	NA	1.19501	-0.298002	NA	0.0629547	0.55307	-0.190468	NA	0.796601	1.83055	NA	NA	NA	1.36482	0.561319	1.13897	0.562586	-0.903893	NA	0.461167	0.629612	-0.257838	-0.738435	0.354929	0.896598	-0.573005	0.369373	-1.08388	0.680758	NA	NA	NA	NA	1.10838	0.146209	0.764495	NA	-0.328296	NA	1.10203
ccle_broad_2019	HUH7_LIVER	-0.256766	-0.0125734	-0.284951	NA	NA	NA	0.693281	-1.23019	NA	-0.105598	-0.0718511	NA	-0.747783	NA	1.28039	NA	0.992854	NA	NA	NA	-0.233286	NA	1.09445	0.0996482	-0.666097	-0.302682	NA	-0.36161	-0.310274	-0.856307	0.414112	-0.202223	0.547098	NA	0.526947	NA	-0.138155	-0.530989	NA	NA	NA	-0.808049	-1.15406	-1.59432	NA	0.276106	-1.25289	-0.170236
ccle_broad_2019	MFE280_ENDOMETRIUM	-0.256371	0.169321	-1.3646	NA	NA	NA	-0.342432	0.93626	NA	-0.700188	0.404368	NA	1.62159	NA	0.268354	NA	-0.663115	NA	NA	NA	NA	-1.44038	-0.868542	-0.325537	-2.2844	0.282227	NA	-0.639453	0.591332	1.24266	NA	-1.23963	NA	0.259399	0.661776	NA	NA	1.22582	NA	NA	NA	0.0506756	0.893394	0.585716	NA	1.72544	-0.010101	2.50888
ccle_broad_2019	F36P_HAEMATOPOIETIC_AND_LYMPHOID_TISSUE	-0.254274	-1.23585	NA	NA	NA	NA	0.76443	0.929927	-0.367678	1.8355	-0.799908	0.0325687	3.03559	NA	-0.43437	NA	-0.824174	NA	NA	NA	NA	0.854108	0.546384	0.269137	0.26272	1.7115	NA	1.79486	-0.930888	-0.953376	NA	-0.462281	NA	NA	0.236829	NA	NA	NA	NA	NA	NA	-0.931261	0.207693	-1.67191	NA	1.26393	0.41074	-1.64502
ccle_broad_2019	COLO829_SKIN	-0.250768	1.38788	-1.26777	1.19491	NA	NA	1.80927	-0.344725	0.839489	0.731583	-0.810066	NA	0.250793	NA	-0.80689	0.527373	-1.06531	NA	NA	NA	NA	-0.606664	1.18332	0.809497	1.98141	1.39824	NA	-1.25807	2.30938	-1.14124	-0.405212	0.548469	NA	0.770405	1.262	NA	NA	NA	0.0946793	NA	NA	0.923397	-1.17224	0.156908	NA	1.54191	0.360932	-0.153739
ccle_broad_2019	KP2_PANCREAS	-0.250768	-0.118427	1.30169	-0.84192	NA	NA	0.857894	1.15634	0.381233	0.879892	-1.26116	NA	-0.653084	-0.230882	0.0969176	0.597955	0.965895	NA	0.39098	NA	NA	1.55048	0.68838	0.62149	0.862017	-2.15157	NA	-0.461263	1.70855	-0.828409	NA	-0.247087	NA	NA	-2.37318	NA	NA	-0.171281	NA	NA	NA	0.450453	0.263186	0.373827	NA	-0.694163	0.582769	0.155036
ccle_broad_2019	OV90_OVARY	-0.244134	-0.955103	-0.489933	NA	NA	NA	1.17993	0.529652	NA	-0.845857	-1.17702	NA	-0.338777	NA	-0.289261	NA	1.01446	NA	NA	NA	NA	-1.63685	-0.258648	0.598157	-1.36006	-1.59486	NA	-0.726257	-1.22085	0.0029606	NA	-1.28351	NA	-1.70944	0.262062	NA	NA	-0.931331	NA	NA	NA	-1.00673	1.41163	0.184902	NA	-0.404347	0.167534	-0.394127
ccle_broad_2019	RMUGS_OVARY	-0.234297	-0.847633	0.678533	NA	NA	NA	0.20635	0.309315	0.479547	-0.162458	-0.481895	NA	0.622497	NA	-0.321657	0.694396	0.284054	NA	NA	NA	NA	-0.172882	0.347656	0.0248969	0.113236	0.494429	NA	-0.00404874	-0.123553	-0.481397	-0.950416	-0.127862	0.654332	NA	0.350115	NA	-0.686452	0.243186	NA	NA	NA	-0.161999	-0.523732	-0.116733	NA	1.42838	NA	1.22724
ccle_broad_2019	CMK_HAEMATOPOIETIC_AND_LYMPHOID_TISSUE	-0.228865	0.538465	0.251909	0.0304239	NA	NA	-1.57365	-0.0701792	-1.02016	0.228248	-1.11991	NA	0.418061	NA	0.0187921	0.2927	0.498543	NA	NA	NA	NA	0.476365	0.496278	-0.0550727	0.0357468	1.44052	NA	1.38139	-2.94056	-0.0524283	0.450249	0.0170033	NA	0.623872	-0.0427024	NA	NA	NA	0.577393	NA	NA	0.234152	-1.7183	0.439455	NA	2.44796	1.2607	-1.11837
ccle_broad_2019	SNUC1_LARGE_INTESTINE	-0.217565	-0.713206	0.202252	NA	NA	NA	1.01624	-0.590682	0.264533	1.0502	-0.895457	NA	-0.679161	-1.1634	-0.218243	NA	1.11039	NA	NA	NA	NA	-1.06861	-0.42524	-0.264344	0.714493	-1.25351	NA	1.6304	1.0058	-1.15677	-0.229052	1.11849	0.0169871	NA	-0.592999	NA	NA	-0.598388	NA	NA	NA	2.21068	-0.740739	-0.432634	NA	-0.593712	0.0284851	0.431729
ccle_broad_2019	RKO_LARGE_INTESTINE	-0.21372	-0.278782	NA	NA	NA	NA	0.971359	0.546353	1.17357	0.040078	-0.0319489	-0.224728	0.463038	NA	1.55465	NA	-0.144462	-0.832357	NA	NA	-0.686362	NA	1.50108	-0.120001	-0.822665	1.2384	NA	0.0143671	0.90489	0.117165	1.01154	0.843586	NA	-0.317065	NA	NA	0.841184	0.793341	NA	NA	NA	-0.341408	-0.639886	1.14587	NA	-0.00861069	-0.0906591	0.101949
ccle_broad_2019	SBC5_LUNG	-0.212464	-0.66025	NA	NA	NA	NA	-1.05055	-2.69661	0.133843	-0.046977	0.700265	NA	1.22583	-0.359548	NA	1.19685	-1.6123	NA	NA	NA	NA	-1.2838	0.135972	-1.12934	-0.45156	0.0259741	NA	-0.491577	-0.750195	2.88696	1.34326	-1.0217	-1.49539	NA	0.123026	NA	NA	0.692041	-0.0131708	NA	NA	-0.249994	-2.03243	1.49561	NA	-2.45851	-2.19902	-1.42374
ccle_broad_2019	TUHR4TKB_KIDNEY	-0.202741	0.0876749	NA	NA	NA	NA	-0.202232	-1.56536	-0.148968	0.355701	-0.297195	NA	-1.50399	0.385065	NA	NA	NA	NA	NA	NA	NA	1.57024	1.45235	0.0336262	1.62625	0.131853	NA	1.01662	0.709496	-2.04184	-0.827032	1.71811	NA	NA	1.8366	NA	NA	-0.866757	NA	NA	NA	0.231535	0.0694453	0.0306389	NA	-1.0834	NA	-0.0511014
ccle_broad_2019	CAL851_BREAST	-0.193058	NA	-0.72715	NA	NA	NA	-1.18686	NA	NA	-0.612268	0.427618	NA	-0.990319	NA	NA	-0.374372	-0.355788	NA	NA	NA	NA	0.22912	-0.0178762	-2.5353	-1.03495	-0.835663	NA	-1.45806	0.433027	-0.299989	-1.44596	-1.26674	NA	NA	-0.636612	NA	NA	-1.83387	NA	NA	NA	-0.731637	-0.743378	-1.57965	NA	-0.384986	NA	0.402922
ccle_broad_2019	CAMA1_BREAST	-0.19282	-0.0799773	NA	NA	NA	NA	-0.596344	-0.356594	-0.32888	0.516203	0.905369	0.217356	-0.362117	NA	0.99774	NA	0.711163	0.701792	NA	NA	-0.731785	NA	0.433556	0.407738	-0.0774587	0.219321	NA	-0.00986624	-0.42919	-0.620794	-0.287658	0.467654	NA	0.42155	NA	NA	-1.36084	-0.580477	NA	NA	NA	-0.198033	-0.640728	0.470986	NA	-0.0496914	3.44332	0.0817406
ccle_broad_2019	A673_BONE	-0.191583	-0.71967	0.0816295	NA	NA	NA	0.568279	NA	NA	-0.346403	0.543721	NA	0.0537143	NA	0.78988	-0.210903	-0.868002	NA	NA	NA	NA	-1.23235	-1.41126	-0.0498253	-1.12257	-0.0438228	NA	-0.572793	0.803396	2.37718	-0.704589	0.91359	-1.27369	0.414503	-0.255907	-0.486275	NA	NA	0.176033	NA	NA	-1.55966	1.46295	0.400893	NA	1.54043	0.0536222	NA
ccle_broad_2019	U937_HAEMATOPOIETIC_AND_LYMPHOID_TISSUE	-0.168012	0.853731	0.544738	NA	NA	NA	0.0958494	-0.695849	-1.19038	0.58762	-0.3092	NA	-1.05462	NA	-0.312273	1.27215	-0.509785	NA	NA	NA	NA	0.083122	-0.596094	-0.290297	0.117344	-0.907683	NA	0.491976	-0.471613	0.184944	2.29785	0.0727312	-1.75513	NA	-0.27969	NA	0.235704	-0.953221	NA	NA	NA	0.851001	-0.375053	-0.273727	NA	-0.716749	NA	-1.75987
ccle_broad_2019	CALU1_LUNG	-0.167293	-0.851006	0.578757	NA	NA	NA	NA	-1.54665	NA	1.17458	-1.04207	NA	-0.246362	NA	-1.6563	0.483301	-0.512946	NA	NA	NA	-0.668403	-0.263179	1.24278	1.14263	0.813922	-1.02106	NA	0.0848162	1.51145	-1.89875	NA	-0.223571	0.934056	NA	-0.548199	-0.0832334	NA	-2.86064	NA	NA	NA	1.68139	-0.462892	-2.60547	NA	-1.42265	0.298975	-2.82481
ccle_broad_2019	786O_KIDNEY	-0.1552	NA	NA	NA	NA	NA	NA	NA	NA	1.75208	-1.7341	NA	NA	NA	-1.02859	NA	-1.5668	NA	NA	NA	NA	1.22916	2.72978	1.08877	-0.563505	NA	NA	-0.201524	-2.72504	-0.889242	-0.860986	NA	NA	NA	-1.29972	NA	-0.586725	-0.411574	NA	NA	NA	0.744997	-0.375988	NA	NA	-1.13204	NA	-1.44853
ccle_broad_2019	HCC95_LUNG	-0.15418	-0.329869	NA	NA	NA	NA	-0.644408	-0.453478	NA	-0.256137	1.08663	NA	-3.52806	NA	-0.0261158	NA	NA	NA	NA	NA	NA	-0.360104	-0.0911333	-1.01589	1.26991	NA	NA	0.805085	-0.294207	-0.212318	-0.846519	2.68825	NA	-1.54198	-0.0793533	NA	NA	NA	NA	NA	NA	-0.000327614	0.380873	1.63267	NA	0.223895	0.00222853	0.346769
ccle_broad_2019	LXF289_LUNG	-0.154118	0.128271	0.14856	NA	NA	NA	-0.0168626	-0.730052	-1.71885	0.525953	0.883183	NA	-0.59428	NA	-0.127797	0.633656	0.139356	NA	NA	NA	NA	-0.0232093	1.92922	0.131885	-0.109212	-0.0217398	NA	0.0575755	0.195262	-0.770622	0.228578	0.00794811	-0.665158	NA	-0.379498	NA	0.941133	-0.0274603	NA	NA	NA	0.235405	-0.0830629	-0.213234	NA	-1.08627	NA	-0.508991
ccle_broad_2019	NCIH1650_LUNG	-0.153482	-0.599498	NA	NA	NA	NA	0.739515	0.606705	NA	0.707376	-0.652646	NA	-0.810971	NA	-0.454247	NA	NA	NA	NA	NA	NA	0.0252872	-0.212578	0.463038	0.28874	NA	NA	-0.826343	1.0172	-0.748234	-0.948007	4.32951	NA	2.42239	-1.14256	NA	NA	NA	NA	NA	NA	0.635698	0.177379	0.686465	NA	-0.0775202	0.503973	2.10053
ccle_broad_2019	SW1990_PANCREAS	-0.15169	-0.243124	-0.402022	NA	NA	NA	0.102139	-2.85587	NA	-0.90961	1.29412	NA	-0.674496	0.199303	-0.0203668	0.954282	3.01941	NA	NA	NA	NA	1.40453	-0.582232	0.384373	0.149209	-0.73947	NA	-1.86321	-0.0335759	-1.3544	-0.42993	-0.753463	4.06992	-0.913824	-1.83785	NA	NA	0.177123	NA	NA	NA	2.40016	-0.713337	-1.08236	NA	-0.686018	0.0020145	0.263305
ccle_broad_2019	PANC1_PANCREAS	-0.14911	-1.00378	-1.14331	NA	NA	NA	NA	0.833707	1.77258	-1.02632	-0.352998	NA	-0.370141	NA	-0.0447286	NA	1.23628	NA	NA	NA	NA	-0.645499	0.0103961	-0.356324	-1.25555	-1.38663	NA	-0.436255	0.424251	-0.524352	NA	0.010267	NA	NA	-0.958411	NA	NA	NA	-0.870603	NA	NA	-0.484014	0.710139	NA	NA	-0.78748	NA	0.960889
ccle_broad_2019	LS513_LARGE_INTESTINE	-0.13458	0.941396	-0.937659	NA	NA	NA	0.404632	-0.077359	0.696453	0.930253	0.398507	NA	-0.0888882	-1.05714	NA	NA	-0.60708	2.01136	NA	NA	NA	1.24515	0.253111	0.107817	0.406165	0.458169	NA	-0.435621	0.0937547	-0.350671	0.21923	-0.0335379	NA	NA	-0.104979	NA	NA	1.04017	NA	NA	NA	-0.109263	-0.518441	0.175004	NA	-0.107303	-1.89367	0.353139
ccle_broad_2019	NCIH1048_LUNG	-0.126411	NA	-0.405652	NA	NA	NA	-0.130459	NA	NA	0.30163	-0.128546	NA	1.52912	NA	NA	-0.752727	0.23747	NA	NA	NA	NA	0.587147	-0.373435	0.587291	-0.564114	1.65001	NA	-0.108807	-0.309753	-0.594038	0.789253	0.336583	NA	NA	1.17582	NA	NA	0.149802	NA	NA	NA	-0.426257	0.623083	-0.556792	NA	1.13384	NA	-0.0958131
ccle_broad_2019	SF295_CENTRAL_NERVOUS_SYSTEM	-0.12434	0.531367	-1.00817	NA	NA	NA	NA	-1.30606	NA	-1.25264	-1.04777	NA	-0.215593	NA	-0.901701	0.745893	1.3357	NA	NA	NA	0.816749	0.106308	2.59098	2.30989	1.30199	-0.983925	NA	-0.949997	-1.48191	0.833257	NA	-1.72354	-1.22616	NA	0.555375	0.0836511	NA	-0.643041	NA	NA	NA	0.0663239	-0.768898	-2.57398	NA	-0.896954	-0.112716	-1.38483
ccle_broad_2019	COLO678_LARGE_INTESTINE	-0.12309	0.0131516	NA	NA	NA	NA	1.05911	0.982597	0.735596	-0.548403	-0.632422	NA	-0.137845	-0.367246	NA	1.31892	1.86768	NA	NA	NA	NA	1.28847	1.85488	0.507973	-0.83819	0.0703234	NA	1.43822	0.328789	-0.302519	0.277224	0.620452	1.2505	NA	0.760946	NA	NA	-1.10618	1.36074	NA	NA	0.969383	1.294	-0.0942584	NA	0.0616498	0.61372	-0.130044
ccle_broad_2019	JMSU1_URINARY_TRACT	-0.12176	0.714083	NA	NA	NA	NA	NA	0.635496	NA	-0.633323	1.44935	NA	0.7691	NA	0.53231	-0.156666	NA	NA	NA	NA	NA	NA	0.847748	0.291151	-0.614314	1.54376	NA	0.209826	1.10091	-0.199557	0.607286	0.605199	NA	NA	-0.492637	NA	NA	1.46879	NA	NA	NA	-0.026865	0.579607	NA	NA	0.649728	NA	-0.238226
ccle_broad_2019	ISHIKAWAHERAKLIO02ER_ENDOMETRIUM	-0.118129	-0.223394	0.0502081	NA	NA	NA	NA	NA	NA	-0.635767	0.0307606	NA	0.728226	-0.596361	-0.597307	NA	-0.42229	NA	NA	NA	NA	-0.15448	-0.920869	-0.340774	-0.547559	0.860265	NA	0.175812	-0.748654	0.345747	NA	-0.433213	NA	NA	0.122182	NA	NA	NA	NA	NA	NA	0.129898	0.643194	NA	NA	1.32013	0.304852	0.700572
ccle_broad_2019	NCIH1581_LUNG	-0.116918	0.864409	-0.52192	NA	NA	NA	-0.683064	-0.610833	-2.07753	-0.684144	-1.17479	NA	-0.603428	-0.155448	1.20337	NA	-0.633051	NA	0.8101	NA	NA	-0.797104	-0.279125	-1.28095	0.266493	-0.791219	NA	0.490183	1.24784	-0.171136	-0.614997	0.675018	0.54184	0.578481	-0.571353	NA	NA	-1.00814	NA	NA	NA	-0.749509	-0.837494	-0.911047	NA	-1.18697	0.805312	-0.91657
ccle_broad_2019	MDST8_LARGE_INTESTINE	-0.112172	0.00565203	NA	NA	NA	NA	1.00084	-0.773029	0.0383498	0.71327	0.513881	NA	-0.345976	-0.779504	-0.199402	0.567125	NA	NA	NA	NA	NA	NA	0.548955	0.0323044	0.681785	NA	NA	0.457742	1.90232	-0.94677	NA	0.697512	NA	NA	1.09275	NA	NA	-0.39878	NA	NA	NA	0.0973861	0.992332	-0.251561	NA	-0.122333	NA	NA
ccle_broad_2019	CAKI1_KIDNEY	-0.0962433	-0.540787	-0.278098	-0.673465	NA	NA	-1.24794	-1.9245	-1.36276	0.319097	-1.47331	NA	-1.41703	-1.29306	-1.70498	1.23961	-1.09404	NA	-0.0813211	NA	NA	0.787232	0.396217	-0.396475	-0.168794	-3.84845	NA	-0.734857	0.499534	-2.08071	NA	-0.975407	NA	NA	-1.93418	NA	NA	-0.213186	NA	NA	NA	0.594528	-0.885025	-0.990796	NA	-2.92889	0.656774	1.12723
ccle_broad_2019	SNU1105_CENTRAL_NERVOUS_SYSTEM	-0.093116	-0.780215	1.54297	NA	NA	NA	0.330952	-0.600039	-1.29231	-0.623294	0.676134	NA	-0.559513	NA	0.597948	-0.298325	-0.673036	NA	NA	NA	NA	0.124037	-0.603764	-0.281203	-0.992701	0.800173	NA	-0.563303	-0.0970505	-1.1169	0.0945812	-0.56066	-0.10403	NA	0.259168	NA	0.512542	-0.149342	NA	NA	NA	-0.580095	-0.192292	-0.863004	NA	-0.822296	NA	1.14717
ccle_broad_2019	IM95_STOMACH	-0.0836222	0.550942	-0.329965	NA	NA	NA	-1.59574	0.0844279	NA	-0.506228	-1.34404	-0.235137	0.472558	-2.34532	0.0905103	-0.0721756	0.770558	NA	NA	NA	NA	-0.100666	-1.42288	2.17996	0.696158	-0.865145	NA	-0.701816	0.127065	-0.070601	1.13187	-0.719851	0.286141	NA	0.129187	NA	0.830989	1.35261	NA	NA	NA	-0.188616	-1.89811	-2.40469	NA	-0.0768673	-0.533243	-1.81871
ccle_broad_2019	SKLU1_LUNG	-0.0659665	-0.0284003	1.0151	NA	NA	NA	NA	NA	NA	-0.729237	-0.24597	NA	-0.0682339	-0.800901	0.499784	NA	0.866513	NA	NA	NA	NA	0.664961	0.135879	-0.987693	0.293201	-0.23112	NA	-0.273291	0.253475	-0.0202571	NA	-0.428899	NA	NA	-0.692169	NA	NA	NA	NA	NA	NA	2.05798	0.0204266	NA	NA	1.06634	-0.0272052	0.120312
ccle_broad_2019	DV90_LUNG	-0.0641487	-0.735533	-0.627367	NA	NA	NA	0.817199	0.399919	1.60418	-0.0550572	-1.20357	NA	-0.632821	-0.432372	NA	-0.0644451	-1.48343	-0.332119	NA	NA	NA	0.196025	-0.645171	1.21257	0.857174	0.894824	NA	1.12396	-0.197645	-0.258765	-1.07787	0.263352	0.30972	NA	-0.440175	NA	-0.771551	0.0132465	-1.17769	NA	NA	0.529887	-2.50301	-1.03582	NA	0.252307	-0.781032	-0.191073
ccle_broad_2019	KYSE410_OESOPHAGUS	-0.0628115	-1.17348	-0.994233	-0.309398	NA	NA	0.181987	-0.0285428	-0.13184	0.0198483	-0.403406	NA	0.278338	NA	0.176544	NA	NA	NA	NA	NA	NA	NA	1.55722	0.366077	-0.72851	-0.0264151	NA	-0.498292	-0.31526	-0.511255	NA	0.29125	-0.278861	0.261055	-0.710475	-0.254618	NA	NA	NA	NA	NA	0.857788	1.91551	0.76573	NA	0.523392	NA	0.583533
ccle_broad_2019	PATU8988T_PANCREAS	-0.0615325	-0.276912	NA	NA	NA	NA	0.52903	-0.546577	-0.334738	-0.329121	-0.450872	NA	-0.0754503	0.830544	-0.0654049	-0.120992	NA	NA	NA	NA	NA	NA	0.104496	-0.0841096	-0.0902205	NA	NA	0.210416	0.100458	-0.692089	NA	0.428275	NA	NA	0.541459	NA	NA	-0.177074	NA	NA	NA	-0.0641891	0.0924444	-0.448948	NA	-1.00596	NA	NA
ccle_broad_2019	TYKNU_OVARY	-0.0586081	-0.371819	-0.682473	NA	NA	NA	NA	-0.702714	NA	-0.162491	-0.951495	NA	0.07771	0.217311	NA	0.159273	-1.12024	NA	NA	NA	-0.399595	NA	-0.409812	NA	0.301255	0.24106	NA	0.342726	-0.171033	-0.762519	-0.474532	1.06665	-0.306372	-0.144295	-0.510469	NA	NA	NA	NA	NA	NA	0.824108	-1.16925	0.313871	NA	-1.0839	NA	0.044786
ccle_broad_2019	NCIH1355_LUNG	-0.0546044	-1.1687	NA	NA	NA	NA	0.163095	-1.08223	-1.02038	0.168674	-0.942018	NA	-1.34025	-0.289544	NA	NA	NA	NA	NA	NA	NA	0.0890085	-0.02526	-0.000165833	-0.36211	0.123372	NA	0.263768	-0.259126	-1.15626	0.337655	0.204588	NA	NA	-2.11122	NA	NA	-0.724799	NA	NA	NA	-0.487566	0.605563	-0.136273	NA	-0.378116	NA	0.249777
ccle_broad_2019	L33_PANCREAS	-0.0413338	0.329065	-0.758249	NA	NA	NA	-0.342472	0.433255	NA	-0.753633	2.07094	-0.945867	NA	NA	NA	-0.813539	-0.948177	NA	NA	NA	NA	0.344681	-0.53327	-3.08568	-0.233773	NA	NA	-2.09418	-0.50124	2.49207	1.87666	-1.06006	NA	NA	1.79243	NA	NA	1.06583	NA	NA	NA	0.307462	-0.829778	0.827759	NA	2.21942	NA	0.556105
ccle_broad_2019	NCIH2170_LUNG	-0.0395162	0.614109	0.295791	NA	NA	NA	0.722993	4.87476	0.458323	0.611913	-0.457749	NA	0.239001	-0.181741	NA	0.0181056	1.5703	0.883272	NA	NA	NA	-0.409629	1.13889	1.05864	0.526461	0.720247	NA	-0.275026	-1.33483	0.214803	-0.0185294	1.6039	0.242857	NA	0.227549	NA	-1.34671	-1.00714	-0.579373	NA	NA	-0.231085	0.646439	-0.826397	NA	0.474757	-0.332837	-0.609067
ccle_broad_2019	KYSE450_OESOPHAGUS	-0.0242692	0.174269	-0.877869	NA	NA	NA	0.127859	0.221642	0.230094	1.05492	0.0708944	NA	0.755741	1.15611	NA	NA	-0.12811	-1.48222	NA	NA	NA	-0.117858	0.77864	0.00580621	-0.526071	0.508619	NA	0.101159	-0.284587	0.386078	0.367683	0.635327	NA	NA	0.21276	NA	NA	-0.0367826	NA	NA	NA	0.196949	1.28582	1.16066	NA	-0.451047	0.759127	-0.640518
ccle_broad_2019	RERFLCMS_LUNG	-0.020508	-0.495385	0.313515	NA	NA	NA	0.042595	-0.0567267	NA	-0.116423	0.5409	NA	NA	NA	-0.369104	NA	2.19199	NA	NA	NA	-0.0870979	NA	-0.0802646	0.180757	-0.437849	-0.132187	NA	0.0807478	0.361248	0.579226	-0.123387	-0.437757	-1.06718	-0.129396	0.48258	NA	-0.152243	NA	NA	NA	NA	-0.477393	0.466268	0.271242	NA	0.290462	NA	0.0244572
ccle_broad_2019	KYM1_SOFT_TISSUE	-0.0155286	1.22896	-1.30281	-1.15902	NA	NA	-0.304331	-0.804118	0.362635	2.05346	-0.634554	NA	-0.800269	NA	1.13095	NA	NA	NA	NA	NA	NA	NA	0.638355	1.62306	0.444402	-1.05978	NA	0.0760601	1.88087	-1.48014	NA	-0.298069	1.82296	-1.67802	-0.053382	-0.299156	NA	NA	NA	NA	NA	0.556445	-0.831294	-0.607459	NA	-1.27028	NA	-0.48438
ccle_broad_2019	ABC1_LUNG	-0.00386209	0.724389	NA	NA	NA	NA	0.110941	-0.675242	1.21781	0.188368	-1.48436	1.03195	-0.222591	NA	0.0952146	NA	-2.28504	0.197785	NA	NA	-0.596183	NA	1.13468	0.564284	-0.809066	-0.681202	NA	0.569179	-0.772575	-0.722277	-0.999085	0.277284	NA	1.04368	NA	NA	-0.588104	-0.605106	NA	NA	NA	1.17336	0.165981	-1.49332	NA	1.014	1.90513	0.969711
ccle_broad_2019	OCILY3_HAEMATOPOIETIC_AND_LYMPHOID_TISSUE	0.00307964	-0.213024	-2.17644	2.25235	NA	NA	2.50168	0.00829475	0.330868	0.441457	-0.308059	NA	0.45271	-0.934768	-2.10697	0.330359	1.20526	NA	-0.394175	NA	NA	0.38182	-0.0218252	-1.25163	-0.0636172	1.48859	NA	1.15513	-1.68972	0.342591	NA	-0.514938	NA	NA	0.993509	NA	NA	-2.37867	NA	NA	NA	0.821148	-1.96671	-2.35098	NA	2.46178	-0.628949	-2.26813
ccle_broad_2019	KNS42_CENTRAL_NERVOUS_SYSTEM	0.00551484	-0.008461	NA	NA	NA	NA	NA	2.0533	-0.382571	-0.723213	-0.344572	NA	0.119248	NA	NA	NA	NA	NA	NA	NA	NA	2.41551	-1.80567	-0.954355	-2.0301	-0.566658	NA	-2.15663	0.974488	-0.178776	NA	-2.15385	NA	NA	NA	NA	NA	NA	1.01064	NA	NA	-1.27322	0.668608	NA	NA	-0.000615297	NA	2.61486
ccle_broad_2019	NCIH358_LUNG	0.00575281	-0.489783	-1.27805	NA	NA	NA	-0.471355	0.255622	NA	-0.177152	0.13835	NA	0.299088	NA	0.17755	NA	1.39797	NA	NA	NA	-0.762435	NA	0.273549	0.104468	-0.737439	-0.0938102	NA	-0.790297	-0.370738	-0.412219	-0.0969711	-0.917797	0.446601	NA	-0.483307	NA	1.97811	-0.719998	NA	NA	NA	2.16428	-1.03389	-0.808602	NA	0.5387	-0.532447	0.153103
ccle_broad_2019	RVH421_SKIN	0.00635033	0.126589	0.0183179	NA	NA	NA	-0.311119	-0.243272	NA	0.340915	0.707578	0.530992	-1.32887	0.216071	-1.01129	NA	-0.673201	NA	NA	NA	0.742905	NA	1.3606	0.14633	-0.125476	0.505298	NA	1.78754	1.38385	-1.21715	-1.11073	0.634362	0.0171326	NA	0.025053	1.21307	-0.283142	-0.417218	NA	NA	NA	0.454327	0.397535	-1.59673	NA	-1.02253	NA	-0.129863
ccle_broad_2019	CAL27_UPPER_AERODIGESTIVE_TRACT	0.0113469	0.645367	0.352763	NA	NA	NA	-0.262761	1.25459	2.30482	-0.0543416	0.489753	NA	0.466229	NA	0.40995	-0.494069	0.352732	NA	NA	NA	NA	-0.046426	-0.267089	-0.0963566	-0.16621	-0.425051	NA	-0.276828	-0.030071	0.949831	0.170827	0.857979	0.639713	NA	0.166531	NA	0.719643	0.576908	NA	NA	NA	-0.219406	0.599933	0.83741	NA	0.675205	NA	-0.160744
ccle_broad_2019	NCIH520_LUNG	0.0183773	NA	NA	NA	NA	NA	NA	NA	NA	-1.9072	0.820418	NA	NA	NA	1.19682	NA	0.994245	NA	NA	NA	NA	-1.06486	-1.52727	-1.47725	-1.52401	NA	NA	-0.902556	-2.36264	0.896338	-0.123918	NA	NA	NA	-0.0452816	NA	-0.845021	0.671004	NA	NA	NA	-0.490469	-1.62463	NA	NA	-1.54711	NA	0.156964
ccle_broad_2019	CAOV3_OVARY	0.0203367	-0.632856	NA	NA	NA	NA	NA	0.393615	NA	-0.635478	-0.620618	NA	0.138063	NA	-1.1375	0.245231	NA	NA	NA	NA	NA	NA	-0.847504	0.453248	0.0902188	-0.508482	NA	-0.479439	0.294789	-0.417467	0.563405	-0.52234	NA	NA	-0.661618	NA	NA	0.108785	NA	NA	NA	1.40487	0.873663	NA	NA	-0.222227	NA	1.03592
ccle_broad_2019	HCT116_LARGE_INTESTINE	0.0353896	-0.0229726	NA	NA	NA	NA	0.0987305	0.387981	-0.129699	-0.0565389	0.520904	-0.242537	0.611249	NA	0.0914282	NA	0.74044	-0.536426	NA	NA	0.05283	NA	-0.141814	0.251277	0.852857	1.10705	NA	-0.125679	0.279447	-0.322133	0.00228351	0.166215	NA	-1.00464	NA	NA	0.596868	-0.0578748	NA	NA	NA	0.854989	-0.318916	-0.530647	NA	-0.229418	0.602826	-1.12814
ccle_broad_2019	NUDHL1_HAEMATOPOIETIC_AND_LYMPHOID_TISSUE	0.0378372	0.176138	-0.376545	1.33272	NA	NA	2.16705	-0.0849214	-0.29692	0.440123	1.91538	NA	0.951412	0.463048	-3.03471	0.50419	-0.470745	NA	0.384771	NA	NA	0.343601	0.249415	1.04346	1.6329	2.19394	NA	1.69774	-1.16539	0.345541	NA	1.55407	NA	NA	0.593846	NA	NA	1.46349	NA	NA	NA	1.64464	-0.367273	-0.518538	NA	-0.441726	-0.985876	-1.93592
ccle_broad_2019	KP4_PANCREAS	0.039819	0.0859791	-2.24869	NA	NA	NA	0.441206	0.445859	-0.0681314	-1.25014	-0.320903	NA	0.405421	-0.613252	-0.0331634	0.296209	2.62023	NA	NA	NA	NA	-0.379777	0.35772	0.502676	0.241626	-0.0759473	NA	-0.68657	-0.83135	0.238151	NA	-0.874909	-0.338536	0.946983	1.16767	NA	NA	NA	NA	NA	NA	-0.59256	-0.811281	-1.14108	NA	-0.456514	0.360189	-0.347966
ccle_broad_2019	MSTO211H_PLEURA	0.0400754	-0.446734	NA	NA	NA	NA	NA	0.909283	0.167157	2.16495	0.75063	NA	-0.327388	NA	NA	NA	NA	NA	NA	NA	NA	2.22039	1.27632	0.769811	0.687748	0.0800272	NA	1.54109	0.903323	-1.13446	NA	-0.125768	NA	NA	NA	NA	NA	NA	0.0633715	NA	NA	0.0971918	1.28321	NA	NA	0.454928	NA	-1.12667
ccle_broad_2019	MOLM13_HAEMATOPOIETIC_AND_LYMPHOID_TISSUE	0.0404354	0.762637	1.44094	NA	NA	NA	-0.719633	NA	NA	-0.376247	1.50228	NA	-0.33469	NA	1.05228	-0.070101	-1.55061	NA	NA	NA	NA	1.69777	-1.41613	-1.3091	-1.12232	0.196149	NA	-0.0271412	-3.05621	-1.20385	2.03275	1.04763	1.06657	-0.826542	-2.85162	-0.812554	NA	NA	-4.08714	NA	NA	0.0511513	-0.44726	2.75169	NA	0.101261	2.25496	NA
ccle_broad_2019	TE14_OESOPHAGUS	0.0552455	0.847372	1.0151	NA	NA	NA	0.245491	0.34559	0.45705	0.664641	0.909606	NA	-0.622593	0.314469	NA	-0.537592	-1.01697	-0.351189	NA	NA	NA	1.02404	-0.456861	-0.856296	-0.614905	-0.375355	NA	0.573165	-0.988074	-0.23684	1.7808	0.965793	0.33916	NA	0.477167	NA	2.11489	0.966873	0.0881676	NA	NA	1.01345	-0.726494	0.00644977	NA	0.730795	0.639799	-0.476044
ccle_broad_2019	DANG_PANCREAS	0.0616126	0.138001	NA	NA	NA	NA	NA	-0.405729	1.35271	1.2073	-1.20023	NA	1.2518	NA	NA	NA	NA	NA	NA	NA	NA	-0.154882	0.795548	0.542024	-0.240118	-0.112099	NA	1.47295	0.754603	0.34346	NA	0.610798	NA	NA	NA	NA	NA	NA	0.397341	NA	NA	-0.671463	2.011	NA	NA	-0.0591876	NA	-0.0621735
ccle_broad_2019	CORL47_LUNG	0.06444	1.56658	0.766986	NA	NA	NA	0.312834	1.38547	NA	-0.942704	1.99619	NA	2.05465	NA	1.20355	NA	-0.973428	-0.248927	NA	NA	NA	-1.00511	-0.120224	0.124491	-0.808195	1.13136	NA	0.658971	0.230117	-0.639406	-0.178818	NA	-0.166707	1.07188	0.366869	1.33657	NA	0.227121	1.21238	NA	NA	-0.556745	0.560959	0.639889	NA	1.18414	NA	0.89288
ccle_broad_2019	MDAMB468_BREAST	0.0683963	1.96366	0.447883	NA	NA	NA	-0.00855946	0.349483	NA	-0.331973	-0.606306	NA	NA	NA	0.0501981	NA	-0.53955	NA	NA	NA	0.106456	NA	0.218846	0.205067	0.0206754	0.217715	NA	0.0231406	-0.273949	-0.0620196	0.205556	0.76984	0.337283	0.277184	-0.124233	NA	0.179723	NA	NA	NA	NA	0.580887	-0.189705	0.494446	NA	1.16877	NA	0.414947
ccle_broad_2019	OE33_OESOPHAGUS	0.0715427	NA	NA	NA	NA	NA	NA	NA	NA	-0.211872	0.465681	NA	NA	NA	0.42199	NA	2.47746	NA	NA	NA	NA	1.31044	0.176089	0.847216	2.13238	NA	NA	-0.208891	-0.135268	-0.083891	-0.074816	NA	NA	NA	0.344729	NA	-1.29742	-0.685405	NA	NA	NA	0.197214	1.25917	NA	NA	-1.59304	NA	0.39613
ccle_broad_2019	JHH5_LIVER	0.0832971	0.260706	NA	NA	NA	NA	-0.236633	0.0182856	-0.743995	-0.21206	-0.0371764	-0.0296302	0.205432	NA	-0.32354	NA	1.09205	0.134034	NA	NA	-0.0793041	NA	-0.463674	-0.446395	-0.590699	-0.567014	NA	-0.522029	0.0217521	0.802977	-0.091221	-0.243221	NA	-0.955536	NA	NA	-0.919268	0.388322	NA	NA	NA	-0.881175	-0.640854	0.630403	NA	0.547495	-1.46683	-0.296727
ccle_broad_2019	CAL33_UPPER_AERODIGESTIVE_TRACT	0.0902078	-0.350706	0.216777	NA	NA	NA	0.397491	0.0496742	1.15995	-0.18928	1.0652	NA	-0.0328176	NA	-0.130453	-0.296554	-0.056933	NA	NA	NA	NA	0.348122	-0.320428	0.132937	0.146278	0.417336	NA	-0.16845	0.356631	0.521618	0.553772	0.0949961	1.07495	NA	-1.98029	NA	0.370006	0.603937	NA	NA	NA	0.612117	1.51405	-0.306812	NA	-0.304945	NA	1.7555
ccle_broad_2019	PC3_PROSTATE	0.093373	0.0637599	2.89576	NA	NA	NA	0.174469	0.730906	-0.865107	-0.596652	0.0703172	NA	-0.851375	-0.0498163	NA	NA	0.509689	-1.12192	NA	NA	NA	0.0281927	-0.528279	0.765409	0.888954	-0.153708	NA	0.652663	0.0517518	0.00291705	-0.634924	-0.233753	NA	NA	0.948377	NA	NA	0.127269	NA	NA	NA	0.413727	0.995411	0.0190932	NA	1.41115	-0.900239	-0.81357
ccle_broad_2019	HT115_LARGE_INTESTINE	0.0947975	-0.230583	NA	NA	NA	NA	-0.409184	-0.0310748	-0.846315	1.1729	1.2952	0.546816	-0.274462	NA	-0.499888	NA	0.437921	0.282436	NA	NA	-0.193762	NA	-0.390818	-0.136215	1.78153	-1.4721	NA	0.584724	0.10659	-0.608442	1.16164	0.388653	NA	-0.13319	NA	NA	1.23548	-0.243227	NA	NA	NA	0.442816	0.0215534	-0.683175	NA	-0.439194	-0.662169	-0.369536
ccle_broad_2019	NCIH2228_LUNG	0.095893	0.115085	-0.0665346	NA	NA	NA	-0.580609	-1.03449	NA	-0.429937	-1.03952	-0.971728	NA	NA	NA	1.34447	0.828965	NA	NA	NA	NA	0.257404	-0.58201	1.02708	1.29914	NA	NA	-0.0709624	1.19872	0.627104	0.803551	-0.579895	NA	NA	1.37291	NA	NA	0.638804	NA	NA	NA	0.162441	-0.589297	1.16872	NA	0.279153	NA	-0.717214
ccle_broad_2019	HEC59_ENDOMETRIUM	0.0982247	0.366855	0.631355	0.967051	NA	NA	1.38771	NA	3.51055	-0.594385	-0.51115	NA	0.925197	-0.0115719	0.978652	0.215296	-0.208196	NA	NA	NA	NA	0.0969294	-0.242755	-1.23492	-1.62149	0.976278	NA	0.67727	0.122129	1.42393	-1.10612	-1.67355	0.377953	1.15689	0.656043	-0.590399	-0.397727	-0.00872952	-0.905171	NA	NA	-0.189628	-0.640411	1.22327	NA	0.950684	NA	-0.210977
ccle_broad_2019	NCIN87_STOMACH	0.106074	-0.56538	-0.40964	0.0124438	NA	NA	-0.0562556	NA	NA	-1.23511	0.644481	NA	0.477587	-0.295944	-0.0311341	NA	0.35476	0.296049	NA	NA	NA	-0.165524	-0.103758	-0.356669	-1.0951	-0.332147	NA	-0.510246	-1.0956	1.54591	0.302891	-1.42885	0.349012	0.650605	-0.37774	-0.764194	-0.132468	NA	NA	NA	NA	1.09644	-1.37814	1.51108	NA	1.27398	NA	0.554826
ccle_broad_2019	RT4_URINARY_TRACT	0.12754	0.136182	-1.27908	NA	NA	NA	NA	1.01066	0.555319	-1.61437	-0.367746	NA	1.15977	NA	0.861531	NA	1.3292	NA	NA	NA	NA	0.179896	0.385944	0.393746	0.795881	-0.594039	NA	-0.12155	-0.531038	1.08139	NA	0.535056	NA	NA	0.39932	NA	NA	NA	0.9583	NA	NA	0.608765	-1.18219	NA	NA	1.00148	NA	1.10461
ccle_broad_2019	KMS11_HAEMATOPOIETIC_AND_LYMPHOID_TISSUE	0.129092	1.11513	-0.538883	NA	NA	NA	-0.330323	0.0527019	NA	0.390414	0.725127	NA	1.89432	NA	0.95671	NA	-0.162057	NA	NA	NA	NA	-0.567955	0.233591	0.0709897	0.576598	0.747827	NA	-0.0430439	-0.429619	1.20607	NA	0.588634	NA	3.21559	0.584456	NA	NA	0.603315	NA	NA	NA	-0.523231	-0.866618	0.361675	NA	0.234407	0.0956374	-1.78382
ccle_broad_2019	DMS114_LUNG	0.129545	-0.00206204	-0.499197	NA	NA	NA	NA	0.725799	NA	1.14215	-0.975597	NA	-0.0780043	0.13324	NA	0.395865	0.618812	NA	NA	NA	0.511511	NA	0.366654	NA	-0.314999	0.65636	NA	1.57118	-0.585664	1.30861	0.276686	1.98023	-0.98209	1.72494	0.234795	NA	NA	NA	NA	NA	NA	-0.831851	0.710239	-0.267116	NA	0.48646	NA	-1.03435
ccle_broad_2019	CAL51_BREAST	0.129574	0.020423	0.553151	NA	NA	NA	0.429367	0.114024	NA	0.0738927	0.743383	NA	NA	NA	1.61958	NA	-0.114625	NA	NA	NA	-0.214205	NA	-0.405524	-0.352725	-1.09237	0.986914	NA	0.0269495	-0.0345478	0.612547	0.800518	-0.490126	1.71311	-0.219091	-0.00925147	NA	0.0441948	NA	NA	NA	NA	-0.695431	0.240262	-0.0822006	NA	0.596534	NA	0.149878
ccle_broad_2019	COV362_OVARY	0.131336	0.118956	NA	NA	NA	NA	-0.171076	-0.0465644	-0.0867237	-0.374816	0.375756	NA	0.0202038	-0.344946	-0.340905	-0.0597638	NA	NA	NA	NA	NA	NA	-1.39292	0.419227	0.042163	NA	NA	-0.955857	0.531813	-0.0360922	NA	0.472448	NA	NA	-2.04175	NA	NA	0.154349	NA	NA	NA	0.541216	-0.19118	0.288034	NA	0.148121	NA	NA
ccle_broad_2019	CL34_LARGE_INTESTINE	0.133687	-0.363765	-3.0636	-0.36368	NA	NA	0.49458	-1.22283	-1.67529	-0.465268	-0.619591	NA	-1.23155	NA	-1.67873	NA	NA	NA	NA	NA	NA	NA	-1.14362	0.773584	0.721323	-0.767422	NA	-0.939625	-1.03779	0.340907	NA	0.673507	-1.11916	-2.50515	-1.1383	-0.750679	NA	NA	NA	NA	NA	0.89985	-2.73137	-1.36977	NA	0.151186	NA	0.553933
ccle_broad_2019	BT549_BREAST	0.136802	NA	0.28268	NA	NA	NA	0.444382	NA	NA	0.426037	0.457156	NA	-0.906096	NA	NA	0.686174	0.366389	NA	NA	NA	NA	0.689761	0.499892	2.02982	0.66285	0.325901	NA	0.467484	0.876931	0.191924	0.305831	0.216872	NA	NA	-0.172914	NA	NA	-0.194836	NA	NA	NA	0.294735	1.52441	0.653143	NA	0.142301	NA	-0.984845
ccle_broad_2019	SW480_LARGE_INTESTINE	0.139348	NA	NA	NA	NA	NA	NA	NA	NA	-1.10048	0.306238	NA	NA	NA	0.0851394	NA	1.01803	NA	NA	NA	NA	-1.13409	-0.939603	0.533626	-1.07656	NA	NA	-0.185597	0.720811	-0.0191928	0.276288	NA	NA	NA	0.654779	NA	2.2855	-0.108638	NA	NA	NA	1.337	0.0623775	NA	NA	1.44092	NA	0.231306
ccle_broad_2019	RPMI8226_HAEMATOPOIETIC_AND_LYMPHOID_TISSUE	0.143893	0.969702	0.489018	0.33186	NA	NA	-1.36451	-1.08297	-1.0244	1.58175	0.51945	NA	0.39297	NA	1.23906	0.597455	1.63986	NA	NA	NA	NA	-0.784854	0.238864	-0.398937	0.177886	0.975038	NA	1.97009	-2.18262	1.55595	-0.164065	-0.714719	NA	0.72723	0.540688	NA	NA	NA	1.56151	NA	NA	-1.37035	1.3618	0.880753	NA	-0.625549	2.55198	-1.27796
ccle_broad_2019	HS294T_SKIN	0.152007	0.139641	NA	NA	NA	NA	NA	-0.385153	NA	-0.211316	-0.0310292	NA	-0.29303	NA	0.808319	0.868025	NA	NA	NA	NA	NA	NA	0.094196	0.0362081	-0.03728	-0.0255429	NA	1.05832	0.870028	0.106834	-0.473462	-0.13793	NA	NA	0.465751	NA	NA	-0.222153	NA	NA	NA	-0.276267	0.306847	NA	NA	1.08918	NA	-0.242482
ccle_broad_2019	WM115_SKIN	0.165937	0.534246	NA	NA	NA	NA	0.196367	0.429602	-0.438761	-0.193226	-0.0906753	0.509479	1.89991	NA	-0.233882	NA	-1.78251	NA	NA	NA	NA	0.934002	1.33809	-0.229394	-0.434184	0.0899916	NA	1.04696	1.60662	-1.45329	NA	0.481596	NA	NA	0.769073	NA	NA	NA	NA	NA	NA	-0.924753	-0.289551	-0.126082	NA	-0.180429	-0.542954	0.858965
ccle_broad_2019	SNU719_STOMACH	0.172584	-1.64419	NA	NA	NA	NA	0.840327	0.311484	0.0700098	-1.02029	-0.580634	0.0747822	1.87042	NA	-0.977149	NA	1.46628	NA	NA	NA	NA	-1.39596	0.298429	0.882597	2.49612	-0.848938	NA	-1.86634	-0.526846	0.906298	NA	0.229396	NA	NA	-0.285053	NA	NA	NA	NA	NA	NA	1.32263	-1.2596	-1.38258	NA	1.64505	1.49491	0.0942776
ccle_broad_2019	A375_SKIN	0.186849	-0.190509	NA	NA	NA	NA	-0.254049	-0.100192	-0.791067	0.0591975	0.189831	NA	-0.0207155	1.19567	0.0101236	0.629692	NA	NA	NA	NA	NA	NA	0.635003	-0.117142	0.171476	NA	NA	0.481344	0.440787	0.380662	NA	0.05556	NA	NA	0.514446	NA	NA	0.433993	NA	NA	NA	-0.255038	-0.190204	0.356142	NA	0.147935	NA	NA
ccle_broad_2019	SW403_LARGE_INTESTINE	0.190114	NA	-0.347354	NA	NA	NA	-0.217879	NA	NA	0.209071	-0.274792	NA	-0.261869	NA	NA	0.59592	0.0479683	NA	NA	NA	NA	-0.413897	0.199446	-1.61795	-0.207845	0.32922	NA	0.330953	0.101027	-0.646024	0.566736	-0.506935	NA	NA	-0.689002	NA	NA	0.11834	NA	NA	NA	0.0273186	-1.1902	0.329638	NA	-0.84973	NA	0.788562
ccle_broad_2019	CORL23_LUNG	0.191394	0.930023	NA	NA	NA	NA	-1.35748	0.570698	-0.428047	0.00752173	1.49332	-0.0296963	-1.37966	NA	0.708699	NA	0.309463	NA	NA	NA	NA	-0.474942	-1.01957	0.0381381	0.165133	0.17401	NA	-0.0291464	1.10867	1.9147	NA	-0.55788	NA	NA	-0.453568	NA	NA	NA	NA	NA	NA	0.0963845	-1.57401	-0.0758214	NA	0.295477	-1.08184	0.548359
ccle_broad_2019	KMRC20_KIDNEY	0.201833	0.241472	NA	NA	NA	NA	NA	0.197719	NA	0.0893598	-0.0048456	NA	0.281864	NA	-0.574069	-0.105744	NA	NA	NA	NA	NA	NA	0.168595	0.243734	0.167984	-0.807225	NA	-0.289994	0.174813	0.800633	0.331923	0.120142	NA	NA	-1.25367	NA	NA	-0.66898	NA	NA	NA	0.0901858	-1.05696	NA	NA	-0.667242	NA	-0.232373
ccle_broad_2019	HGC27_STOMACH	0.210918	1.0515	0.375641	NA	NA	NA	1.07991	-0.581225	NA	1.31034	0.251289	NA	-1.11898	NA	2.50299	NA	-2.81593	NA	NA	NA	-0.424249	NA	-0.839066	-0.129445	0.193225	-0.166312	NA	-0.693311	0.661688	-0.874041	-0.253558	1.6826	-0.26397	NA	0.323182	NA	-0.392969	-0.399113	NA	NA	NA	-0.932214	0.492951	1.25787	NA	-0.778475	0.0507337	0.405393
ccle_broad_2019	KMS12BM_HAEMATOPOIETIC_AND_LYMPHOID_TISSUE	0.215001	1.16862	-0.142749	NA	NA	NA	-3.51506	NA	NA	1.47175	-0.465437	NA	1.08908	NA	-0.552187	-0.147309	-0.0226663	NA	NA	NA	NA	-0.923233	0.270588	-1.27365	0.490777	1.21062	NA	1.46054	-1.93315	1.46928	0.151533	-0.0373774	0.702088	1.42329	0.976387	-0.334966	NA	NA	1.29715	NA	NA	0.997083	-1.48488	-2.4023	NA	0.388241	-1.10836	NA
ccle_broad_2019	HEPG2_LIVER	0.21941	-0.561286	NA	NA	NA	NA	NA	0.269728	NA	-0.559492	0.0304298	NA	-0.888804	NA	0.453412	-1.00894	NA	NA	NA	NA	NA	NA	-0.356048	-0.559228	0.0933955	-0.00375285	NA	-1.13513	-1.26602	0.431164	0.0249918	-0.733037	NA	NA	0.535273	NA	NA	-0.577997	NA	NA	NA	-0.684252	-0.879837	NA	NA	-0.547488	NA	-0.754066
ccle_broad_2019	HEC1A_ENDOMETRIUM	0.222735	-1.17709	-0.674369	NA	NA	NA	-0.0227645	0.491184	0.760822	0.0124171	-0.889609	NA	0.787597	NA	-0.0483808	-0.145205	-0.161368	NA	NA	NA	NA	0.130546	-0.299404	0.301704	0.149849	0.305742	NA	0.126009	0.126843	0.183574	-0.0650975	-0.64414	-0.881579	NA	0.671433	NA	0.171868	0.108917	NA	NA	NA	1.22571	-0.17736	0.476646	NA	1.20352	NA	-0.120086
ccle_broad_2019	COLO320_LARGE_INTESTINE	0.22443	1.57743	0.510046	NA	NA	NA	-1.15374	0.068335	0.307379	0.803016	-0.493807	NA	0.834152	-0.0422526	-0.631923	NA	-1.5793	NA	-0.113863	NA	NA	-0.331162	0.921343	0.652139	0.401495	1.64477	NA	1.83477	-1.11659	0.695754	0.280047	1.49999	0.0740997	1.16534	0.619591	NA	NA	-1.09419	NA	NA	NA	-0.179948	-1.66552	-0.847924	NA	1.62661	0.0244279	-1.68259
ccle_broad_2019	LS180_LARGE_INTESTINE	0.266313	-0.885616	-1.06478	NA	NA	NA	0.633846	NA	NA	-0.532876	-0.332474	NA	-0.149583	NA	-0.480959	-0.0635656	0.839063	NA	NA	NA	NA	-0.627386	-0.125879	1.0793	1.15757	-0.926585	NA	-0.611702	-0.726247	0.178885	-0.870091	-0.770855	-0.448465	-0.337873	0.0940979	-0.346619	NA	NA	0.387176	NA	NA	1.0536	-2.25831	-0.125532	NA	0.754822	-0.635506	NA
ccle_broad_2019	A204_SOFT_TISSUE	0.26789	0.290975	0.373003	NA	NA	NA	NA	-0.674181	NA	0.558574	0.786326	NA	-0.387203	NA	-0.318306	0.593072	-1.21185	NA	NA	NA	-0.961583	-0.0771637	0.89522	-2.64854	0.862646	0.197081	NA	-0.00846193	0.451062	-1.19749	NA	-0.347577	-0.039567	NA	-0.898922	0.0720821	NA	-1.1059	NA	NA	NA	-0.6691	0.71373	0.453255	NA	0.186017	-0.513731	0.820201
ccle_broad_2019	NCIH650_LUNG	0.270951	0.153167	0.942498	-1.08708	NA	NA	0.246749	NA	0.131959	1.42038	0.221207	NA	0.967227	NA	0.367225	NA	1.49309	NA	NA	NA	-0.253411	-0.532215	0.562245	0.339934	-0.280475	-0.556418	NA	-0.439663	0.647202	-0.503675	NA	-0.386809	-0.979816	0.0564825	-0.307898	NA	NA	-0.438609	NA	NA	NA	-0.839598	0.076339	0.0204902	NA	0.0818769	1.06435	0.711085
ccle_broad_2019	KMS27_HAEMATOPOIETIC_AND_LYMPHOID_TISSUE	0.276956	1.30257	-1.9524	NA	NA	NA	0.0757258	-0.114149	-1.52986	0.764674	-0.163974	NA	0.168952	NA	-0.538939	0.0954112	0.606441	NA	NA	NA	NA	0.205071	0.639331	-0.0769254	1.66476	-0.163578	NA	0.49111	0.0441877	0.845228	-1.45603	0.840588	0.610069	NA	2.36467	NA	-1.38457	-0.218572	NA	NA	NA	-1.90147	-0.74102	-0.17371	NA	-0.199534	NA	-2.13653
ccle_broad_2019	WM793_SKIN	0.283169	0.194788	NA	NA	NA	NA	0.31714	-1.23872	-0.590042	-0.59526	0.142936	NA	1.07947	-0.424386	NA	NA	NA	NA	NA	NA	NA	0.121175	0.62491	-0.390209	-1.28284	-0.080374	NA	0.106362	0.503927	-1.85629	1.12665	-0.534184	NA	NA	0.530311	NA	NA	-0.637899	NA	NA	NA	-0.794127	-1.2368	-0.560152	NA	-0.459983	NA	-0.133747
ccle_broad_2019	HEL9217_HAEMATOPOIETIC_AND_LYMPHOID_TISSUE	0.283418	-0.00679143	-0.214539	NA	NA	NA	-1.10546	NA	NA	-1.32473	-0.457341	NA	0.723686	NA	-1.69033	0.0854843	1.19453	NA	NA	NA	NA	-0.225733	0.537016	1.15344	1.00352	1.06234	NA	0.402228	-1.90787	0.201386	0.229231	-0.432461	0.393858	1.18988	0.0953573	NA	-1.23767	1.58566	NA	NA	NA	1.07479	-0.884654	-1.32501	NA	1.13621	0.566036	-2.11972
ccle_broad_2019	SKMEL2_SKIN	0.284358	-0.0453589	0.349655	NA	NA	NA	0.856088	1.43644	NA	-0.183856	-0.0344942	-0.245105	0.369022	-0.652522	0.598446	NA	-0.89129	NA	NA	NA	0.0703258	NA	-0.19876	-0.284603	0.401038	0.567922	NA	0.372978	0.257955	-0.830501	0.0590836	0.832969	0.138644	NA	-0.218698	1.23045	0.809819	-0.725951	NA	NA	NA	-0.573081	-0.0181884	0.720717	NA	-0.11026	NA	-0.738076
ccle_broad_2019	HEL_HAEMATOPOIETIC_AND_LYMPHOID_TISSUE	0.294009	2.1994	-0.167203	NA	NA	NA	NA	-0.50502	NA	0.698867	0.147145	NA	0.0490993	NA	-0.545218	-0.168945	1.19756	NA	NA	NA	-0.260656	-0.059545	0.165281	1.12079	0.835638	1.19265	NA	1.84257	-2.50633	0.241105	NA	0.482226	-0.251199	NA	0.708083	0.152488	NA	1.38378	NA	NA	NA	1.15062	-1.07347	-0.469574	NA	1.55796	0.631615	-2.08183
ccle_broad_2019	NCIH2110_LUNG	0.299188	NA	NA	NA	NA	NA	NA	NA	NA	-0.630751	1.47807	NA	NA	NA	0.309662	NA	-0.759918	NA	NA	NA	NA	-0.981272	0.598766	-0.0484246	2.04869	NA	NA	1.01413	0.416282	-0.530674	0.560168	NA	NA	NA	0.738035	NA	-0.526061	0.070362	NA	NA	NA	-0.274847	-0.0126824	NA	NA	0.13149	NA	0.887055
ccle_broad_2019	SW837_LARGE_INTESTINE	0.301853	0.400687	1.19036	-0.671399	NA	NA	0.732214	-0.202975	0.0312201	-1.29601	0.510468	NA	-0.32906	NA	0.029191	0.104791	0.144501	NA	NA	NA	NA	0.326619	0.343871	0.50746	-0.312693	-0.925351	NA	0.22076	-1.04111	0.921933	-0.162498	-0.498265	NA	0.400416	0.220129	NA	NA	NA	0.255335	NA	NA	1.28218	-1.15832	-0.0430267	NA	0.31535	-1.49982	0.0630795
ccle_broad_2019	MIAPACA2_PANCREAS	0.305146	NA	NA	NA	NA	NA	NA	NA	NA	-1.18213	1.63072	NA	NA	NA	-0.302136	NA	0.177404	NA	NA	NA	NA	-1.05533	-2.95328	-2.0583	-1.19485	NA	NA	-1.35841	0.106791	1.92554	1.15514	NA	NA	NA	-2.21304	NA	0.73311	0.943675	NA	NA	NA	-1.04432	-1.25283	NA	NA	0.878296	NA	-0.370942
ccle_broad_2019	PC14_LUNG	0.310907	-0.11166	-0.049087	NA	NA	NA	0.56519	0.573388	NA	0.780555	0.302104	0.55234	0.362049	0.536036	0.824444	NA	0.0645259	NA	NA	NA	-0.536847	NA	-0.237164	-0.0730867	-0.572044	-0.818594	NA	-0.984776	-0.688932	0.601144	-0.362869	-0.372462	1.33305	NA	0.711612	-1.26714	1.13457	1.27748	NA	NA	NA	-0.413776	0.197937	1.18906	NA	-0.231312	NA	1.5436
ccle_broad_2019	BT20_BREAST	0.32088	-1.1515	0.418761	NA	NA	NA	-0.222391	1.54024	-0.0691691	1.56309	-0.950161	NA	-0.592485	1.34967	0.195242	0.0585767	-1.02843	NA	NA	NA	NA	-0.355284	0.32558	0.560947	-1.90222	-1.68361	NA	0.545437	1.39062	-1.58664	NA	0.0619336	-0.358032	-0.129586	-0.51777	NA	NA	NA	NA	NA	NA	0.71612	-0.0258194	0.193849	NA	-1.13517	1.24854	1.74854
ccle_broad_2019	U87MG_CENTRAL_NERVOUS_SYSTEM	0.323394	-0.100992	-0.385703	NA	NA	NA	0.431051	-0.535136	NA	0.59828	-0.843615	0.281903	-1.436	-0.167856	-1.47804	0.472221	0.173732	NA	NA	NA	NA	2.02407	-0.0383851	1.62746	-0.781264	-0.618865	NA	0.0424758	0.475553	-1.40788	-0.975513	-0.831964	-1.29064	NA	-0.790568	NA	0.0108564	-0.844917	NA	NA	NA	-0.640462	-0.833549	-0.154448	NA	-1.19557	-0.380321	0.341424
ccle_broad_2019	SNU685_ENDOMETRIUM	0.325175	0.166193	-0.294752	NA	NA	NA	0.0371008	NA	NA	0.650571	-0.317522	NA	-0.750699	NA	-0.0381322	0.402771	-0.464962	NA	NA	NA	NA	-1.20044	0.508068	0.418806	-0.0518015	-0.509985	NA	0.757675	0.290893	-0.522829	0.110688	0.0649084	-0.835898	0.235678	0.653038	NA	0.61534	0.216302	NA	NA	NA	-0.297504	1.51476	-0.884669	NA	-1.28601	0.470713	0.601856
ccle_broad_2019	SW48_LARGE_INTESTINE	0.33261	NA	0.772852	NA	NA	NA	0.187936	NA	NA	0.0241508	0.359033	NA	0.793559	NA	NA	0.454823	0.00503539	NA	NA	NA	NA	-0.213547	0.347614	1.07687	0.338603	-0.0824005	NA	0.230663	-0.336542	-0.0564456	0.718199	0.402099	NA	NA	0.370053	NA	NA	1.20591	NA	NA	NA	0.884192	0.541427	1.65824	NA	0.178403	NA	-0.0747687
ccle_broad_2019	NCIH446_LUNG	0.346423	0.43627	-0.129776	-0.326034	NA	NA	-0.360787	1.56775	-0.01108	0.0230291	0.368939	NA	0.367234	NA	1.16012	NA	NA	NA	NA	NA	NA	NA	-0.452235	-0.130298	-0.282189	0.53807	NA	-0.240435	0.0242773	-0.49112	NA	0.565873	-1.12496	1.8383	0.0414517	0.401005	NA	NA	NA	NA	NA	0.0480349	1.03342	1.59655	NA	0.299406	NA	0.441156
ccle_broad_2019	NCIH146_LUNG	0.358177	0.797351	0.151597	NA	NA	NA	0.642912	0.000409714	NA	0.0946999	0.201733	NA	1.92352	NA	0.314078	NA	-0.600367	2.07054	NA	NA	NA	-0.831369	0.231254	-0.56071	-0.898183	0.628006	NA	0.972935	0.356762	-0.550606	2.73731	NA	0.41179	0.315841	0.338538	1.42082	NA	1.05665	1.24826	NA	NA	-0.890036	1.88568	-0.979716	NA	1.25958	NA	0.419976
ccle_broad_2019	NCIH2172_LUNG	0.361827	1.15219	0.222722	NA	NA	NA	NA	0.613601	1.07073	-0.544365	-0.424758	NA	0.919344	-0.338128	NA	-0.248422	-0.59744	NA	NA	NA	NA	-0.414701	-0.23107	-3.09097	-0.191972	NA	NA	-1.52839	-0.960991	2.50558	-1.38517	0.192705	-0.747834	0.598648	-1.29961	-0.927838	NA	-0.260951	0.84977	NA	NA	-0.37446	0.00392667	-0.180333	NA	2.53459	NA	0.431609
ccle_broad_2019	COLO679_SKIN	0.365836	NA	NA	NA	NA	NA	NA	NA	NA	1.06459	-1.17592	NA	NA	NA	0.227397	NA	-2.47138	NA	NA	NA	NA	0.304621	0.879409	0.478112	-0.547839	NA	NA	0.73599	1.62	0.287311	-0.366264	NA	NA	NA	0.903499	NA	1.95012	0.0504993	NA	NA	NA	-0.743829	1.1494	NA	NA	0.61829	NA	0.738985
ccle_broad_2019	JM1_HAEMATOPOIETIC_AND_LYMPHOID_TISSUE	0.376773	2.23166	2.16996	2.6356	NA	NA	2.18505	-1.20896	0.156913	-3.26165	0.706043	NA	0.0898415	NA	-0.970009	NA	NA	NA	NA	NA	NA	NA	1.28668	-2.1893	1.36009	1.42497	NA	0.832879	-3.66206	2.16238	NA	0.180644	-0.427576	1.58286	0.544981	-0.231126	NA	NA	NA	NA	NA	-1.32013	-1.51892	-4.58597	NA	-0.200867	NA	-0.180873
ccle_broad_2019	NCIH2009_LUNG	0.377708	-0.972731	-0.0234123	NA	NA	NA	-2.30389	1.82422	0.0976938	-1.60808	1.74057	NA	0.0599877	2.58412	-3.21118	NA	-0.0196341	NA	NA	NA	NA	-0.342858	-1.41956	-0.255087	-1.38955	-0.551471	NA	-1.89863	-0.116078	1.45366	-1.12963	-2.31907	-0.376708	NA	1.03107	NA	NA	-0.616764	NA	NA	NA	0.461182	1.76416	0.0509931	NA	0.973149	1.0679	0.0849391
ccle_broad_2019	SNGM_ENDOMETRIUM	0.380954	-0.322781	0.731001	NA	NA	NA	NA	NA	NA	-0.328988	-0.210933	NA	-0.486797	-0.722302	-0.0262498	NA	0.385124	NA	NA	NA	NA	-0.0437482	0.146192	-0.708003	-0.666452	0.246404	NA	0.219237	0.116981	1.71545	NA	-0.592813	NA	NA	-0.779629	NA	NA	NA	NA	NA	NA	-0.290993	-0.22516	NA	NA	0.60473	-1.30703	-0.582004
ccle_broad_2019	NCIH716_LARGE_INTESTINE	0.385728	0.244033	0.353534	-0.436426	NA	NA	2.07813	0.0327431	-0.436442	-0.473139	-3.04019	NA	0.375282	-1.12825	-1.71365	-1.68464	-0.145663	NA	-0.265805	NA	NA	-1.26289	-0.292366	2.39351	1.71858	0.880336	NA	0.0783943	-0.914678	0.109185	NA	0.358027	NA	NA	-0.348254	NA	NA	-1.39117	NA	NA	NA	-1.61594	-1.81724	-1.49253	NA	0.260847	-0.749063	-0.623501
ccle_broad_2019	SW1573_LUNG	0.386971	-0.416506	-0.547216	NA	NA	NA	-1.35043	NA	NA	0.20985	-0.591581	NA	0.359549	NA	1.78479	-0.154424	-0.0933488	NA	NA	NA	NA	0.360656	1.7781	-0.378019	-0.397079	0.00561344	NA	-0.952628	1.01231	0.152871	-0.616435	2.49045	-0.125631	1.38511	-0.0130839	NA	0.698308	0.369698	NA	NA	NA	0.480895	1.14625	0.815019	NA	0.996551	0.873526	-0.113652
ccle_broad_2019	UACC257_SKIN	0.38868	1.15153	NA	NA	NA	NA	0.922961	0.0947451	NA	0.186615	-0.296969	NA	-1.93605	NA	0.0907521	NA	NA	NA	NA	NA	NA	0.0810904	0.223178	-0.837115	-0.212287	NA	NA	0.836085	1.80648	0.371396	-1.57004	-0.715082	NA	-1.6489	-0.475205	NA	NA	NA	NA	NA	NA	-0.463832	-0.190488	0.0622925	NA	-0.183638	-0.416774	-0.491773
ccle_broad_2019	JEKO1_HAEMATOPOIETIC_AND_LYMPHOID_TISSUE	0.39023	1.77804	NA	NA	NA	NA	NA	-0.720996	-1.24546	-0.357927	-0.0347865	NA	0.274406	NA	NA	NA	NA	NA	NA	NA	NA	1.8446	0.417014	-1.79875	0.34726	2.30198	NA	1.20962	-1.11976	1.77923	NA	0.456316	NA	NA	NA	NA	NA	NA	-0.0514702	NA	NA	-1.32603	-1.80861	NA	NA	-1.03457	NA	0.182617
ccle_broad_2019	SKMEL3_SKIN	0.418091	-0.0823559	NA	NA	NA	NA	0.17333	0.834399	-0.659612	-1.15119	-0.238008	-0.652754	-0.181542	NA	-0.932754	NA	-2.14005	-0.160651	NA	NA	2.80497	NA	-1.61897	-0.258439	0.131871	0.40567	NA	-0.260464	1.23738	0.999693	-0.190253	-1.01126	NA	0.420871	NA	NA	0.32462	0.0317751	NA	NA	NA	-0.292776	0.903787	0.754559	NA	0.0239999	-1.71538	0.468596
ccle_broad_2019	A2058_SKIN	0.418812	0.358665	NA	NA	NA	NA	-0.132532	-0.0411343	0.0277443	0.123115	0.122095	NA	-0.153572	0.141509	0.302097	0.226863	NA	NA	NA	NA	NA	NA	0.82475	-0.0787006	0.0533967	NA	NA	0.332624	0.494485	-0.3702	NA	-0.2064	NA	NA	0.743769	NA	NA	-0.129896	NA	NA	NA	-0.103715	0.709634	-0.229419	NA	-0.405736	NA	NA
ccle_broad_2019	LU65_LUNG	0.419988	-2.02622	0.133331	NA	NA	NA	-0.165973	-1.22217	NA	-0.286128	1.01589	NA	-1.65499	0.395579	1.08725	0.552792	-0.243817	NA	NA	NA	NA	-1.26444	-0.10773	0.146715	0.169256	0.0813075	NA	1.45944	-0.658851	-0.0672546	0.222745	-0.288532	-1.50704	-0.16595	-0.668062	NA	NA	-0.767859	NA	NA	NA	-1.63574	-0.853823	-0.677578	NA	-1.12195	0.275234	-0.202851
ccle_broad_2019	HUPT3_PANCREAS	0.428726	-0.262206	-0.427263	NA	NA	NA	0.0599495	-0.0598116	1.17211	-0.480858	-1.23603	NA	0.506184	NA	-0.100358	-1.05694	-0.132128	NA	NA	NA	NA	0.134092	-0.543387	0.264626	-0.925848	0.111048	NA	0.0611536	0.434641	-0.460879	-1.13166	-0.411637	0.410633	NA	-0.408138	NA	-1.01469	0.394794	NA	NA	NA	0.188024	-0.199939	0.702116	NA	-0.0958025	NA	-0.0232939
ccle_broad_2019	GAMG_CENTRAL_NERVOUS_SYSTEM	0.431782	-0.686104	-0.329309	NA	NA	NA	NA	NA	NA	0.392244	-2.36185	NA	0.109419	-0.640952	-0.798978	NA	0.655765	NA	NA	NA	NA	-0.746397	1.2667	0.587906	1.52482	-0.766999	NA	0.780426	2.1335	-2.60834	NA	-0.0426318	NA	NA	1.5622	NA	NA	NA	NA	NA	NA	-0.414304	0.926255	NA	NA	-0.461343	0.310859	-0.421156
ccle_broad_2019	A549_LUNG	0.432386	-0.849248	0.882029	NA	NA	NA	-0.929485	-1.8031	0.158574	0.591768	1.49007	NA	0.239865	1.43417	NA	0.83603	0.4016	-0.0404854	NA	NA	NA	0.0768532	0.401782	0.431064	-0.0168921	-0.320127	NA	0.405414	0.958503	0.0764543	-1.07054	-0.0206736	0.863448	NA	0.679483	NA	0.427299	0.578364	2.1716	NA	NA	-0.274817	0.833764	0.776509	NA	-0.361719	-0.303144	0.875622
ccle_broad_2019	CORL105_LUNG	0.432943	-2.23643	NA	NA	NA	NA	0.766061	0.348545	0.263605	1.1163	-0.938823	NA	-0.335294	-0.378547	NA	-2.02814	0.549578	NA	NA	NA	NA	-0.213536	0.743014	0.812965	1.50969	-0.681532	NA	1.18275	0.947329	-1.03903	-1.81394	1.922	-0.337923	NA	0.737875	NA	NA	-0.36026	0.745505	NA	NA	-0.222643	1.68735	-0.802067	NA	-0.56669	-0.443926	-0.02711
ccle_broad_2019	TE6_OESOPHAGUS	0.443795	0.550263	-0.45424	NA	NA	NA	-0.146103	1.98994	NA	-0.432392	1.2556	-4.62184	NA	NA	NA	0.19935	0.151279	NA	NA	NA	NA	0.377319	-1.29346	1.31544	0.342405	NA	NA	0.37716	0.2934	1.40296	2.48252	0.793847	NA	NA	2.47576	NA	NA	0.447022	NA	NA	NA	-0.294544	0.185698	-0.0331351	NA	0.378724	NA	-0.273696
ccle_broad_2019	DMS273_LUNG	0.461384	1.27537	1.91288	NA	NA	NA	0.331593	0.949915	NA	-0.262848	0.269354	NA	1.90459	NA	0.77437	NA	-1.18374	NA	NA	NA	-0.00761267	NA	-0.528359	0.122436	0.714487	1.50607	NA	1.13693	-0.146118	1.62549	0.543519	0.583074	-0.940315	NA	1.17042	NA	1.20871	0.690984	NA	NA	NA	-1.17791	2.31231	0.367545	NA	0.333674	1.13131	-1.72555
ccle_broad_2019	IGR39_SKIN	0.461658	NA	1.45676	NA	NA	NA	0.592548	NA	NA	0.350695	0.0172223	NA	0.0432751	NA	NA	0.533165	0.795185	NA	NA	NA	NA	-0.15257	0.969909	0.269909	1.98086	-0.410886	NA	0.421829	0.261952	1.30828	1.21984	1.04656	NA	NA	1.45401	NA	NA	0.77675	NA	NA	NA	0.37079	1.23716	1.00982	NA	-0.164683	NA	0.295329
ccle_broad_2019	SH4_SKIN	0.470065	1.85763	0.0683846	NA	NA	NA	2.48507	0.514997	NA	0.687809	0.0824284	NA	NA	NA	-0.154869	NA	-1.53598	NA	NA	NA	-0.296209	NA	0.125595	-0.462945	0.524456	-0.205312	NA	0.187432	0.503383	-0.373691	-1.43231	0.344388	0.791219	-0.51178	-0.779264	NA	-0.933404	NA	NA	NA	NA	-0.609109	-0.662232	0.123938	NA	-0.899253	NA	0.0862113
ccle_broad_2019	LS411N_LARGE_INTESTINE	0.486042	0.641847	-1.01616	NA	NA	NA	-0.527638	-0.570459	3.13237	-0.0458461	0.699558	NA	0.477511	-0.231546	NA	NA	0.501826	0.833346	NA	NA	NA	-0.398125	-0.317229	-0.100108	0.25668	0.444842	NA	1.08544	-0.261766	-0.343762	-0.157013	0.14388	NA	NA	0.295553	NA	NA	-0.0426415	NA	NA	NA	-0.0103144	-0.539304	0.0763447	NA	0.943577	0.313233	-0.910976
ccle_broad_2019	RH30_SOFT_TISSUE	0.493548	0.953707	-0.240122	-0.118927	NA	NA	-0.058132	1.27854	1.43747	-0.34878	-0.74341	NA	0.307981	NA	0.114585	-1.6995	-0.610211	NA	NA	NA	NA	-0.658244	0.495058	-0.73723	-0.122267	0.346813	NA	-0.162428	2.25914	-0.472517	0.0970197	0.586309	NA	-0.224332	0.951926	NA	NA	NA	0.103723	NA	NA	-0.393469	2.41477	1.25504	NA	0.0563494	-0.914512	-0.941111
ccle_broad_2019	NCIH661_LUNG	0.493734	0.778773	1.28619	NA	NA	NA	0.378344	-0.284216	NA	0.688866	-1.24538	-0.59974	NA	NA	NA	1.08449	-0.217272	NA	NA	NA	NA	-0.448682	0.728853	-2.33696	-1.06242	NA	NA	1.38077	-0.465831	-0.574737	0.904859	-0.312108	NA	NA	-1.17579	NA	NA	0.153815	NA	NA	NA	-0.352633	0.137949	-1.45269	NA	-0.973272	NA	-0.970303
ccle_broad_2019	HCC1500_BREAST	0.500015	0.698077	-0.963805	NA	NA	NA	0.0163186	-0.743708	-1.30498	1.35157	-0.841583	NA	-0.830022	-1.11668	NA	0.202412	-1.22367	0.37649	NA	NA	NA	-0.967118	1.51865	0.456129	-0.845214	0.268942	NA	1.83096	1.42011	-0.89276	-0.0431105	0.856961	-0.245749	NA	0.909804	NA	0.339753	0.647013	-1.27677	NA	NA	-0.256165	1.91797	0.678405	NA	0.343728	3.33832	-0.951141
ccle_broad_2019	SKNAS_AUTONOMIC_GANGLIA	0.503102	-0.15449	-0.136953	1.25919	NA	NA	-0.0357653	-0.598706	0.0856273	0.401097	-0.776284	NA	-0.201695	NA	0.682196	NA	NA	NA	NA	NA	NA	NA	-0.239749	0.35081	0.738827	0.298046	NA	1.3847	1.23303	0.281309	NA	0.241314	0.464935	1.02975	1.06034	1.25039	NA	NA	NA	NA	NA	0.261185	1.27284	-1.73033	NA	0.374505	NA	-0.794189
ccle_broad_2019	NALM6_HAEMATOPOIETIC_AND_LYMPHOID_TISSUE	0.519731	1.18932	-0.06501	NA	NA	NA	0.0429053	-2.00298	NA	-1.06038	2.18647	NA	1.74446	NA	-0.125024	NA	-1.83235	NA	NA	NA	NA	1.53755	1.36483	0.517802	2.00912	2.82626	NA	1.19742	1.16904	0.956641	NA	1.25064	NA	1.37444	0.0772426	NA	NA	-3.12452	NA	NA	NA	-0.174134	-1.63498	-1.32998	NA	-0.570035	-0.991551	-2.66156
ccle_broad_2019	TF1_HAEMATOPOIETIC_AND_LYMPHOID_TISSUE	0.530949	0.486442	1.63139	NA	NA	NA	NA	-0.197765	1.25345	1.30748	-1.17407	NA	-0.350014	NA	-0.462378	NA	-0.336698	NA	NA	NA	NA	-0.144048	0.64008	0.351552	1.17778	1.38785	NA	1.33983	-0.996628	0.360889	NA	1.05915	NA	NA	-0.669083	NA	NA	NA	0.599153	NA	NA	-0.343537	0.31953	NA	NA	0.94827	NA	-0.282161
ccle_broad_2019	IGR37_SKIN	0.534159	0.0741005	0.548973	NA	NA	NA	0.110206	0.245817	NA	-0.543845	-0.234712	NA	NA	NA	-0.000618507	NA	-1.09979	NA	NA	NA	-0.221445	NA	-1.02948	-0.448744	0.124803	0.333793	NA	-0.534985	0.906861	0.845511	0.448903	-0.184401	-0.179856	-0.445139	-0.410702	NA	0.484192	NA	NA	NA	NA	-0.509767	0.00697131	0.239197	NA	-0.0983611	NA	-0.00257478
ccle_broad_2019	CCK81_LARGE_INTESTINE	0.54824	0.392618	NA	NA	NA	NA	NA	-1.10092	0.393991	-1.29665	0.70504	NA	0.56354	NA	NA	NA	NA	NA	NA	NA	NA	-1.54734	-0.316149	0.788791	0.38462	0.229812	NA	1.28242	-1.09547	-0.580787	NA	1.40231	NA	NA	NA	NA	NA	NA	-0.217597	NA	NA	-0.725824	-0.169123	NA	NA	-0.533934	NA	-0.705037
ccle_broad_2019	SKCO1_LARGE_INTESTINE	0.562636	-2.67323	-0.754066	0.066684	NA	NA	-0.790358	NA	NA	-0.401885	0.055629	NA	-0.28418	0.329458	-0.376181	NA	0.325308	1.19538	NA	NA	NA	0.925526	-0.48216	0.0674235	0.0505786	-2.40067	NA	-0.892179	-0.170276	-1.43308	0.394401	-0.38004	-0.858937	-1.00556	-0.173612	-0.252013	-0.221436	NA	NA	NA	NA	-0.551444	0.382567	0.426805	NA	-0.987326	NA	0.927322
ccle_broad_2019	SJSA1_BONE	0.572048	0.800786	-0.234887	-0.818003	NA	NA	-0.259362	-0.708031	1.28904	-1.1579	-1.33157	NA	-0.228159	NA	-0.388077	0.540594	-1.09516	NA	NA	NA	NA	1.61491	-0.592067	0.746869	0.939074	-0.832594	NA	-0.135434	0.687573	-0.91824	0.0664882	0.635744	NA	-0.688846	-0.125057	NA	NA	NA	-1.07296	NA	NA	0.362445	1.12334	-0.108721	NA	-1.63772	-1.32599	1.08831
ccle_broad_2019	HT29_LARGE_INTESTINE	0.581274	0.0118353	NA	NA	NA	NA	-0.118276	-0.0630845	0.0543728	0.477847	-0.779461	1.07446	-0.110475	NA	-0.196685	NA	0.932806	0.566881	NA	NA	-0.0720106	NA	0.0297385	-0.110902	-0.459521	-0.129636	NA	0.152898	-0.422885	-0.138199	-0.250914	0.16114	NA	0.191371	NA	NA	-0.274423	0.0560439	NA	NA	NA	-0.440814	0.0708405	-0.505155	NA	-0.321781	0.0476071	-0.106299
ccle_broad_2019	A498_KIDNEY	0.59147	0.331007	0.0379387	NA	NA	NA	0.613488	-0.656196	NA	0.642204	-0.922324	0.180263	-1.05571	0.981661	-0.472393	NA	-0.614998	NA	NA	NA	-0.339973	NA	0.369714	1.25982	0.373986	-0.54344	NA	-0.406255	0.150795	-0.0134498	-0.807494	0.726285	-0.531524	NA	-0.517614	-0.845223	-1.80125	-0.438276	NA	NA	NA	1.20915	-0.401342	0.205728	NA	0.868435	NA	-0.663711
ccle_broad_2019	SKMEL28_SKIN	0.592919	-0.233014	0.885222	NA	NA	NA	0.0174351	2.03105	NA	-0.551207	0.579162	NA	-0.220451	NA	-1.9457	NA	-0.685984	NA	NA	NA	1.81536	NA	-1.12037	-1.02642	-0.370911	-0.716754	NA	-0.874458	0.478424	0.156115	-0.193093	0.345121	0.28089	NA	0.70091	NA	1.20037	-0.195052	NA	NA	NA	-0.757949	0.464787	0.897272	NA	0.286918	0.559348	0.884036
ccle_broad_2019	MDAMB157_BREAST	0.606071	NA	2.21169	NA	NA	NA	0.635243	NA	NA	-0.0852917	-0.700364	NA	-0.692459	NA	NA	0.91313	-0.0435639	NA	NA	NA	NA	0.249543	0.399781	0.703279	0.525172	0.0326957	NA	0.732299	0.107637	0.164456	0.588478	0.336397	NA	NA	0.139353	NA	NA	0.37407	NA	NA	NA	0.153866	1.44449	0.86947	NA	-1.43229	NA	-0.300549
ccle_broad_2019	SEM_HAEMATOPOIETIC_AND_LYMPHOID_TISSUE	0.622825	2.50923	-0.624791	0.566744	NA	NA	0.134495	NA	-1.35049	-0.600248	1.33773	NA	2.30861	1.20799	0.424193	0.348998	-0.106839	NA	NA	NA	NA	1.72541	-0.479103	0.413493	0.713648	2.94886	NA	1.1779	-1.30191	0.50591	1.17272	1.05649	1.62378	0.724554	0.945694	-0.63556	0.633435	0.280035	1.21337	NA	NA	1.12473	-0.774679	-1.10486	NA	1.1573	NA	-1.09926
ccle_broad_2019	MFE296_ENDOMETRIUM	0.632296	1.11779	0.851226	0.565849	NA	NA	-1.55666	0.806788	0.379352	0.747366	-0.213566	NA	0.308854	0.604562	0.481778	1.14021	-0.549041	NA	1.55469	NA	NA	-0.615826	0.493017	-0.881161	0.106056	0.184586	NA	1.02227	0.429135	0.798162	NA	-0.105885	NA	NA	2.98286	NA	NA	-0.404374	NA	NA	NA	-1.53571	1.40179	1.09242	NA	0.502375	0.0533718	-0.0152967
ccle_broad_2019	CORL88_LUNG	0.667592	1.75105	0.577176	NA	NA	NA	NA	-0.341407	0.024668	0.619488	-0.0945767	NA	1.25036	0.133574	NA	-9.42044	0.123182	NA	NA	NA	NA	-1.40559	0.726894	0.770767	0.162143	NA	NA	1.61593	1.27703	-1.39584	1.83509	1.15155	-0.352336	0.426838	2.34106	0.132974	NA	-0.509487	-0.571232	NA	NA	-1.46437	1.95296	-1.42854	NA	-0.174088	NA	1.5171
ccle_broad_2019	HT55_LARGE_INTESTINE	0.676371	0.0101144	-2.48206	NA	NA	NA	-0.41002	0.757944	NA	-0.232351	-0.165569	NA	-0.566868	NA	-0.736968	NA	0.920564	NA	NA	NA	-0.260705	NA	-1.11482	0.108291	-0.0235807	-0.0308386	NA	1.36756	0.148398	0.754254	-0.736572	-0.00175142	-1.45188	NA	0.678111	NA	-1.45248	-0.232245	NA	NA	NA	1.85357	-0.307267	0.353084	NA	-0.417363	1.0099	-1.02452
ccle_broad_2019	MOLM16_HAEMATOPOIETIC_AND_LYMPHOID_TISSUE	0.681129	0.493015	1.43242	NA	NA	NA	NA	0.499323	0.157104	0.27551	0.100079	NA	0.961221	NA	-1.38076	NA	-0.461999	NA	NA	NA	NA	-0.861284	0.952371	-0.80187	0.736791	1.72148	NA	2.83476	0.175643	1.82211	NA	-0.157853	NA	NA	1.06432	NA	NA	NA	0.70598	NA	NA	-2.25411	0.871027	NA	NA	1.79987	NA	-0.458303
ccle_broad_2019	VMRCRCW_KIDNEY	0.726963	-2.94428	-0.367093	NA	NA	NA	-0.749739	-0.0649054	NA	0.115015	-0.342016	NA	NA	NA	-0.551466	NA	1.26701	NA	NA	NA	0.266469	NA	0.371861	0.634602	-0.777242	0.0534939	NA	0.0452443	-0.552545	-0.361444	-0.21289	0.327677	0.160455	0.646967	0.658203	NA	0.255816	NA	NA	NA	NA	0.456045	-0.0424853	-0.385035	NA	-0.122196	NA	-0.0928157
ccle_broad_2019	KASUMI1_HAEMATOPOIETIC_AND_LYMPHOID_TISSUE	0.736119	0.323549	0.799494	NA	NA	NA	0.476582	-0.517881	NA	0.195143	0.974384	0.254424	0.152292	0.847874	1.07959	0.640495	-1.03588	NA	NA	NA	NA	-1.57062	-0.443367	-0.471136	-1.72289	0.80753	NA	1.04889	-0.196217	-0.902435	0.533517	2.2153	1.22841	NA	0.189744	NA	-0.214918	-2.38846	NA	NA	NA	-2.01265	2.68715	0.520823	NA	0.447335	-0.542891	-1.17015
ccle_broad_2019	TE4_OESOPHAGUS	0.762997	0.401433	-1.43993	NA	NA	NA	-0.510465	NA	NA	0.0643739	0.256547	NA	-0.722734	NA	0.221747	-0.0222807	1.13175	NA	NA	NA	NA	-1.25954	-2.33413	-0.180636	-0.245296	-0.493471	NA	-1.51012	1.19888	0.899857	-0.307071	-1.19371	-0.60518	0.0976774	-1.28496	NA	-0.756792	-0.741643	NA	NA	NA	-1.00469	-0.291011	0.253248	NA	0.104431	-1.07291	1.71961
ccle_broad_2019	OPM2_HAEMATOPOIETIC_AND_LYMPHOID_TISSUE	0.763573	2.9113	-1.92997	-0.365255	NA	NA	0.865246	NA	NA	-0.413102	-0.203488	NA	0.929097	-0.00183561	0.805649	NA	-0.208589	-1.34909	NA	NA	NA	-1.47171	-0.014795	1.1157	-0.086672	-0.479416	NA	-0.379189	-1.12598	0.454095	-0.376178	2.95136	1.2843	0.929541	2.52474	-0.863609	-0.582063	NA	NA	NA	NA	-1.74285	1.24596	-2.51821	NA	0.475472	NA	-0.794792
ccle_broad_2019	NCIH1975_LUNG	0.769469	0.589578	NA	NA	NA	NA	-0.215617	1.65262	-0.371071	2.17781	-0.537243	NA	-0.83175	-0.311565	NA	1.33145	1.0992	NA	NA	NA	NA	-1.1807	-0.216753	0.191543	1.00311	-0.526961	NA	1.68306	0.072322	-0.770674	-0.0200708	0.42205	-0.398434	NA	-0.281737	NA	NA	-0.449422	-0.552925	NA	NA	-0.433979	1.32245	-0.307604	NA	2.15887	1.2034	-0.0514056
ccle_broad_2019	NCIH196_LUNG	0.773514	1.25653	1.0634	NA	NA	NA	0.736983	-1.26375	-0.680774	-1.4858	0.0885538	NA	1.51752	-0.758452	0.674147	NA	-0.062491	NA	NA	NA	NA	3.26736	-1.05375	0.401862	0.254872	-0.872933	NA	-0.376041	-0.242551	-1.5036	0.427204	0.0895894	-0.487764	NA	-0.17288	NA	NA	0.704947	NA	NA	NA	-0.915361	-0.0902804	-0.808413	NA	-0.812048	-1.76842	0.996135
ccle_broad_2019	SHP77_LUNG	0.77584	-0.377336	-1.4311	0.0772982	NA	NA	0.376407	NA	-1.14565	-0.217393	-0.216277	NA	-0.940623	0.273715	0.20307	-0.100035	-0.651176	NA	NA	NA	NA	-0.0646081	0.286731	0.724466	-0.130671	-1.26943	NA	-1.04209	0.215479	-1.63609	0.559679	1.03181	-0.856979	0.461087	0.24663	2.05985	-1.31922	-0.194363	-0.789888	NA	NA	0.227868	-0.706722	0.106147	NA	-1.39051	NA	-0.256873
ccle_broad_2019	HS944T_SKIN	0.785556	0.246091	0.877968	NA	NA	NA	-0.0322043	-0.540873	NA	1.03217	-0.120043	0.492066	-0.925555	-0.573136	-0.738927	NA	-0.935762	NA	NA	NA	0.141648	NA	-0.115897	-0.0550635	0.682184	0.0204988	NA	0.0444245	1.0435	-1.16953	-0.995699	-0.571482	-0.32897	NA	0.265804	-0.0414662	-0.585026	-1.11863	NA	NA	NA	-0.206166	-0.277365	-1.87375	NA	-1.04672	NA	-0.0523697
ccle_broad_2019	RD_SOFT_TISSUE	0.78897	0.443355	1.23168	-0.866587	NA	NA	0.501933	NA	-0.255456	-0.350679	-1.3337	NA	-1.0957	0.21431	0.394041	-0.14861	0.313778	NA	NA	NA	NA	-0.373078	-1.3015	-0.523364	-1.43562	-1.42725	NA	-0.937424	1.84318	-0.611989	-0.759676	-0.482386	-0.480077	-0.874709	-0.632189	0.713883	0.317958	-0.000244523	-1.16737	NA	NA	0.105027	2.20985	0.234993	NA	-0.161132	NA	1.02772
ccle_broad_2019	HCC70_BREAST	0.797081	0.868516	NA	NA	NA	NA	1.6405	2.12134	-0.0578227	0.749775	2.04338	NA	-0.153695	-0.359145	NA	0.172058	-0.449956	NA	NA	NA	NA	-0.220312	0.149055	0.581611	0.647113	0.0299774	NA	-0.036292	-0.205191	0.71462	0.0909707	-0.422642	-0.144032	NA	-0.261291	NA	NA	1.30028	0.380045	NA	NA	-0.117342	-0.106231	-1.02653	NA	0.853985	1.87903	-0.472375
ccle_broad_2019	NCIH1792_LUNG	0.801157	-1.28015	-0.0109586	NA	NA	NA	-0.343003	-0.356189	-0.188839	-0.720565	0.346371	NA	2.70227	-0.478421	-1.65343	NA	1.43273	NA	-1.90386	NA	NA	-0.661579	-0.669706	0.0630662	0.178852	0.450804	NA	-0.797735	0.881778	-0.409012	0.124189	-1.21019	0.393109	-0.064509	1.7795	NA	NA	1.40207	NA	NA	NA	-0.453949	-0.468697	0.41018	NA	0.331985	-0.474736	0.220809
ccle_broad_2019	HCC15_LUNG	0.801767	0.0808673	0.278411	NA	NA	NA	-1.83764	-0.402405	NA	0.458838	-1.23237	0.419097	-1.28588	-0.367505	-1.58387	0.245999	0.204682	NA	NA	NA	NA	0.125283	1.46509	0.464691	-0.810175	-2.91958	NA	-0.681198	-0.76768	-0.0613218	-1.279	-0.35287	-0.330347	NA	-0.976704	NA	0.837135	1.62312	NA	NA	NA	0.403951	0.741279	-0.0960421	NA	-1.6818	-0.149303	-0.274848
ccle_broad_2019	MKN45_STOMACH	0.803443	0.282042	-0.623463	NA	NA	NA	-0.906448	0.607689	NA	-0.531582	0.72176	1.62832	NA	NA	NA	0.000239445	0.652889	NA	NA	NA	NA	-0.421023	-0.753249	2.20522	0.5023	NA	NA	-0.195922	-1.73898	1.17814	0.510028	0.172841	NA	NA	0.779657	NA	NA	-0.412755	NA	NA	NA	-0.754999	-0.255743	0.850186	NA	0.76408	NA	-1.1907
ccle_broad_2019	IGROV1_OVARY	0.812005	-0.075314	0.784278	NA	NA	NA	-0.414312	1.37239	-0.250619	-1.84331	0.777541	NA	0.123775	0.235118	-0.640381	NA	-1.6045	NA	NA	NA	NA	-0.224225	-1.15392	-1.57365	-0.682511	-0.0173617	NA	-0.987093	-0.398166	1.04088	1.62952	-0.840151	0.441659	NA	-0.0042811	NA	NA	1.45377	NA	NA	NA	-0.991942	-0.988985	-0.155851	NA	0.793041	-1.52966	0.264197
ccle_broad_2019	HCC2218_BREAST	0.824727	0.696621	-1.08796	NA	NA	NA	NA	-0.430744	-2.22384	1.58811	-0.829735	NA	-2.52366	-0.354818	NA	1.97506	-2.27474	NA	NA	NA	NA	-0.341413	0.0188998	0.0804082	-0.573965	NA	NA	-0.184684	-0.285428	-1.49839	-2.70176	0.46618	0.0436428	-0.387784	-3.11946	0.534028	NA	-0.701683	-0.8695	NA	NA	0.779045	-0.172102	-0.803075	NA	-1.75141	NA	-2.98597
ccle_broad_2019	HCC1395_BREAST	0.837384	0.645713	-0.799566	NA	NA	NA	1.65848	NA	0.341843	-0.918844	0.719135	NA	0.614395	1.58298	-0.216357	-0.113883	-0.468034	NA	0.499686	NA	NA	-0.0575504	0.878781	0.524169	1.60121	1.05568	NA	-0.282718	-0.305997	-0.750246	-0.0187362	0.0704881	0.8891	1.03157	-0.151032	NA	NA	-0.223465	0.642805	NA	NA	1.51592	0.674295	-0.589426	NA	-1.47792	NA	0.46524
ccle_broad_2019	SW948_LARGE_INTESTINE	0.853031	0.295488	0.38964	NA	NA	NA	0.194627	-0.536424	NA	1.06346	-0.669673	NA	-0.00811067	NA	-0.241629	NA	0.671327	0.875215	NA	NA	NA	-0.508901	-0.183059	0.116245	0.463068	-0.524344	NA	0.678796	1.22853	-0.54797	0.73325	NA	0.101208	-0.516106	0.134145	-0.0582357	NA	0.67133	-0.779186	NA	NA	0.360588	-0.124125	0.35967	NA	-0.408859	NA	1.2716
ccle_broad_2019	LN229_CENTRAL_NERVOUS_SYSTEM	0.856102	-1.056	-0.164673	NA	NA	NA	-1.11952	NA	NA	-0.0755222	-0.535083	NA	-0.837389	NA	-0.160513	0.0243672	0.426037	NA	NA	NA	NA	0.759655	-0.115547	1.03824	0.628472	-0.397678	NA	-0.353104	1.68438	-1.63837	-0.623273	-0.796432	0.315367	0.916549	1.1261	1.64149	NA	NA	-0.197781	NA	NA	0.646785	1.09529	0.932795	NA	-0.748913	0.605922	NA
ccle_broad_2019	SW1417_LARGE_INTESTINE	0.857249	-0.794816	-0.612424	NA	NA	NA	0.0300194	NA	0.130322	0.715288	0.37333	NA	0.956423	0.189038	0.267422	-0.0642536	-0.804878	NA	-0.0887778	NA	NA	-0.527055	-0.0465424	0.154877	-0.0029041	-0.721514	NA	0.898967	0.997995	0.770854	-0.262193	1.3005	-0.929533	-1.19928	0.314825	NA	NA	0.970008	-0.284822	NA	NA	-0.276817	0.126513	1.66936	NA	2.16617	NA	-0.0692178
ccle_broad_2019	TCCPAN2_PANCREAS	0.863275	-0.327878	-0.456163	NA	NA	NA	0.334788	-1.65628	-0.134674	-0.801902	0.0520533	NA	-0.17613	0.513291	NA	NA	0.526244	-0.47763	NA	NA	NA	-0.136027	-0.676044	0.190384	0.53761	0.397766	NA	0.24936	0.572771	-0.88786	-0.695229	1.29611	NA	NA	0.442679	NA	NA	1.9464	NA	NA	NA	0.761965	-1.18299	0.111471	NA	-0.532053	-0.201531	0.683158
ccle_broad_2019	HCT15_LARGE_INTESTINE	0.888238	1.03358	NA	NA	NA	NA	-1.14752	0.328737	0.928522	0.739285	-1.34908	NA	-0.600023	-1.03094	NA	NA	NA	NA	NA	NA	NA	-0.234148	-0.37222	0.0751205	-0.151819	1.20506	NA	-1.12742	-0.307322	2.4662	-0.749373	-0.0712831	NA	NA	-0.636264	NA	NA	-5.73412	NA	NA	NA	1.37487	-0.960318	0.270861	NA	0.114215	NA	-0.146083
ccle_broad_2019	WM1799_SKIN	0.914689	0.000400531	1.54832	NA	NA	NA	NA	-0.789403	NA	0.0402982	-0.462991	NA	-0.718154	0.113616	NA	0.247861	-0.392605	NA	NA	NA	0.825639	NA	0.656553	NA	1.25667	-0.129209	NA	0.657946	0.21399	-1.18399	-0.407236	-0.539908	0.417964	-0.118088	-0.709322	NA	NA	NA	NA	NA	NA	0.628414	-0.27449	-1.1374	NA	-1.13005	NA	0.250132
ccle_broad_2019	769P_KIDNEY	0.92288	-2.34276	-1.44451	0.475485	NA	NA	-1.81108	NA	0.172217	0.994289	0.23831	NA	-1.24574	0.300669	-1.01971	0.256761	0.675127	NA	NA	NA	NA	-0.176327	-0.308834	2.07833	1.87397	-0.468306	NA	-0.0192268	0.0745054	-0.480959	-1.50323	-0.0546199	0.597521	-1.02533	-0.820829	-0.337702	-1.30056	-1.58291	-0.894185	NA	NA	-0.803512	0.042919	-0.057093	NA	-0.524346	NA	0.643181
ccle_broad_2019	SKNMC_BONE	0.936618	0.824865	0.965501	-0.403609	NA	NA	-0.596218	0.717923	-0.476045	-0.226405	1.00731	NA	1.13198	-0.626211	-1.67419	-1.48286	-0.793623	NA	0.0348674	NA	NA	-1.02755	0.967752	-0.209099	0.194753	2.29847	NA	0.286069	-0.189512	0.499247	NA	2.77563	NA	NA	1.36237	NA	NA	0.704478	NA	NA	NA	-0.105267	0.302988	0.861336	NA	0.779463	0.715821	-0.801942
ccle_broad_2019	KYSE510_OESOPHAGUS	0.966994	0.818741	-0.476274	NA	NA	NA	0.740822	0.788537	NA	-0.264092	0.357323	NA	-0.511628	0.299681	0.274072	0.322195	0.958926	NA	NA	NA	NA	0.555734	1.27846	1.54612	0.254057	0.163308	NA	-0.224404	-0.345174	-0.233141	0.504164	1.5407	-2.60483	0.852261	0.919662	NA	NA	-0.790519	NA	NA	NA	1.16708	-0.0211259	-2.27821	NA	-0.979789	-0.172299	0.488178
ccle_broad_2019	KASUMI2_HAEMATOPOIETIC_AND_LYMPHOID_TISSUE	1.02942	1.58111	2.63611	1.16328	NA	NA	-0.625002	-0.353582	0.199113	1.07893	0.255518	NA	1.29521	NA	-0.781593	NA	NA	NA	NA	NA	NA	NA	-0.462628	0.982548	-0.0643292	1.94449	NA	1.75257	-0.234185	-0.981041	NA	0.566008	0.957331	1.76477	2.14951	-0.224727	NA	NA	NA	NA	NA	0.369312	0.350636	1.54833	NA	0.336751	NA	-1.00595
ccle_broad_2019	SUIT2_PANCREAS	1.03734	0.643174	-1.39297	-0.949098	NA	NA	-0.776854	NA	-0.682997	0.516192	0.00597777	NA	-1.39942	NA	-0.267966	NA	0.0207935	NA	NA	NA	0.965586	-0.806514	0.434702	-0.0324803	0.134379	-2.17708	NA	0.00279027	-0.881707	-1.26856	NA	0.0178884	0.237997	-0.992694	-0.170954	NA	NA	-0.845026	NA	NA	NA	-0.602066	-1.30356	0.274575	NA	-1.69518	-1.307	0.43655
ccle_broad_2019	WM88_SKIN	1.05257	-0.286091	0.615991	NA	NA	NA	-0.235668	0.311861	NA	0.781308	-1.11042	NA	-1.39832	NA	-0.528393	NA	-0.728803	NA	NA	NA	NA	0.86869	-0.431278	-0.629938	1.4242	0.23641	NA	-0.221154	0.776782	-0.646564	NA	0.132564	NA	0.100155	-0.752315	NA	NA	1.30675	NA	NA	NA	0.107768	1.04463	-0.373852	NA	-0.602017	0.207683	1.31098
ccle_broad_2019	SNUC2A_LARGE_INTESTINE	1.0758	0.0572861	0.0375509	NA	NA	NA	1.36392	-1.02626	NA	1.33811	-1.30357	0.292581	NA	NA	NA	0.848846	-0.850875	NA	NA	NA	NA	0.00604302	0.262513	2.02033	0.340554	NA	NA	-0.193902	0.779157	-1.27676	-1.72671	1.59763	NA	NA	-1.56036	NA	NA	0.770592	NA	NA	NA	0.339967	0.667373	-0.544277	NA	-0.553945	NA	-0.606694
ccle_broad_2019	SKES1_BONE	1.09474	0.641632	0.584982	NA	NA	NA	0.0640011	1.23487	NA	1.90743	1.00201	NA	0.950156	NA	0.987922	NA	-0.61841	NA	NA	NA	NA	-0.671557	0.708905	-0.0524661	-0.238793	1.72185	NA	2.33052	0.25454	0.927623	NA	0.0370312	NA	0.0492254	1.7772	NA	NA	-0.284887	NA	NA	NA	-2.66351	-0.299608	1.28217	NA	1.58951	0.613291	-1.60598
ccle_broad_2019	MEWO_SKIN	1.10549	0.745488	1.03751	NA	NA	NA	1.26253	0.669765	NA	0.495121	-0.386705	-0.0637662	0.161746	-1.63419	-0.0363133	NA	0.241786	NA	NA	NA	1.82003	NA	-0.710982	-0.5206	0.28745	0.374575	NA	-0.129525	0.871159	0.571587	0.36231	0.287362	0.639036	NA	0.654562	0.770922	0.56106	-0.5486	NA	NA	NA	0.167003	0.462768	1.065	NA	1.02051	NA	-1.00066
ccle_broad_2019	A2780_OVARY	1.11877	0.997076	-0.749963	NA	NA	NA	1.26077	0.332618	-0.392559	0.372292	0.9461	NA	-0.512966	0.036717	-0.124118	NA	-2.0603	NA	1.194	NA	NA	0.333821	1.38537	-0.620536	1.60566	1.28673	NA	0.902025	-0.0358994	0.871807	-0.881941	0.515819	0.123807	1.29425	0.0942738	NA	NA	-0.290011	NA	NA	NA	-0.30892	0.503193	0.140172	NA	0.875125	-0.277594	-0.835532
ccle_broad_2019	MDAMB453_BREAST	1.12379	-0.363288	0.307902	NA	NA	NA	-0.117031	-0.68855	-0.196078	1.58184	-1.26821	NA	-0.590278	-2.02232	1.34662	NA	0.473241	NA	NA	NA	NA	-1.82558	2.15392	1.39943	0.899954	-0.179341	NA	0.766271	-0.0890074	0.447461	0.765077	0.279266	0.203042	NA	-0.122461	NA	NA	-0.463314	NA	NA	NA	-1.32253	-2.9892	-0.256471	NA	0.765757	-1.87477	0.980785
ccle_broad_2019	MELJUSO_SKIN	1.12574	-0.0239627	0.916488	NA	NA	NA	1.1015	0.222201	-0.574669	-0.237859	-1.59008	NA	-0.516368	-0.8941	NA	NA	-0.846378	-1.71647	NA	NA	NA	-0.555781	0.808288	0.0516275	0.732692	-0.136625	NA	-0.364448	1.32932	-0.658609	0.231918	-0.667125	NA	NA	0.283288	NA	NA	-1.80061	NA	NA	NA	-0.0732126	0.516215	0.042972	NA	-0.654213	-0.00665087	-0.569512
ccle_broad_2019	SW620_LARGE_INTESTINE	1.12885	0.821191	NA	NA	NA	NA	0.28369	-0.0645092	-0.144376	0.0354586	-0.0793308	NA	-0.050526	0.516998	0.205824	-0.465715	NA	NA	NA	NA	NA	NA	0.0134566	-0.0631771	0.284204	NA	NA	-0.230172	-0.734564	0.168245	NA	-0.707467	NA	NA	0.615492	NA	NA	-0.259054	NA	NA	NA	-0.699458	0.842357	-0.440345	NA	0.088725	NA	NA
ccle_broad_2019	HUG1N_STOMACH	1.17973	0.130855	1.03352	NA	NA	NA	0.419433	0.372718	NA	0.193057	-2.52301	NA	0.0934431	0.118787	0.530813	0.690688	-0.572358	NA	NA	NA	NA	-0.814539	0.657133	1.42323	-0.0811975	-0.632737	NA	0.980113	-0.792376	-1.0653	-0.374499	4.02416	-3.09795	-1.02228	0.591033	NA	NA	-0.707063	NA	NA	NA	0.841646	2.17438	0.694746	NA	3.88202	-0.168864	0.318679
ccle_broad_2019	NCIH2122_LUNG	1.21269	-0.0543008	NA	NA	NA	NA	0.626792	-0.865569	-0.592049	1.21748	0.788797	NA	-0.469544	-0.891469	NA	NA	NA	NA	NA	NA	NA	-0.593594	0.539199	0.133243	1.64762	-0.367494	NA	1.2797	-0.185351	0.863939	-0.267177	0.202373	NA	NA	0.697057	NA	NA	-0.146423	NA	NA	NA	-0.861795	0.0732929	0.108166	NA	-0.763637	NA	0.082796
ccle_broad_2019	HCC1187_BREAST	1.22197	0.721991	1.15313	NA	NA	NA	0.0988998	-0.435365	NA	1.04141	0.851473	NA	-0.360902	NA	0.508034	NA	-0.328737	-0.867307	NA	NA	NA	1.90132	1.55312	1.22388	0.350122	-0.254456	NA	-0.0947118	-1.26366	1.66481	-2.16559	NA	0.0491161	2.0923	-0.0282882	0.222932	NA	0.452151	-1.10927	NA	NA	2.34996	0.950103	0.364125	NA	1.1292	NA	-0.525755
ccle_broad_2019	G402_SOFT_TISSUE	1.26663	-0.800789	1.41359	-0.428124	NA	NA	-1.42331	NA	NA	0.622311	-0.471065	NA	-0.251137	0.176082	0.72843	NA	0.251384	1.35995	NA	NA	NA	-1.62784	-0.881536	-1.17665	-0.474724	0.969657	NA	-0.580363	0.715597	0.739183	0.258162	-0.389328	-1.15981	-0.128877	-0.450067	-0.554536	0.511187	NA	NA	NA	NA	-0.429869	-0.0669506	0.112378	NA	1.00198	NA	-0.0382888
ccle_broad_2019	MKN1_STOMACH	1.28864	0.643937	-0.344997	NA	NA	NA	1.35268	-0.868994	-0.118655	2.04335	-2.11269	NA	-2.71316	-0.905821	-1.02884	NA	-1.91092	NA	-1.12842	NA	NA	-0.614904	1.13905	0.348838	1.47657	-1.01691	NA	0.861004	0.28563	-2.39573	-0.42697	0.352442	-1.0557	-1.65893	-1.54521	NA	NA	-1.29564	NA	NA	NA	-0.372946	0.187594	-0.219618	NA	-0.963574	0.154032	-0.0440746
ccle_broad_2019	IPC298_SKIN	1.31521	-0.183316	-0.125929	NA	NA	NA	NA	0.531608	NA	0.0723821	0.390941	NA	-0.437466	0.430796	NA	0.0537612	0.865778	NA	NA	NA	-0.429355	NA	0.18699	NA	-0.0739504	-0.0720209	NA	0.203073	-0.251627	-0.957264	-0.157784	-0.0494891	-0.688307	-0.355542	-0.663385	NA	NA	NA	NA	NA	NA	0.13604	-0.693236	-0.263141	NA	0.239163	NA	-1.93243
ccle_broad_2019	NCIH647_LUNG	1.3766	-0.532873	1.50436	-0.470406	NA	NA	1.24045	0.872707	-0.801163	0.799019	1.22452	NA	-0.583012	NA	-1.07331	0.297439	-1.01543	NA	NA	NA	NA	-0.789733	0.223406	0.128589	-0.52029	-0.48096	NA	-0.986539	0.866798	0.435662	0.0724315	-0.667632	NA	-0.564617	-1.07641	NA	NA	NA	0.0404041	NA	NA	-0.418314	0.631463	-0.725405	NA	-0.832163	-0.466879	0.0446032
ccle_broad_2019	CALU6_LUNG	1.38963	-0.653278	-0.744192	NA	NA	NA	0.325436	-0.297007	-0.347961	0.556169	-0.0338337	NA	0.408647	0.77865	-0.672863	-0.0948087	-0.263862	NA	NA	NA	NA	-0.249778	0.175543	0.500482	-0.308559	0.103334	NA	0.808829	0.458114	-0.730423	NA	0.987296	-0.630282	0.186763	0.390609	NA	NA	NA	NA	NA	NA	-1.84838	-0.0377653	0.904387	NA	1.15739	0.150046	0.0385221
ccle_broad_2019	RCHACV_HAEMATOPOIETIC_AND_LYMPHOID_TISSUE	1.40607	2.84926	0.305531	NA	NA	NA	NA	NA	NA	-1.26603	1.6651	NA	0.0827713	-0.229572	-1.84973	NA	-1.74487	NA	NA	NA	NA	0.324391	0.0660735	1.93167	1.06589	2.58713	NA	0.511996	-2.64693	1.02058	NA	1.50808	NA	NA	0.990103	NA	NA	NA	NA	NA	NA	1.36711	-2.47342	NA	NA	-1.05184	-2.6665	0.299164
ccle_broad_2019	UACC62_SKIN	1.48683	-1.50668	1.24536	NA	NA	NA	NA	0.447352	-0.938533	-0.235669	0.237302	NA	-0.426086	0.723126	NA	1.12755	-2.13588	NA	NA	NA	NA	-0.695512	-0.0356067	-0.917458	1.08398	NA	NA	0.503061	0.731415	-1.0778	0.945048	1.01598	0.925074	1.27291	1.429	1.77097	NA	-0.343079	0.475246	NA	NA	-0.185944	-0.102831	-0.113486	NA	0.941747	NA	1.32029
ccle_broad_2019	SKMEL5_SKIN	1.52022	-0.687	-0.259312	NA	NA	NA	NA	1.44572	NA	1.34216	-0.220091	NA	-1.03136	NA	0.948969	0.286986	-0.185509	NA	NA	NA	3.03899	-0.368463	0.172208	0.209512	0.566682	0.0354755	NA	1.27443	0.687689	0.245807	NA	0.207482	0.38404	NA	1.58907	0.379446	NA	2.25442	NA	NA	NA	-1.11491	-0.448267	0.167329	NA	-0.210754	0.150121	0.511552
ccle_broad_2019	NCIH2066_LUNG	1.54717	0.357367	1.55984	NA	NA	NA	-0.425099	-0.25554	-0.737958	-0.0706719	1.59327	NA	0.767627	0.875726	1.17469	NA	0.0417955	NA	2.1413	NA	NA	-0.546922	0.911635	0.193639	0.330653	0.757344	NA	0.0286578	1.22798	1.0612	0.204668	-0.205258	-0.471172	1.88757	0.404041	NA	NA	0.263929	NA	NA	NA	-0.0270677	1.45464	-0.00879066	NA	-1.66326	-0.425107	0.355427
ccle_broad_2019	NCIH929_HAEMATOPOIETIC_AND_LYMPHOID_TISSUE	1.54921	1.21058	-0.33289	NA	NA	NA	NA	NA	NA	1.49918	-0.147412	NA	-0.450314	1.26885	0.518603	NA	-1.46777	NA	NA	NA	NA	-0.054802	0.786268	0.983108	-0.347116	-0.568185	NA	0.941925	-0.136459	-1.924	NA	2.99684	NA	NA	1.68152	NA	NA	NA	NA	NA	NA	-0.442856	-0.00997792	NA	NA	-1.20908	2.1	-0.256182
ccle_broad_2019	MDAMB436_BREAST	1.62219	-0.745972	0.0256844	NA	NA	NA	-0.860186	-0.2949	-0.959212	0.906072	0.739873	NA	0.373427	-1.65645	NA	0.488042	-1.14594	-0.840215	NA	NA	NA	-0.630082	1.22714	-0.53114	0.444029	0.00911122	NA	-1.4525	1.74956	-1.02009	0.0790879	0.249242	0.460741	NA	0.0138871	NA	0.811318	0.687598	0.0462318	NA	NA	-2.19986	0.107225	0.162175	NA	0.36341	0.250139	-0.12645
ccle_broad_2019	NCIH1155_LUNG	1.62854	-1.82985	0.173461	-0.708956	NA	NA	0.645582	NA	NA	-0.172538	-1.217	NA	-0.692409	0.851214	-0.36628	NA	-0.937105	-1.6011	NA	NA	NA	-1.96946	0.226355	0.841572	0.151392	2.04602	NA	0.774649	-0.136164	-1.32846	1.41799	0.0999389	-0.369297	0.306742	1.68867	-0.03898	2.22474	NA	NA	NA	NA	-1.43759	0.132687	-1.20757	NA	0.431279	NA	-0.0467617
ccle_broad_2019	SKMEL30_SKIN	1.65356	1.27529	-0.893838	NA	NA	NA	-0.0101061	-0.141423	NA	0.340902	-0.733525	NA	-0.676327	-0.393885	-1.86614	0.00577892	-2.16756	NA	NA	NA	NA	0.260472	-0.171153	0.347463	0.657709	0.0624074	NA	-0.490496	0.830956	0.567821	-1.56785	-0.577454	3.70307	0.951569	-0.18853	NA	NA	0.47596	NA	NA	NA	-0.895764	-0.388384	0.73366	NA	-0.582359	-0.205419	-0.639748
ccle_broad_2019	MONOMAC6_HAEMATOPOIETIC_AND_LYMPHOID_TISSUE	1.70425	0.960704	2.23229	NA	NA	NA	-1.18598	-1.98807	-0.117149	0.869564	-0.0217592	NA	-0.399955	0.0296976	0.991825	0.458841	-0.378915	NA	NA	NA	NA	0.364642	-1.01647	-1.144	-0.751631	1.27208	NA	-0.649546	-0.275328	1.36413	NA	0.0401995	2.08587	-0.932508	-0.688211	NA	NA	NA	NA	NA	NA	-0.256289	-0.0750961	1.34602	NA	-0.787186	-1.51759	-1.69014
ccle_broad_2019	NCIH1944_LUNG	1.81797	-2.05024	-0.555659	NA	NA	NA	-0.528685	NA	-0.261321	-0.494942	-0.929795	NA	-0.847233	-7.2935	0.105087	-0.17266	0.340146	NA	-2.27204	NA	NA	0.766456	-0.716856	-0.662106	0.139586	-1.42054	NA	0.123639	-0.477644	-0.283895	-1.16632	-1.24362	0.67747	-0.0591252	0.975115	NA	NA	-0.668213	-0.346459	NA	NA	-1.09779	-1.2942	-0.897631	NA	0.226518	NA	0.187105
ccle_broad_2019	VCAP_PROSTATE	1.84099	0.991387	-0.532397	NA	NA	NA	NA	-2.50971	-1.01614	1.83247	-0.740995	NA	0.162087	-2.36739	NA	0.687584	1.86314	NA	NA	NA	NA	-1.03212	0.737009	3.47626	-0.414339	NA	NA	1.92074	1.61377	-0.836476	-0.0108483	-1.60423	-0.520019	-1.6122	2.24769	1.49234	NA	-0.172347	-1.64466	NA	NA	-0.537295	-0.744989	-0.0221491	NA	0.71001	NA	-1.52625
ccle_broad_2019	EOL1_HAEMATOPOIETIC_AND_LYMPHOID_TISSUE	1.90255	0.932877	0.381962	NA	NA	NA	0.302018	NA	NA	1.09065	1.78565	NA	1.20546	NA	1.91614	-0.111255	-0.548847	NA	NA	NA	NA	2.57542	-0.149745	-0.197099	0.983412	0.950087	NA	1.9058	-0.740656	0.0497279	1.60315	1.05318	1.19728	-0.27405	1.3205	NA	0.931787	-1.59594	NA	NA	NA	1.09463	0.00300905	-0.775261	NA	0.540863	-0.805611	-1.34409
ccle_broad_2019	JHUEM2_ENDOMETRIUM	1.9095	1.65023	0.817826	NA	NA	NA	0.528563	0.770048	NA	-1.1647	0.681881	0.0810495	-0.0804639	1.5205	0.0282502	1.09007	-1.36083	NA	NA	NA	NA	-0.262752	-0.425493	0.958935	1.81945	1.80036	NA	1.59807	0.870356	0.725624	-0.0172958	0.405637	0.145417	NA	0.819318	NA	-0.0905915	-0.194032	NA	NA	NA	-0.548256	-0.435067	0.0763476	NA	0.763622	0.913782	0.166238
ccle_broad_2019	MONOMAC1_HAEMATOPOIETIC_AND_LYMPHOID_TISSUE	1.9565	0.123026	1.4876	NA	NA	NA	NA	-2.04921	NA	0.551232	1.22142	NA	-1.5625	NA	1.29095	1.3968	-0.00236736	NA	NA	NA	-0.610634	2.26974	-1.65987	-1.81144	-0.86521	0.786364	NA	-0.0661526	-0.559825	-1.9028	NA	1.00251	0.231983	NA	-1.28227	-0.728835	NA	-0.160681	NA	NA	NA	-1.06407	0.497561	2.0939	NA	-0.591017	0.00569251	0.905018
ccle_broad_2019	REH_HAEMATOPOIETIC_AND_LYMPHOID_TISSUE	1.95944	1.99294	0.572413	2.08532	NA	NA	0.399145	NA	-0.0814768	-0.123008	-0.100103	NA	1.61397	NA	-0.817982	NA	-1.07556	NA	NA	NA	-0.368271	1.85644	-0.194591	0.355644	-0.147737	3.66939	NA	1.70768	-0.743071	-0.357505	NA	0.618382	0.0204226	1.0169	2.05545	NA	NA	0.624437	NA	NA	NA	1.63721	2.95836	-0.241702	NA	1.72876	1.26445	-1.5944
ccle_broad_2019	K029AX_SKIN	1.98391	-1.2636	-0.176127	NA	NA	NA	0.958578	NA	NA	1.0364	-2.16261	NA	-1.75985	NA	-1.5451	0.271755	-1.54517	NA	NA	NA	NA	0.858035	0.74996	-0.654294	0.517119	-0.55229	NA	0.714775	1.66379	-0.493892	-0.994751	0.335358	0.117236	-0.353102	0.612605	NA	-0.779011	-0.44102	NA	NA	NA	-0.630998	-1.87792	0.00859781	NA	-1.52769	0.0547711	0.0469784
ccle_broad_2019	COLO205_LARGE_INTESTINE	2.22688	-0.849199	-2.36097	NA	NA	NA	-0.481718	-1.8198	NA	0.610743	-0.748188	NA	-0.919291	NA	-0.257335	NA	0.403482	0.582545	NA	NA	NA	-0.927794	-0.0381957	0.962519	0.887464	-2.34766	NA	-0.607254	0.244045	-0.907075	-0.403888	NA	1.33454	-2.47631	-0.147806	-0.665216	NA	0.0621875	-1.09456	NA	NA	-0.482724	-1.81938	0.144071	NA	-1.42408	NA	-1.14994
ccle_broad_2019	LK2_LUNG	2.26734	1.54237	NA	NA	NA	NA	-0.435176	0.520887	NA	-0.182132	0.668659	NA	1.52602	NA	1.00376	NA	NA	NA	NA	NA	NA	0.0422946	-0.410645	-0.440936	-1.03708	NA	NA	-0.0500706	-1.54754	0.506284	2.40271	-2.38236	NA	0.782041	0.663003	NA	NA	NA	NA	NA	NA	-1.12988	-0.747742	-0.13716	NA	0.0457378	0.17998	0.60945
ccle_broad_2019	KARPAS299_HAEMATOPOIETIC_AND_LYMPHOID_TISSUE	2.35922	0.65623	-0.762644	NA	NA	NA	2.78729	NA	NA	0.331085	1.13436	NA	-0.772925	NA	-0.263328	0.298113	2.16324	NA	NA	NA	NA	1.05513	-0.381169	-1.52527	1.86903	0.0797075	NA	-0.375403	-0.622371	0.419503	0.0495547	-0.20511	-0.720138	-0.2326	-0.325961	-0.619974	NA	NA	0.89612	NA	NA	-1.94672	-0.811633	-0.910252	NA	-0.965811	0.00610691	NA
ccle_broad_2019	697_HAEMATOPOIETIC_AND_LYMPHOID_TISSUE	2.68269	2.30871	-0.54724	1.96945	NA	NA	1.3261	NA	-0.313163	-0.933434	-0.294266	NA	2.07663	NA	-1.00682	NA	-1.10747	NA	NA	NA	-1.24697	0.944237	0.160766	0.375163	0.445658	2.8998	NA	1.976	-1.38102	-1.05219	NA	1.24381	2.80902	1.11436	0.46858	NA	NA	-0.357876	NA	NA	NA	0.533079	0.0785088	-0.279375	NA	1.58598	0.981302	-1.56811
ccle_broad_2019	THP1_HAEMATOPOIETIC_AND_LYMPHOID_TISSUE	2.77751	2.22546	2.11151	NA	NA	NA	0.443402	-0.0306723	-1.08235	-0.43184	1.19871	NA	0.587693	0.289374	0.95955	0.501206	-0.812933	NA	NA	NA	NA	0.336586	0.0803427	-0.766879	1.77221	1.54555	NA	0.294525	-0.808887	0.535365	NA	0.815395	1.58142	-0.364766	-0.971662	NA	NA	NA	NA	NA	NA	1.83182	1.33864	-0.784549	NA	-0.454648	-0.672274	0.0383697
ccle_broad_2019	JURKAT_HAEMATOPOIETIC_AND_LYMPHOID_TISSUE	2.82098	-0.665463	NA	NA	NA	NA	NA	-1.08342	0.0973489	-0.522434	0.69847	NA	0.861876	NA	NA	NA	NA	NA	NA	NA	NA	-1.078	-0.369247	0.675262	2.02618	0.998983	NA	1.16773	-1.29555	0.264228	NA	1.54639	NA	NA	NA	NA	NA	NA	0.596592	NA	NA	1.30299	-1.50132	NA	NA	1.53978	NA	-0.0859502
ccle_broad_2019	NCIH1435_LUNG	2.84394	-1.07004	0.604387	NA	NA	NA	-0.292413	NA	-0.189797	0.611735	-2.09031	NA	0.24917	0.96695	-3.10731	0.30142	0.664504	NA	-0.467392	NA	NA	-1.34268	-0.289387	0.211563	0.547481	-0.344385	NA	0.712784	0.222164	-0.57493	1.44082	0.888382	-0.0499224	1.07929	-1.01831	NA	NA	-1.61584	-0.72526	NA	NA	-0.0109227	-1.11169	-1.21324	NA	-0.894146	NA	-0.215719
ccle_broad_2019	OCIAML5_HAEMATOPOIETIC_AND_LYMPHOID_TISSUE	3.42466	1.61646	NA	NA	NA	NA	0.116314	-0.948366	0.885353	1.83641	-0.049993	0.209787	4.79929	NA	0.994417	NA	-1.09835	NA	NA	NA	NA	2.10024	0.763476	-0.190004	0.627135	0.898199	NA	1.43958	-0.978971	1.40254	NA	0.874235	NA	NA	-0.258823	NA	NA	NA	NA	NA	NA	0.943264	-0.538016	-0.593136	NA	1.05713	-0.623642	-2.79665
ccle_broad_2019	CHAGOK1_LUNG	4.10516	3.9453	1.41664	NA	NA	NA	NA	-1.4086	-2.87864	1.44788	-0.606515	NA	-0.453944	NA	-1.35186	NA	-1.1426	NA	NA	NA	NA	-0.950742	-0.0497383	0.393825	0.684254	1.44511	NA	-0.401905	-0.212855	-0.801912	NA	-1.15072	NA	NA	0.371501	NA	NA	NA	-0.402092	NA	NA	0.559436	-0.672332	NA	NA	1.25854	NA	-1.33008
ccle_broad_2019	UMUC3_URINARY_TRACT	NA	0.766105	-1.31052	NA	NA	NA	0.36027	0.810153	-0.022525	-1.18803	1.06019	NA	NA	NA	NA	NA	-0.156953	NA	NA	NA	NA	NA	-0.422107	0.19229	0.669077	0.254622	NA	1.29604	0.552843	0.365267	-0.851081	-0.310931	NA	NA	-0.624463	NA	NA	NA	NA	NA	NA	-0.938725	-1.03039	-0.503239	NA	0.023812	-0.107599	-0.174936
ccle_broad_2019	HT1080_SOFT_TISSUE	NA	-0.127896	-0.331548	NA	NA	NA	0.217023	-0.624077	NA	0.52218	1.35746	NA	-0.124964	NA	-0.0532537	0.220973	-0.723124	NA	-0.138204	NA	NA	1.30115	0.786914	1.0945	0.976011	1.27961	NA	0.933346	1.59326	-1.41989	NA	0.265571	NA	0.135474	1.53329	0.533267	NA	-0.33237	0.806049	NA	NA	0.0444126	-0.261005	-0.393006	NA	-0.299732	0.674453	0.0627339
ccle_broad_2019	NCIH226_LUNG	NA	-1.14722	0.775029	NA	NA	NA	-1.8161	0.102637	NA	-1.51792	-0.758179	NA	-0.660028	NA	-0.871308	0.0521962	1.09997	NA	-1.74355	NA	NA	-0.375997	-1.64998	0.0574415	-1.06963	-1.14368	NA	-0.4156	1.20388	-0.355672	NA	-0.686884	NA	-0.557108	0.114806	-1.00969	NA	0.150682	-0.840201	NA	NA	2.02683	0.794064	-0.0991296	NA	0.75836	-0.0991668	-0.0758641
ccle_broad_2019	NCIH1666_LUNG	NA	-1.48132	-0.970394	NA	NA	NA	-1.63169	0.788918	NA	-2.07968	2.12118	NA	-0.0455433	0.00746898	0.198833	NA	-0.211016	NA	NA	NA	NA	-0.109056	-2.34863	-1.12428	2.57228	NA	NA	-2.05228	-1.52414	1.61664	1.83897	-1.925	-0.623305	NA	-2.29164	NA	NA	1.01056	NA	NA	NA	-1.02935	-0.716181	2.53747	NA	1.4562	NA	0.551659
ccle_broad_2019	SW1783_CENTRAL_NERVOUS_SYSTEM	NA	0.401373	0.591108	NA	NA	NA	0.282394	-0.673306	-1.02982	0.499061	-0.0955112	NA	NA	NA	NA	NA	1.17724	NA	NA	NA	NA	NA	-0.479751	-0.831206	-0.362677	-0.578966	NA	-0.527833	-0.127423	-1.36515	0.0763044	-0.991678	NA	NA	-1.25329	NA	NA	NA	NA	NA	NA	-0.873657	-0.333463	-1.54335	NA	-1.27291	-0.792046	-0.192855
ccle_broad_2019	NCIH2291_LUNG	NA	0.906821	1.55902	NA	NA	NA	0.620317	0.840583	NA	2.749	1.21362	NA	0.288875	-0.117905	0.574361	NA	0.0712918	NA	NA	NA	NA	-1.26919	1.50411	1.44028	-0.103073	NA	NA	1.61899	0.220625	-0.790574	-2.98396	-0.372804	-0.251199	NA	2.09115	NA	NA	-1.82405	NA	NA	NA	2.45317	0.559553	-0.714578	NA	-0.0402873	NA	-1.09331
ccle_broad_2019	LMSU_STOMACH	NA	0.510235	1.86744	NA	NA	NA	0.830004	-0.342958	-0.35504	0.967877	-1.66273	NA	NA	NA	NA	NA	-1.55774	NA	NA	NA	NA	NA	5.0959	0.655714	0.831577	-0.933903	NA	0.0403188	-0.115621	0.335088	-0.221934	1.54976	NA	NA	-0.99662	NA	NA	NA	NA	NA	NA	0.312859	0.185597	-0.0562247	NA	-0.692602	0.791169	-0.164367
ccle_broad_2019	NCIH838_LUNG	NA	0.148476	1.14128	NA	NA	NA	-0.0899096	0.856239	NA	0.701124	-1.30255	NA	0.657245	-0.195836	-0.848996	NA	0.154244	NA	NA	NA	NA	-1.0165	-0.273091	-0.258746	-0.233806	NA	NA	-0.503709	-0.0354052	0.309071	-0.618773	-0.244832	-0.576449	NA	-0.851058	NA	NA	0.406866	NA	NA	NA	-1.19222	-0.755131	-0.196926	NA	0.655459	NA	0.471001
ccle_broad_2019	SNUC5_LARGE_INTESTINE	NA	NA	NA	NA	NA	NA	-0.866334	0.083033	0.68563	-2.40301	0.775154	NA	NA	NA	NA	NA	NA	NA	NA	NA	NA	-0.899795	-0.873978	0.472188	-1.18205	0.692768	NA	-0.90454	0.718603	1.18814	NA	-0.493673	0.0173139	NA	0.0235567	NA	NA	NA	NA	NA	NA	1.65108	0.795256	-1.02665	NA	0.684712	NA	-0.58498
ccle_broad_2019	JHH4_LIVER	NA	NA	NA	NA	NA	NA	0.378844	-0.153206	-0.464459	1.03113	-0.643667	NA	NA	NA	NA	NA	NA	NA	NA	NA	NA	-0.411076	0.551987	1.22512	1.65307	0.207216	NA	0.134831	0.202565	-1.41357	NA	0.267029	-0.964559	NA	-0.409093	NA	NA	NA	NA	NA	NA	-0.444608	0.126428	-0.884127	NA	0.950671	NA	-0.256684
ccle_broad_2019	JHH1_LIVER	NA	0.314712	1.03999	NA	NA	NA	-0.622554	-0.706385	NA	-0.174848	0.21039	NA	0.529934	NA	0.460064	-0.28182	-2.58547	NA	0.797816	NA	NA	-0.660591	0.74486	-0.27484	-0.485733	-0.465055	NA	0.587704	-0.449715	-0.0495379	NA	-0.279322	NA	0.401842	-0.582077	-0.876306	NA	-0.0089881	-0.72694	NA	NA	0.868954	-1.39629	-0.836643	NA	1.39056	0.370067	1.59361
ccle_broad_2019	J82_URINARY_TRACT	NA	NA	NA	NA	NA	NA	0.874188	-0.708614	0.360625	2.32265	-0.665569	NA	NA	NA	NA	NA	NA	NA	NA	NA	NA	1.11204	1.11656	1.90756	0.908881	0.589545	NA	1.07242	1.31854	-1.58466	NA	0.496339	-0.286406	NA	0.070362	NA	NA	NA	NA	NA	NA	-0.525859	0.46021	-0.102182	NA	-0.752215	NA	0.236494
ccle_broad_2019	MFE319_ENDOMETRIUM	NA	-1.01566	-0.277594	NA	NA	NA	-0.716039	1.37649	1.50138	-1.30867	0.342302	NA	NA	NA	NA	NA	-0.521159	NA	NA	NA	NA	NA	-1.54222	-0.397093	-1.58952	0.97021	NA	0.105976	0.137275	1.02591	1.19517	-0.413803	NA	NA	0.120248	NA	NA	NA	NA	NA	NA	1.49976	0.25945	0.406066	NA	2.63238	0.273266	-0.936905
ccle_broad_2019	SW1271_LUNG	NA	0.296775	-1.82826	NA	NA	NA	-1.21604	0.236466	NA	0.401172	0.413849	NA	0.0131684	NA	-0.104102	-0.0676555	1.44003	NA	0.395373	NA	NA	-1.48848	0.48667	-0.613836	-0.960713	-0.293236	NA	-0.248091	0.593221	0.104065	NA	-0.528796	NA	-0.395602	-0.408347	-0.853872	NA	0.487086	0.00438624	NA	NA	-1.79292	-0.673604	1.56661	NA	-1.20799	-0.481619	0.848504
ccle_broad_2019	U2OS_BONE	NA	-0.224602	-0.662833	NA	NA	NA	-1.16475	0.492585	NA	-0.0614132	-1.34884	NA	-0.311735	NA	0.775561	-0.741927	-0.715232	NA	0.329623	NA	NA	1.0772	-0.436513	0.555758	-0.413571	-0.0473554	NA	-0.701607	0.496881	-0.829315	NA	0.457089	NA	-0.0502286	-0.176537	0.163478	NA	-0.385346	0.750172	NA	NA	1.21026	1.21206	-1.61667	NA	-1.04801	1.76528	-0.134578
ccle_broad_2019	HCC1143_BREAST	NA	-0.026735	-0.699274	NA	NA	NA	-0.667201	-0.632757	NA	-1.17588	-1.47656	NA	-0.320944	0.405672	0.126299	NA	1.37288	NA	NA	NA	NA	0.739911	-2.02233	-0.762958	-1.15642	NA	NA	-0.680119	0.685016	0.790678	1.51741	0.0140838	-0.274564	NA	-1.07374	NA	NA	0.94097	NA	NA	NA	-1.21671	-0.197534	0.284892	NA	-0.578946	NA	0.954655
ccle_broad_2019	IALM_LUNG	NA	0.723825	0.534713	NA	NA	NA	-1.07353	0.269136	NA	0.0672691	3.21186	NA	-0.0531877	NA	-1.20869	0.842025	0.890842	NA	0.572153	NA	NA	-1.72819	-0.984038	1.12011	-0.290117	-0.387921	NA	0.689556	-0.949457	-0.62664	NA	-0.0102482	NA	-0.0924361	0.74004	-0.540049	NA	-0.227656	0.083498	NA	NA	-0.719597	0.186101	1.03638	NA	0.585048	-0.456044	0.672198
ccle_broad_2019	JHH6_LIVER	NA	0.0159115	0.344525	NA	NA	NA	-0.215318	-0.407892	-0.0888317	0.821087	-0.504307	NA	NA	NA	NA	NA	0.429771	NA	NA	NA	NA	NA	-0.0430646	0.0203226	0.921519	-0.296947	NA	-1.06496	0.654003	-1.00657	-0.0388776	0.111222	NA	NA	1.55381	NA	NA	NA	NA	NA	NA	-0.270075	0.619368	-0.62537	NA	-0.0901087	0.703529	1.09452
ccle_broad_2019	HCC1833_LUNG	NA	NA	NA	NA	NA	NA	-0.366514	1.9092	0.768479	-1.76801	-1.94518	NA	NA	NA	NA	NA	NA	NA	NA	NA	NA	-0.0522852	0.0071752	-0.106601	-0.0932802	-0.316345	NA	-1.03629	-0.769477	2.0886	NA	-0.705319	0.239169	NA	0.133649	NA	NA	NA	NA	NA	NA	-1.03684	1.12625	0.0662203	NA	0.146058	NA	-0.167438
ccle_broad_2019	GB1_CENTRAL_NERVOUS_SYSTEM	NA	0.138897	1.3656	NA	NA	NA	1.16826	0.311307	NA	-1.07163	-0.930628	NA	0.221508	NA	-0.112136	0.395326	-0.541434	NA	-0.187882	NA	NA	1.69567	-1.05518	-0.135701	1.76329	0.351936	NA	0.169106	-0.934207	0.460002	NA	1.49144	NA	-1.02807	-0.404137	2.90809	NA	-0.818051	-0.316681	NA	NA	-1.42269	1.27992	0.23963	NA	-0.0136587	-1.04623	-2.183
ccle_broad_2019	OVSAHO_OVARY	NA	NA	NA	NA	NA	NA	-1.19544	-0.984108	-0.45589	-3.67655	0.173676	NA	NA	NA	NA	NA	NA	NA	NA	NA	NA	-0.693309	-2.06014	-0.628932	-0.942001	-0.431336	NA	-2.39699	-1.49956	0.329483	NA	-0.942546	1.85663	NA	-0.43346	NA	NA	NA	NA	NA	NA	-1.38079	-0.329007	1.66735	NA	0.678115	NA	0.733424
ccle_broad_2019	RERFLCSQ1_LUNG	NA	0.788524	1.44477	NA	NA	NA	-0.773952	-0.898525	NA	-0.100078	-0.39829	NA	-2.50445	0.283439	-0.966707	NA	-0.263032	NA	NA	NA	NA	-0.193386	0.365799	0.0552381	-0.975948	NA	NA	-0.792345	0.385789	-2.0982	0.521144	-0.998124	-0.0838813	NA	-0.00104309	NA	NA	-1.22015	NA	NA	NA	-0.394492	0.520642	-1.29432	NA	-2.12114	NA	2.86093
ccle_broad_2019	FUOV1_OVARY	NA	0.584669	0.0438032	NA	NA	NA	-0.671301	0.358342	NA	-0.795712	-0.0641221	NA	1.97325	0.133197	-0.310019	NA	-0.20198	NA	NA	NA	NA	-0.407141	-0.654611	-0.169505	-0.67524	NA	NA	0.637213	-0.550696	1.8685	0.840606	0.377988	1.31337	NA	0.701962	NA	NA	1.36045	NA	NA	NA	-2.14201	1.35972	1.00348	NA	1.1559	NA	-1.31491
ccle_broad_2019	PANC0403_PANCREAS	NA	NA	NA	NA	NA	NA	-1.54715	-0.0761527	0.393307	-2.49729	0.17163	NA	NA	NA	NA	NA	NA	NA	NA	NA	NA	0.28263	-1.37559	0.0705246	-0.725631	-1.92	NA	-1.82591	-0.975178	-0.476409	NA	-0.248314	-0.881078	NA	-0.244961	NA	NA	NA	NA	NA	NA	2.19374	0.00334552	-2.29756	NA	-0.821985	NA	1.58092
ccle_broad_2019	RL_HAEMATOPOIETIC_AND_LYMPHOID_TISSUE	NA	NA	NA	NA	NA	NA	0.654023	-0.171923	0.210424	-0.188075	-0.485647	NA	NA	NA	NA	NA	NA	NA	NA	NA	NA	0.194357	0.549781	-2.25562	-0.0407167	0.446454	NA	0.636583	-1.23037	1.04725	NA	-0.673934	-0.772348	NA	-0.0553157	NA	NA	NA	NA	NA	NA	0.541287	-1.95417	-0.648219	NA	-1.27455	NA	-0.884604
ccle_broad_2019	HDMYZ_HAEMATOPOIETIC_AND_LYMPHOID_TISSUE	NA	0.849419	-0.42455	NA	NA	NA	2.17922	-0.211027	0.129892	-0.296711	-0.290054	NA	NA	NA	NA	NA	0.236145	NA	NA	NA	NA	NA	0.0686461	1.44958	0.380629	0.103774	NA	0.101881	-0.808422	0.892226	-2.10105	0.576112	NA	NA	0.218731	NA	NA	NA	NA	NA	NA	0.464635	-0.499133	0.189004	NA	-1.21826	-0.444836	-0.702588
ccle_broad_2019	AGS_STOMACH	NA	-2.13701	-1.64412	NA	NA	NA	0.674811	0.849985	NA	-0.697918	1.68338	NA	-0.558811	0.447594	1.17787	NA	-0.452906	NA	NA	NA	NA	-0.657121	-0.57715	0.233642	0.603982	NA	NA	-0.269328	-0.429099	0.322495	-2.59054	-0.0298941	0.292465	NA	0.875494	NA	NA	0.809634	NA	NA	NA	2.22464	-0.358432	-1.25609	NA	1.5815	NA	-0.785925
ccle_broad_2019	DETROIT562_UPPER_AERODIGESTIVE_TRACT	NA	-0.556707	-0.764482	NA	NA	NA	-0.388601	-1.09892	NA	-0.910528	-0.999426	NA	-1.05167	-1.55774	-0.968583	NA	-0.48013	NA	NA	NA	NA	1.19105	1.37203	-0.190204	-0.251148	NA	NA	0.0261264	-0.157118	-0.364135	0.67573	0.489776	0.0257486	NA	-0.465738	NA	NA	-0.77962	NA	NA	NA	1.15529	-1.24813	0.305299	NA	-2.11118	NA	-0.44169
ccle_broad_2019	NCIH747_LARGE_INTESTINE	NA	0.874785	-0.38202	NA	NA	NA	0.409633	-0.891806	NA	1.09803	0.0270158	NA	-0.209354	0.287884	0.552547	NA	0.786506	NA	NA	NA	NA	1.85831	1.29846	0.616557	-0.383548	NA	NA	1.50217	1.73456	0.141816	0.373373	1.45438	0.496772	NA	-0.274575	NA	NA	0.233513	NA	NA	NA	0.0467089	-0.0872043	0.527524	NA	0.187768	NA	-0.713596
ccle_broad_2019	HUPT4_PANCREAS	NA	-1.36878	-1.48744	NA	NA	NA	-0.295963	0.578453	0.692652	-0.00214471	1.06587	NA	NA	NA	NA	NA	0.775575	NA	NA	NA	NA	NA	-0.0360615	-0.322674	-1.37295	-0.40447	NA	1.14491	0.979237	-1.02266	-0.241591	-0.385005	NA	NA	0.335591	NA	NA	NA	NA	NA	NA	0.763375	0.931145	1.17667	NA	-0.0344109	-0.170834	0.0776475
ccle_broad_2019	KYSE30_OESOPHAGUS	NA	0.0113724	-0.0987302	NA	NA	NA	0.162784	0.807082	NA	0.0707148	0.819766	NA	0.216474	NA	0.946064	-0.132541	1.08582	NA	1.26603	NA	NA	-0.499558	0.0546202	0.40896	-0.772597	-1.2365	NA	-1.3429	0.384715	1.11422	NA	-0.559874	NA	0.097753	-0.942469	0.243831	NA	0.810836	-0.00633173	NA	NA	0.795356	-0.634575	2.06897	NA	-0.03681	-1.15627	0.691211
ccle_broad_2019	HDQP1_BREAST	NA	-1.07868	0.226586	NA	NA	NA	-1.28983	-0.657085	0.383581	-0.856322	-0.553395	NA	NA	NA	NA	NA	-1.02676	NA	NA	NA	NA	NA	-1.39525	-0.274783	-0.595778	-0.552379	NA	-2.27776	0.538132	-0.648797	0.584099	-0.819783	NA	NA	0.700228	NA	NA	NA	NA	NA	NA	-0.694978	0.234119	1.47441	NA	0.170161	0.776869	0.26758
ccle_broad_2019	8505C_THYROID	NA	NA	NA	NA	NA	NA	-0.603601	-0.234267	-0.708003	2.01417	1.3569	NA	NA	NA	NA	NA	NA	NA	NA	NA	NA	-0.167658	1.8091	1.38265	1.51454	-0.858176	NA	0.916659	1.11664	-1.18917	NA	1.54424	2.08384	NA	0.639422	NA	NA	NA	NA	NA	NA	0.715055	0.323929	0.578425	NA	0.0421804	NA	-0.210555
ccle_broad_2019	L428_HAEMATOPOIETIC_AND_LYMPHOID_TISSUE	NA	0.266726	-1.22531	NA	NA	NA	-1.27565	0.0368273	-1.0481	1.62392	1.30811	NA	NA	NA	NA	NA	0.887689	NA	NA	NA	NA	NA	-0.385316	0.227831	1.88904	0.968648	NA	0.888081	-1.65485	0.860725	0.242084	1.19277	NA	NA	1.01585	NA	NA	NA	NA	NA	NA	0.397247	0.308305	-0.505544	NA	0.0310057	-0.526318	-0.784941
ccle_broad_2019	SUDHL6_HAEMATOPOIETIC_AND_LYMPHOID_TISSUE	NA	NA	NA	NA	NA	NA	2.8652	0.0081765	0.167654	3.09831	1.32846	NA	NA	NA	NA	NA	NA	NA	NA	NA	NA	1.04177	0.424866	-2.35165	-0.876895	1.95378	NA	2.98967	0.671173	0.751608	NA	0.143251	-0.731781	NA	1.07444	NA	NA	NA	NA	NA	NA	-1.32772	0.748684	1.82106	NA	0.562545	NA	-1.61877
ccle_broad_2019	REC1_HAEMATOPOIETIC_AND_LYMPHOID_TISSUE	NA	0.389876	-0.423449	NA	NA	NA	3.43613	-0.948748	NA	2.27238	-2.78683	NA	0.101435	NA	0.571301	0.021964	0.237452	NA	-0.563851	NA	NA	0.764555	1.95683	-2.26149	1.03625	1.87466	NA	0.495201	-1.36188	1.26586	NA	-0.350177	NA	1.89777	-0.139501	-0.820104	NA	0.539961	-0.0578544	NA	NA	-0.236417	0.0713908	-1.61734	NA	-0.0281941	0.31532	-3.81599
[truncated: 319 more columns]
