# Supplementary material for: Super-enhancers reorganization controls re-sensitization of oxaliplatin-resistant FBXW7-mutated colorectal cancer
Source: Research Square preprint supplement (doi:10.21203/rs.3.rs-4758082/v1), 2024-07-30
Supplement: Supplementary file 7 [file acf159c36bf4bff4b103b35a.xlsx]

## Sheet: Foglio 1
Table S8: expression levels of genes, associated to SE gained after HDAC4 depletion in CRC cells and PDOs, in CRC patients found to be sensitive to FOLFOX treatment vs resistant (GSE72970)
ID	adj.P.Val	P.Value	t	B	logFC	Gene.symbol	Gene.title
222697_s_at	1	0.44852	-0.766855	-4.7	-0.182055	ABHD10	abhydrolase domain containing 10
232007_at	1	0.0956507	-1.71446	-4.32	-0.28975	AGPAT5	1-acylglycerol-3-phosphate O-acyltransferase 5
236034_at	1	0.0854198	-1.77223	-4.29	-0.40574	ANGPT2	angiopoietin 2
1555421_at	1	0.474837	-0.722742	-4.72	-0.0786798	AP1S3	adaptor related protein complex 1 sigma 3 subunit
212970_at	1	0.370213	-0.908247	-4.66	-0.168761	APBB2	amyloid beta precursor protein binding family B member 2
225171_at	1	0.642939	0.46781	-4.77	0.124501	ARHGAP18	Rho GTPase activating protein 18
215037_s_at	1	0.689857	0.402511	-4.78	0.140349	BCL2L1	BCL2 like 1
232761_at	1	0.326632	0.995445	-4.63	0.122826	COX4I2	cytochrome c oxidase subunit 4I2
238554_at	1	0.270212	-1.12105	-4.59	-0.319452	CYB5B	cytochrome b5 type B
206424_at	1	0.128027	1.56042	-4.4	0.218911	CYP26A1	cytochrome P450 family 26 subfamily A member 1
244692_at	1	0.680934	0.414785	-4.78	0.0751344	CYP4F22	cytochrome P450 family 4 subfamily F member 22
212650_at	1	0.491782	-0.695081	-4.72	-0.1623	EHBP1	EH domain binding protein 1
224657_at	1	0.890945	0.138152	-4.8	0.0386165	ERRFI1	ERBB receptor feedback inhibitor 1
228870_at	1	0.0987677	1.6979	-4.33	0.218772	FAM84B	family with sequence similarity 84 member B
244442_at	1	0.564385	-0.582097	-4.75	-0.0712016	HORMAD2	HORMA domain containing 2
213991_s_at	1	0.364096	0.920062	-4.66	0.0821108	HS3ST1	heparan sulfate-glucosamine 3-sulfotransferase 1
1552814_a_at	1	0.642903	-0.467862	-4.77	-0.0526897	KLF14	Kruppel like factor 14
216839_at	1	0.464443	-0.739989	-4.71	-0.0510871	LAMA2	laminin subunit alpha 2
205266_at	1	0.766412	-0.299488	-4.79	-0.0762511	LIF	leukemia inhibitory factor
244171_at	1	0.477881	0.717732	-4.72	0.17896	MKLN1	muskelin 1
217518_at	1	0.269403	1.12298	-4.59	0.204839	MYOF	myoferlin
240311_at	1	0.439658	0.782052	-4.7	0.117326	NANOS3	nanos C2HC-type zinc finger 3
213325_at	1	0.76319	0.303751	-4.79	0.122578	NECTIN3	nectin cell adhesion molecule 3
207333_at	1	0.593731	0.538572	-4.76	0.0521649	NMBR	neuromedin B receptor
238983_at	1	0.800245	0.255041	-4.8	0.069626	NSUN7	NOP2/Sun RNA methyltransferase family member 7
208558_at	1	0.127662	1.56197	-4.4	0.394072	OR10H1	olfactory receptor family 10 subfamily H member 1
225688_s_at	1	0.145179	1.49141	-4.43	0.646892	PHLDB2	pleckstrin homology like domain family B member 2
214532_x_at	1	0.102422	1.67902	-4.34	0.189539	POU5F1B	POU class 5 homeobox 1B
208549_x_at	1	0.111613	1.6339	-4.36	0.220765	PTMA	prothymosin, alpha
218704_at	1	0.0856193	1.77105	-4.29	0.489475	RNF43	ring finger protein 43
204035_at	1	0.962255	0.0476779	-4.81	0.0147882	SCG2	secretogranin II
230458_at	1	0.0628864	-1.92376	-4.2	-0.199786	SLC45A1	solute carrier family 45 member 1
201483_s_at	1	0.68581	0.40807	-4.78	0.076502	SUPT4H1	SPT4 homolog, DSIF elongation factor subunit
1555185_x_at	1	0.503873	0.675668	-4.73	0.0712709	TERF2	telomeric repeat binding factor 2
1557137_at	1	0.853062	0.186644	-4.8	0.0583104	TMEM17	transmembrane protein 17
231915_at	1	0.709302	0.37597	-4.78	0.0640113	ZSWIM4	zinc finger SWIM-type containing 4
Table S8: expression levels of genes, associated to SE lost after HDAC4 depletion in CRC cells and PDOs, in CRC patients found to be sensitive to FOLFOX treatment vs resistant (GSE72970)
ID	adj.P.Val	P.Value	t	B	logFC	Gene.symbol	Gene.title
209576_at	1	0.0293628	-2.27565	-3.99	-0.790492	GNAI1	G protein subunit alpha i1
217996_at	1	0.164204	-1.42212	-4.46	-0.512236	PHLDA1	pleckstrin homology like domain family A member 1
242037_at	1	0.0617033	-1.93294	-4.2	-0.441897	ASPH	aspartate beta-hydroxylase
218451_at	1	0.0071643	-2.86358	-3.59	-0.437493	CDCP1	CUB domain containing protein 1
204455_at	1	0.0386503	-2.15223	-4.07	-0.435342	DST	dystonin
209626_s_at	1	0.115982	-1.61352	-4.37	-0.410433	OSBPL3	oxysterol binding protein like 3
231852_at	1	0.181416	-1.36469	-4.49	-0.383521	ERI1	exoribonuclease 1
227542_at	1	0.132676	-1.54101	-4.41	-0.360168	SOCS6	suppressor of cytokine signaling 6
206583_at	1	0.107241	-1.65496	-4.35	-0.35223	KRBOX4	KRAB box domain containing 4
229810_at	1	0.212133	-1.27191	-4.53	-0.351741	RSPH3	radial spoke 3 homolog
219298_at	1	0.400896	-0.850808	-4.68	-0.335781	ECHDC3	enoyl-CoA hydratase domain containing 3
205466_s_at	1	0.18922	-1.34004	-4.5	-0.331285	HS3ST1	heparan sulfate-glucosamine 3-sulfotransferase 1
222421_at	1	0.127786	-1.56144	-4.4	-0.321696	UBE2H	ubiquitin conjugating enzyme E2 H
238451_at	1	0.3986	-0.855007	-4.68	-0.317311	MPP7	membrane palmitoylated protein 7
231984_at	1	0.192801	-1.32899	-4.51	-0.305637	MTAP	methylthioadenosine phosphorylase
214422_at	1	0.159231	-1.43959	-4.46	-0.303938	RAD23B	RAD23 homolog B, nucleotide excision repair protein
213816_s_at	1	0.370127	-0.908412	-4.66	-0.301805	MET	MET proto-oncogene, receptor tyrosine kinase
210942_s_at	1	0.276521	-1.10614	-4.6	-0.266777	ST3GAL6	ST3 beta-galactoside alpha-2,3-sialyltransferase 6
1554014_at	1	0.331444	-0.985447	-4.64	-0.249168	CHD2	chromodomain helicase DNA binding protein 2
238164_at	1	0.290229	-1.07455	-4.61	-0.238764	USP6NL	USP6 N-terminal like
225093_at	1	0.294109	-1.0658	-4.61	-0.236234	UTRN	utrophin
38671_at	1	0.263639	-1.13685	-4.58	-0.234287	PLXND1	plexin D1
214732_at	1	0.267869	-1.12665	-4.59	-0.231171	SP1	Sp1 transcription factor
200071_at	1	0.263617	-1.13691	-4.58	-0.230757	SMNDC1	survival motor neuron domain containing 1
231853_at	1	0.247458	-1.17701	-4.57	-0.224546	TUBD1	tubulin delta 1
225896_at	1	0.227088	-1.2304	-4.55	-0.223258	MPRIP	myosin phosphatase Rho interacting protein
227046_at	1	0.0872752	-1.76134	-4.29	-0.221901	SLC39A11	solute carrier family 39 member 11
244007_at	1	0.14868	-1.47814	-4.44	-0.220515	ZNF462	zinc finger protein 462
212985_at	1	0.442237	-0.777611	-4.7	-0.219566	APBB2	amyloid beta precursor protein binding family B member 2
204622_x_at	1	0.512933	-0.661291	-4.73	-0.217492	NR4A2	nuclear receptor subfamily 4 group A member 2
221371_at	1	0.0691661	-1.87738	-4.23	-0.206973	TNFSF18	tumor necrosis factor superfamily member 18
210865_at	1	0.242662	-1.18928	-4.56	-0.204373	FASLG	Fas ligand
230458_at	1	0.0628864	-1.92376	-4.2	-0.199786	SLC45A1	solute carrier family 45 member 1
222379_at	1	0.535958	-0.625359	-4.74	-0.193935	KCNE4	potassium voltage-gated channel subfamily E regulatory subunit 4
243206_at	1	0.114116	-1.62214	-4.37	-0.189291	CEP95	centrosomal protein 95
236129_at	1	0.642353	-0.468639	-4.77	-0.185158	GALNT5	polypeptide N-acetylgalactosaminyltransferase 5
202132_at	1	0.445524	-0.771972	-4.7	-0.183479	WWTR1	WW domain containing transcription regulator 1
1568735_at	1	0.0360861	-2.1834	-4.05	-0.177304	DLGAP1	DLG associated protein 1
218559_s_at	1	0.68883	-0.40392	-4.78	-0.172227	MAFB	MAF bZIP transcription factor B
232020_at	1	0.600215	-0.529097	-4.76	-0.17048	SMURF2	SMAD specific E3 ubiquitin protein ligase 2
1554790_at	1	0.204129	-1.29504	-4.52	-0.165958	ZSCAN20	zinc finger and SCAN domain containing 20
202171_at	1	0.27181	-1.11725	-4.59	-0.163746	VEZF1	vascular endothelial zinc finger 1
210143_at	1	0.586638	-0.548995	-4.75	-0.162641	ANXA10	annexin A10
226513_at	1	0.449562	-0.765081	-4.7	-0.159575	ASB7	ankyrin repeat and SOCS box containing 7
235890_at	1	0.493961	-0.691563	-4.72	-0.149623	TBL1XR1	transducin (beta)-like 1 X-linked receptor 1
236864_at	1	0.188046	-1.3437	-4.5	-0.145207	SYTL3	synaptotagmin like 3
213865_at	1	0.549708	-0.604291	-4.74	-0.141993	DCBLD2	discoidin, CUB and LCCL domain containing 2
238131_at	1	0.102384	-1.67921	-4.34	-0.13704	PHC2	polyhomeotic homolog 2
204423_at	1	0.513458	-0.660462	-4.73	-0.116005	MKLN1	muskelin 1
1552813_at	1	0.330474	-0.987456	-4.64	-0.106583	KLF14	Kruppel like factor 14
203072_at	1	0.527459	-0.638525	-4.73	-0.106484	MYO1E	myosin IE
202609_at	1	0.589307	-0.545066	-4.75	-0.0975753	EPS8	epidermal growth factor receptor pathway substrate 8
228361_at	1	0.488725	-0.70003	-4.72	-0.0965012	E2F2	E2F transcription factor 2
209457_at	1	0.775676	-0.287261	-4.79	-0.0925225	DUSP5	dual specificity phosphatase 5
227964_at	1	0.663164	-0.439427	-4.77	-0.0885418	FRMD8	FERM domain containing 8
237856_at	1	0.495265	-0.689462	-4.72	-0.0858995	RAP1GDS1	Rap1 GTPase-GDP dissociation stimulator 1
1553574_at	1	0.345141	-0.957519	-4.65	-0.0846355	IFNE	interferon epsilon
210712_at	1	0.341118	-0.965646	-4.64	-0.082718	LDHAL6B	lactate dehydrogenase A like 6B
222969_at	1	0.405316	-0.842766	-4.68	-0.0814941	B3GALT1	beta-1,3-galactosyltransferase 1
1555421_at	1	0.474837	-0.722742	-4.72	-0.0786798	AP1S3	adaptor related protein complex 1 sigma 3 subunit
1569033_at	1	0.489	-0.699584	-4.72	-0.0753104	IGF2BP3	insulin like growth factor 2 mRNA binding protein 3
220194_at	1	0.529089	-0.635991	-4.74	-0.0656939	NSUN7	NOP2/Sun RNA methyltransferase family member 7
217230_at	1	0.68933	-0.403233	-4.78	-0.0649141	EZR	ezrin
227480_at	1	0.8163	-0.234135	-4.8	-0.0618703	SUSD2	sushi domain containing 2
1552669_at	1	0.502043	-0.67859	-4.73	-0.0599173	PPP1R3B	protein phosphatase 1 regulatory subunit 3B
236390_at	1	0.829259	-0.217338	-4.8	-0.0593672	SLX4IP	SLX4 interacting protein
51158_at	1	0.74692	-0.325367	-4.79	-0.0552124	FAM174B	family with sequence similarity 174 member B
216839_at	1	0.464443	-0.739989	-4.71	-0.0510871	LAMA2	laminin subunit alpha 2
219651_at	1	0.605623	-0.521231	-4.76	-0.044351	DPPA4	developmental pluripotency associated 4
1561125_at	1	0.733576	-0.343212	-4.79	-0.0401225	MTHFD1L	methylenetetrahydrofolate dehydrogenase (NADP+ dependent) 1-like
242297_at	1	0.85335	-0.186274	-4.8	-0.0389094	RREB1	ras responsive element binding protein 1
1568126_at	1	0.825424	-0.222302	-4.8	-0.0285457	ANXA2	annexin A2
218732_at	1	0.949367	-0.0639777	-4.81	-0.0101032	PTRH2	peptidyl-tRNA hydrolase 2
203180_at	1	0.978501	-0.02715	-4.81	-0.00821919	ALDH1A3	aldehyde dehydrogenase 1 family member A3
207641_at	1	0.969021	-0.0391268	-4.81	-0.00605661	TNFRSF13B	TNF receptor superfamily member 13B
217964_at	1	0.985966	-0.0177209	-4.81	-0.00320074	TTC19	tetratricopeptide repeat domain 19
204378_at	1	0.996341	-0.0046204	-4.81	-0.00152358	BCAS1	breast carcinoma amplified sequence 1
201579_at	1	0.996011	-0.0050367	-4.81	-0.00133764	FAT1	FAT atypical cadherin 1
204035_at	1	0.962255	0.0476779	-4.81	0.0147882	SCG2	secretogranin II
240667_at	1	0.906722	0.118061	-4.8	0.0168813	SERP2	stress-associated endoplasmic reticulum protein family member 2
233916_at	1	0.832673	0.212924	-4.8	0.0199482	NYAP2	neuronal tyrosine-phosphorylated phosphoinositide-3-kinase adaptor 2
1552340_at	1	0.820067	0.229246	-4.8	0.0217591	SP7	Sp7 transcription factor
238728_at	1	0.879063	0.153319	-4.8	0.023917	MRPS23	mitochondrial ribosomal protein S23
1569044_at	1	0.827021	0.220233	-4.8	0.024956	CDC42BPG	CDC42 binding protein kinase gamma
223469_at	1	0.901451	0.124768	-4.8	0.025518	PGPEP1	pyroglutamyl-peptidase I
207826_s_at	1	0.922606	0.0978839	-4.81	0.0281334	ID3	inhibitor of DNA binding 3, HLH protein
1555613_a_at	1	0.89165	0.137253	-4.8	0.0322597	ZAP70	zeta chain of T cell receptor associated protein kinase 70
224657_at	1	0.890945	0.138152	-4.8	0.0386165	ERRFI1	ERBB receptor feedback inhibitor 1
225447_at	1	0.859217	0.178738	-4.8	0.0409272	GPD2	glycerol-3-phosphate dehydrogenase 2
1563108_at	1	0.765637	0.300513	-4.79	0.0419877	ELFN2	extracellular leucine rich repeat and fibronectin type III domain containing 2
205582_s_at	1	0.854207	0.185172	-4.8	0.0456968	GGT5	gamma-glutamyltransferase 5
36865_at	1	0.679033	0.41741	-4.78	0.0464634	ANGEL1	angel homolog 1
209937_at	1	0.904222	0.12124	-4.8	0.0470853	TM4SF4	transmembrane 4 L six family member 4
229601_at	1	0.701235	0.386946	-4.78	0.0557693	SCYL1	SCY1 like pseudokinase 1
242979_at	1	0.831659	0.214233	-4.8	0.0570203	IRS1	insulin receptor substrate 1
1553584_at	1	0.636672	0.476683	-4.77	0.063703	CXorf36	chromosome X open reading frame 36
1569450_at	1	0.489754	0.698362	-4.72	0.0708923	CAPZA2	capping actin protein of muscle Z-line alpha subunit 2
220931_at	1	0.394747	0.862088	-4.68	0.0723417	SMIM2	small integral membrane protein 2
211708_s_at	1	0.864059	0.172526	-4.8	0.0724903	SCD	stearoyl-CoA desaturase
224648_at	1	0.618325	0.502884	-4.76	0.0796292	GPBP1	GC-rich promoter binding protein 1
208900_s_at	1	0.749027	0.322559	-4.79	0.0806382	TOP1	topoisomerase (DNA) I
205891_at	1	0.78774	0.271404	-4.79	0.0829118	ADORA2B	adenosine A2b receptor
209554_at	1	0.459138	0.74888	-4.71	0.0860925	CD36	CD36 molecule
223794_at	1	0.3329	0.982442	-4.64	0.0929911	ARMC4	armadillo repeat containing 4
208980_s_at	1	0.431653	0.795938	-4.7	0.0981596	UBC	ubiquitin C
1553241_at	1	0.425231	0.807192	-4.69	0.102022	NKAIN3	Na+/K+ transporting ATPase interacting 3
226536_at	1	0.514698	0.658507	-4.73	0.107231	NSMCE2	NSE2/MMS21 homolog, SMC5-SMC6 complex SUMO ligase
221576_at	1	0.624999	0.493313	-4.76	0.109106	GDF15	growth differentiation factor 15
208513_at	1	0.340312	0.96728	-4.64	0.122268	FOXB1	forkhead box B1
213325_at	1	0.76319	0.303751	-4.79	0.122578	NECTIN3	nectin cell adhesion molecule 3
233515_at	1	0.105164	1.66522	-4.35	0.122823	KRR1	KRR1, small subunit processome component homolog
225171_at	1	0.642939	0.46781	-4.77	0.124501	ARHGAP18	Rho GTPase activating protein 18
1567224_at	1	0.277931	1.10284	-4.6	0.124876	HMGA2	high mobility group AT-hook 2
1556793_a_at	1	0.318884	1.01175	-4.63	0.125014	FAM83C	family with sequence similarity 83 member C
200006_at	1	0.34814	0.951505	-4.65	0.125397	PARK7	Parkinsonism associated deglycase
1554335_at	1	0.339917	0.968082	-4.64	0.131836	CYTH4	cytohesin 4
219059_s_at	1	0.655864	0.449629	-4.77	0.138947	LYVE1	lymphatic vessel endothelial hyaluronan receptor 1
235972_at	1	0.355126	0.937624	-4.65	0.141634	TMEM131	transmembrane protein 131
203499_at	1	0.483072	0.709231	-4.72	0.160481	EPHA2	EPH receptor A2
203739_at	1	0.498602	0.684099	-4.72	0.161161	ZNF217	zinc finger protein 217
209098_s_at	1	0.666145	0.435275	-4.77	0.165223	JAG1	jagged 1
205859_at	1	0.400681	0.8512	-4.68	0.166566	LY86	lymphocyte antigen 86
226386_at	1	0.309473	1.03193	-4.62	0.172119	MALSU1	mitochondrial assembly of ribosomal large subunit 1
226047_at	1	0.527128	0.63904	-4.73	0.181133	MRVI1	murine retrovirus integration site 1 homolog
206337_at	1	0.476001	0.720824	-4.72	0.185143	CCR7	C-C motif chemokine receptor 7
214532_x_at	1	0.102422	1.67902	-4.34	0.189539	POU5F1B	POU class 5 homeobox 1B
244858_at	1	0.161643	1.43106	-4.46	0.192333	TGIF1	TGFB induced factor homeobox 1
207055_at	1	0.13306	1.53943	-4.41	0.198257	GPR37L1	G protein-coupled receptor 37 like 1
243189_at	1	0.472931	0.725888	-4.71	0.201077	NRF1	nuclear respiratory factor 1
207302_at	1	0.115115	1.61751	-4.37	0.202628	SGCG	sarcoglycan gamma
223365_at	1	0.0455317	2.07684	-4.11	0.203221	DHX37	DEAH-box helicase 37
217518_at	1	0.269403	1.12298	-4.59	0.204839	MYOF	myoferlin
201510_at	1	0.258368	1.14973	-4.58	0.204919	ELF3	E74 like ETS transcription factor 3
229672_at	1	0.31391	1.02237	-4.63	0.206067	UQCC1	ubiquinol-cytochrome c reductase complex assembly factor 1
222265_at	1	0.183677	1.35747	-4.49	0.206945	TNS4	tensin 4
228870_at	1	0.0987677	1.6979	-4.33	0.218772	FAM84B	family with sequence similarity 84 member B
206424_at	1	0.128027	1.56042	-4.4	0.218911	CYP26A1	cytochrome P450 family 26 subfamily A member 1
207326_at	1	0.195935	1.31945	-4.51	0.221683	BTC	betacellulin
203695_s_at	1	0.491562	0.695437	-4.72	0.235747	DFNA5	DFNA5, deafness associated tumor suppressor
214587_at	1	0.447421	0.76873	-4.7	0.239504	COL8A1	collagen type VIII alpha 1 chain
202936_s_at	1	0.278444	1.10164	-4.6	0.241417	SOX9	SRY-box 9
238583_at	1	0.140744	1.5086	-4.42	0.252608	MSRB3	methionine sulfoxide reductase B3
239029_at	1	0.125887	1.56955	-4.39	0.264439	TMCC1	transmembrane and coiled-coil domain family 1
214032_at	1	0.0785462	1.81442	-4.27	0.266355	ZAP70	zeta chain of T cell receptor associated protein kinase 70
1555345_at	1	0.0757332	1.8326	-4.26	0.273942	SLC38A4	solute carrier family 38 member 4
1562969_at	1	0.323863	1.00124	-4.63	0.275932	DNMBP	dynamin binding protein
210452_x_at	1	0.452597	0.759923	-4.71	0.278094	CYP4F2	cytochrome P450 family 4 subfamily F member 2
206155_at	1	0.225332	1.23517	-4.55	0.293226	ABCC2	ATP binding cassette subfamily C member 2
227530_at	1	0.458092	0.750639	-4.71	0.293657	AKAP12	A-kinase anchoring protein 12
208096_s_at	1	0.207697	1.28465	-4.52	0.301994	COL21A1	collagen type XXI alpha 1 chain
202241_at	1	0.136449	1.52566	-4.42	0.306282	TRIB1	tribbles pseudokinase 1
218986_s_at	1	0.156336	1.44996	-4.45	0.348495	DDX60	DEXD/H-box helicase 60
201631_s_at	1	0.0893295	1.7495	-4.3	0.370667	IER3	immediate early response 3
208558_at	1	0.127662	1.56197	-4.4	0.394072	OR10H1	olfactory receptor family 10 subfamily H member 1
202786_at	1	0.108113	1.6507	-4.35	0.402839	STK39	serine/threonine kinase 39
205767_at	1	0.253606	1.16153	-4.57	0.690555	EREG	epiregulin
1557285_at	1	0.0350917	2.19602	-4.04	0.7568	AREG	amphiregulin
