# Supplementary material for: Super-enhancers reorganization controls re-sensitization of oxaliplatin-resistant FBXW7-mutated colorectal cancer
Source: Research Square preprint supplement (doi:10.21203/rs.3.rs-4758082/v1), 2024-07-30
Supplement: Supplementary file 8 [file b180e5dc8142a26ad46cdd0f.xlsx]

## Sheet: Foglio1
Gained (cluster 3)	Lost (cluster 2)
CYP26A1	ANXA10
CYP4F2	ANXA2
MKLN1	ASPH
NMBR	BCAS1
NSUN7	CDCP1
OR10H1	DCBLD2
POU5F1B	DST
RNF43	E2F2
TERF2	EZR
	FAM174B
	FASLG
	GNAI1
	HS3ST1
	KCNE4
	LAMA2
	MAFB
	MPRIP
	MYO1E
	NR4A2
	OSBPL3
	PHC2
	PLXND1
	PTRH2
	RAD23B
	RAP1GDS1
	RREB1
	SMURF2
	SOCS6
	SP1
	ST3GAL6
	TBL1XR1
	TTC19
	TUBD1
	UBE2H
	UTRN
	VEZF1
	WWTR1
