# Supplementary material for: Super-enhancers reorganization controls re-sensitization of oxaliplatin-resistant FBXW7-mutated colorectal cancer
Source: Research Square preprint supplement (doi:10.21203/rs.3.rs-4758082/v1), 2024-07-30
Supplement: Supplementary file 9 [file b4e260229ec61f79a0c25711.xlsx]

## Sheet: Foglio1
		N super enhancer REP1 TSS FILTRED	N super enhancer REP2 TSS FILTRED	Dimension
CRC001	H3K27ac WT SICT UNT	759	717
CRC002	H3K27ac WT SICT OXPT	395	285
CRC003	H3K27ac WT SIHDAC4 UNT	512	505
CRC004	H3K27ac WT SIHDAC4 OXPT	723	455
CRC005	H3K27ac FBXW7 KO SICT UNT	288	150
CRC006	H3K27ac FBXW7 KO SICT OXPT	934	437
CRC007	H3K27ac FBXW7 KO SIHDAC4 UNT	564	66
CRC008	H3K27ac FBXW7 KO SIHDAC4 OXPT	404	189
CRC017	Input WT
CRC018	Input FBXW7 KO

## Sheet: CRC5
chr1	2160000	2680000	chr1	2181794	2184389	ENSG00000182873	5	-1	PRKCZ-AS1	lncRNA	2595
chr1	2160000	2680000	chr1	2212523	2220738	ENSG00000234396	3	1		lncRNA	8215
chr1	2160000	2680000	chr1	2315040	2323085	ENSG00000287356	1	1		lncRNA	8045
chr1	2160000	2680000	chr1	2350414	2352820	ENSG00000269896	2	-1		transcribed_processed_pseudogene	2406
chr1	2160000	2680000	chr1	2363061	2363628	ENSG00000272420	1	-1		lncRNA	567
chr1	2160000	2680000	chr1	2492300	2493258	ENSG00000224387	1	-1		lncRNA	958
chr1	2160000	2680000	chr1	2493437	2494479	ENSG00000229393	1	-1		lncRNA	1042
chr1	2160000	2680000	chr1	2528745	2530263	ENSG00000197921	6	-1	HES5	protein_coding	1518
chr1	2160000	2680000	chr1	2566410	2569888	ENSG00000225931	3	1		TEC	3478
chr1	2160000	2680000	chr1	2581560	2584533	ENSG00000228037	1	1		lncRNA	2973
chr1	2160000	2680000	chr1	2585610	2586060	ENSG00000289610	2	1		lncRNA	450
chr1	2160000	2680000	chr1	2632568	2636620	ENSG00000237058	1	1	MMEL1-AS1	lncRNA	4052
chr1	2160000	2680000	chr1	2184461	2212720	ENSG00000162585	17	-1	FAAP20	protein_coding	28259
chr1	2160000	2680000	chr1	2326201	2326693	ENSG00000272161	1	-1		lncRNA	492
chr1	2160000	2680000	chr1	2403964	2413797	ENSG00000157911	11	-1	PEX10	protein_coding	9833
chr1	2160000	2680000	chr1	2391775	2405442	ENSG00000157916	20	1	RER1	protein_coding	13667
chr1	2160000	2680000	chr1	2508537	2526597	ENSG00000157881	16	-1	PANK4	protein_coding	18060
chr1	2160000	2680000	chr1	2586491	2591469	ENSG00000157870	17	1	PRXL2B	protein_coding	4978
chr1	2160000	2680000	chr1	2555639	2565382	ENSG00000157873	18	1	TNFRSF14	protein_coding	9743
chr1	2160000	2680000	chr1	2530064	2547471	ENSG00000272449	3	1		lncRNA	17407
chr1	2160000	2680000	chr1	2549920	2557031	ENSG00000238164	6	-1	TNFRSF14-AS1	lncRNA	7111
chr1	2160000	2680000	chr1	2425980	2505532	ENSG00000149527	18	1	PLCH2	protein_coding	79552
chr1	2160000	2680000	chr1	2590639	2633016	ENSG00000142606	16	-1	MMEL1	protein_coding	42377
chr1	2160000	2680000	chr1	2321253	2391707	ENSG00000116151	14	-1	MORN1	protein_coding	70454
chr1	2160000	2680000	chr1	2636986	2801693	ENSG00000215912	13	-1	TTC34	protein_coding	43014
chr1	2160000	2680000	chr1	2227388	2310213	ENSG00000157933	11	1	SKI	protein_coding	82825
chr1	2160000	2680000	chr1	2050411	2185395	ENSG00000067606	17	1	PRKCZ	protein_coding	25395
chr1	7760000	8880000	chr1	7771296	7781432	ENSG00000049245	13	1	VAMP3	protein_coding	10136
chr1	7760000	8880000	chr1	7776383	7776775	ENSG00000269925	1	1		lncRNA	392
chr1	7760000	8880000	chr1	7942372	7942726	ENSG00000270330	1	1		processed_pseudogene	354
chr1	7760000	8880000	chr1	7982881	7982983	ENSG00000200344	1	-1	Y_RNA	misc_RNA	102
chr1	7760000	8880000	chr1	7998187	7999934	ENSG00000284716	1	-1		lncRNA	1747
chr1	7760000	8880000	chr1	8057245	8058463	ENSG00000232848	1	-1	RPL7AP18	processed_pseudogene	1218
chr1	7760000	8880000	chr1	8206434	8206597	ENSG00000200975	1	-1	RNU1-7P	snRNA	163
chr1	7760000	8880000	chr1	8218190	8220529	ENSG00000233645	1	-1		lncRNA	2339
chr1	7760000	8880000	chr1	8292157	8292263	ENSG00000251977	1	-1	RNU6-991P	snRNA	106
chr1	7760000	8880000	chr1	8328067	8328179	ENSG00000252254	1	1	Y_RNA	misc_RNA	112
chr1	7760000	8880000	chr1	8424645	8435013	ENSG00000232912	6	1	RERE-AS1	lncRNA	10368
chr1	7760000	8880000	chr1	8511795	8511919	ENSG00000221083	1	-1		snoRNA	124
chr1	7760000	8880000	chr1	8512653	8513021	ENSG00000270282	1	1		processed_pseudogene	368
chr1	7760000	8880000	chr1	8750430	8751087	ENSG00000234619	1	1	RPL7P11	processed_pseudogene	657
chr1	7760000	8880000	chr1	8786211	8786913	ENSG00000224315	2	-1	RPL7P7	processed_pseudogene	702
chr1	7760000	8880000	chr1	8796571	8796673	ENSG00000222511	2	-1	Y_RNA	misc_RNA	102
chr1	7760000	8880000	chr1	8798475	8799506	ENSG00000226545	1	1		unprocessed_pseudogene	1031
chr1	7760000	8880000	chr1	8805860	8807051	ENSG00000228423	2	-1		lncRNA	1191
chr1	7760000	8880000	chr1	8831007	8831375	ENSG00000229716	2	1	RPL23AP19	processed_pseudogene	368
chr1	7760000	8880000	chr1	8866502	8866590	ENSG00000274258	1	-1	MIR6728	miRNA	88
chr1	7760000	8880000	chr1	8878835	8879894	ENSG00000230679	1	1	ENO1-AS1	lncRNA	1059
chr1	7760000	8880000	chr1	7784291	7845177	ENSG00000049246	15	1	PER3	protein_coding	60886
chr1	7760000	8880000	chr1	7810242	7827342	ENSG00000236266	1	-1		lncRNA	17100
chr1	7760000	8880000	chr1	7843083	7853512	ENSG00000049247	14	-1	UTS2	protein_coding	10429
chr1	7760000	8880000	chr1	7915871	7943165	ENSG00000049249	10	-1	TNFRSF9	protein_coding	27294
chr1	7760000	8880000	chr1	7954291	7985505	ENSG00000116288	13	1	PARK7	protein_coding	31214
chr1	7760000	8880000	chr1	8026738	8122702	ENSG00000238290	1	1	ERRFI1-DT	lncRNA	95964
chr1	7760000	8880000	chr1	8004404	8026309	ENSG00000116285	13	-1	ERRFI1	protein_coding	21905
chr1	7760000	8880000	chr1	8189824	8192770	ENSG00000229305	1	1		processed_pseudogene	2946
chr1	7760000	8880000	chr1	8191692	8194926	ENSG00000288816	1	1		lncRNA	3234
chr1	7760000	8880000	chr1	8201518	8215210	ENSG00000227634	3	1	LINC01714	lncRNA	13692
chr1	7760000	8880000	chr1	8318114	8344167	ENSG00000162426	16	1	SLC45A1	protein_coding	26053
chr1	7760000	8880000	chr1	8861000	8879190	ENSG00000074800	16	-1	ENO1	protein_coding	18190
chr1	7760000	8880000	chr1	7991134	8005312	ENSG00000284747	1	1		lncRNA	14178
chr1	7760000	8880000	chr1	6785454	7769706	ENSG00000171735	21	1	CAMTA1	protein_coding	9706
chr1	7760000	8880000	chr1	8352397	8848921	ENSG00000142599	20	-1	RERE	protein_coding	496524
chr1	15760000	16560000	chr1	15792796	15793285	ENSG00000224321	1	1	RPL12P14	processed_pseudogene	489
chr1	15760000	16560000	chr1	15807169	15809348	ENSG00000233954	7	-1	UQCRHL	protein_coding	2179
chr1	15760000	16560000	chr1	15828232	15828669	ENSG00000178715	8	1		processed_pseudogene	437
chr1	15760000	16560000	chr1	15917698	15917908	ENSG00000270620	1	-1		unprocessed_pseudogene	210
chr1	15760000	16560000	chr1	15969632	15970194	ENSG00000234607	2	1		processed_pseudogene	562
chr1	15760000	16560000	chr1	15988182	15988441	ENSG00000231353	1	1		unprocessed_pseudogene	259
chr1	15760000	16560000	chr1	15989140	15989375	ENSG00000275503	1	-1		processed_pseudogene	235
chr1	15760000	16560000	chr1	16006160	16006671	ENSG00000233078	1	-1		lncRNA	511
chr1	15760000	16560000	chr1	16014028	16019594	ENSG00000173641	18	-1	HSPB7	protein_coding	5566
chr1	15760000	16560000	chr1	16159266	16161883	ENSG00000224621	1	1		lncRNA	2617
chr1	15760000	16560000	chr1	16155176	16158148	ENSG00000227959	2	1	EPHA2-AS1	lncRNA	2972
chr1	15760000	16560000	chr1	16197854	16198357	ENSG00000234166	1	1	ARHGEF19-AS1	lncRNA	503
chr1	15760000	16560000	chr1	16215907	16217425	ENSG00000291077	1	-1		lncRNA	1518
chr1	15760000	16560000	chr1	16228674	16231335	ENSG00000288398	1	-1		lncRNA	2661
chr1	15760000	16560000	chr1	16241213	16241398	ENSG00000233929	1	-1	MT1XP1	processed_pseudogene	185
chr1	15760000	16560000	chr1	16369150	16369530	ENSG00000226457	1	-1	RPL22P3	processed_pseudogene	380
chr1	15760000	16560000	chr1	16514122	16514285	ENSG00000206652	1	-1	RNU1-1	snRNA	163
chr1	15760000	16560000	chr1	16520694	16521796	ENSG00000224174	2	1		lncRNA	1102
chr1	15760000	16560000	chr1	16533886	16535649	ENSG00000233421	5	-1	LINC01783	lncRNA	1763
chr1	15760000	16560000	chr1	16534081	16534224	ENSG00000277344	1	-1	RNU1-6P	snRNA	143
chr1	15760000	16560000	chr1	16548651	16552531	ENSG00000225710	1	-1	PDE4DIPP8	unprocessed_pseudogene	3880
chr1	15760000	16560000	chr1	15756607	15786594	ENSG00000162458	13	1	FBLIM1	protein_coding	26594
chr1	15760000	16560000	chr1	15834474	15848147	ENSG00000179743	4	-1	SPEN-AS1	lncRNA	13673
chr1	15760000	16560000	chr1	15941869	15976132	ENSG00000116809	12	-1	ZBTB17	protein_coding	34263
chr1	15760000	16560000	chr1	16004236	16008807	ENSG00000183888	4	1	SRARP	protein_coding	4571
chr1	15760000	16560000	chr1	16018875	16034050	ENSG00000186510	12	1	CLCNKA	protein_coding	15175
chr1	15760000	16560000	chr1	16035178	16040029	ENSG00000232456	1	-1	FAM131C2P	unprocessed_pseudogene	4851
chr1	15760000	16560000	chr1	16057769	16073651	ENSG00000185519	9	-1	FAM131C	protein_coding	15882
chr1	15760000	16560000	chr1	16040252	16057311	ENSG00000184908	20	1	CLCNKB	protein_coding	17059
chr1	15760000	16560000	chr1	16124337	16156069	ENSG00000142627	13	-1	EPHA2	protein_coding	31732
chr1	15760000	16560000	chr1	16197854	16212652	ENSG00000142632	17	-1	ARHGEF19	protein_coding	14798
chr1	15760000	16560000	chr1	16231692	16237183	ENSG00000132881	12	-1	CPLANE2	protein_coding	5491
chr1	15760000	16560000	chr1	16216469	16228027	ENSG00000237276	10	-1	ANO7L1	transcribed_unprocessed_pseudogene	11558
chr1	15760000	16560000	chr1	16460948	16468481	ENSG00000226029	1	1	LINC01772	lncRNA	7533
chr1	15760000	16560000	chr1	16387117	16437424	ENSG00000187144	11	-1	SPATA21	protein_coding	50307
chr1	15760000	16560000	chr1	16474396	16491307	ENSG00000080947	16	-1	CROCCP3	transcribed_unprocessed_pseudogene	16911
chr1	15760000	16560000	chr1	16440721	16460078	ENSG00000157191	20	1	NECAP2	protein_coding	19357
chr1	15760000	16560000	chr1	16467436	16499257	ENSG00000290842	1	-1	CROCCP3	lncRNA	31821
chr1	15760000	16560000	chr1	16246840	16352480	ENSG00000037637	11	-1	FBXO42	protein_coding	105640
chr1	15760000	16560000	chr1	16352575	16398145	ENSG00000055070	17	1	SZRD1	protein_coding	45570
chr1	15760000	16560000	chr1	15989871	15994751	ENSG00000224966	4	1	TBC1D3P6	unprocessed_pseudogene	4880
chr1	15760000	16560000	chr1	16514645	16515754	ENSG00000261135	1	1		lncRNA	1109
chr1	15760000	16560000	chr1	16515034	16521788	ENSG00000285853	1	1		lncRNA	6754
chr1	15760000	16560000	chr1	15836095	15940456	ENSG00000065526	13	1	SPEN	protein_coding	104361
chr1	22960000	23760000	chr1	23010834	23019100	ENSG00000227868	7	-1	TEX46	protein_coding	8266
chr1	22960000	23760000	chr1	23044305	23044372	ENSG00000263793	1	1	MIR3115	miRNA	67
chr1	22960000	23760000	chr1	23057858	23057934	ENSG00000266802	1	-1		miRNA	76
chr1	22960000	23760000	chr1	23140325	23141142	ENSG00000229010	1	1		processed_pseudogene	817
chr1	22960000	23760000	chr1	23162704	23162810	ENSG00000206935	1	1	RNU6-514P	snRNA	106
chr1	22960000	23760000	chr1	23163953	23164053	ENSG00000252578	1	1	RNU6-135P	snRNA	100
chr1	22960000	23760000	chr1	23167098	23167889	ENSG00000289014	1	-1		lncRNA	791
chr1	22960000	23760000	chr1	23244765	23245224	ENSG00000215381	3	1	RPL29P6	processed_pseudogene	459
chr1	22960000	23760000	chr1	23370254	23370346	ENSG00000201405	1	1	Y_RNA	misc_RNA	92
chr1	22960000	23760000	chr1	23378380	23379029	ENSG00000271420	1	-1		lncRNA	649
chr1	22960000	23760000	chr1	23368939	23371839	ENSG00000249087	9	1	ZNF436-AS1	lncRNA	2900
chr1	22960000	23760000	chr1	23410832	23412146	ENSG00000232482	2	1		processed_pseudogene	1314
chr1	22960000	23760000	chr1	23549139	23550915	ENSG00000235052	1	-1		lncRNA	1776
chr1	22960000	23760000	chr1	23557926	23559501	ENSG00000117318	9	-1	ID3	protein_coding	1575
chr1	22960000	23760000	chr1	23691742	23696835	ENSG00000142676	14	1	RPL11	protein_coding	5093
chr1	22960000	23760000	chr1	22953043	22972866	ENSG00000215906	9	-1	LACTBL1	protein_coding	12866
chr1	22960000	23760000	chr1	23084030	23177808	ENSG00000169641	15	-1	LUZP1	protein_coding	93778
chr1	22960000	23760000	chr1	23281307	23287488	ENSG00000261326	4	-1	LINC01355	lncRNA	6181
chr1	22960000	23760000	chr1	23297797	23302866	ENSG00000284726	1	1		lncRNA	5069
chr1	22960000	23760000	chr1	23359448	23369836	ENSG00000125945	15	-1	ZNF436	protein_coding	10388
chr1	22960000	23760000	chr1	23380909	23424748	ENSG00000204219	11	-1	TCEA3	protein_coding	43839
chr1	22960000	23760000	chr1	23506438	23531233	ENSG00000007968	7	-1	E2F2	protein_coding	24795
chr1	22960000	23760000	chr1	23670294	23680259	ENSG00000229239	2	1	EEF1A1P48	unprocessed_pseudogene	9965
chr1	22960000	23760000	chr1	23743448	23762059	ENSG00000011007	13	1	ELOA	protein_coding	16552
chr1	22960000	23760000	chr1	23576436	23593621	ENSG00000285802	1	-1		lncRNA	17185
chr1	22960000	23760000	chr1	23428563	23484568	ENSG00000088280	20	-1	ASAP3	protein_coding	56005
chr1	22960000	23760000	chr1	23581495	23640568	ENSG00000197880	10	1	MDS2	lncRNA	59073
chr1	22960000	23760000	chr1	23706901	23778325	ENSG00000236810	8	-1	ELOA-AS1	lncRNA	53099
chr1	22960000	23760000	chr1	23303771	23344336	ENSG00000125944	21	-1	HNRNPR	protein_coding	40565
chr1	22960000	23760000	chr1	23191895	23217502	ENSG00000179546	5	-1	HTR1D	protein_coding	25607
chr1	22960000	23760000	chr1	23020147	23088058	ENSG00000240553	1	-1		lncRNA	67911
chr1	22960000	23760000	chr1	23019443	23083689	ENSG00000004487	18	1	KDM1A	protein_coding	64246
chr1	26920000	27680000	chr1	26980165	26980975	ENSG00000172746	6	1	RPL12P13	unprocessed_pseudogene	810
chr1	26920000	27680000	chr1	26983628	26984024	ENSG00000224064	1	1	RPL32P6	processed_pseudogene	396
chr1	26920000	27680000	chr1	26985897	26986340	ENSG00000225294	1	-1	OSTCP2	processed_pseudogene	443
chr1	26920000	27680000	chr1	27005020	27012850	ENSG00000158246	8	-1	TENT5B	protein_coding	7830
chr1	26920000	27680000	chr1	27176751	27177277	ENSG00000229985	2	1		processed_pseudogene	526
chr1	26920000	27680000	chr1	27200834	27201473	ENSG00000214973	3	-1	CHCHD3P3	processed_pseudogene	639
chr1	26920000	27680000	chr1	27206930	27207796	ENSG00000225159	1	1	NPM1P39	processed_pseudogene	866
chr1	26920000	27680000	chr1	27211265	27211484	ENSG00000225990	2	1	SNRPEP7	processed_pseudogene	219
chr1	26920000	27680000	chr1	27255464	27255567	ENSG00000252098	1	-1	Y_RNA	misc_RNA	103
chr1	26920000	27680000	chr1	27311240	27311838	ENSG00000243659	1	1		processed_pseudogene	598
chr1	26920000	27680000	chr1	27325219	27325325	ENSG00000206888	1	1	RNU6-48P	snRNA	106
chr1	26920000	27680000	chr1	27325329	27325796	ENSG00000241547	1	1	ACTG1P20	processed_pseudogene	467
chr1	26920000	27680000	chr1	27369110	27374824	ENSG00000142748	14	-1	FCN3	protein_coding	5714
chr1	26920000	27680000	chr1	27379176	27383333	ENSG00000174950	11	-1	CD164L2	protein_coding	4157
chr1	26920000	27680000	chr1	27389468	27390145	ENSG00000231207	1	1		processed_pseudogene	677
chr1	26920000	27680000	chr1	27457198	27459582	ENSG00000241169	1	1		lncRNA	2384
chr1	26920000	27680000	chr1	27525805	27530561	ENSG00000237429	1	1		lncRNA	4756
chr1	26920000	27680000	chr1	27649419	27649610	ENSG00000235912	1	1		processed_pseudogene	191
chr1	26920000	27680000	chr1	27660328	27666279	ENSG00000233975	2	-1	LINC02574	lncRNA	5951
chr1	26920000	27680000	chr1	27666064	27672212	ENSG00000126709	16	-1	IFI6	protein_coding	6148
chr1	26920000	27680000	chr1	27675603	27675709	ENSG00000206767	1	-1	RNU6-949P	snRNA	106
chr1	26920000	27680000	chr1	26900238	26946871	ENSG00000090273	14	1	NUDC	protein_coding	26871
chr1	26920000	27680000	chr1	26949562	26960468	ENSG00000175707	10	-1	KDF1	protein_coding	10906
chr1	26920000	27680000	chr1	27229106	27234352	ENSG00000224311	1	-1	WDTC1-DT	lncRNA	5246
chr1	26920000	27680000	chr1	27322145	27336400	ENSG00000186501	15	1	TMEM222	protein_coding	14255
chr1	26920000	27680000	chr1	27342020	27353937	ENSG00000142765	18	1	SYTL1	protein_coding	11917
chr1	26920000	27680000	chr1	27355184	27366961	ENSG00000142733	18	-1	MAP3K6	protein_coding	11777
chr1	26920000	27680000	chr1	27404230	27490167	ENSG00000158195	11	-1	WASF2	protein_coding	85937
chr1	26920000	27680000	chr1	27534035	27604431	ENSG00000126705	15	-1	AHDC1	protein_coding	70396
chr1	26920000	27680000	chr1	27612064	27635185	ENSG00000000938	13	-1	FGR	protein_coding	23121
chr1	26920000	27680000	chr1	27669468	27703063	ENSG00000225886	3	1		lncRNA	10532
chr1	26920000	27680000	chr1	27098809	27166981	ENSG00000090020	11	-1	SLC9A1	protein_coding	68172
chr1	26920000	27680000	chr1	26993692	27000886	ENSG00000253368	4	1	TRNP1	protein_coding	7194
chr1	26920000	27680000	chr1	27392622	27395814	ENSG00000181773	7	1	GPR3	protein_coding	3192
chr1	26920000	27680000	chr1	27234632	27308636	ENSG00000142784	16	1	WDTC1	protein_coding	74004
chr1	32400000	32840000	chr1	32402109	32403115	ENSG00000224333	1	-1	GAPDHP20	processed_pseudogene	1006
chr1	32400000	32840000	chr1	32421979	32422319	ENSG00000270850	1	1		processed_pseudogene	340
chr1	32400000	32840000	chr1	32457835	32458135	ENSG00000263529	2	1	RN7SL122P	misc_RNA	300
chr1	32400000	32840000	chr1	32639951	32640052	ENSG00000200591	1	1	Y_RNA	misc_RNA	101
chr1	32400000	32840000	chr1	32465072	32496686	ENSG00000273274	2	1	ZBTB8B	protein_coding	31614
chr1	32400000	32840000	chr1	32423214	32426789	ENSG00000229259	1	-1	LRRC37A12P	unprocessed_pseudogene	3575
chr1	32400000	32840000	chr1	32539427	32605941	ENSG00000160062	15	1	ZBTB8A	protein_coding	66514
chr1	32400000	32840000	chr1	32651142	32686211	ENSG00000162521	19	1	RBBP4	protein_coding	35069
chr1	32400000	32840000	chr1	32679906	32703596	ENSG00000162520	15	-1	SYNC	protein_coding	23690
chr1	32400000	32840000	chr1	32717734	32725237	ENSG00000224409	1	-1		lncRNA	7503
chr1	32400000	32840000	chr1	32816767	32858875	ENSG00000116497	18	1	S100PBP	protein_coding	23233
chr1	32400000	32840000	chr1	32775237	32818031	ENSG00000134684	13	-1	YARS1	protein_coding	42794
chr1	32400000	32840000	chr1	32741830	32774970	ENSG00000162522	11	1	KIAA1522	protein_coding	33140
chr1	32400000	32840000	chr1	32600172	32650903	ENSG00000176261	16	-1	ZBTB8OS	protein_coding	50731
chr1	32400000	32840000	chr1	32465057	32600792	ENSG00000254553	1	1		protein_coding	135735
chr1	33120000	34760000	chr1	33141871	33143230	ENSG00000278997	1	-1		TEC	1359
chr1	33120000	34760000	chr1	33162851	33166298	ENSG00000279179	1	1		TEC	3447
chr1	33120000	34760000	chr1	33194788	33200353	ENSG00000284721	1	1		lncRNA	5565
chr1	33120000	34760000	chr1	33261212	33261680	ENSG00000270115	1	1		lncRNA	468
chr1	33120000	34760000	chr1	33332393	33332492	ENSG00000284154	1	-1	MIR3605	miRNA	99
chr1	33120000	34760000	chr1	33336566	33336864	ENSG00000222112	1	-1	RN7SKP16	misc_RNA	298
chr1	33120000	34760000	chr1	33466249	33468954	ENSG00000234512	1	1	TLR12P	unitary_pseudogene	2705
chr1	33120000	34760000	chr1	33512008	33512743	ENSG00000235907	2	-1		processed_pseudogene	735
chr1	33120000	34760000	chr1	33838523	33840140	ENSG00000227000	2	1	HSPD1P14	processed_pseudogene	1617
chr1	33120000	34760000	chr1	33860475	33864791	ENSG00000176256	11	1	HMGB4	protein_coding	4316
chr1	33120000	34760000	chr1	34112949	34113063	ENSG00000201148	1	1	RNA5SP42	rRNA_pseudogene	114
chr1	33120000	34760000	chr1	34276859	34277292	ENSG00000270241	1	-1		processed_pseudogene	433
chr1	33120000	34760000	chr1	34669599	34669694	ENSG00000207941	1	-1	MIR552	miRNA	95
chr1	33120000	34760000	chr1	34755047	34758512	ENSG00000189280	3	1	GJB5	protein_coding	3465
chr1	33120000	34760000	chr1	34759740	34762327	ENSG00000189433	7	1	GJB4	protein_coding	260
chr1	33120000	34760000	chr1	33081104	33123492	ENSG00000142920	18	1	AZIN2	protein_coding	3492
chr1	33120000	34760000	chr1	33306766	33321098	ENSG00000184389	9	-1	A3GALT2	protein_coding	14332
chr1	33120000	34760000	chr1	33307348	33349245	ENSG00000225313	5	1		lncRNA	41897
chr1	33120000	34760000	chr1	33350352	33363245	ENSG00000233246	1	1	PHC2-AS1	lncRNA	12893
chr1	33120000	34760000	chr1	33472645	33501643	ENSG00000121903	15	1	ZSCAN20	protein_coding	28998
chr1	33120000	34760000	chr1	33868953	33893726	ENSG00000231163	6	1	CSMD2-AS1	lncRNA	24773
chr1	33120000	34760000	chr1	34640157	34685732	ENSG00000287703	1	-1		lncRNA	45575
chr1	33120000	34760000	chr1	33145399	33182059	ENSG00000116525	14	-1	TRIM62	protein_coding	36660
chr1	33120000	34760000	chr1	33256492	33300719	ENSG00000160094	15	1	ZNF362	protein_coding	44227
chr1	33120000	34760000	chr1	33323623	33431095	ENSG00000134686	21	-1	PHC2	protein_coding	107472
chr1	33120000	34760000	chr1	34166883	34219131	ENSG00000142698	15	1	C1orf94	protein_coding	52248
chr1	33120000	34760000	chr1	34712737	34859755	ENSG00000163866	9	-1	SMIM12	protein_coding	47263
chr1	33120000	34760000	chr1	33513998	34165842	ENSG00000121904	19	-1	CSMD2	protein_coding	651844
chr1	39080000	39760000	chr1	39120940	39121043	ENSG00000206654	1	-1	RNU6-608P	snRNA	103
chr1	39080000	39760000	chr1	39154164	39154296	ENSG00000222378	1	-1	RNA5SP44	rRNA_pseudogene	132
chr1	39080000	39760000	chr1	39226670	39238620	ENSG00000287422	1	-1		lncRNA	11950
chr1	39080000	39760000	chr1	39304294	39304898	ENSG00000217897	2	-1	HSPE1P8	processed_pseudogene	604
chr1	39080000	39760000	chr1	39514956	39516490	ENSG00000237624	1	1	OXCT2P1	unprocessed_pseudogene	1534
chr1	39080000	39760000	chr1	39567374	39567508	ENSG00000201457	1	-1	SNORA55	snoRNA	134
chr1	39080000	39760000	chr1	39633416	39633903	ENSG00000225903	1	1		lncRNA	487
chr1	39080000	39760000	chr1	39718028	39718595	ENSG00000225333	6	1		processed_pseudogene	567
chr1	39080000	39760000	chr1	39723566	39723627	ENSG00000252413	1	-1	RNU7-121P	snRNA	61
chr1	39080000	39760000	chr1	39733327	39735732	ENSG00000289711	1	1		transcribed_unprocessed_pseudogene	2405
chr1	39080000	39760000	chr1	39249838	39257649	ENSG00000226438	1	-1		lncRNA	7811
chr1	39080000	39760000	chr1	39491636	39529869	ENSG00000183682	8	1	BMP8A	protein_coding	38233
chr1	39080000	39760000	chr1	39565052	39573860	ENSG00000228060	3	1	PABPC4-AS1	lncRNA	8808
chr1	39080000	39760000	chr1	39560709	39576790	ENSG00000090621	15	-1	PABPC4	protein_coding	16081
chr1	39080000	39760000	chr1	39531838	39558707	ENSG00000243970	6	-1	PPIEL	transcribed_unprocessed_pseudogene	26869
chr1	39080000	39760000	chr1	39522280	39559698	ENSG00000291129	1	-1	PPIEL	lncRNA	37418
chr1	39080000	39760000	chr1	39623435	39639643	ENSG00000163909	8	-1	HEYL	protein_coding	16208
chr1	39080000	39760000	chr1	39678648	39691485	ENSG00000116983	13	-1	HPCAL4	protein_coding	12837
chr1	39080000	39760000	chr1	39651229	39672107	ENSG00000116981	4	-1	NT5C1A	protein_coding	20878
chr1	39080000	39760000	chr1	39757182	39788865	ENSG00000116985	12	-1	BMP8B	protein_coding	2818
chr1	39080000	39760000	chr1	39081316	39487177	ENSG00000127603	32	1	MACF1	protein_coding	405861
chr1	39080000	39760000	chr1	39692182	39763914	ENSG00000084072	17	1	PPIE	protein_coding	67818
chr1	42760000	43120000	chr1	42775813	42776790	ENSG00000228452	1	-1	C1orf50-AS1	lncRNA	977
chr1	42760000	43120000	chr1	42846573	42852477	ENSG00000164011	18	1	ZNF691	protein_coding	5904
chr1	42760000	43120000	chr1	42886597	42888767	ENSG00000233708	1	-1		processed_pseudogene	2170
chr1	42760000	43120000	chr1	42891094	42892430	ENSG00000237090	1	-1	MKRN8P	processed_pseudogene	1336
chr1	42760000	43120000	chr1	42903232	42903912	ENSG00000225099	1	1	ATP6V1E1P1	processed_pseudogene	680
chr1	42760000	43120000	chr1	42924460	42925849	ENSG00000288955	1	1		lncRNA	1389
chr1	42760000	43120000	chr1	42952202	42952641	ENSG00000284138	1	-1	ATP6V0CP4	processed_pseudogene	439
chr1	42760000	43120000	chr1	42959065	42961864	ENSG00000283973	2	-1		lncRNA	2799
chr1	42760000	43120000	chr1	42991438	42991544	ENSG00000207256	1	1	RNU6-880P	snRNA	106
chr1	42760000	43120000	chr1	43023549	43023637	ENSG00000283136	1	-1	U6	snRNA	88
chr1	42760000	43120000	chr1	43104086	43104497	ENSG00000277513	1	1		processed_pseudogene	411
chr1	42760000	43120000	chr1	42817122	42844991	ENSG00000164010	15	1	ERMAP	protein_coding	27869
chr1	42760000	43120000	chr1	42746335	42767084	ENSG00000117385	16	-1	P3H1	protein_coding	7084
chr1	42760000	43120000	chr1	42784991	42816619	ENSG00000274386	6	1	TMEM269	protein_coding	31628
chr1	42760000	43120000	chr1	42807052	42817397	ENSG00000177868	12	-1	SVBP	protein_coding	10345
chr1	42760000	43120000	chr1	42767292	42794493	ENSG00000283580	4	1		protein_coding	27201
chr1	42760000	43120000	chr1	42767245	42779491	ENSG00000164008	17	1	C1orf50	protein_coding	12246
chr1	42760000	43120000	chr1	42832522	42846427	ENSG00000228192	10	-1	ZNF691-DT	lncRNA	13905
chr1	42760000	43120000	chr1	42925353	42958893	ENSG00000117394	24	-1	SLC2A1	protein_coding	33540
chr1	42760000	43120000	chr1	42959049	42996814	ENSG00000227533	7	1	SLC2A1-DT	lncRNA	37765
chr1	66240000	67520000	chr1	66628440	66628517	ENSG00000264720	3	1	MIR3117	miRNA	77
chr1	66240000	67520000	chr1	66797740	66801276	ENSG00000172410	5	-1	INSL5	protein_coding	3536
chr1	66240000	67520000	chr1	66826942	66828558	ENSG00000231080	1	1		lncRNA	1616
chr1	66240000	67520000	chr1	66925327	66926027	ENSG00000289394	1	1		lncRNA	700
chr1	66240000	67520000	chr1	67102645	67102779	ENSG00000252433	1	-1		snoRNA	134
chr1	66240000	67520000	chr1	67121605	67123956	ENSG00000275678	1	-1		lncRNA	2351
chr1	66240000	67520000	chr1	67196140	67196243	ENSG00000253074	1	1	RNU6-586P	snRNA	103
chr1	66240000	67520000	chr1	67267601	67267726	ENSG00000252116	1	-1	RNU4ATAC4P	snRNA	125
chr1	66240000	67520000	chr1	67278052	67278779	ENSG00000228523	1	1	DNAJB6P4	processed_pseudogene	727
chr1	66240000	67520000	chr1	67417214	67417318	ENSG00000223263	1	1	RNU6-387P	snRNA	104
chr1	66240000	67520000	chr1	66665864	66677027	ENSG00000248458	2	-1		lncRNA	11163
chr1	66240000	67520000	chr1	66752459	66779047	ENSG00000152760	10	1	DYNLT5	protein_coding	26588
chr1	66240000	67520000	chr1	66999350	67054148	ENSG00000116704	8	-1	SLC35D1	protein_coding	54798
chr1	66240000	67520000	chr1	67407810	67430415	ENSG00000142864	15	-1	SERBP1	protein_coding	22605
chr1	66240000	67520000	chr1	66924895	66988619	ENSG00000198160	15	1	MIER1	protein_coding	63724
chr1	66240000	67520000	chr1	66812885	66924856	ENSG00000152763	17	-1	DNAI4	protein_coding	111971
chr1	66240000	67520000	chr1	66533267	66751139	ENSG00000118473	23	1	SGIP1	protein_coding	217872
chr1	66240000	67520000	chr1	67307364	67398724	ENSG00000081985	14	1	IL12RB2	protein_coding	91360
chr1	66240000	67520000	chr1	67138907	67259979	ENSG00000162594	17	1	IL23R	protein_coding	121072
chr1	66240000	67520000	chr1	65792514	66374579	ENSG00000184588	18	1	PDE4B	protein_coding	134579
chr1	66240000	67520000	chr1	67092165	67231853	ENSG00000203963	12	-1	C1orf141	protein_coding	139688
chr1	67520000	68440000	chr1	67522299	67532612	ENSG00000235200	5	1	LINC01702	lncRNA	10313
chr1	67520000	68440000	chr1	67541127	67541233	ENSG00000207504	1	1	RNU6-1031P	snRNA	106
chr1	67520000	68440000	chr1	67561073	67561446	ENSG00000238139	2	1		processed_pseudogene	373
chr1	67520000	68440000	chr1	67660155	67661013	ENSG00000232048	2	-1	HNRNPCP9	processed_pseudogene	858
chr1	67520000	68440000	chr1	67656831	67657129	ENSG00000242482	3	-1	RN7SL392P	misc_RNA	298
chr1	67520000	68440000	chr1	67685201	67688334	ENSG00000116717	13	1	GADD45A	protein_coding	3133
chr1	67520000	68440000	chr1	67772593	67772653	ENSG00000238778	1	-1	RNU7-80P	snRNA	60
chr1	67520000	68440000	chr1	68043330	68044233	ENSG00000235055	3	1		processed_pseudogene	903
chr1	67520000	68440000	chr1	68049360	68049745	ENSG00000228431	1	-1	ARL5AP3	processed_pseudogene	385
chr1	67520000	68440000	chr1	68045886	68051717	ENSG00000162595	8	-1	DIRAS3	protein_coding	5831
chr1	67520000	68440000	chr1	68161761	68163090	ENSG00000234383	1	-1	CTBP2P8	processed_pseudogene	1329
chr1	67520000	68440000	chr1	68183518	68183610	ENSG00000221203	1	-1	MIR1262	miRNA	92
chr1	67520000	68440000	chr1	68242474	68243055	ENSG00000229133	1	-1	RPS7P4	processed_pseudogene	581
chr1	67520000	68440000	chr1	68282388	68282622	ENSG00000225242	2	1	COX6B1P7	processed_pseudogene	234
chr1	67520000	68440000	chr1	68375327	68375663	ENSG00000237622	1	-1	ELOCP18	processed_pseudogene	336
chr1	67520000	68440000	chr1	68381441	68381657	ENSG00000229440	1	-1		processed_pseudogene	216
chr1	67520000	68440000	chr1	68428822	68449954	ENSG00000116745	7	-1	RPE65	protein_coding	11178
chr1	67520000	68440000	chr1	67701475	67833467	ENSG00000172380	6	-1	GNG12	protein_coding	131992
chr1	67520000	68440000	chr1	68098473	68233120	ENSG00000116729	14	-1	WLS	protein_coding	134647
chr1	67520000	68440000	chr1	67832293	68202987	ENSG00000232284	9	1	GNG12-AS1	lncRNA	370694
chr1	83880000	85280000	chr1	83979118	83984300	ENSG00000233061	1	-1	TTLL7-IT1	lncRNA	5182
chr1	83880000	85280000	chr1	84076331	84077961	ENSG00000271576	2	-1	PRKACB-DT	lncRNA	1630
chr1	83880000	85280000	chr1	84085741	84086233	ENSG00000213540	3	1	TXN2P1	processed_pseudogene	492
chr1	83880000	85280000	chr1	84244334	84244577	ENSG00000226970	2	1	NEDD8P1	processed_pseudogene	243
chr1	83880000	85280000	chr1	84277321	84277457	ENSG00000199959	1	1		snoRNA	136
chr1	83880000	85280000	chr1	84477039	84479157	ENSG00000285361	1	1		lncRNA	2118
chr1	83880000	85280000	chr1	84498323	84506581	ENSG00000174021	12	-1	GNG5	protein_coding	8258
chr1	83880000	85280000	chr1	84607099	84610697	ENSG00000285374	1	1		lncRNA	3598
chr1	83880000	85280000	chr1	84614068	84621061	ENSG00000289881	1	-1		lncRNA	6993
chr1	83880000	85280000	chr1	84628230	84635020	ENSG00000180869	4	-1	LINC01555	lncRNA	6790
chr1	83880000	85280000	chr1	84636158	84637106	ENSG00000232622	1	-1		processed_pseudogene	948
chr1	83880000	85280000	chr1	84785427	84786714	ENSG00000285325	1	1		lncRNA	1287
chr1	83880000	85280000	chr1	85133794	85133873	ENSG00000266110	1	1	MIR4423	miRNA	79
chr1	83880000	85280000	chr1	85152487	85154203	ENSG00000280099	1	-1		TEC	1716
chr1	83880000	85280000	chr1	85249953	85259672	ENSG00000162642	14	-1	C1orf52	protein_coding	9719
chr1	83880000	85280000	chr1	85264296	85264402	ENSG00000223254	1	1	Y_RNA	misc_RNA	106
chr1	83880000	85280000	chr1	85265776	85276632	ENSG00000142867	14	-1	BCL10	protein_coding	10856
chr1	83880000	85280000	chr1	84038529	84065031	ENSG00000285201	1	1		lncRNA	26502
chr1	83880000	85280000	chr1	84298366	84389957	ENSG00000203943	9	1	SAMD13	protein_coding	91591
chr1	83880000	85280000	chr1	84344678	84349939	ENSG00000249237	5	1		transcribed_unitary_pseudogene	5261
chr1	83880000	85280000	chr1	84363706	84397831	ENSG00000240520	7	-1	UOX	transcribed_unitary_pseudogene	34125
chr1	83880000	85280000	chr1	84479259	84498352	ENSG00000117133	11	1	RPF1	protein_coding	19093
chr1	83880000	85280000	chr1	84549611	84574480	ENSG00000117151	13	-1	CTBS	protein_coding	24869
chr1	83880000	85280000	chr1	84574114	84583620	ENSG00000284882	2	1		lncRNA	9506
chr1	83880000	85280000	chr1	84811602	84893206	ENSG00000171517	6	-1	LPAR3	protein_coding	81604
chr1	83880000	85280000	chr1	85018082	85048500	ENSG00000055732	13	-1	MCOLN3	protein_coding	30418
chr1	83880000	85280000	chr1	84398484	84415018	ENSG00000137976	8	1	DNASE2B	protein_coding	16534
chr1	83880000	85280000	chr1	84498350	84556688	ENSG00000285851	1	-1		lncRNA	58338
chr1	83880000	85280000	chr1	84643706	84690803	ENSG00000117155	17	-1	SSX2IP	protein_coding	47097
chr1	83880000	85280000	chr1	84506300	84567379	ENSG00000122432	19	1	SPATA1	protein_coding	61079
chr1	83880000	85280000	chr1	84015865	84018371	ENSG00000229486	2	-1		processed_pseudogene	2506
chr1	83880000	85280000	chr1	84078062	84238498	ENSG00000142875	21	1	PRKACB	protein_coding	160436
chr1	83880000	85280000	chr1	85276388	85448124	ENSG00000223653	6	1	BCL10-AS1	lncRNA	3612
chr1	83880000	85280000	chr1	84999147	85133138	ENSG00000162643	13	1	DNAI3	protein_coding	133991
chr1	83880000	85280000	chr1	85156889	85201724	ENSG00000097096	10	-1	SYDE2	protein_coding	44835
chr1	83880000	85280000	chr1	84925583	84997113	ENSG00000153898	13	-1	MCOLN2	protein_coding	71530
chr1	83880000	85280000	chr1	83865024	83999150	ENSG00000137941	17	-1	TTLL7	protein_coding	119150
chr1	93920000	94480000	chr1	93927714	93928302	ENSG00000226960	1	-1	MTCO1P21	unprocessed_pseudogene	588
chr1	93920000	94480000	chr1	93922574	93923945	ENSG00000234099	1	-1	MTND4P11	unprocessed_pseudogene	1371
chr1	93920000	94480000	chr1	93924743	93925385	ENSG00000232752	1	-1	MTCO3P21	unprocessed_pseudogene	642
chr1	93920000	94480000	chr1	93924386	93924716	ENSG00000235794	1	-1	MTND3P21	unprocessed_pseudogene	330
chr1	93920000	94480000	chr1	93925406	93926072	ENSG00000229842	2	-1	MTATP6P13	unprocessed_pseudogene	666
chr1	93920000	94480000	chr1	93926032	93926188	ENSG00000250890	1	-1		unprocessed_pseudogene	156
chr1	93920000	94480000	chr1	93926615	93927569	ENSG00000236689	1	-1	MTCO2P21	unprocessed_pseudogene	954
chr1	93920000	94480000	chr1	93921268	93921667	ENSG00000223490	2	-1	CHCHD2P5	processed_pseudogene	399
chr1	93920000	94480000	chr1	93934479	93935244	ENSG00000233129	1	-1		processed_pseudogene	765
chr1	93920000	94480000	chr1	94145111	94145619	ENSG00000233482	1	1		lncRNA	508
chr1	93920000	94480000	chr1	94150738	94151080	ENSG00000264963	2	1	RN7SL440P	misc_RNA	342
chr1	93920000	94480000	chr1	94302038	94303022	ENSG00000178596	10	1	GAPDHP29	processed_pseudogene	984
chr1	93920000	94480000	chr1	94417743	94418228	ENSG00000286692	1	-1		lncRNA	485
chr1	93920000	94480000	chr1	94406395	94406882	ENSG00000232918	2	-1	RPL21P26	processed_pseudogene	487
chr1	93920000	94480000	chr1	94318479	94324569	ENSG00000236098	1	-1		lncRNA	6090
chr1	93920000	94480000	chr1	94148988	94275068	ENSG00000137962	13	-1	ARHGAP29	protein_coding	126080
chr1	93920000	94480000	chr1	93992834	94121148	ENSG00000198691	14	-1	ABCA4	protein_coding	128314
chr1	93920000	94480000	chr1	94418389	94518666	ENSG00000117528	14	1	ABCD3	protein_coding	61611
chr1	93920000	94480000	chr1	94247819	94411036	ENSG00000226835	4	1	ARHGAP29-AS1	lncRNA	163217
chr1	155200000	156600000	chr1	155194996	155205495	ENSG00000231064	9	1	THBS3-AS1	lncRNA	5495
chr1	155200000	156600000	chr1	155211151	155213819	ENSG00000236263	1	-1		lncRNA	2668
chr1	155200000	156600000	chr1	155208695	155213824	ENSG00000173171	15	1	MTX1	protein_coding	5129
chr1	155200000	156600000	chr1	155214368	155218874	ENSG00000160766	17	-1	GBAP1	transcribed_unprocessed_pseudogene	4506
chr1	155200000	156600000	chr1	155230975	155234325	ENSG00000236675	1	1	MTX1P1	unprocessed_pseudogene	3350
chr1	155200000	156600000	chr1	155255979	155262430	ENSG00000116521	11	-1	SCAMP3	protein_coding	6451
chr1	155200000	156600000	chr1	155289293	155301438	ENSG00000143627	19	-1	PKLR	protein_coding	12145
chr1	155200000	156600000	chr1	155320894	155331114	ENSG00000160753	17	1	RUSC1	protein_coding	10220
chr1	155200000	156600000	chr1	155346350	155346445	ENSG00000283701	1	-1	MIR555	miRNA	95
chr1	155200000	156600000	chr1	155358712	155358818	ENSG00000207134	1	-1	RNU6-106P	snRNA	106
chr1	155200000	156600000	chr1	155396010	155396978	ENSG00000227773	1	-1	ASH1L-IT1	lncRNA	968
chr1	155200000	156600000	chr1	155419397	155419500	ENSG00000207144	1	1	RNU6-1297P	snRNA	103
chr1	155200000	156600000	chr1	155433178	155434262	ENSG00000237872	4	1	POU5F1P4	processed_pseudogene	1084
chr1	155200000	156600000	chr1	155562026	155563944	ENSG00000235919	5	1	ASH1L-AS1	lncRNA	1918
chr1	155200000	156600000	chr1	155590601	155591262	ENSG00000223503	1	-1		processed_pseudogene	661
chr1	155200000	156600000	chr1	155609776	155610380	ENSG00000232519	2	-1		lncRNA	604
chr1	155200000	156600000	chr1	155710098	155710563	ENSG00000227673	1	-1		lncRNA	465
chr1	155200000	156600000	chr1	155845367	155846624	ENSG00000234937	1	1		processed_pseudogene	1257
chr1	155200000	156600000	chr1	155894281	155894386	ENSG00000283442	1	1	U4	snRNA	105
chr1	155200000	156600000	chr1	155919909	155920045	ENSG00000207475	1	-1	SNORA80E	snoRNA	136
chr1	155200000	156600000	chr1	155925958	155926085	ENSG00000280466	1	-1	SCARNA4	scaRNA	127
chr1	155200000	156600000	chr1	155925958	155926086	ENSG00000281394	1	-1	SCARNA4	scaRNA	128
chr1	155200000	156600000	chr1	155951273	155951336	ENSG00000277817	1	-1	MIR6738	miRNA	63
chr1	155200000	156600000	chr1	155978799	155982986	ENSG00000273002	1	1	ARHGEF2-AS2	lncRNA	4187
chr1	155200000	156600000	chr1	156009048	156020951	ENSG00000163479	14	-1	SSR2	protein_coding	11903
chr1	155200000	156600000	chr1	156061160	156070504	ENSG00000132698	15	1	RAB25	protein_coding	9344
chr1	155200000	156600000	chr1	156192063	156192203	ENSG00000252236	1	-1		snoRNA	140
chr1	155200000	156600000	chr1	156242184	156243317	ENSG00000242252	2	1	BGLAP	protein_coding	1133
chr1	155200000	156600000	chr1	156243320	156248117	ENSG00000160781	17	-1	PAQR6	protein_coding	4797
chr1	155200000	156600000	chr1	156298624	156299307	ENSG00000189030	10	-1	VHLL	protein_coding	683
chr1	155200000	156600000	chr1	156290089	156295689	ENSG00000198715	13	-1	GLMP	protein_coding	5600
chr1	155200000	156600000	chr1	156337314	156346995	ENSG00000163467	12	1	TSACC	protein_coding	9681
chr1	155200000	156600000	chr1	156369211	156385219	ENSG00000132677	13	1	RHBG	protein_coding	16008
chr1	155200000	156600000	chr1	156388226	156395609	ENSG00000237390	1	1		lncRNA	7383
chr1	155200000	156600000	chr1	156420341	156420429	ENSG00000207933	3	-1	MIR9-1	miRNA	88
chr1	155200000	156600000	chr1	156484098	156484210	ENSG00000206651	1	-1	Y_RNA	misc_RNA	112
chr1	155200000	156600000	chr1	156509854	156511681	ENSG00000260460	1	1		lncRNA	1827
chr1	155200000	156600000	chr1	156503083	156504021	ENSG00000288835	1	1		lncRNA	938
chr1	155200000	156600000	chr1	156504660	156505091	ENSG00000289593	2	-1		lncRNA	431
chr1	155200000	156600000	chr1	155195588	155209051	ENSG00000169231	13	-1	THBS3	protein_coding	9051
chr1	155200000	156600000	chr1	155234452	155244699	ENSG00000177628	16	-1	GBA1	protein_coding	10247
chr1	155200000	156600000	chr1	155262868	155278491	ENSG00000176444	19	-1	CLK2	protein_coding	15623
chr1	155200000	156600000	chr1	155277463	155289848	ENSG00000143630	10	1	HCN3	protein_coding	12385
chr1	155200000	156600000	chr1	155213821	155227574	ENSG00000291137	1	-1	GBAP1	lncRNA	13753
chr1	155200000	156600000	chr1	155247205	155255483	ENSG00000160767	23	-1	ENTREP3	protein_coding	8278
chr1	155200000	156600000	chr1	155566050	155566306	ENSG00000271267	1	-1		processed_pseudogene	256
chr1	155200000	156600000	chr1	155586644	155602197	ENSG00000225082	2	1	DAP3P1	unprocessed_pseudogene	15553
chr1	155200000	156600000	chr1	155659443	155689000	ENSG00000163374	20	-1	YY1AP1	protein_coding	29557
chr1	155200000	156600000	chr1	155614726	155660245	ENSG00000246203	2	-1		unprocessed_pseudogene	45519
chr1	155200000	156600000	chr1	155626755	155637604	ENSG00000287839	2	-1		lncRNA	10849
chr1	155200000	156600000	chr1	155745829	155750137	ENSG00000203761	5	1	MSTO2P	unprocessed_pseudogene	4308
chr1	155200000	156600000	chr1	155859567	155885199	ENSG00000132718	9	1	SYT11	protein_coding	25632
chr1	155200000	156600000	chr1	155913045	155934413	ENSG00000132680	11	-1	KHDC4	protein_coding	21368
chr1	155200000	156600000	chr1	155941638	155943087	ENSG00000173080	6	1	RXFP4	protein_coding	1449
chr1	155200000	156600000	chr1	155897808	155911404	ENSG00000143622	12	-1	RIT1	protein_coding	13596
chr1	155200000	156600000	chr1	155991390	156001787	ENSG00000224276	1	1	ARHGEF2-AS1	lncRNA	10397
chr1	155200000	156600000	chr1	156001953	156033342	ENSG00000285677	2	1		lncRNA	31389
chr1	155200000	156600000	chr1	156035299	156053798	ENSG00000160803	8	-1	UBQLN4	protein_coding	18499
chr1	155200000	156600000	chr1	156072013	156082465	ENSG00000254726	3	-1	MEX3A	protein_coding	10452
chr1	155200000	156600000	chr1	156054782	156058506	ENSG00000116586	12	1	LAMTOR2	protein_coding	3724
chr1	155200000	156600000	chr1	156193932	156212796	ENSG00000160785	14	1	SLC25A44	protein_coding	18864
chr1	155200000	156600000	chr1	156147366	156177752	ENSG00000196189	14	1	SEMA4A	protein_coding	30386
chr1	155200000	156600000	chr1	156249224	156282825	ENSG00000198952	8	-1	SMG5	protein_coding	33601
chr1	155200000	156600000	chr1	156282935	156293185	ENSG00000163472	19	1	TMEM79	protein_coding	10250
chr1	155200000	156600000	chr1	156308968	156367873	ENSG00000163468	15	-1	CCT3	protein_coding	58905
chr1	155200000	156600000	chr1	156404250	156456763	ENSG00000125462	20	-1	MIR9-1HG	lncRNA	52513
chr1	155200000	156600000	chr1	156525405	156572604	ENSG00000183856	11	-1	IQGAP3	protein_coding	47199
chr1	155200000	156600000	chr1	156591756	156609507	ENSG00000163382	13	1	NAXE	protein_coding	8244
chr1	155200000	156600000	chr1	156579723	156587719	ENSG00000187862	13	1	TTC24	protein_coding	7996
chr1	155200000	156600000	chr1	156594301	156601496	ENSG00000160818	17	-1	GPATCH4	protein_coding	5699
chr1	155200000	156600000	chr1	155687960	155739010	ENSG00000132676	16	1	DAP3	protein_coding	51050
chr1	155200000	156600000	chr1	155316863	155324176	ENSG00000225855	7	-1	RUSC1-AS1	lncRNA	7313
chr1	155200000	156600000	chr1	155308748	155320666	ENSG00000160752	15	1	FDPS	protein_coding	11918
chr1	155200000	156600000	chr1	155335268	155563162	ENSG00000116539	14	-1	ASH1L	protein_coding	227894
chr1	155200000	156600000	chr1	155749659	155859400	ENSG00000116580	20	-1	GON4L	protein_coding	109741
chr1	155200000	156600000	chr1	155946851	156007070	ENSG00000116584	22	-1	ARHGEF2	protein_coding	60219
chr1	155200000	156600000	chr1	155563235	155614951	ENSG00000125459	18	1	MSTO1	protein_coding	51716
chr1	155200000	156600000	chr1	156082573	156140081	ENSG00000160789	24	1	LMNA	protein_coding	57508
chr1	155200000	156600000	chr1	156463727	156500779	ENSG00000116604	19	-1	MEF2D	protein_coding	37052
chr1	155200000	156600000	chr1	156212982	156243332	ENSG00000260238	6	1	PMF1-BGLAP	protein_coding	30350
chr1	155200000	156600000	chr1	156212993	156240042	ENSG00000160783	19	1	PMF1	protein_coding	27049
chr1	172440000	173240000	chr1	172613428	172613534	ENSG00000251943	1	-1	RNU6-693P	snRNA	106
chr1	172440000	173240000	chr1	172659103	172666876	ENSG00000117560	8	1	FASLG	protein_coding	7773
chr1	172440000	173240000	chr1	172748560	172749502	ENSG00000229785	1	1	SLC25A38P1	processed_pseudogene	942
chr1	172440000	173240000	chr1	172885947	172886258	ENSG00000227177	1	-1	AIMP1P2	processed_pseudogene	311
chr1	172440000	173240000	chr1	172906900	172907684	ENSG00000224000	1	1		lncRNA	784
chr1	172440000	173240000	chr1	173141100	173142350	ENSG00000230849	2	-1	GOT2P2	processed_pseudogene	1250
chr1	172440000	173240000	chr1	173174300	173175503	ENSG00000226375	1	-1		lncRNA	1203
chr1	172440000	173240000	chr1	172370189	172444086	ENSG00000135845	10	-1	PIGC	protein_coding	4086
chr1	172440000	173240000	chr1	172420685	172468831	ENSG00000180999	11	1	C1orf105	protein_coding	28831
chr1	172440000	173240000	chr1	172532349	172611833	ENSG00000094975	15	1	SUCO	protein_coding	79484
chr1	172440000	173240000	chr1	173039202	173050941	ENSG00000120337	10	-1	TNFSF18	protein_coding	11739
chr1	172440000	173240000	chr1	173183731	173207331	ENSG00000117586	11	-1	TNFSF4	protein_coding	23600
chr1	172440000	173240000	chr1	172752586	172752924	ENSG00000279061	1	1		TEC	338
chr1	172440000	173240000	chr1	172775905	173064015	ENSG00000224228	2	1		lncRNA	288110
chr2	62440000	63560000	chr2	62491178	62491468	ENSG00000241625	3	1	RN7SL18P	misc_RNA	290
chr2	62440000	63560000	chr2	62507545	62507823	ENSG00000233702	1	-1	RPL37P13	processed_pseudogene	278
chr2	62440000	63560000	chr2	62532583	62533059	ENSG00000229503	1	-1	RPL21P37	processed_pseudogene	476
chr2	62440000	63560000	chr2	62552463	62553434	ENSG00000232144	1	-1	PSAT1P2	processed_pseudogene	971
chr2	62440000	63560000	chr2	62561058	62561423	ENSG00000230595	1	-1	RSL24D1P2	processed_pseudogene	365
chr2	62440000	63560000	chr2	62726636	62726740	ENSG00000252436	1	-1	Y_RNA	misc_RNA	104
chr2	62440000	63560000	chr2	62817764	62819706	ENSG00000286524	1	-1		lncRNA	1942
chr2	62440000	63560000	chr2	62939916	62940282	ENSG00000237162	1	1	RPS20P9	processed_pseudogene	366
chr2	62440000	63560000	chr2	63050057	63057836	ENSG00000115507	10	1	OTX1	protein_coding	7779
chr2	62440000	63560000	chr2	63083008	63087322	ENSG00000270437	1	1		processed_pseudogene	4314
chr2	62440000	63560000	chr2	63108118	63108429	ENSG00000232403	1	-1	RPL27P5	processed_pseudogene	311
chr2	62440000	63560000	chr2	63117851	63119542	ENSG00000242412	1	-1	DBIL5P2	transcribed_processed_pseudogene	1691
chr2	62440000	63560000	chr2	63168600	63168847	ENSG00000283636	1	1	Metazoa_SRP	misc_RNA	247
chr2	62440000	63560000	chr2	63232453	63233577	ENSG00000233716	1	-1	MTFR2P1	processed_pseudogene	1124
chr2	62440000	63560000	chr2	63517892	63519268	ENSG00000279485	1	-1		TEC	1376
chr2	62440000	63560000	chr2	62500218	62511894	ENSG00000186889	10	-1	TMEM17	protein_coding	11676
chr2	62440000	63560000	chr2	62826064	62858438	ENSG00000226605	1	-1		lncRNA	32374
chr2	62440000	63560000	chr2	62296246	62464073	ENSG00000228541	3	1		lncRNA	24073
chr2	62440000	63560000	chr2	62533681	62662829	ENSG00000226622	7	-1		lncRNA	129148
chr2	62440000	63560000	chr2	63106879	63197037	ENSG00000286480	1	1		lncRNA	90158
chr2	62440000	63560000	chr2	63119559	63827843	ENSG00000143951	16	-1	WDPCP	protein_coding	440441
chr2	62440000	63560000	chr2	62957326	63048640	ENSG00000231609	7	-1	EHBP1-AS1	lncRNA	91314
chr2	62440000	63560000	chr2	62673851	63046487	ENSG00000115504	15	1	EHBP1	protein_coding	372636
chr2	64000000	65240000	chr2	64086353	64088246	ENSG00000228079	2	-1		lncRNA	1893
chr2	64000000	65240000	chr2	64208498	64208716	ENSG00000270354	1	-1		processed_pseudogene	218
chr2	64000000	65240000	chr2	64275361	64275503	ENSG00000290118	1	-1		lncRNA	142
chr2	64000000	65240000	chr2	64330481	64332801	ENSG00000238012	2	-1		lncRNA	2320
chr2	64000000	65240000	chr2	64340747	64340848	ENSG00000264297	2	-1	MIR4433B	miRNA	101
chr2	64000000	65240000	chr2	64340759	64340839	ENSG00000283222	1	1	MIR4433A	miRNA	80
chr2	64000000	65240000	chr2	64347193	64347741	ENSG00000236148	5	-1	RPL23AP37	processed_pseudogene	548
chr2	64000000	65240000	chr2	64450096	64450524	ENSG00000237217	1	1		processed_pseudogene	428
chr2	64000000	65240000	chr2	64525513	64525565	ENSG00000283204	1	1	MIR4434	miRNA	52
chr2	64000000	65240000	chr2	64522187	64524110	ENSG00000260101	2	-1	AFTPH-DT	lncRNA	1923
chr2	64000000	65240000	chr2	64578892	64578997	ENSG00000252414	1	1	RNU6-100P	snRNA	105
chr2	64000000	65240000	chr2	64606975	64616556	ENSG00000233694	6	1	LINC02579	lncRNA	9581
chr2	64000000	65240000	chr2	64644612	64646698	ENSG00000226756	1	1		lncRNA	2086
chr2	64000000	65240000	chr2	64665607	64666064	ENSG00000227791	3	1	RPS10P9	processed_pseudogene	457
chr2	64000000	65240000	chr2	64817378	64817675	ENSG00000275588	1	1	RN7SL341P	misc_RNA	297
chr2	64000000	65240000	chr2	64834056	64834157	ENSG00000199964	1	-1	Y_RNA	misc_RNA	101
chr2	64000000	65240000	chr2	64906863	64907138	ENSG00000244534	3	-1	RN7SL211P	misc_RNA	275
chr2	64000000	65240000	chr2	64960053	64960634	ENSG00000227394	1	-1	RPL11P1	processed_pseudogene	581
chr2	64000000	65240000	chr2	64994746	64994860	ENSG00000252892	1	1	RNU6-548P	snRNA	114
chr2	64000000	65240000	chr2	65158662	65158860	ENSG00000272025	1	1	SNORA74	snoRNA	198
chr2	64000000	65240000	chr2	65205108	65205988	ENSG00000172974	11	1	VDAC2P5	processed_pseudogene	880
chr2	64000000	65240000	chr2	64185078	64205485	ENSG00000230923	2	-1	LINC00309	lncRNA	20407
chr2	64000000	65240000	chr2	64338067	64341647	ENSG00000238201	1	-1		lncRNA	3580
chr2	64000000	65240000	chr2	64337103	64341709	ENSG00000289176	1	-1		lncRNA	4606
chr2	64000000	65240000	chr2	64273709	64291656	ENSG00000288932	2	1		lncRNA	17947
chr2	64000000	65240000	chr2	64395220	64453967	ENSG00000223935	3	-1	LGALSL-DT	lncRNA	58747
chr2	64000000	65240000	chr2	64453969	64461381	ENSG00000119862	13	1	LGALSL	protein_coding	7412
chr2	64000000	65240000	chr2	64524299	64593005	ENSG00000119844	17	1	AFTPH	protein_coding	68706
chr2	64000000	65240000	chr2	64765463	64767873	ENSG00000288986	1	-1		lncRNA	2410
chr2	64000000	65240000	chr2	64836985	64848264	ENSG00000287123	1	1		lncRNA	11279
chr2	64000000	65240000	chr2	64846130	64863626	ENSG00000234572	1	-1	LINC01800	lncRNA	17496
chr2	64000000	65240000	chr2	65030720	65053017	ENSG00000232613	7	1	LINC02576	lncRNA	22297
chr2	64000000	65240000	chr2	65070696	65130331	ENSG00000138069	18	-1	RAB1A	protein_coding	59635
chr2	64000000	65240000	chr2	65056354	65087004	ENSG00000011523	15	1	CEP68	protein_coding	30650
chr2	64000000	65240000	chr2	65203502	65227605	ENSG00000273763	4	-1		transcribed_processed_pseudogene	24103
chr2	64000000	65240000	chr2	65227788	65271253	ENSG00000138071	15	1	ACTR2	protein_coding	12212
chr2	64000000	65240000	chr2	64092652	64144420	ENSG00000197329	12	-1	PELI1	protein_coding	51768
chr2	64000000	65240000	chr2	64486353	64500904	ENSG00000223863	1	1	LINC01805	lncRNA	14551
chr2	64000000	65240000	chr2	64631621	64751005	ENSG00000179833	4	-1	SERTAD2	protein_coding	119384
chr2	64000000	65240000	chr2	64143239	64257610	ENSG00000225889	10	1		lncRNA	114371
chr2	64000000	65240000	chr2	63892146	64019428	ENSG00000143952	20	-1	VPS54	protein_coding	19428
chr2	64000000	65240000	chr2	64901840	65056226	ENSG00000237638	3	-1	LINC02245	lncRNA	154386
chr2	64000000	65240000	chr2	64988477	65023865	ENSG00000115902	11	1	SLC1A4	protein_coding	35388
chr2	69520000	70280000	chr2	69520043	69520174	ENSG00000207016	1	-1	SNORA36C	snoRNA	131
chr2	69520000	70280000	chr2	69594741	69595058	ENSG00000232228	1	-1	RPL36AP16	processed_pseudogene	317
chr2	69520000	70280000	chr2	69597353	69598951	ENSG00000229948	2	1	B3GALNT1P1	processed_pseudogene	1598
chr2	69520000	70280000	chr2	69663299	69664331	ENSG00000289250	1	1		lncRNA	1032
chr2	69520000	70280000	chr2	69700192	69713847	ENSG00000231024	1	-1		lncRNA	13655
chr2	69520000	70280000	chr2	69844509	69844933	ENSG00000275381	1	-1		processed_pseudogene	424
chr2	69520000	70280000	chr2	69873565	69873819	ENSG00000270723	1	-1	RPL23AP92	processed_pseudogene	254
chr2	69520000	70280000	chr2	69960089	69961631	ENSG00000244617	3	-1	ASPRV1	protein_coding	1542
chr2	69520000	70280000	chr2	70075014	70075272	ENSG00000263669	2	-1	RN7SL470P	misc_RNA	258
chr2	69520000	70280000	chr2	70087477	70089203	ENSG00000169564	7	1	PCBP1	protein_coding	1726
chr2	69520000	70280000	chr2	70102551	70102862	ENSG00000225392	1	1	MRPL36P1	processed_pseudogene	311
chr2	69520000	70280000	chr2	70124034	70132923	ENSG00000231327	3	-1	LINC01816	lncRNA	8889
chr2	69520000	70280000	chr2	70252918	70253005	ENSG00000221238	1	-1	MIR1285-2	miRNA	87
chr2	69520000	70280000	chr2	70253855	70254010	ENSG00000231414	1	-1	RPL39P15	processed_pseudogene	155
chr2	69520000	70280000	chr2	69789544	69799008	ENSG00000288869	2	-1	SMANTIS	lncRNA	9464
chr2	69520000	70280000	chr2	69893956	69905575	ENSG00000124380	11	1	SNRNP27	protein_coding	11619
chr2	69520000	70280000	chr2	69897688	69942945	ENSG00000059728	11	1	MXD1	protein_coding	45257
chr2	69520000	70280000	chr2	70089721	70096100	ENSG00000233060	1	1		lncRNA	6379
chr2	69520000	70280000	chr2	70149885	70248615	ENSG00000115998	8	-1	C2orf42	protein_coding	98730
chr2	69520000	70280000	chr2	70209444	70248660	ENSG00000116001	17	-1	TIA1	protein_coding	39216
chr2	69520000	70280000	chr2	70257386	70281185	ENSG00000116005	12	1	PCYOX1	protein_coding	22614
chr2	69520000	70280000	chr2	69644425	69827112	ENSG00000196975	16	1	ANXA4	protein_coding	182687
chr2	69520000	70280000	chr2	69829660	69881384	ENSG00000087338	5	1	GMCL1	protein_coding	51724
chr2	69520000	70280000	chr2	69960104	70103220	ENSG00000179818	17	-1	PCBP1-AS1	lncRNA	143116
chr2	69520000	70280000	chr2	69457997	69674349	ENSG00000115977	21	-1	AAK1	protein_coding	154349
chr2	84920000	85320000	chr2	84969747	84970695	ENSG00000290085	1	-1		lncRNA	948
chr2	84920000	85320000	chr2	85068809	85069031	ENSG00000235463	1	-1		processed_pseudogene	222
chr2	84920000	85320000	chr2	85102389	85102694	ENSG00000225787	1	-1	LSM3P3	processed_pseudogene	305
chr2	84920000	85320000	chr2	85186409	85187253	ENSG00000231134	1	1	TCF7L1-IT1	lncRNA	844
chr2	84920000	85320000	chr2	85204926	85205032	ENSG00000200701	1	1	RNU6-674P	snRNA	106
chr2	84920000	85320000	chr2	85262144	85262267	ENSG00000230299	1	-1	SNRPEP11	processed_pseudogene	123
chr2	84920000	85320000	chr2	85315041	85316529	ENSG00000246575	2	1		unprocessed_pseudogene	1488
chr2	84920000	85320000	chr2	84971093	85059472	ENSG00000176407	18	1	KCMF1	protein_coding	88379
chr2	84920000	85320000	chr2	85133392	85310387	ENSG00000152284	5	1	TCF7L1	protein_coding	176995
chr2	84920000	85320000	chr2	85061213	85067347	ENSG00000260840	2	-1	LINC01964	lncRNA	6134
chr2	84920000	85320000	chr2	85318027	85328251	ENSG00000152291	15	-1	TGOLN2	protein_coding	1973
chr2	84920000	85320000	chr2	84926019	84966685	ENSG00000287625	1	1		lncRNA	40666
chr2	97520000	98400000	chr2	97523949	97524976	ENSG00000235833	1	-1		processed_pseudogene	1027
chr2	97520000	98400000	chr2	97636780	97637803	ENSG00000228970	6	-1	UBTFL6	unprocessed_pseudogene	1023
chr2	97520000	98400000	chr2	97646062	97648383	ENSG00000135940	7	1	COX5B	protein_coding	2321
chr2	97520000	98400000	chr2	97655939	97664044	ENSG00000115073	8	-1	ACTR1B	protein_coding	8105
chr2	97520000	98400000	chr2	97664591	97664731	ENSG00000201806	1	-1	RNU4-8P	snRNA	140
chr2	97520000	98400000	chr2	97827248	97827545	ENSG00000235734	4	1	HMGN1P36	processed_pseudogene	297
chr2	97520000	98400000	chr2	97913054	97913117	ENSG00000238719	1	-1	RNU7-96P	snRNA	63
chr2	97520000	98400000	chr2	98206151	98207724	ENSG00000231635	1	1	ATP5F1BP1	processed_pseudogene	1573
chr2	97520000	98400000	chr2	98346995	98351140	ENSG00000227987	1	1		lncRNA	4145
chr2	97520000	98400000	chr2	97618638	97638417	ENSG00000286036	1	1		lncRNA	19779
chr2	97520000	98400000	chr2	97664217	97703066	ENSG00000228486	11	1	C2orf92	protein_coding	38849
chr2	97520000	98400000	chr2	97713576	97739862	ENSG00000115085	15	1	ZAP70	protein_coding	26286
chr2	97520000	98400000	chr2	98331389	98356005	ENSG00000222000	7	-1		lncRNA	24616
chr2	97520000	98400000	chr2	98346188	98398601	ENSG00000144191	12	1	CNGA3	protein_coding	52413
chr2	97520000	98400000	chr2	97756333	97995948	ENSG00000075568	17	-1	TMEM131	protein_coding	239615
chr2	97520000	98400000	chr2	98087116	98313299	ENSG00000168658	20	1	VWA3B	protein_coding	226183
chr2	97520000	98400000	chr2	97492663	97589877	ENSG00000196912	13	-1	ANKRD36B	protein_coding	69877
chr2	99520000	100560000	chr2	100370255	100370545	ENSG00000269383	2	-1	CYCSP7	processed_pseudogene	290
chr2	99520000	100560000	chr2	100377421	100377532	ENSG00000270699	1	1		processed_pseudogene	111
chr2	99520000	100560000	chr2	100425348	100426107	ENSG00000238029	1	1	RALBP1P2	processed_pseudogene	759
chr2	99520000	100560000	chr2	100509277	100509612	ENSG00000204637	4	1	ARPP19P2	processed_pseudogene	335
chr2	99520000	100560000	chr2	100104919	100107504	ENSG00000230393	1	1		lncRNA	2585
chr2	99520000	100560000	chr2	100208254	100251484	ENSG00000232084	5	1	LINC01104	lncRNA	43230
chr2	99520000	100560000	chr2	100271875	100322501	ENSG00000170500	13	-1	LONRF2	protein_coding	50626
chr2	99520000	100560000	chr2	100470482	100483280	ENSG00000204640	1	1	NMS	protein_coding	12798
chr2	99520000	100560000	chr2	100391860	100417668	ENSG00000115526	11	-1	CHST10	protein_coding	25808
chr2	99520000	100560000	chr2	99545419	100192428	ENSG00000144218	21	-1	AFF3	protein_coding	647009
chr2	101000000	101280000	chr2	100993676	101002244	ENSG00000223947	1	-1		lncRNA	2244
chr2	101000000	101280000	chr2	101068378	101068656	ENSG00000271532	1	1	BBIP1P1	processed_pseudogene	278
chr2	101000000	101280000	chr2	101272936	101273049	ENSG00000212283	1	-1	SNORD89	snoRNA	113
chr2	101000000	101280000	chr2	101002229	101024032	ENSG00000071082	11	1	RPL31	protein_coding	21803
chr2	101000000	101280000	chr2	101151660	101155412	ENSG00000272902	2	1	TBC1D8-AS1	lncRNA	3752
chr2	101000000	101280000	chr2	101252886	101270316	ENSG00000158435	8	1	CNOT11	protein_coding	17430
chr2	101000000	101280000	chr2	101271219	101308701	ENSG00000163162	9	-1	RNF149	protein_coding	8781
chr2	101000000	101280000	chr2	101007228	101252866	ENSG00000204634	13	-1	TBC1D8	protein_coding	245638
chr2	108760000	110240000	chr2	108878308	108878460	ENSG00000227470	1	1	RPL39P16	processed_pseudogene	152
chr2	108760000	110240000	chr2	109127327	109128930	ENSG00000259863	1	-1	SH3RF3-AS1	lncRNA	1603
chr2	108760000	110240000	chr2	109124357	109124609	ENSG00000277628	1	-1	Metazoa_SRP	misc_RNA	252
chr2	108760000	110240000	chr2	109141490	109141588	ENSG00000264934	1	-1	MIR4265	miRNA	98
chr2	108760000	110240000	chr2	109251422	109251646	ENSG00000228551	1	1	SNRPGP9	processed_pseudogene	224
chr2	108760000	110240000	chr2	109313571	109313625	ENSG00000265965	1	-1	MIR4266	miRNA	54
chr2	108760000	110240000	chr2	109552536	109552846	ENSG00000237916	1	1	RPL37P12	processed_pseudogene	310
chr2	108760000	110240000	chr2	109594693	109605698	ENSG00000230696	1	-1		lncRNA	11005
chr2	108760000	110240000	chr2	109614364	109618990	ENSG00000198142	5	1	SOWAHC	protein_coding	4626
chr2	108760000	110240000	chr2	109665209	109665742	ENSG00000230603	1	1		processed_pseudogene	533
chr2	108760000	110240000	chr2	109667128	109668002	ENSG00000231099	1	1	BMS1P19	processed_pseudogene	874
chr2	108760000	110240000	chr2	109737139	109737523	ENSG00000233707	3	-1	RPL22P11	processed_pseudogene	384
chr2	108760000	110240000	chr2	109732731	109733136	ENSG00000233307	1	1	SRSF3P6	processed_pseudogene	405
chr2	108760000	110240000	chr2	109758799	109760364	ENSG00000282033	1	-1		lncRNA	1565
chr2	108760000	110240000	chr2	109984058	109984988	ENSG00000240069	1	1	GPAA1P1	transcribed_processed_pseudogene	930
chr2	108760000	110240000	chr2	109986939	109988394	ENSG00000225108	1	-1	ZBTB45P1	processed_pseudogene	1455
chr2	108760000	110240000	chr2	109987063	109996140	ENSG00000204588	5	1	LINC01123	lncRNA	9077
chr2	108760000	110240000	chr2	110007675	110010783	ENSG00000235721	1	1		processed_pseudogene	3108
chr2	108760000	110240000	chr2	110012265	110012601	ENSG00000229730	2	-1		processed_pseudogene	336
chr2	108760000	110240000	chr2	110069961	110070042	ENSG00000265682	1	-1	MIR4267	miRNA	81
chr2	108760000	110240000	chr2	110086433	110086523	ENSG00000264979	1	-1	MIR4436B1	miRNA	90
chr2	108760000	110240000	chr2	110184054	110185179	ENSG00000233370	1	1	ACTR1AP1	processed_pseudogene	1125
chr2	108760000	110240000	chr2	108719482	108785810	ENSG00000153201	17	1	RANBP2	protein_coding	25810
chr2	108760000	110240000	chr2	109898432	109968557	ENSG00000284337	1	1		protein_coding	70125
chr2	108760000	110240000	chr2	109898428	109925625	ENSG00000256977	13	1	LIMS3	protein_coding	27197
chr2	108760000	110240000	chr2	109933161	109968577	ENSG00000290731	1	1		lncRNA	35416
chr2	108760000	110240000	chr2	110022447	110050064	ENSG00000283283	2	-1		unprocessed_pseudogene	27617
chr2	108760000	110240000	chr2	110122311	110205066	ENSG00000144061	14	-1	NPHP1	protein_coding	82755
chr2	108760000	110240000	chr2	108894471	108989372	ENSG00000135960	10	-1	EDAR	protein_coding	94901
chr2	108760000	110240000	chr2	108786757	108885477	ENSG00000163006	12	1	CCDC138	protein_coding	98720
chr2	108760000	110240000	chr2	109129205	109504634	ENSG00000172985	11	1	SH3RF3	protein_coding	375429
chr2	108760000	110240000	chr2	109542799	109614143	ENSG00000186522	15	-1	SEPTIN10	protein_coding	71344
chr2	108760000	110240000	chr2	109792758	109857705	ENSG00000015568	13	1	RGPD5	protein_coding	64947
chr2	108760000	110240000	chr2	109937438	109985124	ENSG00000283684	1	1		lncRNA	47686
chr2	108760000	110240000	chr2	109947672	109974085	ENSG00000186148	14	1		transcribed_unprocessed_pseudogene	26413
chr2	108760000	110240000	chr2	110211529	110245420	ENSG00000175701	11	-1	MTLN	protein_coding	28471
chr2	108760000	110240000	chr2	110231106	110266559	ENSG00000290732	1	1		lncRNA	8894
chr2	108760000	110240000	chr2	110083870	110116022	ENSG00000144063	4	-1	MALL	protein_coding	32152
chr2	155320000	157280000	chr2	155330421	155330527	ENSG00000206718	1	1	RNU6-546P	snRNA	106
chr2	155320000	157280000	chr2	156033247	156034080	ENSG00000235548	1	-1	HEBP2P1	processed_pseudogene	833
chr2	155320000	157280000	chr2	156777706	156778372	ENSG00000238069	1	-1	RPLP0P7	processed_pseudogene	666
chr2	155320000	157280000	chr2	157210847	157211539	ENSG00000213194	3	-1	CDK7P1	processed_pseudogene	692
chr2	155320000	157280000	chr2	156305108	156320255	ENSG00000282440	1	-1		lncRNA	15147
chr2	155320000	157280000	chr2	156324437	156342348	ENSG00000153234	16	-1	NR4A2	protein_coding	17911
chr2	155320000	157280000	chr2	156655224	156695659	ENSG00000283436	1	1	LINC01958	lncRNA	40435
chr2	155320000	157280000	chr2	156788731	156865701	ENSG00000287048	1	1		lncRNA	76970
chr2	155320000	157280000	chr2	156803339	156891160	ENSG00000286889	1	1		lncRNA	87821
chr2	155320000	157280000	chr2	157033837	157049716	ENSG00000286530	1	1		lncRNA	15879
chr2	155320000	157280000	chr2	155525424	155664668	ENSG00000286679	1	1		lncRNA	139244
chr2	155320000	157280000	chr2	156435290	156613735	ENSG00000115159	17	1	GPD2	protein_coding	178445
chr2	155320000	157280000	chr2	157257705	157318491	ENSG00000136542	9	1	GALNT5	protein_coding	22295
chr2	155320000	157280000	chr2	156011530	156254950	ENSG00000226383	7	-1	LINC01876	lncRNA	243420
chr2	168120000	168960000	chr2	168231921	168232220	ENSG00000238259	1	-1	PHF5AP5	processed_pseudogene	299
chr2	168120000	168960000	chr2	168451324	168451606	ENSG00000241074	3	1	RN7SL813P	misc_RNA	282
chr2	168120000	168960000	chr2	168582943	168583018	ENSG00000265694	1	1	MIR4774	miRNA	75
chr2	168120000	168960000	chr2	168606390	168606496	ENSG00000199348	1	-1	RNU6-766P	snRNA	106
chr2	168120000	168960000	chr2	168771951	168786961	ENSG00000227617	9	-1	CERS6-AS1	lncRNA	15010
chr2	168120000	168960000	chr2	168834132	168913371	ENSG00000152253	9	-1	SPC25	protein_coding	79239
chr2	168120000	168960000	chr2	168901291	168910000	ENSG00000152254	11	1	G6PC2	protein_coding	8709
chr2	168120000	168960000	chr2	168456249	168775134	ENSG00000172292	15	1	CERS6	protein_coding	318885
chr2	168120000	168960000	chr2	167954020	168247595	ENSG00000198648	12	-1	STK39	protein_coding	127595
chr2	168120000	168960000	chr2	168915498	169031324	ENSG00000073734	10	-1	ABCB11	protein_coding	44502
chr2	168120000	168960000	chr2	168786539	168865514	ENSG00000163072	16	1	NOSTRIN	protein_coding	78975
chr2	173360000	174440000	chr2	173431349	173431812	ENSG00000213148	3	-1	JPT1P1	processed_pseudogene	463
chr2	173360000	174440000	chr2	173477996	173478400	ENSG00000236832	1	-1	CBY1P1	processed_pseudogene	404
chr2	173360000	174440000	chr2	173485865	173486362	ENSG00000226131	1	-1	PPIAP66	processed_pseudogene	497
chr2	173360000	174440000	chr2	173575110	173576341	ENSG00000237016	1	-1		processed_pseudogene	1231
chr2	173360000	174440000	chr2	173705948	173706148	ENSG00000237617	1	-1		processed_pseudogene	200
chr2	173360000	174440000	chr2	173811076	173811392	ENSG00000270460	1	1		lncRNA	316
chr2	173360000	174440000	chr2	173871653	173872465	ENSG00000234415	1	-1	RPL5P7	processed_pseudogene	812
chr2	173360000	174440000	chr2	173968351	173969418	ENSG00000271151	1	1		lncRNA	1067
chr2	173360000	174440000	chr2	173965488	173966068	ENSG00000289296	2	1		lncRNA	580
chr2	173360000	174440000	chr2	174011856	174012975	ENSG00000273258	1	-1		lncRNA	1119
chr2	173360000	174440000	chr2	174025280	174027163	ENSG00000260868	1	1	LINC01960	lncRNA	1883
chr2	173360000	174440000	chr2	174043008	174043880	ENSG00000235414	3	1	RPSAP24	processed_pseudogene	872
chr2	173360000	174440000	chr2	174171891	174172725	ENSG00000270799	1	1		processed_pseudogene	834
chr2	173360000	174440000	chr2	174240143	174240457	ENSG00000243770	3	-1	RN7SL65P	misc_RNA	314
chr2	173360000	174440000	chr2	174264878	174264981	ENSG00000201088	1	-1	Y_RNA	misc_RNA	103
chr2	173360000	174440000	chr2	174299324	174300956	ENSG00000227180	1	-1	LRRC2P1	processed_pseudogene	1632
chr2	173360000	174440000	chr2	174310015	174310974	ENSG00000237804	1	-1	HNRNPA1P39	processed_pseudogene	959
chr2	173360000	174440000	chr2	174326027	174330643	ENSG00000231453	1	1	LINC01305	lncRNA	4616
chr2	173360000	174440000	chr2	174334438	174337566	ENSG00000280414	1	-1		TEC	3128
chr2	173360000	174440000	chr2	174334954	174338500	ENSG00000217236	2	1	SP9	protein_coding	3546
chr2	173360000	174440000	chr2	173354820	173368997	ENSG00000144354	15	1	CDCA7	protein_coding	8997
chr2	173360000	174440000	chr2	174348022	174395712	ENSG00000138433	16	-1	CIR1	protein_coding	47690
chr2	173360000	174440000	chr2	174395730	174429575	ENSG00000144306	15	1	SCRN3	protein_coding	33845
chr2	173360000	174440000	chr2	173880850	173965373	ENSG00000172845	18	-1	SP3	protein_coding	84523
chr2	173360000	174440000	chr2	174072447	174248599	ENSG00000138430	16	-1	OLA1	protein_coding	176152
chr2	173360000	174440000	chr2	174431571	174487094	ENSG00000163328	14	-1	GPR155	protein_coding	8429
chr2	181720000	182160000	chr2	181738606	181738715	ENSG00000221023	1	1	RNU6ATAC19P	snRNA	109
chr2	181720000	182160000	chr2	181887851	181891663	ENSG00000260742	1	-1	ITPRID2-DT	lncRNA	3812
chr2	181720000	182160000	chr2	181961212	181962478	ENSG00000213958	2	-1	KRT18P29	processed_pseudogene	1266
chr2	181720000	182160000	chr2	182048822	182048905	ENSG00000222418	1	1	RNA5SP113	rRNA_pseudogene	83
chr2	181720000	182160000	chr2	181891730	181930738	ENSG00000138434	17	1	ITPRID2	protein_coding	39008
chr2	181720000	182160000	chr2	181954241	182131398	ENSG00000150722	11	1	PPP1R1C	protein_coding	177157
chr2	181720000	182160000	chr2	182139968	182523359	ENSG00000115252	19	-1	PDE1A	protein_coding	20032
chr2	218160000	219720000	chr2	218162841	218166962	ENSG00000163464	8	-1	CXCR1	protein_coding	4121
chr2	218160000	219720000	chr2	218200434	218201388	ENSG00000224159	1	1	HMGB1P9	processed_pseudogene	954
chr2	218160000	219720000	chr2	218255319	218257366	ENSG00000261338	2	1		lncRNA	2047
chr2	218160000	219720000	chr2	218259496	218263861	ENSG00000179921	15	1	GPBAR1	protein_coding	4365
chr2	218160000	219720000	chr2	218280125	218280188	ENSG00000284173	1	-1	MIR6513	miRNA	63
chr2	218160000	219720000	chr2	218341911	218341980	ENSG00000278524	1	1	MIR6810	miRNA	69
chr2	218160000	219720000	chr2	218354075	218354572	ENSG00000230580	1	1	RPL19P5	processed_pseudogene	497
chr2	218160000	219720000	chr2	218366661	218367885	ENSG00000225062	2	-1	CATIP-AS1	lncRNA	1224
chr2	218160000	219720000	chr2	218368113	218368857	ENSG00000288819	2	1		lncRNA	744
chr2	218160000	219720000	chr2	218398743	218399219	ENSG00000273361	1	-1		lncRNA	476
chr2	218160000	219720000	chr2	218402646	218402722	ENSG00000199121	4	1	MIR26B	miRNA	76
chr2	218160000	219720000	chr2	218500729	218501037	ENSG00000222714	1	-1	RN7SKP38	misc_RNA	308
chr2	218160000	219720000	chr2	218589214	218589320	ENSG00000207393	1	-1	RNU6-136P	snRNA	106
chr2	218160000	219720000	chr2	218663892	218672002	ENSG00000163481	8	-1	RNF25	protein_coding	8110
chr2	218160000	219720000	chr2	218799729	218802554	ENSG00000286154	1	-1		lncRNA	2825
chr2	218160000	219720000	chr2	218818690	218819144	ENSG00000272555	1	1		lncRNA	454
chr2	218160000	219720000	chr2	218823090	218823154	ENSG00000283639	1	1	MIR9500	miRNA	64
chr2	218160000	219720000	chr2	218841599	218842065	ENSG00000232625	1	1	RPL23AP31	processed_pseudogene	466
chr2	218160000	219720000	chr2	218916184	218916287	ENSG00000200029	1	-1	RNU6-642P	snRNA	103
chr2	218160000	219720000	chr2	218953401	218954050	ENSG00000224928	2	-1	KRT8P30	processed_pseudogene	649
chr2	218160000	219720000	chr2	218959666	218962155	ENSG00000171450	6	1	CDK5R2	protein_coding	2489
chr2	218160000	219720000	chr2	218981087	218985184	ENSG00000163497	3	-1	FEV	protein_coding	4097
chr2	218160000	219720000	chr2	218990189	218993422	ENSG00000163499	12	-1	CRYBA2	protein_coding	3233
chr2	218160000	219720000	chr2	219001645	219001708	ENSG00000198973	4	-1	MIR375	miRNA	63
chr2	218160000	219720000	chr2	219054424	219060921	ENSG00000163501	7	-1	IHH	protein_coding	6497
chr2	218160000	219720000	chr2	219058688	219058750	ENSG00000264755	1	-1	MIR3131	miRNA	62
chr2	218160000	219720000	chr2	219065308	219070022	ENSG00000286606	1	1		lncRNA	4714
chr2	218160000	219720000	chr2	219102434	219102719	ENSG00000240317	3	1	RN7SL764P	misc_RNA	285
chr2	218160000	219720000	chr2	219171897	219178106	ENSG00000115649	16	-1	CNPPD1	protein_coding	6209
chr2	218160000	219720000	chr2	219177068	219177530	ENSG00000290093	1	1		lncRNA	462
chr2	218160000	219720000	chr2	219198640	219200034	ENSG00000287529	1	-1		lncRNA	1394
chr2	218160000	219720000	chr2	219219380	219229717	ENSG00000198925	12	-1	ATG9A	protein_coding	10337
chr2	218160000	219720000	chr2	219236598	219245478	ENSG00000163521	16	-1	GLB1L	protein_coding	8880
chr2	218160000	219720000	chr2	219245455	219250337	ENSG00000115661	14	1	STK16	protein_coding	4882
chr2	218160000	219720000	chr2	219294111	219294200	ENSG00000207647	1	-1	MIR153-1	miRNA	89
chr2	218160000	219720000	chr2	219358870	219358983	ENSG00000232789	1	-1		unprocessed_pseudogene	113
chr2	218160000	219720000	chr2	219425071	219426184	ENSG00000234638	1	-1		lncRNA	1113
chr2	218160000	219720000	chr2	219427477	219429319	ENSG00000280323	1	1		TEC	1842
chr2	218160000	219720000	chr2	219418377	219426735	ENSG00000175084	13	1	DES	protein_coding	8358
chr2	218160000	219720000	chr2	219497611	219498706	ENSG00000268603	2	-1		lncRNA	1095
chr2	218160000	219720000	chr2	219538954	219543809	ENSG00000123989	15	-1	CHPF	protein_coding	4855
chr2	218160000	219720000	chr2	219547211	219547658	ENSG00000268896	1	-1		lncRNA	447
chr2	218160000	219720000	chr2	219549073	219549147	ENSG00000265252	1	-1	MIR3132	miRNA	74
chr2	218160000	219720000	chr2	219559083	219559626	ENSG00000269068	1	1		lncRNA	543
chr2	218160000	219720000	chr2	219569162	219575711	ENSG00000123999	5	1	INHA	protein_coding	6549
chr2	218160000	219720000	chr2	219590687	219590984	ENSG00000222678	1	-1	RN7SKP213	misc_RNA	297
chr2	218160000	219720000	chr2	219625059	219626693	ENSG00000228973	1	-1		lncRNA	1634
chr2	218160000	219720000	chr2	219645090	219645631	ENSG00000267919	1	1		lncRNA	541
chr2	218160000	219720000	chr2	219684030	219684795	ENSG00000231802	1	-1	DNAJB6P3	processed_pseudogene	765
chr2	218160000	219720000	chr2	219697799	219698214	ENSG00000223903	1	1	RPL23P4	processed_pseudogene	415
chr2	218160000	219720000	chr2	218264129	218270178	ENSG00000127837	10	-1	AAMP	protein_coding	6049
chr2	218160000	219720000	chr2	218274197	218292586	ENSG00000135926	15	-1	TMBIM1	protein_coding	18389
chr2	218160000	219720000	chr2	218326889	218357966	ENSG00000237281	1	-1	CATIP-AS2	lncRNA	31077
chr2	218160000	219720000	chr2	218269651	218346793	ENSG00000127838	15	1	PNKD	protein_coding	77142
chr2	218160000	219720000	chr2	218382029	218396894	ENSG00000018280	17	1	SLC11A1	protein_coding	14865
chr2	218160000	219720000	chr2	218419121	218453295	ENSG00000127831	11	1	VIL1	protein_coding	34174
chr2	218160000	219720000	chr2	218397136	218405941	ENSG00000144579	9	1	CTDSP1	protein_coding	8805
chr2	218160000	219720000	chr2	218568580	218597080	ENSG00000144580	15	1	CNOT9	protein_coding	28500
chr2	218160000	219720000	chr2	218658764	218663443	ENSG00000074582	15	1	BCS1L	protein_coding	4679
chr2	218160000	219720000	chr2	218672069	218702716	ENSG00000163482	12	1	STK36	protein_coding	30647
chr2	218160000	219720000	chr2	218710835	218755416	ENSG00000135912	11	1	TTLL4	protein_coding	44581
chr2	218160000	219720000	chr2	218633329	218659655	ENSG00000115568	16	-1	ZNF142	protein_coding	26326
chr2	218160000	219720000	chr2	218781749	218815293	ENSG00000135929	9	1	CYP27A1	protein_coding	33544
chr2	218160000	219720000	chr2	218822308	218832086	ENSG00000115592	13	-1	PRKAG3	protein_coding	9778
chr2	218160000	219720000	chr2	218859805	218874233	ENSG00000115596	4	1	WNT6	protein_coding	14428
chr2	218160000	219720000	chr2	218900811	218930636	ENSG00000228135	1	-1	LINC01494	lncRNA	29825
chr2	218160000	219720000	chr2	218944629	218961903	ENSG00000235024	1	-1	CDK5R2-AS1	lncRNA	17274
chr2	218160000	219720000	chr2	218975393	218989940	ENSG00000236445	5	1	LINC00608	lncRNA	14547
chr2	218160000	219720000	chr2	219002215	219015721	ENSG00000224090	1	1		lncRNA	13506
chr2	218160000	219720000	chr2	218909158	218939965	ENSG00000288898	1	1		lncRNA	30807
chr2	218160000	219720000	chr2	219161465	219170095	ENSG00000213901	11	-1	SLC23A3	protein_coding	8630
chr2	218160000	219720000	chr2	219176225	219185475	ENSG00000144567	11	1	RETREG2	protein_coding	9250
chr2	218160000	219720000	chr2	219195237	219209651	ENSG00000158552	13	1	ZFAND2B	protein_coding	14414
chr2	218160000	219720000	chr2	219209772	219218994	ENSG00000115657	14	-1	ABCB6	protein_coding	9222
chr2	218160000	219720000	chr2	219209772	219222738	ENSG00000284820	1	-1		protein_coding	12966
chr2	218160000	219720000	chr2	219229783	219236679	ENSG00000163516	14	1	ANKZF1	protein_coding	6896
chr2	218160000	219720000	chr2	219253243	219272197	ENSG00000243910	8	1	TUBA4B	protein_coding	18954
chr2	218160000	219720000	chr2	219249710	219277902	ENSG00000127824	15	-1	TUBA4A	protein_coding	28192
chr2	218160000	219720000	chr2	219289623	219309648	ENSG00000054356	14	-1	PTPRN	protein_coding	20025
chr2	218160000	219720000	chr2	219299002	219304130	ENSG00000230432	1	1		lncRNA	5128
chr2	218160000	219720000	chr2	219327407	219333177	ENSG00000182698	12	-1	RESP18	protein_coding	5770
chr2	218160000	219720000	chr2	219388496	219403633	ENSG00000229525	1	1	DNPEP-AS1	lncRNA	15137
chr2	218160000	219720000	chr2	219372043	219400022	ENSG00000123992	20	-1	DNPEP	protein_coding	27979
chr2	218160000	219720000	chr2	219434843	219493629	ENSG00000072195	15	1	SPEG	protein_coding	58786
chr2	218160000	219720000	chr2	219482073	219516877	ENSG00000227432	1	-1	ASIC4-AS1	lncRNA	34804
chr2	218160000	219720000	chr2	219491867	219498244	ENSG00000286143	1	1		protein_coding	6377
chr2	218160000	219720000	chr2	219498865	219513898	ENSG00000144591	20	1	GMPPA	protein_coding	15033
chr2	218160000	219720000	chr2	219496131	219498287	ENSG00000286095	3	1	SPEGNB	protein_coding	2156
chr2	218160000	219720000	chr2	219514170	219538772	ENSG00000072182	14	1	ASIC4	protein_coding	24602
chr2	218160000	219720000	chr2	219550728	219571859	ENSG00000124006	15	-1	OBSL1	protein_coding	21131
chr2	218160000	219720000	chr2	219597857	219616451	ENSG00000144589	22	1	STK11IP	protein_coding	18594
chr2	218160000	219720000	chr2	219627394	219641980	ENSG00000114923	17	1	SLC4A3	protein_coding	14586
chr2	218160000	219720000	chr2	219685381	219737937	ENSG00000227308	2	1	LINC02832	lncRNA	34619
chr2	218160000	219720000	chr2	218880852	218899581	ENSG00000135925	9	1	WNT10A	protein_coding	18729
chr2	218160000	219720000	chr2	219002846	219041527	ENSG00000181378	14	-1	CFAP65	protein_coding	38681
chr2	218160000	219720000	chr2	218450251	218568351	ENSG00000135913	11	-1	USP37	protein_coding	118100
chr2	218160000	219720000	chr2	218607855	218637184	ENSG00000115556	14	1	PLCD4	protein_coding	29329
chr2	218160000	219720000	chr2	218217141	218254356	ENSG00000163466	16	1	ARPC2	protein_coding	37215
chr2	218160000	219720000	chr2	218356857	218368099	ENSG00000158428	4	1	CATIP	protein_coding	11242
chr2	218160000	219720000	chr2	219543663	219550595	ENSG00000188760	11	1	TMEM198	protein_coding	6932
chr2	218160000	219720000	chr2	219279342	219286898	ENSG00000135924	17	1	DNAJB2	protein_coding	7556
chr2	218160000	219720000	chr2	219075329	219170827	ENSG00000280537	2	-1		protein_coding	95498
chr2	218160000	219720000	chr2	219069355	219160869	ENSG00000187736	14	-1	NHEJ1	protein_coding	91514
chr2	222640000	223960000	chr2	222677677	222678289	ENSG00000233751	1	-1	RRAS2P2	processed_pseudogene	612
chr2	222640000	223960000	chr2	222698623	222699484	ENSG00000203531	3	-1		processed_pseudogene	861
chr2	222640000	223960000	chr2	222726457	222726834	ENSG00000235225	1	1	RPL31P17	processed_pseudogene	377
chr2	222640000	223960000	chr2	222904640	222905055	ENSG00000224121	1	-1	ATG12P2	processed_pseudogene	415
chr2	222640000	223960000	chr2	222917387	222919363	ENSG00000234193	1	-1	ACSL3-AS1	lncRNA	1976
chr2	222640000	223960000	chr2	222945930	222946388	ENSG00000278083	1	-1		processed_pseudogene	458
chr2	222640000	223960000	chr2	223248498	223248794	ENSG00000243125	3	-1	RN7SL807P	misc_RNA	296
chr2	222640000	223960000	chr2	223398267	223398546	ENSG00000233299	1	-1	HIGD1AP4	processed_pseudogene	279
chr2	222640000	223960000	chr2	223498773	223504611	ENSG00000231189	1	1		lncRNA	5838
chr2	222640000	223960000	chr2	223596940	223602361	ENSG00000171951	5	-1	SCG2	protein_coding	5421
chr2	222640000	223960000	chr2	223704621	223705338	ENSG00000226539	1	1	MLXP1	processed_pseudogene	717
chr2	222640000	223960000	chr2	223957463	223967714	ENSG00000135900	4	1	MRPL44	protein_coding	2537
chr2	222640000	223960000	chr2	222566899	222656092	ENSG00000116120	11	-1	FARSB	protein_coding	16092
chr2	222640000	223960000	chr2	222860942	222944639	ENSG00000123983	15	1	ACSL3	protein_coding	83697
chr2	222640000	223960000	chr2	223505476	223510933	ENSG00000235610	1	1		lncRNA	5457
chr2	222640000	223960000	chr2	222671658	222709930	ENSG00000124003	13	1	MOGAT1	protein_coding	38272
chr2	222640000	223960000	chr2	223052190	223198399	ENSG00000152049	7	1	KCNE4	protein_coding	146209
chr2	222640000	223960000	chr2	223855716	223945357	ENSG00000085449	15	-1	WDFY1	protein_coding	89641
chr2	222640000	223960000	chr2	223667680	223838027	ENSG00000152056	18	-1	AP1S3	protein_coding	170347
chr2	222640000	223960000	chr2	223757258	223945299	ENSG00000286239	1	-1		protein_coding	188041
chr2	225640000	227320000	chr2	225668964	225670631	ENSG00000289265	1	1		lncRNA	1667
chr2	225640000	227320000	chr2	225761559	225762112	ENSG00000279015	1	1		TEC	553
chr2	225640000	227320000	chr2	225992981	225993197	ENSG00000230621	1	-1		processed_pseudogene	216
chr2	225640000	227320000	chr2	226658710	226658793	ENSG00000263363	1	-1	MIR5702	miRNA	83
chr2	225640000	227320000	chr2	226804036	226805061	ENSG00000261379	1	1		lncRNA	1025
chr2	225640000	227320000	chr2	226835333	226835943	ENSG00000290086	1	-1		lncRNA	610
chr2	225640000	227320000	chr2	226968989	226969122	ENSG00000212391	1	-1		snoRNA	133
chr2	225640000	227320000	chr2	226180044	226185371	ENSG00000235070	3	-1		lncRNA	5327
chr2	225640000	227320000	chr2	226800146	226813741	ENSG00000272622	2	1		lncRNA	13595
chr2	225640000	227320000	chr2	226731312	226799820	ENSG00000169047	6	-1	IRS1	protein_coding	68508
chr2	225640000	227320000	chr2	226835581	226999215	ENSG00000144468	17	1	RHBDD1	protein_coding	163634
chr2	225640000	227320000	chr2	227164624	227314792	ENSG00000169031	21	1	COL4A3	protein_coding	150168
chr2	225640000	227320000	chr2	227221052	227325711	ENSG00000236432	8	-1	MFF-DT	lncRNA	98948
chr2	225640000	227320000	chr2	227002714	227164453	ENSG00000081052	14	-1	COL4A4	protein_coding	161739
chr2	225640000	227320000	chr2	225399710	225729887	ENSG00000144460	13	1	NYAP2	protein_coding	89887
chr2	231520000	232560000	chr2	231518582	231521067	ENSG00000286942	1	-1		lncRNA	1067
chr2	231520000	232560000	chr2	231523187	231530445	ENSG00000171596	7	-1	NMUR1	protein_coding	7258
chr2	231520000	232560000	chr2	231559903	231560364	ENSG00000231494	1	1	RPL21P35	processed_pseudogene	461
chr2	231520000	232560000	chr2	231585864	231586327	ENSG00000228884	2	1	RPL23AP26	processed_pseudogene	463
chr2	231520000	232560000	chr2	231588959	231592776	ENSG00000286399	1	-1		lncRNA	3817
chr2	231520000	232560000	chr2	231592864	231594276	ENSG00000177673	4	1	TEX44	protein_coding	1412
chr2	231520000	232560000	chr2	231645998	231646273	ENSG00000239202	3	-1	RN7SL499P	misc_RNA	275
chr2	231520000	232560000	chr2	231711525	231711647	ENSG00000277986	1	1	U4	snRNA	122
chr2	231520000	232560000	chr2	231713314	231713398	ENSG00000284378	1	1	MIR1244-1	miRNA	84
chr2	231520000	232560000	chr2	231706895	231713551	ENSG00000187514	17	1	PTMA	protein_coding	6656
chr2	231520000	232560000	chr2	231705829	231707035	ENSG00000289018	2	-1		lncRNA	1206
chr2	231520000	232560000	chr2	231789481	231789887	ENSG00000237641	1	-1	RPL28P2	processed_pseudogene	406
chr2	231520000	232560000	chr2	231809846	231812352	ENSG00000261096	1	1		lncRNA	2506
chr2	231520000	232560000	chr2	231810348	231810844	ENSG00000260622	1	-1		processed_pseudogene	496
chr2	231520000	232560000	chr2	231892242	231892298	ENSG00000222246	1	-1	MIR1471	miRNA	56
chr2	231520000	232560000	chr2	231921809	231926396	ENSG00000163273	4	-1	NPPC	protein_coding	4587
chr2	231520000	232560000	chr2	232172653	232172747	ENSG00000207626	1	1	MIR562	miRNA	94
chr2	231520000	232560000	chr2	232343116	232343903	ENSG00000251485	1	1	NRBF2P6	processed_pseudogene	787
chr2	231520000	232560000	chr2	232349754	232351309	ENSG00000230122	1	-1	ECEL1P3	unprocessed_pseudogene	1555
chr2	231520000	232560000	chr2	232368576	232368697	ENSG00000275157	1	1		unprocessed_pseudogene	121
chr2	231520000	232560000	chr2	232378724	232382889	ENSG00000163283	7	1	ALPP	protein_coding	4165
chr2	231520000	232560000	chr2	232379635	232381674	ENSG00000224516	5	-1		lncRNA	2039
chr2	231520000	232560000	chr2	232386701	232387457	ENSG00000244280	2	-1	ECEL1P2	transcribed_unprocessed_pseudogene	756
chr2	231520000	232560000	chr2	232385750	232387044	ENSG00000290681	1	-1	ECEL1P2	lncRNA	1294
chr2	231520000	232560000	chr2	232415818	232419816	ENSG00000204121	2	-1	ECEL1P1	unprocessed_pseudogene	3998
chr2	231520000	232560000	chr2	232420661	232421461	ENSG00000237087	1	-1		lncRNA	800
chr2	231520000	232560000	chr2	232442034	232447418	ENSG00000223788	4	1	DIS3L2P1	unprocessed_pseudogene	5384
chr2	231520000	232560000	chr2	232479827	232487834	ENSG00000171551	12	-1	ECEL1	protein_coding	8007
chr2	231520000	232560000	chr2	232525993	232536667	ENSG00000135902	10	1	CHRND	protein_coding	10674
chr2	231520000	232560000	chr2	232539692	232548115	ENSG00000196811	13	1	CHRNG	protein_coding	8423
chr2	231520000	232560000	chr2	232543883	232550557	ENSG00000221944	9	-1	TIGD1	protein_coding	6674
chr2	231520000	232560000	chr2	232550474	232550573	ENSG00000284407	1	-1	MIR5001	miRNA	99
chr2	231520000	232560000	chr2	231781671	231809254	ENSG00000144524	18	1	COPS7B	protein_coding	27583
chr2	231520000	232560000	chr2	232406844	232410714	ENSG00000163286	9	1	ALPG	protein_coding	3870
chr2	231520000	232560000	chr2	232456125	232460753	ENSG00000163295	5	1	ALPI	protein_coding	4628
chr2	231520000	232560000	chr2	232550659	232583644	ENSG00000135930	15	1	EIF4E2	protein_coding	9341
chr2	231520000	232560000	chr2	231961245	232344350	ENSG00000144535	20	1	DIS3L2	protein_coding	383105
chr2	231520000	232560000	chr2	231978488	232015720	ENSG00000227033	1	-1		lncRNA	37232
chr2	231520000	232560000	chr2	232520388	232525716	ENSG00000237412	7	1	PRSS56	protein_coding	5328
chr2	231520000	232560000	chr2	231732433	231786272	ENSG00000156973	14	-1	PDE6D	protein_coding	53839
chr2	232560000	233360000	chr2	232649849	232650136	ENSG00000244384	3	1	RN7SL359P	misc_RNA	287
chr2	232560000	233360000	chr2	232729523	232730198	ENSG00000213055	3	-1	EEF1B2P7	processed_pseudogene	675
chr2	232560000	233360000	chr2	232782665	232782766	ENSG00000252452	1	1	RNU6-107P	snRNA	101
chr2	232560000	233360000	chr2	232828653	232828751	ENSG00000199781	1	1	Y_RNA	misc_RNA	98
chr2	232560000	233360000	chr2	233032672	233035057	ENSG00000115488	3	1	NEU2	protein_coding	2385
chr2	232560000	233360000	chr2	233177184	233180112	ENSG00000289129	2	-1		lncRNA	2928
chr2	232560000	233360000	chr2	233205199	233205479	ENSG00000263941	2	1	RN7SL32P	misc_RNA	280
chr2	232560000	233360000	chr2	233275727	233276002	ENSG00000252010	1	1	SCARNA5	scaRNA	275
chr2	232560000	233360000	chr2	233288676	233288940	ENSG00000251791	1	1	SCARNA6	scaRNA	264
chr2	232560000	233360000	chr2	233351132	233353416	ENSG00000259793	1	-1		lncRNA	2284
chr2	232560000	233360000	chr2	232580948	232611971	ENSG00000237126	8	-1		lncRNA	31023
chr2	232560000	233360000	chr2	232550659	232583644	ENSG00000135930	15	1	EIF4E2	protein_coding	23644
chr2	232560000	233360000	chr2	232760146	232767949	ENSG00000241409	1	-1		lncRNA	7803
chr2	232560000	233360000	chr2	232765802	232776565	ENSG00000115474	7	-1	KCNJ13	protein_coding	10763
chr2	232560000	233360000	chr2	232857270	232878708	ENSG00000182600	10	1	SNORC	protein_coding	21438
chr2	232560000	233360000	chr2	233012614	233015885	ENSG00000222001	2	1		lncRNA	3271
chr2	232560000	233360000	chr2	233210051	233295674	ENSG00000085978	22	1	ATG16L1	protein_coding	85623
chr2	232560000	233360000	chr2	232606057	232682776	ENSG00000115468	13	1	EFHD1	protein_coding	76719
chr2	232560000	233360000	chr2	233059967	233207903	ENSG00000168918	14	1	INPP5D	protein_coding	147936
chr2	232560000	233360000	chr2	232878701	233013256	ENSG00000066248	15	-1	NGEF	protein_coding	134555
chr2	232560000	233360000	chr2	233307816	233347055	ENSG00000130561	17	1	SAG	protein_coding	39239
chr2	232560000	233360000	chr2	233354494	233472104	ENSG00000077044	11	1	DGKD	protein_coding	5506
chr2	232560000	233360000	chr2	232697299	232860605	ENSG00000204120	16	1	GIGYF2	protein_coding	163306
chr2	238280000	240160000	chr2	238289127	238300185	ENSG00000283635	1	1		lncRNA	11058
chr2	238280000	240160000	chr2	238295392	238300620	ENSG00000232306	2	-1		lncRNA	5228
chr2	238280000	240160000	chr2	238412642	238412745	ENSG00000202099	1	1	RNU6-234P	snRNA	103
chr2	238280000	240160000	chr2	238427077	238427729	ENSG00000229915	1	-1		lncRNA	652
chr2	238280000	240160000	chr2	238454908	238457520	ENSG00000274346	1	1		unprocessed_pseudogene	2612
chr2	238280000	240160000	chr2	238735263	238735547	ENSG00000224252	1	-1		processed_pseudogene	284
chr2	238280000	240160000	chr2	238788648	238789716	ENSG00000226992	1	-1		lncRNA	1068
chr2	238280000	240160000	chr2	238919302	238926269	ENSG00000227744	4	-1	LINC01940	lncRNA	6967
chr2	238280000	240160000	chr2	239068817	239068914	ENSG00000266109	1	-1	MIR4440	miRNA	97
chr2	238280000	240160000	chr2	239085827	239085926	ENSG00000264810	1	-1	MIR4441	miRNA	99
chr2	238280000	240160000	chr2	239114858	239118842	ENSG00000286307	1	1		lncRNA	3984
chr2	238280000	240160000	chr2	239194118	239197654	ENSG00000287405	1	1		lncRNA	3536
chr2	238280000	240160000	chr2	239305462	239305545	ENSG00000265215	1	1	MIR4269	miRNA	83
chr2	238280000	240160000	chr2	239351724	239351804	ENSG00000264292	1	-1	MIR2467	miRNA	80
chr2	238280000	240160000	chr2	239401436	239402657	ENSG00000222020	5	1	HDAC4-AS1	lncRNA	1221
chr2	238280000	240160000	chr2	239493587	239496697	ENSG00000288082	1	-1		lncRNA	3110
chr2	238280000	240160000	chr2	239538379	239544876	ENSG00000286188	1	1		lncRNA	6497
chr2	238280000	240160000	chr2	239625698	239630839	ENSG00000227459	1	1		lncRNA	5141
chr2	238280000	240160000	chr2	239734956	239735538	ENSG00000259889	1	1		lncRNA	582
chr2	238280000	240160000	chr2	239943015	239943094	ENSG00000264279	1	-1	MIR4786	miRNA	79
chr2	238280000	240160000	chr2	240029491	240030429	ENSG00000182083	8	-1	OR6B2	protein_coding	938
chr2	238280000	240160000	chr2	240044571	240053521	ENSG00000178586	7	-1	OR6B3	protein_coding	8950
chr2	238280000	240160000	chr2	240079433	240080362	ENSG00000231278	1	1	OR9S24P	unprocessed_pseudogene	929
chr2	238280000	240160000	chr2	240109102	240110052	ENSG00000213048	3	1	OR5S1P	unitary_pseudogene	950
chr2	238280000	240160000	chr2	240126563	240136807	ENSG00000172428	11	-1	COPS9	protein_coding	10244
chr2	238280000	240160000	chr2	238320441	238400897	ENSG00000204104	12	1	TRAF3IP1	protein_coding	80456
chr2	238280000	240160000	chr2	238426742	238452250	ENSG00000065802	12	1	ASB1	protein_coding	25508
chr2	238280000	240160000	chr2	238711224	238722543	ENSG00000286160	2	-1		lncRNA	11319
chr2	238280000	240160000	chr2	238771768	238784764	ENSG00000286748	1	1		lncRNA	12996
chr2	238280000	240160000	chr2	238848032	238910534	ENSG00000233608	5	1	TWIST2	protein_coding	62502
chr2	238280000	240160000	chr2	239578301	239586094	ENSG00000196758	3	1	LINC02991	lncRNA	7793
chr2	238280000	240160000	chr2	239762860	239824764	ENSG00000220256	4	1		lncRNA	61904
chr2	238280000	240160000	chr2	240139026	240144562	ENSG00000178602	8	-1	OTOS	protein_coding	5536
chr2	238280000	240160000	chr2	238554541	238740849	ENSG00000234279	2	1	LINC01937	lncRNA	186308
chr2	238280000	240160000	chr2	238510690	238555054	ENSG00000225493	1	-1	LINC01107	lncRNA	44364
chr2	238280000	240160000	chr2	238244044	238290102	ENSG00000132326	13	-1	PER2	protein_coding	10102
chr2	238280000	240160000	chr2	239892450	240025743	ENSG00000130414	13	-1	NDUFA10	protein_coding	133293
chr2	238280000	240160000	chr2	239439595	239531363	ENSG00000286525	3	1		lncRNA	91768
chr2	238280000	240160000	chr2	239048168	239401654	ENSG00000068024	18	-1	HDAC4	protein_coding	353486
chr3	7320000	8640000	chr3	8359344	8366427	ENSG00000231401	2	-1		lncRNA	7083
chr3	7320000	8640000	chr3	8364529	8364648	ENSG00000253081	1	-1	RNU4ATAC17P	snRNA	119
chr3	7320000	8640000	chr3	7519741	7560333	ENSG00000236202	1	-1	GRM7-AS1	lncRNA	40592
chr3	7320000	8640000	chr3	8079322	8125538	ENSG00000228351	3	1		lncRNA	46216
chr3	7320000	8640000	chr3	8573726	8593124	ENSG00000224884	1	-1		lncRNA	19398
chr3	7320000	8640000	chr3	7606890	7790482	ENSG00000270207	2	-1		lncRNA	183592
chr3	7320000	8640000	chr3	8501807	8574668	ENSG00000071282	12	1	LMCD1	protein_coding	72861
chr3	7320000	8640000	chr3	8619386	8745040	ENSG00000125046	16	-1	SSUH2	protein_coding	20614
chr3	7320000	8640000	chr3	6770001	7741533	ENSG00000196277	17	1	GRM7	protein_coding	421533
chr3	7320000	8640000	chr3	7951263	8611924	ENSG00000227110	7	-1	LMCD1-AS1	lncRNA	660661
chr3	30000000	30760000	chr3	30304320	30304536	ENSG00000199927	2	-1		snoRNA	216
chr3	30000000	30760000	chr3	30304321	30304536	ENSG00000281710	1	-1	U3	snoRNA	215
chr3	30000000	30760000	chr3	30626423	30626797	ENSG00000224618	1	-1	KLHL25P1	processed_pseudogene	374
chr3	30000000	30760000	chr3	30697661	30699576	ENSG00000261468	1	1		lncRNA	1915
chr3	30000000	30760000	chr3	30292502	30305037	ENSG00000287774	3	1		lncRNA	12535
chr3	30000000	30760000	chr3	30521664	30526254	ENSG00000227549	2	-1		lncRNA	4590
chr3	30000000	30760000	chr3	30518833	30527193	ENSG00000227260	2	1	LINC01985	lncRNA	8360
chr3	30000000	30760000	chr3	30606601	30694142	ENSG00000163513	19	1	TGFBR2	protein_coding	87541
chr3	30000000	30760000	chr3	30726197	30894661	ENSG00000144644	15	-1	GADL1	protein_coding	33803
chr3	30000000	30760000	chr3	28574791	30010391	ENSG00000144642	22	1	RBMS3	protein_coding	10391
chr3	30000000	30760000	chr3	30373063	30469302	ENSG00000289450	2	1		lncRNA	96239
chr3	45000000	46600000	chr3	45034474	45034588	ENSG00000252410	1	-1	RNU5B-3P	snRNA	114
chr3	45000000	46600000	chr3	45159774	45160175	ENSG00000224094	1	-1	RPS24P8	processed_pseudogene	401
chr3	45000000	46600000	chr3	45224466	45226287	ENSG00000249992	2	-1	TMEM158	protein_coding	1821
chr3	45000000	46600000	chr3	45255409	45255620	ENSG00000202268	2	-1	U3	snoRNA	211
chr3	45000000	46600000	chr3	45742675	45742970	ENSG00000244357	3	1	RN7SL145P	misc_RNA	295
chr3	45000000	46600000	chr3	45749627	45750651	ENSG00000279017	1	1		TEC	1024
chr3	45000000	46600000	chr3	45883640	45884113	ENSG00000236930	1	-1	SDHDP4	processed_pseudogene	473
chr3	45000000	46600000	chr3	45903187	45903298	ENSG00000201635	1	1	Y_RNA	misc_RNA	111
chr3	45000000	46600000	chr3	45940933	45948351	ENSG00000172215	6	1	CXCR6	protein_coding	7418
chr3	45000000	46600000	chr3	45995958	46001283	ENSG00000288717	1	1		lncRNA	5325
chr3	45000000	46600000	chr3	46023296	46024156	ENSG00000226933	1	1	NRBF2P2	processed_pseudogene	860
chr3	45000000	46600000	chr3	46142358	46143677	ENSG00000229515	1	-1	FLT1P1	processed_pseudogene	1319
chr3	45000000	46600000	chr3	46310591	46311922	ENSG00000236736	1	-1	UQCRC2P1	processed_pseudogene	1331
chr3	45000000	46600000	chr3	46353864	46360940	ENSG00000121807	7	1	CCR2	protein_coding	7076
chr3	45000000	46600000	chr3	46370946	46376206	ENSG00000160791	14	1	CCR5	protein_coding	5260
chr3	45000000	46600000	chr3	46407166	46412997	ENSG00000121797	10	1	CCRL2	protein_coding	5831
chr3	45000000	46600000	chr3	46416524	46423591	ENSG00000283646	2	-1	LINC02009	lncRNA	7067
chr3	45000000	46600000	chr3	46557398	46559694	ENSG00000268324	2	1	LRRC2-AS1	lncRNA	2296
chr3	45000000	46600000	chr3	46558540	46562495	ENSG00000288718	1	1		lncRNA	3955
chr3	45000000	46600000	chr3	44975241	45036066	ENSG00000075914	13	1	EXOSC7	protein_coding	36066
chr3	45000000	46600000	chr3	45001548	45036071	ENSG00000163815	6	1	CLEC3B	protein_coding	34523
chr3	45000000	46600000	chr3	45483974	45509545	ENSG00000232455	2	-1	LARS2-AS1	lncRNA	25571
chr3	45000000	46600000	chr3	45676369	45689200	ENSG00000230530	2	-1	LIMD1-AS1	lncRNA	12831
chr3	45000000	46600000	chr3	45842265	45866571	ENSG00000285788	1	1		lncRNA	24306
chr3	45000000	46600000	chr3	45795970	45863928	ENSG00000288720	2	1		lncRNA	67958
chr3	45000000	46600000	chr3	45755449	45796574	ENSG00000163817	17	-1	SLC6A20	protein_coding	41125
chr3	45000000	46600000	chr3	45917903	45995824	ENSG00000163820	16	-1	FYCO1	protein_coding	77921
chr3	45000000	46600000	chr3	45884425	45903174	ENSG00000173585	18	1	CCR9	protein_coding	18749
chr3	45000000	46600000	chr3	46065695	46104017	ENSG00000288703	1	1		lncRNA	38322
chr3	45000000	46600000	chr3	46016990	46085825	ENSG00000173578	9	-1	XCR1	protein_coding	68835
chr3	45000000	46600000	chr3	46201711	46208313	ENSG00000163823	4	-1	CCR1	protein_coding	6602
chr3	45000000	46600000	chr3	46284775	46293795	ENSG00000288724	1	-1		lncRNA	9020
chr3	45000000	46600000	chr3	46435645	46485234	ENSG00000012223	13	-1	LTF	protein_coding	49589
chr3	45000000	46600000	chr3	46494611	46500950	ENSG00000163825	5	1	RTP3	protein_coding	6339
chr3	45000000	46600000	chr3	46574534	46582457	ENSG00000241186	10	1	TDGF1	protein_coding	7923
chr3	45000000	46600000	chr3	46581150	46617226	ENSG00000283877	1	1		protein_coding	18850
chr3	45000000	46600000	chr3	45388561	45554726	ENSG00000011376	12	1	LARS2	protein_coding	166165
chr3	45000000	46600000	chr3	45555394	45686341	ENSG00000144791	10	1	LIMD1	protein_coding	130947
chr3	45000000	46600000	chr3	45823316	45916042	ENSG00000163818	20	-1	LZTFL1	protein_coding	92726
chr3	45000000	46600000	chr3	45689056	45745412	ENSG00000211456	14	1	SACM1L	protein_coding	56356
chr3	45000000	46600000	chr3	46515385	46606948	ENSG00000163827	14	-1	LRRC2	protein_coding	84615
chr3	45000000	46600000	chr3	46364391	46407117	ENSG00000223552	3	-1	CCR5AS	lncRNA	42726
chr3	45000000	46600000	chr3	45082277	45146422	ENSG00000163814	8	-1	CDCP1	protein_coding	64145
chr3	45000000	46600000	chr3	46130890	46266706	ENSG00000183625	16	1	CCR3	protein_coding	135816
chr3	97720000	99000000	chr3	97759523	97761532	ENSG00000261292	2	1		lncRNA	2009
chr3	97720000	99000000	chr3	97973012	97975056	ENSG00000285614	1	1		lncRNA	2044
chr3	97720000	99000000	chr3	98053374	98053739	ENSG00000250750	1	1	OR5BM1P	unprocessed_pseudogene	365
chr3	97720000	99000000	chr3	98064472	98065396	ENSG00000213439	3	1	OR5AC1	protein_coding	924
chr3	97720000	99000000	chr3	98087173	98088102	ENSG00000196578	4	1	OR5AC2	protein_coding	929
chr3	97720000	99000000	chr3	98104754	98105672	ENSG00000251090	3	1	OR5AC4P	transcribed_unprocessed_pseudogene	918
chr3	97720000	99000000	chr3	98100793	98105672	ENSG00000290819	1	1		lncRNA	4879
chr3	97720000	99000000	chr3	98119191	98119731	ENSG00000248365	3	1	POU5F1P7	processed_pseudogene	540
chr3	97720000	99000000	chr3	98130721	98138548	ENSG00000231192	3	1	OR5H1	protein_coding	7827
chr3	97720000	99000000	chr3	98166696	98169774	ENSG00000233412	6	1	OR5H15	protein_coding	3078
chr3	97720000	99000000	chr3	98197211	98198138	ENSG00000249321	1	1	OR5H5P	unprocessed_pseudogene	927
chr3	97720000	99000000	chr3	98191359	98196755	ENSG00000289078	1	1		lncRNA	5396
chr3	97720000	99000000	chr3	98207423	98208341	ENSG00000249975	1	1	OR5H3P	unprocessed_pseudogene	918
chr3	97720000	99000000	chr3	98263252	98265356	ENSG00000230301	6	1	OR5H6	protein_coding	2104
chr3	97720000	99000000	chr3	98282505	98284070	ENSG00000197938	6	1	OR5H2	protein_coding	1565
chr3	97720000	99000000	chr3	98306752	98312843	ENSG00000232535	2	1	OR5H8	protein_coding	6091
chr3	97720000	99000000	chr3	98353854	98354819	ENSG00000196098	2	1	OR5K4	protein_coding	965
chr3	97720000	99000000	chr3	98390666	98391631	ENSG00000206536	1	1	OR5K3	protein_coding	965
chr3	97720000	99000000	chr3	98434034	98434847	ENSG00000244653	1	1	UBFD1P1	processed_pseudogene	813
chr3	97720000	99000000	chr3	98497681	98498631	ENSG00000231861	3	1	OR5K2	protein_coding	950
chr3	97720000	99000000	chr3	98522570	98525334	ENSG00000248839	1	1		lncRNA	2764
chr3	97720000	99000000	chr3	98525061	98525274	ENSG00000250562	1	-1	RPL38P4	processed_pseudogene	213
chr3	97720000	99000000	chr3	98573061	98578231	ENSG00000286602	1	-1		lncRNA	5170
chr3	97720000	99000000	chr3	98620065	98620618	ENSG00000240827	1	1	RPL19P7	processed_pseudogene	553
chr3	97720000	99000000	chr3	98657802	98660570	ENSG00000244153	1	1	WWP1P1	processed_pseudogene	2768
chr3	97720000	99000000	chr3	98782188	98783193	ENSG00000249274	1	1	PDLIM1P4	processed_pseudogene	1005
chr3	97720000	99000000	chr3	98804978	98805084	ENSG00000206712	1	-1	RNU6-26P	snRNA	106
chr3	97720000	99000000	chr3	98908459	98908564	ENSG00000207331	1	1	RNU6-1263P	snRNA	105
chr3	97720000	99000000	chr3	98981058	98983096	ENSG00000240476	1	1	LINC00973	lncRNA	2038
chr3	97720000	99000000	chr3	98987387	98987449	ENSG00000275108	1	1	U7	snRNA	62
chr3	97720000	99000000	chr3	97800732	97821923	ENSG00000282527	2	-1		lncRNA	21191
chr3	97720000	99000000	chr3	97836986	97874691	ENSG00000279658	1	-1		lncRNA	37705
chr3	97720000	99000000	chr3	97985102	98035315	ENSG00000183185	10	-1	GABRR3	protein_coding	50213
chr3	97720000	99000000	chr3	97941818	97972457	ENSG00000170854	18	-1	RIOX2	protein_coding	30639
chr3	97720000	99000000	chr3	98099908	98148134	ENSG00000249225	1	-1		lncRNA	48226
chr3	97720000	99000000	chr3	98147479	98156614	ENSG00000236032	3	1	OR5H14	protein_coding	9135
chr3	97720000	99000000	chr3	98222044	98222966	ENSG00000248507	1	1	OR5H4P	unprocessed_pseudogene	922
chr3	97720000	99000000	chr3	98238352	98239281	ENSG00000187900	4	1	OR5H7P	unprocessed_pseudogene	929
chr3	97720000	99000000	chr3	98531978	98534681	ENSG00000154165	5	1	GPR15	protein_coding	2703
chr3	97720000	99000000	chr3	98497912	98523066	ENSG00000080822	17	-1	CLDND1	protein_coding	25154
chr3	97720000	99000000	chr3	98463201	98472924	ENSG00000232382	2	1	OR5K1	protein_coding	9723
chr3	97720000	99000000	chr3	98579446	98593648	ENSG00000080819	9	-1	CPOX	protein_coding	14202
chr3	97720000	99000000	chr3	98706236	98732757	ENSG00000239445	6	-1	ST3GAL6-AS1	lncRNA	26521
chr3	97720000	99000000	chr3	98732236	98821201	ENSG00000064225	13	1	ST3GAL6	protein_coding	88965
chr3	97720000	99000000	chr3	98233651	98457898	ENSG00000251088	1	1		lncRNA	224247
chr3	97720000	99000000	chr3	97822011	97944984	ENSG00000080200	10	1	CRYBG3	protein_coding	122973
chr3	97720000	99000000	chr3	98262714	98325219	ENSG00000289509	1	-1		lncRNA	62505
chr3	97720000	99000000	chr3	97764521	97801229	ENSG00000113966	11	1	ARL6	protein_coding	36708
chr3	97720000	99000000	chr3	98795941	98901695	ENSG00000057019	16	-1	DCBLD2	protein_coding	105754
chr3	97720000	99000000	chr3	98902045	99018562	ENSG00000239462	2	1		lncRNA	97955
chr3	97720000	99000000	chr3	98521133	98585498	ENSG00000285635	1	-1		protein_coding	64365
chr3	97720000	99000000	chr3	96814581	97761532	ENSG00000080224	18	1	EPHA6	protein_coding	41532
chr3	109240000	111560000	chr3	109241507	109243125	ENSG00000239288	1	1	BRD7P7	processed_pseudogene	1618
chr3	109240000	111560000	chr3	109295239	109295498	ENSG00000277635	1	1	Metazoa_SRP	misc_RNA	259
chr3	109240000	111560000	chr3	109364047	109364234	ENSG00000241257	1	-1		processed_pseudogene	187
chr3	109240000	111560000	chr3	109409678	109410084	ENSG00000230618	3	-1	H3P12	processed_pseudogene	406
chr3	109240000	111560000	chr3	109396616	109397870	ENSG00000244561	1	1	C12orf29P2	processed_pseudogene	1254
chr3	109240000	111560000	chr3	109471329	109471812	ENSG00000244196	1	-1	PPIAP15	processed_pseudogene	483
chr3	109240000	111560000	chr3	109602828	109602897	ENSG00000265956	1	1	MIR4445	miRNA	69
chr3	109240000	111560000	chr3	109701456	109702218	ENSG00000271249	1	-1	DIMT1P1	processed_pseudogene	762
chr3	109240000	111560000	chr3	109915976	109916940	ENSG00000214380	4	-1	NFYBP1	processed_pseudogene	964
chr3	109240000	111560000	chr3	109977540	109977767	ENSG00000243945	1	-1	ZFAND2AP1	processed_pseudogene	227
chr3	109240000	111560000	chr3	110527482	110529582	ENSG00000240895	1	-1		lncRNA	2100
chr3	109240000	111560000	chr3	110551845	110551965	ENSG00000221206	1	-1	RNU6ATAC15P	snRNA	120
chr3	109240000	111560000	chr3	110682286	110683154	ENSG00000244722	1	-1	RPSAP29	processed_pseudogene	868
chr3	109240000	111560000	chr3	110727021	110727121	ENSG00000201426	1	1	Y_RNA	misc_RNA	100
chr3	109240000	111560000	chr3	111478737	111478943	ENSG00000244142	1	1	ATP6V0CP2	processed_pseudogene	206
chr3	109240000	111560000	chr3	109326144	109337546	ENSG00000121570	13	-1	DPPA4	protein_coding	11402
chr3	109240000	111560000	chr3	109337740	109382930	ENSG00000289358	1	1		lncRNA	45190
chr3	109240000	111560000	chr3	110966981	110969836	ENSG00000289069	1	-1		lncRNA	2855
chr3	109240000	111560000	chr3	111466313	111497095	ENSG00000239311	1	-1		lncRNA	30782
chr3	109240000	111560000	chr3	109409990	109723273	ENSG00000228980	4	1	LINC01205	lncRNA	313283
chr3	109240000	111560000	chr3	109293788	109316517	ENSG00000163530	4	-1	DPPA2	protein_coding	22729
chr3	109240000	111560000	chr3	109648107	109810861	ENSG00000242029	1	1		lncRNA	162754
chr3	109240000	111560000	chr3	110888384	111071553	ENSG00000242242	7	-1	NECTIN3-AS1	lncRNA	183169
chr3	109240000	111560000	chr3	111292719	111665750	ENSG00000153283	13	1	CD96	protein_coding	267281
chr3	109240000	111560000	chr3	111070071	111275563	ENSG00000177707	11	1	NECTIN3	protein_coding	205492
chr3	111680000	112080000	chr3	112030931	112031649	ENSG00000239439	1	-1	RFKP2	processed_pseudogene	718
chr3	111680000	112080000	chr3	111835723	111860730	ENSG00000286492	1	-1		lncRNA	25007
chr3	111680000	112080000	chr3	111979010	111993368	ENSG00000144827	9	1	ABHD10	protein_coding	14358
chr3	111680000	112080000	chr3	111998739	112013887	ENSG00000144834	14	1	TAGLN3	protein_coding	15148
chr3	111680000	112080000	chr3	112034736	112081269	ENSG00000176040	14	1	TMPRSS7	protein_coding	45264
chr3	111680000	112080000	chr3	111674676	111846447	ENSG00000240891	8	1	PLCXD2	protein_coding	166447
chr3	111680000	112080000	chr3	111732497	111976517	ENSG00000144824	21	1	PHLDB2	protein_coding	244020
chr3	114280000	115200000	chr3	114316475	114316569	ENSG00000284134	1	-1	MIR568	miRNA	94
chr3	114280000	115200000	chr3	114684580	114687609	ENSG00000241295	1	1	ZBTB20-AS2	lncRNA	3029
chr3	114280000	115200000	chr3	114743445	114743525	ENSG00000264623	3	-1	MIR4796	miRNA	80
chr3	114280000	115200000	chr3	114873114	114876514	ENSG00000239946	1	1	ZBTB20-AS3	lncRNA	3400
chr3	114280000	115200000	chr3	114930541	114931449	ENSG00000240002	1	1	YBX1P3	processed_pseudogene	908
chr3	114280000	115200000	chr3	115100423	115103061	ENSG00000242767	1	1	ZBTB20-AS4	lncRNA	2638
chr3	114280000	115200000	chr3	115147775	115148586	ENSG00000288896	2	1		lncRNA	811
chr3	114280000	115200000	chr3	114314501	114329714	ENSG00000259976	3	-1		lncRNA	15213
chr3	114280000	115200000	chr3	114351771	114388978	ENSG00000241560	7	1	ZBTB20-AS1	lncRNA	37207
chr3	114280000	115200000	chr3	114445521	114529452	ENSG00000242290	2	1	ZBTB20-AS5	lncRNA	83931
chr3	114280000	115200000	chr3	114314500	115147292	ENSG00000181722	18	-1	ZBTB20	protein_coding	832792
chr3	114280000	115200000	chr3	115147605	115564389	ENSG00000242880	2	1		lncRNA	52395
chr3	114280000	115200000	chr3	114276913	114310288	ENSG00000181847	12	1	TIGIT	protein_coding	30288
chr3	138040000	139360000	chr3	138101478	138102917	ENSG00000240668	1	-1	KRT8P36	processed_pseudogene	1439
chr3	138040000	139360000	chr3	138123713	138132390	ENSG00000118017	4	-1	A4GNT	protein_coding	8677
chr3	138040000	139360000	chr3	138125695	138125812	ENSG00000286396	1	-1		unprocessed_pseudogene	117
chr3	138040000	139360000	chr3	138482065	138485755	ENSG00000280399	1	1		TEC	3690
chr3	138040000	139360000	chr3	138643874	138644694	ENSG00000174715	7	-1	PPIAP72	processed_pseudogene	820
chr3	138040000	139360000	chr3	138777832	138778810	ENSG00000239207	2	1	GAPDHP39	processed_pseudogene	978
chr3	138040000	139360000	chr3	138796851	138797240	ENSG00000242321	1	1	RPL23AP40	processed_pseudogene	389
chr3	138040000	139360000	chr3	138825063	138826329	ENSG00000241429	1	1	EEF1A1P25	processed_pseudogene	1266
chr3	138040000	139360000	chr3	138889255	138889957	ENSG00000242244	1	-1	ATP5MC1P3	processed_pseudogene	702
chr3	138040000	139360000	chr3	138944224	138947137	ENSG00000183770	7	-1	FOXL2	protein_coding	2913
chr3	138040000	139360000	chr3	139003962	139006268	ENSG00000206260	4	-1	PRR23A	protein_coding	2306
chr3	138040000	139360000	chr3	139019031	139020926	ENSG00000184814	5	-1	PRR23B	protein_coding	1895
chr3	138040000	139360000	chr3	139042102	139044892	ENSG00000233701	3	-1	PRR23C	protein_coding	2790
chr3	138040000	139360000	chr3	139081654	139082377	ENSG00000251137	1	-1	RPL7L1P7	processed_pseudogene	723
chr3	138040000	139360000	chr3	139232992	139233522	ENSG00000281473	1	1	PISRT1	lncRNA	530
chr3	138040000	139360000	chr3	139233414	139233520	ENSG00000276304	1	1		misc_RNA	106
chr3	138040000	139360000	chr3	139349024	139349371	ENSG00000272656	1	-1		lncRNA	347
chr3	138040000	139360000	chr3	138061990	138115818	ENSG00000158163	15	-1	DZIP1L	protein_coding	53828
chr3	138040000	139360000	chr3	138160988	138174949	ENSG00000138231	14	-1	DBR1	protein_coding	13961
chr3	138040000	139360000	chr3	138347648	138405534	ENSG00000158186	13	1	MRAS	protein_coding	57886
chr3	138040000	139360000	chr3	138434586	138481686	ENSG00000158220	14	1	ESYT3	protein_coding	47100
chr3	138040000	139360000	chr3	138608606	138633376	ENSG00000158234	13	1	FAIM	protein_coding	24770
chr3	138040000	139360000	chr3	138947217	138953990	ENSG00000206262	9	1	FOXL2NB	protein_coding	6773
chr3	138040000	139360000	chr3	139104185	139125171	ENSG00000232416	3	1	BPESC1	lncRNA	20986
chr3	138040000	139360000	chr3	139353946	139389736	ENSG00000184432	11	-1	COPB2	protein_coding	6054
chr3	138040000	139360000	chr3	138187248	138298384	ENSG00000114098	18	1	ARMC8	protein_coding	111136
chr3	138040000	139360000	chr3	138261437	138329886	ENSG00000181322	15	-1	NME9	protein_coding	68449
chr3	138040000	139360000	chr3	138494344	138594538	ENSG00000114107	9	-1	CEP70	protein_coding	100194
chr3	138040000	139360000	chr3	138652698	138834928	ENSG00000051382	9	-1	PIK3CB	protein_coding	182230
chr3	138040000	139360000	chr3	138935189	138944020	ENSG00000244578	1	-1	LINC01391	lncRNA	8831
chr3	138040000	139360000	chr3	139316157	139340870	ENSG00000286988	1	-1		lncRNA	24713
chr3	138040000	139360000	chr3	139005806	139360497	ENSG00000175110	14	1	MRPS22	protein_coding	354194
chr3	149480000	149800000	chr3	149494660	149495995	ENSG00000244503	1	1	EEF1A1P45	processed_pseudogene	1335
chr3	149480000	149800000	chr3	149525631	149525726	ENSG00000252581	1	1	RNU6-1098P	snRNA	95
chr3	149480000	149800000	chr3	149648997	149650184	ENSG00000241985	1	-1	WWTR1-IT1	lncRNA	1187
chr3	149480000	149800000	chr3	149656999	149661364	ENSG00000241313	3	1	WWTR1-AS1	lncRNA	4365
chr3	149480000	149800000	chr3	149779009	149779108	ENSG00000251854	1	-1	RNU6-507P	snRNA	99
chr3	149480000	149800000	chr3	149474697	149503394	ENSG00000169903	7	1	TM4SF4	protein_coding	23394
chr3	149480000	149800000	chr3	149738472	149752495	ENSG00000114744	9	-1	COMMD2	protein_coding	14023
chr3	149480000	149800000	chr3	149517235	149736714	ENSG00000018408	15	-1	WWTR1	protein_coding	219479
chr3	149480000	149800000	chr3	149761100	149968385	ENSG00000206199	11	-1	ANKUB1	protein_coding	38900
chr3	152000000	152960000	chr3	152339695	152340990	ENSG00000221962	5	-1	TMEM14EP	transcribed_processed_pseudogene	1295
chr3	152000000	152960000	chr3	152449272	152449384	ENSG00000201217	1	1	Y_RNA	misc_RNA	112
chr3	152000000	152960000	chr3	152800434	152800732	ENSG00000242561	1	-1	ATP5MGP5	processed_pseudogene	298
chr3	152000000	152960000	chr3	152835131	152841439	ENSG00000169860	7	1	P2RY1	protein_coding	6308
chr3	152000000	152960000	chr3	152118173	152151724	ENSG00000239941	1	-1	LINC02917	lncRNA	33551
chr3	152000000	152960000	chr3	152245262	152269590	ENSG00000229619	6	-1	MBNL1-AS1	lncRNA	24328
chr3	152000000	152960000	chr3	152457759	152496813	ENSG00000243305	1	-1		lncRNA	39054
chr3	152000000	152960000	chr3	152648146	152650447	ENSG00000244545	1	1		lncRNA	2301
chr3	152000000	152960000	chr3	152650478	152679450	ENSG00000287706	3	1		lncRNA	28972
chr3	152000000	152960000	chr3	152243828	152465780	ENSG00000152601	18	1	MBNL1	protein_coding	221952
chr3	152000000	152960000	chr3	152159528	152205461	ENSG00000289315	2	-1		lncRNA	45933
chr3	176480000	178400000	chr3	176515103	176515151	ENSG00000283333	1	1	MIR7977	miRNA	48
chr3	176480000	178400000	chr3	176763233	176763341	ENSG00000252302	1	1	RNA5SP147	rRNA_pseudogene	108
chr3	176480000	178400000	chr3	177010719	177011067	ENSG00000231888	1	-1	MTND5P15	processed_pseudogene	348
chr3	176480000	178400000	chr3	177120691	177120800	ENSG00000201343	1	-1	Y_RNA	misc_RNA	109
chr3	176480000	178400000	chr3	177126017	177126120	ENSG00000200882	1	-1	RNU6-681P	snRNA	103
chr3	176480000	178400000	chr3	177297161	177298386	ENSG00000236893	1	-1	ASS1P7	processed_pseudogene	1225
chr3	176480000	178400000	chr3	177503303	177503552	ENSG00000252028	1	-1	RN7SKP52	misc_RNA	249
chr3	176480000	178400000	chr3	177621382	177628287	ENSG00000236385	1	-1		lncRNA	6905
chr3	176480000	178400000	chr3	177624282	177624409	ENSG00000200288	1	-1		snoRNA	127
chr3	176480000	178400000	chr3	177930758	177940299	ENSG00000225790	3	1		lncRNA	9541
chr3	176480000	178400000	chr3	177952327	177959817	ENSG00000270321	2	-1		lncRNA	7490
chr3	176480000	178400000	chr3	178007672	178007779	ENSG00000199858	1	-1	RNU6-1120P	snRNA	107
chr3	176480000	178400000	chr3	177037405	177047923	ENSG00000231310	3	1	TBL1XR1-AS1	lncRNA	10518
chr3	176480000	178400000	chr3	177294442	177323418	ENSG00000203645	2	1	LINC00501	lncRNA	28976
chr3	176480000	178400000	chr3	177683627	177691250	ENSG00000228561	2	1		lncRNA	7623
chr3	176480000	178400000	chr3	177700346	177701072	ENSG00000277241	1	-1	FGFR3P4	processed_pseudogene	726
chr3	176480000	178400000	chr3	176415439	176867838	ENSG00000223715	3	-1	LINC01208	lncRNA	387838
chr3	176480000	178400000	chr3	176814155	176817001	ENSG00000228308	2	-1	LINC01209	lncRNA	2846
chr3	176480000	178400000	chr3	177441910	177767379	ENSG00000228221	6	1	LINC00578	lncRNA	325469
chr3	176480000	178400000	chr3	178028130	178172449	ENSG00000286003	1	-1		lncRNA	144319
chr3	176480000	178400000	chr3	177816865	177899224	ENSG00000231574	7	1	LINC02015	lncRNA	82359
chr3	176480000	178400000	chr3	177337628	177349166	ENSG00000226782	2	-1		lncRNA	11538
chr3	176480000	178400000	chr3	178272932	178844429	ENSG00000197584	13	1	KCNMB2	protein_coding	127068
chr3	176480000	178400000	chr3	178164008	178385479	ENSG00000223930	9	-1		lncRNA	221471
chr3	176480000	178400000	chr3	177019340	177228000	ENSG00000177565	19	-1	TBL1XR1	protein_coding	208660
chr3	185640000	185920000	chr3	185767847	185767904	ENSG00000265470	1	-1	MIR548AQ	miRNA	57
chr3	185640000	185920000	chr3	185914558	185938103	ENSG00000136527	19	-1	TRA2B	protein_coding	5442
chr3	185640000	185920000	chr3	185712528	185729787	ENSG00000163915	7	1	IGF2BP2-AS1	lncRNA	17259
chr3	185640000	185920000	chr3	185643130	185825042	ENSG00000073792	16	-1	IGF2BP2	protein_coding	181912
chr4	10560000	12720000	chr4	10685003	10697661	ENSG00000249334	1	1		lncRNA	12658
chr4	10560000	12720000	chr4	11368827	11368921	ENSG00000207716	1	1	MIR572	miRNA	94
chr4	10560000	12720000	chr4	11371975	11372892	ENSG00000250896	1	1	RNPS1P1	processed_pseudogene	917
chr4	10560000	12720000	chr4	11414051	11414160	ENSG00000222182	1	-1	RNA5SP156	rRNA_pseudogene	109
chr4	10560000	12720000	chr4	11469250	11478196	ENSG00000251152	1	1		lncRNA	8946
chr4	10560000	12720000	chr4	11914667	11919688	ENSG00000248262	1	1		lncRNA	5021
chr4	10560000	12720000	chr4	12312588	12312690	ENSG00000212282	1	1	RNU6-578P	snRNA	102
chr4	10560000	12720000	chr4	12640298	12640637	ENSG00000249780	1	-1		processed_pseudogene	339
chr4	10560000	12720000	chr4	12639086	12641009	ENSG00000249995	1	1	ECM1P2	processed_pseudogene	1923
chr4	10560000	12720000	chr4	11426874	11467802	ENSG00000287778	2	1		lncRNA	40928
chr4	10560000	12720000	chr4	11740948	11769468	ENSG00000248300	1	-1	LINC02360	lncRNA	28520
chr4	10560000	12720000	chr4	12223445	12251286	ENSG00000251210	6	1	LINC02270	lncRNA	27841
chr4	10560000	12720000	chr4	10737558	10749586	ENSG00000283083	2	1	LINC02498	lncRNA	12028
chr4	10560000	12720000	chr4	11393150	11429564	ENSG00000002587	10	-1	HS3ST1	protein_coding	36414
chr4	10560000	12720000	chr4	10486395	10684768	ENSG00000109684	16	-1	CLNK	protein_coding	124768
chr4	10560000	12720000	chr4	11625651	11823906	ENSG00000249631	7	1		lncRNA	198255
chr4	30280000	32840000	chr4	30717369	30718929	ENSG00000288940	1	1		lncRNA	1560
chr4	30280000	32840000	chr4	30884443	30885182	ENSG00000250624	1	-1	MTCYBP43	unprocessed_pseudogene	739
chr4	30280000	32840000	chr4	31350284	31351725	ENSG00000251434	1	1		lncRNA	1441
chr4	30280000	32840000	chr4	32351038	32353220	ENSG00000251329	1	1	LINC02353	lncRNA	2182
chr4	30280000	32840000	chr4	30718805	30721970	ENSG00000286596	1	-1		lncRNA	3165
chr4	30280000	32840000	chr4	30776257	30793970	ENSG00000249678	1	-1		lncRNA	17713
chr4	30280000	32840000	chr4	31506422	31558831	ENSG00000249882	2	1	LINC02501	lncRNA	52409
chr4	30280000	32840000	chr4	32005076	32022483	ENSG00000286212	2	-1		lncRNA	17407
chr4	30280000	32840000	chr4	31171013	31211678	ENSG00000251182	2	1	LINC02497	lncRNA	40665
chr4	30280000	32840000	chr4	30720369	31146805	ENSG00000169851	16	1	PCDH7	protein_coding	426436
chr4	30280000	32840000	chr4	31997376	32228543	ENSG00000251129	3	1	LINC02506	lncRNA	231167
chr4	30280000	32840000	chr4	32583855	32745525	ENSG00000286784	1	-1		lncRNA	161670
chr4	74160000	74680000	chr4	74308470	74316789	ENSG00000182585	10	1	EPGN	protein_coding	8319
chr4	74160000	74680000	chr4	74365145	74388749	ENSG00000124882	4	1	EREG	protein_coding	23604
chr4	74160000	74680000	chr4	74418917	74440457	ENSG00000250532	1	-1		lncRNA	21540
chr4	74160000	74680000	chr4	74114174	74303099	ENSG00000163738	19	1	MTHFD2L	protein_coding	143099
chr4	74160000	74680000	chr4	74552584	74589481	ENSG00000249942	1	-1		lncRNA	36897
chr4	74160000	74680000	chr4	74445136	74455005	ENSG00000109321	11	1	AREG	protein_coding	9869
chr4	99960000	102320000	chr4	99990737	99991477	ENSG00000250403	1	-1		processed_pseudogene	740
chr4	99960000	102320000	chr4	100041841	100042104	ENSG00000248820	2	-1	DYNLL1P6	processed_pseudogene	263
chr4	99960000	102320000	chr4	100778582	100791426	ENSG00000251219	2	-1	LINC01217	lncRNA	12844
chr4	99960000	102320000	chr4	100812255	100814280	ENSG00000251636	1	-1	LINC01218	lncRNA	2025
chr4	99960000	102320000	chr4	101240795	101240872	ENSG00000273882	1	-1	MIR8066	miRNA	77
chr4	99960000	102320000	chr4	101330302	101330414	ENSG00000221265	1	-1	MIR1255A	miRNA	112
chr4	99960000	102320000	chr4	101347752	101349436	ENSG00000254531	3	1	FLJ20021	lncRNA	1684
chr4	99960000	102320000	chr4	101723876	101723980	ENSG00000199529	1	1	RNU6-462P	snRNA	104
chr4	99960000	102320000	chr4	101972423	101972798	ENSG00000251149	1	1	MTND5P5	processed_pseudogene	375
chr4	99960000	102320000	chr4	100185870	100190782	ENSG00000145358	6	-1	DDIT4L	protein_coding	4912
chr4	99960000	102320000	chr4	100190033	100215505	ENSG00000249710	1	1	DDIT4L-AS1	lncRNA	25472
chr4	99960000	102320000	chr4	100421655	100474461	ENSG00000286150	1	1		lncRNA	52806
chr4	99960000	102320000	chr4	101640946	101649974	ENSG00000286124	1	-1		lncRNA	9028
chr4	99960000	102320000	chr4	101976894	102036903	ENSG00000251309	1	-1		lncRNA	60009
chr4	99960000	102320000	chr4	99950006	100195099	ENSG00000245322	8	1	H2AZ1-DT	lncRNA	235099
chr4	99960000	102320000	chr4	101023409	101348278	ENSG00000138814	17	-1	PPP3CA	protein_coding	324869
chr4	99960000	102320000	chr4	102251080	102431258	ENSG00000138821	14	-1	SLC39A8	protein_coding	68920
chr4	99960000	102320000	chr4	101411286	102074812	ENSG00000153064	12	1	BANK1	protein_coding	663526
chr4	99960000	102320000	chr4	100660279	100675113	ENSG00000250223	1	-1	LINC01216	lncRNA	14834
chr4	99960000	102320000	chr4	100395341	100880126	ENSG00000164035	10	-1	EMCN	protein_coding	484785
chr4	103120000	103960000	chr4	103550586	103559277	ENSG00000250920	3	-1		lncRNA	8691
chr4	103120000	103960000	chr4	103572089	103574082	ENSG00000251571	1	1	DDX3P3	processed_pseudogene	1993
chr4	103120000	103960000	chr4	103924540	103924641	ENSG00000252460	1	1	RNU6-635P	snRNA	101
chr4	103120000	103960000	chr4	103548745	103624534	ENSG00000251577	5	1	TACR3-AS1	lncRNA	75789
chr4	103120000	103960000	chr4	103871890	103878436	ENSG00000286291	1	1		lncRNA	6546
chr4	103120000	103960000	chr4	103586031	103719985	ENSG00000169836	5	-1	TACR3	protein_coding	133954
chr4	103120000	103960000	chr4	103105349	103198445	ENSG00000138778	14	-1	CENPE	protein_coding	78445
chr4	103120000	103960000	chr4	103255822	103454667	ENSG00000248740	8	1	LINC02428	lncRNA	198845
chr4	112080000	112960000	chr4	112116510	112116903	ENSG00000240459	2	-1		processed_pseudogene	393
chr4	112080000	112960000	chr4	112171215	112171527	ENSG00000243280	2	1	RPL36AP19	processed_pseudogene	312
chr4	112080000	112960000	chr4	112455924	112457785	ENSG00000248697	1	1	TOX4P1	processed_pseudogene	1861
chr4	112080000	112960000	chr4	112513516	112516180	ENSG00000178403	4	-1	NEUROG2	protein_coding	2664
chr4	112080000	112960000	chr4	112530371	112530672	ENSG00000248439	2	-1	RPL23AP94	processed_pseudogene	301
chr4	112080000	112960000	chr4	112564988	112565398	ENSG00000250966	2	1	H3P14	processed_pseudogene	410
chr4	112080000	112960000	chr4	112647874	112647941	ENSG00000199169	1	-1	MIR367	miRNA	67
chr4	112080000	112960000	chr4	112648004	112648071	ENSG00000199145	1	-1	MIR302D	miRNA	67
chr4	112080000	112960000	chr4	112648183	112648251	ENSG00000207927	1	-1	MIR302A	miRNA	68
chr4	112080000	112960000	chr4	112648363	112648430	ENSG00000199102	1	-1	MIR302C	miRNA	67
chr4	112080000	112960000	chr4	112648485	112648557	ENSG00000284463	1	-1	MIR302B	miRNA	72
chr4	112080000	112960000	chr4	112646476	112650051	ENSG00000249532	6	-1	MIR302CHG	lncRNA	3575
chr4	112080000	112960000	chr4	112685055	112685503	ENSG00000220924	4	1	OSTCP4	processed_pseudogene	448
chr4	112080000	112960000	chr4	112693459	112693792	ENSG00000248633	1	-1	GET1P1	transcribed_processed_pseudogene	333
chr4	112080000	112960000	chr4	112738672	112739106	ENSG00000241002	1	1	RPL32P13	processed_pseudogene	434
chr4	112080000	112960000	chr4	112755816	112755917	ENSG00000202536	2	-1	Y_RNA	misc_RNA	101
chr4	112080000	112960000	chr4	112788083	112788878	ENSG00000241741	1	-1	RPL7AP30	processed_pseudogene	795
chr4	112080000	112960000	chr4	112797050	112798691	ENSG00000250500	1	-1		processed_pseudogene	1641
chr4	112080000	112960000	chr4	112826307	112827607	ENSG00000234841	4	1		processed_pseudogene	1300
chr4	112080000	112960000	chr4	112880298	112882330	ENSG00000251126	2	-1		lncRNA	2032
chr4	112080000	112960000	chr4	112881718	112882132	ENSG00000228814	4	-1		transcribed_processed_pseudogene	414
chr4	112080000	112960000	chr4	112145454	112195256	ENSG00000174749	6	1	FAM241A	protein_coding	49802
chr4	112080000	112960000	chr4	112229561	112231596	ENSG00000260526	1	-1	AP1AR-DT	lncRNA	2035
chr4	112080000	112960000	chr4	112231740	112273110	ENSG00000138660	12	1	AP1AR	protein_coding	41370
chr4	112080000	112960000	chr4	112272968	112285955	ENSG00000145365	12	-1	TIFA	protein_coding	12987
chr4	112080000	112960000	chr4	112356135	112370959	ENSG00000251441	3	1	RTEL1P1	transcribed_processed_pseudogene	14824
chr4	112080000	112960000	chr4	112515385	112546881	ENSG00000249509	1	1	NEUROG2-AS1	lncRNA	31496
chr4	112080000	112960000	chr4	112693047	112706810	ENSG00000250046	3	-1		lncRNA	13763
chr4	112080000	112960000	chr4	112637077	112657696	ENSG00000174720	18	1	LARP7	protein_coding	20619
chr4	112080000	112960000	chr4	111804418	112112273	ENSG00000249815	2	-1	LINC02945	lncRNA	32273
chr4	112080000	112960000	chr4	112539333	112636995	ENSG00000138658	16	-1	ZGRF1	protein_coding	97662
chr4	112080000	112960000	chr4	112285509	112442621	ENSG00000073331	18	1	ALPK1	protein_coding	157112
chr4	112080000	112960000	chr4	112818032	113384221	ENSG00000145362	21	1	ANK2	protein_coding	141968
chr4	168160000	168920000	chr4	168471409	168471539	ENSG00000207171	1	1		snoRNA	130
chr4	168160000	168920000	chr4	168598240	168598757	ENSG00000229226	3	-1	BTF3L4P4	processed_pseudogene	517
chr4	168160000	168920000	chr4	168647896	168648587	ENSG00000249623	1	-1	PALLD-AS1	lncRNA	691
chr4	168160000	168920000	chr4	168686608	168686716	ENSG00000206613	1	-1	RNU6-1336P	snRNA	108
chr4	168160000	168920000	chr4	168755816	168756382	ENSG00000214676	4	1	RPL9P16	processed_pseudogene	566
chr4	168160000	168920000	chr4	168828919	168832937	ENSG00000249609	1	-1		lncRNA	4018
chr4	168160000	168920000	chr4	168843988	168844735	ENSG00000279384	1	1		TEC	747
chr4	168160000	168920000	chr4	168885355	168885461	ENSG00000201176	1	1	RNU6-853P	snRNA	106
chr4	168160000	168920000	chr4	168170097	168194861	ENSG00000287188	1	-1		lncRNA	24764
chr4	168160000	168920000	chr4	168092537	168187736	ENSG00000109511	12	1	ANXA10	protein_coding	27736
chr4	168160000	168920000	chr4	168216291	168318883	ENSG00000137628	18	-1	DDX60	protein_coding	102592
chr4	168160000	168920000	chr4	168356735	168537786	ENSG00000181381	15	-1	DDX60L	protein_coding	181051
chr4	168160000	168920000	chr4	168863770	169010275	ENSG00000145439	12	-1	CBR4	protein_coding	56230
chr4	168160000	168920000	chr4	168497052	168928457	ENSG00000129116	20	1	PALLD	protein_coding	422948
chr4	186200000	190214555	chr4	186328716	186329601	ENSG00000213332	4	-1	SLC25A5P6	processed_pseudogene	885
chr4	186200000	190214555	chr4	186501109	186501215	ENSG00000212387	1	1	RNU6-1055P	snRNA	106
chr4	186200000	190214555	chr4	186701579	186704086	ENSG00000287169	1	1		lncRNA	2507
chr4	186200000	190214555	chr4	186892552	186892983	ENSG00000272218	1	1		lncRNA	431
chr4	186200000	190214555	chr4	186900540	186900838	ENSG00000249539	1	1	MRPS36P2	processed_pseudogene	298
chr4	186200000	190214555	chr4	187198218	187201894	ENSG00000287571	1	-1		lncRNA	3676
chr4	186200000	190214555	chr4	187304083	187309682	ENSG00000250658	1	-1		lncRNA	5599
chr4	186200000	190214555	chr4	187370648	187371921	ENSG00000250042	1	1	LINC02514	lncRNA	1273
chr4	186200000	190214555	chr4	187408232	187415748	ENSG00000250620	2	1	LINC02515	lncRNA	7516
chr4	186200000	190214555	chr4	187441677	187444298	ENSG00000251643	1	-1		processed_pseudogene	2621
chr4	186200000	190214555	chr4	187516153	187517208	ENSG00000251490	1	-1		lncRNA	1055
chr4	186200000	190214555	chr4	187746094	187748199	ENSG00000249162	1	-1	ADAM20P3	processed_pseudogene	2105
chr4	186200000	190214555	chr4	187970273	187971284	ENSG00000213331	4	1		processed_pseudogene	1011
chr4	186200000	190214555	chr4	187995771	188005046	ENSG00000179059	10	1	ZFP42	protein_coding	9275
chr4	186200000	190214555	chr4	188106558	188106914	ENSG00000241011	1	1		processed_pseudogene	356
chr4	186200000	190214555	chr4	188121531	188121634	ENSG00000201085	1	-1	RNU6-173P	snRNA	103
chr4	186200000	190214555	chr4	188139441	188147743	ENSG00000184108	8	1	TRIML1	protein_coding	8302
chr4	186200000	190214555	chr4	188140822	188143379	ENSG00000247130	2	-1		lncRNA	2557
chr4	186200000	190214555	chr4	188159705	188161157	ENSG00000248370	2	1	LINC02434	lncRNA	1452
chr4	186200000	190214555	chr4	188349376	188350024	ENSG00000242169	2	-1	RPL7AP27	processed_pseudogene	648
chr4	186200000	190214555	chr4	188387471	188389666	ENSG00000248880	1	-1	ICE2P1	processed_pseudogene	2195
chr4	186200000	190214555	chr4	188630924	188631747	ENSG00000250523	1	1		processed_pseudogene	823
chr4	186200000	190214555	chr4	188713644	188715442	ENSG00000275826	1	1		processed_pseudogene	1798
chr4	186200000	190214555	chr4	188716665	188716725	ENSG00000252275	1	-1	RNU7-192P	snRNA	60
chr4	186200000	190214555	chr4	188740507	188741281	ENSG00000278974	1	-1		TEC	774
chr4	186200000	190214555	chr4	188738373	188739494	ENSG00000180015	12	1		processed_pseudogene	1121
chr4	186200000	190214555	chr4	188776657	188785511	ENSG00000251619	1	1	LINC02508	lncRNA	8854
chr4	186200000	190214555	chr4	188990715	189002075	ENSG00000250024	1	-1		lncRNA	11360
chr4	186200000	190214555	chr4	189288677	189291336	ENSG00000249877	1	-1		lncRNA	2659
chr4	186200000	190214555	chr4	189472965	189475192	ENSG00000205100	2	1	HSP90AA4P	transcribed_processed_pseudogene	2227
chr4	186200000	190214555	chr4	189703881	189704490	ENSG00000272566	1	-1		lncRNA	609
chr4	186200000	190214555	chr4	189709539	189709714	ENSG00000202215	1	-1	RNU1-51P	snRNA	175
chr4	186200000	190214555	chr4	189881515	189884868	ENSG00000250666	1	1	LINC01596	lncRNA	3353
chr4	186200000	190214555	chr4	189973599	189973847	ENSG00000249462	1	-1	MLLT10P2	processed_pseudogene	248
chr4	186200000	190214555	chr4	189979902	189982379	ENSG00000271307	3	1		processed_pseudogene	2477
chr4	186200000	190214555	chr4	189982523	189984871	ENSG00000251297	1	-1	TUBB7P	unprocessed_pseudogene	2348
chr4	186200000	190214555	chr4	190015138	190015255	ENSG00000199572	1	1	RNA5SP174	rRNA_pseudogene	117
chr4	186200000	190214555	chr4	190017696	190017814	ENSG00000201145	1	1	RNA5SP175	rRNA_pseudogene	118
chr4	186200000	190214555	chr4	190024367	190027257	ENSG00000205097	7	-1	FRG2	protein_coding	2890
chr4	186200000	190214555	chr4	190041342	190043414	ENSG00000214273	4	1	AGGF1P1	processed_pseudogene	2072
chr4	186200000	190214555	chr4	190057902	190063005	ENSG00000249003	1	-1	CLUHP4	unprocessed_pseudogene	5103
chr4	186200000	190214555	chr4	190064502	190067864	ENSG00000281591	1	1	DBET	lncRNA	3362
chr4	186200000	190214555	chr4	190065233	190065914	ENSG00000277162	1	1		unprocessed_pseudogene	681
chr4	186200000	190214555	chr4	190067935	190069209	ENSG00000281720	1	1	DUX4L8	unprocessed_pseudogene	1274
chr4	186200000	190214555	chr4	190071232	190072506	ENSG00000281652	1	1	DUX4L7	unprocessed_pseudogene	1274
chr4	186200000	190214555	chr4	190074525	190075799	ENSG00000281058	1	1	DUX4L6	unprocessed_pseudogene	1274
chr4	186200000	190214555	chr4	190077818	190079092	ENSG00000280799	1	1	DUX4L5	unprocessed_pseudogene	1274
chr4	186200000	190214555	chr4	190081118	190082386	ENSG00000258834	4	1	DUX4L4	unprocessed_pseudogene	1268
chr4	186200000	190214555	chr4	190084412	190085686	ENSG00000280757	1	1	DUX4L1	unprocessed_pseudogene	1274
chr4	186200000	190214555	chr4	190087705	190088979	ENSG00000281627	1	1	DUX4L3	unprocessed_pseudogene	1274
chr4	186200000	190214555	chr4	190091005	190092279	ENSG00000280457	1	1	DUX4L2	unprocessed_pseudogene	1274
chr4	186200000	190214555	chr4	190195727	190196190	ENSG00000261914	2	1	RPL23AP84	processed_pseudogene	463
chr4	186200000	190214555	chr4	190195738	190195978	ENSG00000282994	1	-1		processed_pseudogene	240
chr4	186200000	190214555	chr4	186191567	186213463	ENSG00000145476	16	1	CYP4V2	protein_coding	13463
chr4	186200000	190214555	chr4	186326302	186336662	ENSG00000287667	1	1		lncRNA	10360
chr4	186200000	190214555	chr4	186266189	186289681	ENSG00000088926	15	1	F11	protein_coding	23492
chr4	186200000	190214555	chr4	186526792	186555567	ENSG00000168412	7	-1	MTNR1A	protein_coding	28775
chr4	186200000	190214555	chr4	186890969	186892366	ENSG00000250829	2	1		lncRNA	1397
chr4	186200000	190214555	chr4	186979490	187027451	ENSG00000249742	2	-1		lncRNA	47961
chr4	186200000	190214555	chr4	187201986	187209346	ENSG00000249747	1	1	LINC02374	lncRNA	7360
chr4	186200000	190214555	chr4	188091272	188109603	ENSG00000179046	9	-1	TRIML2	protein_coding	18331
chr4	186200000	190214555	chr4	188434552	188455537	ENSG00000289879	1	-1		lncRNA	20985
chr4	186200000	190214555	chr4	188777672	188818522	ENSG00000250626	3	-1		lncRNA	40850
chr4	186200000	190214555	chr4	188757678	188779343	ENSG00000249269	2	1		lncRNA	21665
chr4	186200000	190214555	chr4	189193100	189204877	ENSG00000251310	1	1		lncRNA	11777
chr4	186200000	190214555	chr4	189940870	189963202	ENSG00000109536	12	1	FRG1	protein_coding	22332
chr4	186200000	190214555	chr4	190021407	190022665	ENSG00000224807	5	-1	DUX4L9	unprocessed_pseudogene	1258
chr4	186200000	190214555	chr4	190037916	190038399	ENSG00000250053	1	-1	RARRES2P4	processed_pseudogene	483
chr4	186200000	190214555	chr4	186286094	186500997	ENSG00000251165	6	-1	F11-AS1	lncRNA	214903
chr4	186200000	190214555	chr4	186426546	186555328	ENSG00000272297	2	-1		protein_coding	128782
chr4	186200000	190214555	chr4	186208979	186258469	ENSG00000290316	1	1		protein_coding	49490
chr4	186200000	190214555	chr4	186226438	186258471	ENSG00000164344	17	1	KLKB1	protein_coding	32033
chr4	186200000	190214555	chr4	187532873	187672755	ENSG00000250590	6	-1	LINC02492	lncRNA	139882
chr4	186200000	190214555	chr4	187005944	187060930	ENSG00000250971	3	1		lncRNA	54986
chr4	186200000	190214555	chr4	187942164	187963345	ENSG00000286641	1	-1		lncRNA	21181
chr4	186200000	190214555	chr4	188400736	188681051	ENSG00000249378	8	1	LINC01060	lncRNA	280315
chr4	186200000	190214555	chr4	189659605	189661486	ENSG00000250739	1	1	LINC01262	lncRNA	1881
chr4	186200000	190214555	chr4	190173774	190185942	ENSG00000260596	5	1	DUX4	protein_coding	12168
chr4	186200000	190214555	chr4	187613708	187712329	ENSG00000249642	2	1		lncRNA	98621
chr4	186200000	190214555	chr4	186587794	186726722	ENSG00000083857	15	-1	FAT1	protein_coding	138928
chr4	186200000	190214555	chr4	189764391	189940733	ENSG00000245685	9	-1	FRG1-DT	lncRNA	176342
chr5	44840000	46440000	chr5	45226286	45228428	ENSG00000287540	1	1		lncRNA	2142
chr5	44840000	46440000	chr5	45557919	45559986	ENSG00000250422	1	1		processed_pseudogene	2067
chr5	44840000	46440000	chr5	45574590	45576612	ENSG00000250017	1	1		processed_pseudogene	2022
chr5	44840000	46440000	chr5	45890216	45895970	ENSG00000250122	1	1		lncRNA	5754
chr5	44840000	46440000	chr5	45254948	45696498	ENSG00000164588	8	-1	HCN1	protein_coding	441550
chr5	44840000	46440000	chr5	45035199	45098647	ENSG00000248148	1	1		lncRNA	63448
chr5	90840000	91440000	chr5	91030990	91031307	ENSG00000249514	1	-1	LYSETP1	processed_pseudogene	317
chr5	90840000	91440000	chr5	91132303	91142470	ENSG00000285618	1	-1		lncRNA	10167
chr5	90840000	91440000	chr5	91223419	91223967	ENSG00000212930	3	1		lncRNA	548
chr5	90840000	91440000	chr5	91226475	91227071	ENSG00000251093	1	-1		lncRNA	596
chr5	90840000	91440000	chr5	91270727	91270867	ENSG00000199643	1	1	RNU4-90P	snRNA	140
chr5	90840000	91440000	chr5	91280097	91281142	ENSG00000234292	3	-1		lncRNA	1045
chr5	90840000	91440000	chr5	91280229	91282713	ENSG00000286638	2	1		lncRNA	2484
chr5	90840000	91440000	chr5	91314716	91314997	ENSG00000277001	1	-1	Metazoa_SRP	misc_RNA	281
chr5	90840000	91440000	chr5	91354478	91354934	ENSG00000240388	2	1		processed_pseudogene	456
chr5	90840000	91440000	chr5	91355380	91356026	ENSG00000241059	2	1		lncRNA	646
chr5	90840000	91440000	chr5	91368631	91383317	ENSG00000113369	9	-1	ARRDC3	protein_coding	14686
chr5	90840000	91440000	chr5	90529344	91164437	ENSG00000164199	18	1	ADGRV1	protein_coding	324437
chr5	90840000	91440000	chr5	91380349	91616105	ENSG00000281357	5	1	ARRDC3-AS1	lncRNA	59651
chr5	90840000	91440000	chr5	91054834	91314547	ENSG00000248323	8	-1	LUCAT1	lncRNA	259713
chr5	91440000	94920000	chr5	91476382	91477018	ENSG00000251356	1	1	RAB5CP2	processed_pseudogene	636
chr5	91440000	94920000	chr5	91843687	91844529	ENSG00000248826	2	-1	PCBP2P3	processed_pseudogene	842
chr5	91440000	94920000	chr5	91844022	91844116	ENSG00000276426	1	-1		misc_RNA	94
chr5	91440000	94920000	chr5	92840807	92841628	ENSG00000248950	1	-1	LDHBP3	processed_pseudogene	821
chr5	91440000	94920000	chr5	92889387	92890840	ENSG00000249958	1	-1	CCT7P2	processed_pseudogene	1453
chr5	91440000	94920000	chr5	93088856	93091768	ENSG00000286509	1	1		lncRNA	2912
chr5	91440000	94920000	chr5	93267429	93268425	ENSG00000213730	3	1	POLD2P1	processed_pseudogene	996
chr5	91440000	94920000	chr5	93598593	93600214	ENSG00000289274	1	1		lncRNA	1621
chr5	91440000	94920000	chr5	93620696	93620788	ENSG00000284336	1	-1	MIR2277	miRNA	92
chr5	91440000	94920000	chr5	93682838	93683667	ENSG00000249353	2	-1	NPM1P27	processed_pseudogene	829
chr5	91440000	94920000	chr5	93733220	93741600	ENSG00000248483	7	-1	POU5F2	protein_coding	8380
chr5	91440000	94920000	chr5	93741640	93743500	ENSG00000272406	1	1		lncRNA	1860
chr5	91440000	94920000	chr5	93860669	93863825	ENSG00000251023	1	-1		lncRNA	3156
chr5	91440000	94920000	chr5	94568929	94569470	ENSG00000254132	1	-1	MTND6P3	processed_pseudogene	541
chr5	91440000	94920000	chr5	94569540	94570676	ENSG00000251340	1	1	MTCYBP35	processed_pseudogene	1136
chr5	91440000	94920000	chr5	94592771	94594791	ENSG00000232578	4	1		processed_pseudogene	2020
chr5	91440000	94920000	chr5	94788789	94793599	ENSG00000249175	1	1		lncRNA	4810
chr5	91440000	94920000	chr5	94825961	94826694	ENSG00000243806	1	-1	RPL7P18	processed_pseudogene	733
chr5	91440000	94920000	chr5	94877599	94877777	ENSG00000276514	1	-1		misc_RNA	178
chr5	91440000	94920000	chr5	92675956	92688254	ENSG00000249984	1	-1		lncRNA	12298
chr5	91440000	94920000	chr5	92823935	92844992	ENSG00000248588	2	1		lncRNA	21057
chr5	91440000	94920000	chr5	93600357	93603598	ENSG00000278905	1	1		TEC	3241
chr5	91440000	94920000	chr5	93621683	93675081	ENSG00000287180	1	1		lncRNA	53398
chr5	91440000	94920000	chr5	93790505	93801320	ENSG00000287447	1	1		lncRNA	10815
chr5	91440000	94920000	chr5	94111720	94176029	ENSG00000286577	1	1		lncRNA	64309
chr5	91440000	94920000	chr5	94567461	94568909	ENSG00000251544	1	1	MTND5P12	processed_pseudogene	1448
chr5	91440000	94920000	chr5	94611906	94618122	ENSG00000270133	1	-1		lncRNA	6216
chr5	91440000	94920000	chr5	91642643	91799234	ENSG00000286121	1	1		lncRNA	156591
chr5	91440000	94920000	chr5	91380349	91616105	ENSG00000281357	5	1	ARRDC3-AS1	lncRNA	176105
chr5	91440000	94920000	chr5	92410256	92660863	ENSG00000249776	5	-1		lncRNA	250607
chr5	91440000	94920000	chr5	92654848	92679141	ENSG00000249169	1	1		lncRNA	24293
chr5	91440000	94920000	chr5	92907180	92939591	ENSG00000248528	1	-1	LINC02058	lncRNA	32411
chr5	91440000	94920000	chr5	93019663	93068669	ENSG00000251361	1	-1		lncRNA	49006
chr5	91440000	94920000	chr5	93617725	94111699	ENSG00000113391	19	-1	FAM172A	protein_coding	493974
chr5	91440000	94920000	chr5	93583222	93594611	ENSG00000175745	15	1	NR2F1	protein_coding	11389
chr5	91440000	94920000	chr5	93360779	93585649	ENSG00000237187	9	-1	NR2F1-AS1	lncRNA	224870
chr5	91440000	94920000	chr5	94703690	95285094	ENSG00000175471	20	-1	MCTP1	protein_coding	216310
chr5	91440000	94920000	chr5	94618669	94739436	ENSG00000133302	13	1	SLF1	protein_coding	120767
chr5	91440000	94920000	chr5	94150851	94618604	ENSG00000185261	16	-1	KIAA0825	protein_coding	467753
chr5	91440000	94920000	chr5	92082597	92479426	ENSG00000250049	7	1		lncRNA	396829
chr5	142000000	142600000	chr5	142036707	142037125	ENSG00000250347	1	-1		processed_pseudogene	418
chr5	142000000	142600000	chr5	142149435	142150200	ENSG00000289306	1	1		lncRNA	765
chr5	142000000	142600000	chr5	142165767	142168387	ENSG00000280047	1	1		TEC	2620
chr5	142000000	142600000	chr5	142317830	142317920	ENSG00000277968	1	1		misc_RNA	90
chr5	142000000	142600000	chr5	142318047	142318167	ENSG00000274721	1	1		misc_RNA	120
chr5	142000000	142600000	chr5	142566700	142567076	ENSG00000225147	1	1	RPS12P10	processed_pseudogene	376
chr5	142000000	142600000	chr5	141991749	142013041	ENSG00000113552	16	-1	GNPDA1	protein_coding	13041
chr5	142000000	142600000	chr5	142108779	142154440	ENSG00000131507	11	1	NDFIP1	protein_coding	45661
chr5	142000000	142600000	chr5	142310427	142326455	ENSG00000187678	10	-1	SPRY4	protein_coding	16028
chr5	142000000	142600000	chr5	142592178	142698070	ENSG00000113578	18	-1	FGF1	protein_coding	7822
chr5	142000000	142600000	chr5	142325209	142672001	ENSG00000231185	9	1	SPRY4-AS1	lncRNA	274791
chr5	157240000	157760000	chr5	157260122	157266625	ENSG00000253653	1	-1		lncRNA	6503
chr5	157240000	157760000	chr5	157341598	157345677	ENSG00000172568	5	-1	FNDC9	protein_coding	4079
chr5	157240000	157760000	chr5	157363382	157365501	ENSG00000251405	3	-1	NIPAL4-DT	lncRNA	2119
chr5	157240000	157760000	chr5	157422439	157422873	ENSG00000253155	1	1		processed_pseudogene	434
chr5	157240000	157760000	chr5	157579497	157579599	ENSG00000252068	1	1	RNU6-390P	snRNA	102
chr5	157240000	157760000	chr5	157565964	157569098	ENSG00000253519	1	1		lncRNA	3134
chr5	157240000	157760000	chr5	157604707	157605637	ENSG00000254336	1	-1		processed_pseudogene	930
chr5	157240000	157760000	chr5	157689934	157690878	ENSG00000253798	3	-1		transcribed_unprocessed_pseudogene	944
chr5	157240000	157760000	chr5	157682985	157690266	ENSG00000290601	1	-1		lncRNA	7281
chr5	157240000	157760000	chr5	157731420	157741449	ENSG00000113272	14	1	THG1L	protein_coding	10029
chr5	157240000	157760000	chr5	157747504	157747707	ENSG00000253630	1	-1		unprocessed_pseudogene	203
chr5	157240000	157760000	chr5	157375741	157384950	ENSG00000248544	2	-1		lncRNA	9209
chr5	157240000	157760000	chr5	157460213	157474722	ENSG00000172548	15	1	NIPAL4	protein_coding	14509
chr5	157240000	157760000	chr5	157625679	157671480	ENSG00000039600	11	-1	SOX30	protein_coding	45801
chr5	157240000	157760000	chr5	157743712	157760709	ENSG00000155858	6	1	LSM11	protein_coding	16288
chr5	157240000	157760000	chr5	157142933	157255185	ENSG00000113263	14	1	ITK	protein_coding	15185
chr5	157240000	157760000	chr5	157671533	157680158	ENSG00000187658	7	1	C5orf52	protein_coding	8625
chr5	157240000	157760000	chr5	157395534	157575775	ENSG00000135074	16	-1	ADAM19	protein_coding	180241
chr5	157240000	157760000	chr5	157341596	157460100	ENSG00000285868	1	-1		protein_coding	118504
chr5	157240000	157760000	chr5	157266079	157395595	ENSG00000055163	21	1	CYFIP2	protein_coding	129516
chr6	6640000	7280000	chr6	6685148	6686984	ENSG00000279368	1	1		TEC	1836
chr6	6640000	7280000	chr6	6710477	6713976	ENSG00000287497	3	1		lncRNA	3499
chr6	6640000	7280000	chr6	6725036	6733191	ENSG00000288046	1	1		lncRNA	8155
chr6	6640000	7280000	chr6	6758276	6759291	ENSG00000224532	2	-1		lncRNA	1015
chr6	6640000	7280000	chr6	6794915	6795402	ENSG00000219986	2	-1	BTF3P7	processed_pseudogene	487
chr6	6640000	7280000	chr6	6885713	6887257	ENSG00000288860	1	1		lncRNA	1544
chr6	6640000	7280000	chr6	6938606	6938897	ENSG00000240936	3	-1	RN7SL554P	misc_RNA	291
chr6	6640000	7280000	chr6	6993191	6995727	ENSG00000203498	3	1		lncRNA	2536
chr6	6640000	7280000	chr6	7183083	7185287	ENSG00000225092	2	1		lncRNA	2204
chr6	6640000	7280000	chr6	7187582	7187686	ENSG00000201483	1	-1	Y_RNA	misc_RNA	104
chr6	6640000	7280000	chr6	7232556	7232678	ENSG00000287002	1	1		unprocessed_pseudogene	122
chr6	6640000	7280000	chr6	7258910	7261993	ENSG00000285771	1	-1		lncRNA	3083
chr6	6640000	7280000	chr6	6588108	6654983	ENSG00000112799	9	1	LY86	protein_coding	14983
chr6	6640000	7280000	chr6	6692741	6801186	ENSG00000226281	6	-1		lncRNA	108445
chr6	6640000	7280000	chr6	6901022	6918715	ENSG00000223342	2	-1		lncRNA	17693
chr6	6640000	7280000	chr6	7276031	7298872	ENSG00000238221	1	1		lncRNA	3969
chr6	6640000	7280000	chr6	6680309	6686948	ENSG00000261211	2	-1		lncRNA	6639
chr6	6640000	7280000	chr6	7107597	7251980	ENSG00000124782	21	1	RREB1	protein_coding	144383
chr6	6640000	7280000	chr6	7268306	7347446	ENSG00000124783	14	-1	SSR1	protein_coding	11694
chr6	20120000	22160000	chr6	20400741	20401503	ENSG00000289981	1	-1		lncRNA	762
chr6	20120000	22160000	chr6	20421583	20421887	ENSG00000240869	3	-1	RN7SL128P	misc_RNA	304
chr6	20120000	22160000	chr6	20437821	20440178	ENSG00000224707	1	1	E2F3-IT1	lncRNA	2357
chr6	20120000	22160000	chr6	20452369	20452473	ENSG00000222431	1	-1	RNU6-141P	snRNA	104
chr6	20120000	22160000	chr6	20500175	20500276	ENSG00000201683	1	1	Y_RNA	misc_RNA	101
chr6	20120000	22160000	chr6	20722328	20723655	ENSG00000225832	1	-1	RPL36AP25	processed_pseudogene	1327
chr6	20120000	22160000	chr6	20993474	20993568	ENSG00000252046	1	-1	RNU6-150P	snRNA	94
chr6	20120000	22160000	chr6	21354411	21355296	ENSG00000227089	2	-1		lncRNA	885
chr6	20120000	22160000	chr6	21521671	21523845	ENSG00000231754	4	-1		lncRNA	2174
chr6	20120000	22160000	chr6	21602128	21602383	ENSG00000220771	2	1	BOLA2P3	processed_pseudogene	255
chr6	20120000	22160000	chr6	21822536	21822737	ENSG00000280443	1	1		TEC	201
chr6	20120000	22160000	chr6	20265720	20307200	ENSG00000287614	1	1		lncRNA	41480
chr6	20120000	22160000	chr6	20321461	20333193	ENSG00000286590	1	1		lncRNA	11732
chr6	20120000	22160000	chr6	20329922	20334411	ENSG00000287483	1	-1		lncRNA	4489
chr6	20120000	22160000	chr6	20756103	20800694	ENSG00000233848	1	-1		lncRNA	44591
chr6	20120000	22160000	chr6	21369690	21383200	ENSG00000286368	1	-1		lncRNA	13510
chr6	20120000	22160000	chr6	21528739	21595593	ENSG00000283480	1	-1		lncRNA	66854
chr6	20120000	22160000	chr6	21593751	21598619	ENSG00000124766	7	1	SOX4	protein_coding	4868
chr6	20120000	22160000	chr6	22133205	22147193	ENSG00000260455	2	-1	NBAT1	lncRNA	13988
chr6	20120000	22160000	chr6	22085544	22085918	ENSG00000222515	1	1	RN7SKP240	misc_RNA	374
chr6	20120000	22160000	chr6	20212087	20317739	ENSG00000227803	2	1		lncRNA	105652
chr6	20120000	22160000	chr6	20099684	20212469	ENSG00000172197	11	-1	MBOAT1	protein_coding	92469
chr6	20120000	22160000	chr6	20401879	20493714	ENSG00000112242	16	1	E2F3	protein_coding	91835
chr6	20120000	22160000	chr6	21485896	21521414	ENSG00000280989	2	-1	LINC00581	lncRNA	35518
chr6	20120000	22160000	chr6	21233168	21271132	ENSG00000287404	1	-1		lncRNA	37964
chr6	20120000	22160000	chr6	20534457	21232404	ENSG00000145996	11	1	CDKAL1	protein_coding	697947
chr6	20120000	22160000	chr6	21664184	22654455	ENSG00000272168	10	1	CASC15	lncRNA	495816
chr6	30480000	31480000	chr6	30485940	30486590	ENSG00000236603	2	1	RANP1	processed_pseudogene	650
chr6	30480000	31480000	chr6	30516266	30519217	ENSG00000235781	1	1	LINC02569	lncRNA	2951
chr6	30480000	31480000	chr6	30557280	30563723	ENSG00000204576	12	1	PRR3	protein_coding	6443
chr6	30480000	31480000	chr6	30570638	30571273	ENSG00000290047	1	-1		lncRNA	635
chr6	30480000	31480000	chr6	30584332	30584417	ENSG00000216101	3	1	MIR877	miRNA	85
chr6	30480000	31480000	chr6	30633632	30633956	ENSG00000228415	3	1	PTMAP1	processed_pseudogene	324
chr6	30480000	31480000	chr6	30647039	30653210	ENSG00000204564	12	1	C6orf136	protein_coding	6171
chr6	30480000	31480000	chr6	30696806	30697535	ENSG00000230449	1	-1	RPL7P4	processed_pseudogene	729
chr6	30480000	31480000	chr6	30688047	30691420	ENSG00000137404	15	-1	NRM	protein_coding	3373
chr6	30480000	31480000	chr6	30723105	30723877	ENSG00000272540	1	-1		lncRNA	772
chr6	30480000	31480000	chr6	30743199	30744548	ENSG00000137331	12	-1	IER3	protein_coding	1349
chr6	30480000	31480000	chr6	30751038	30751289	ENSG00000263608	2	1	RN7SL353P	misc_RNA	251
chr6	30480000	31480000	chr6	30742757	30743638	ENSG00000272273	3	1	IER3-AS1	lncRNA	881
chr6	30480000	31480000	chr6	30838324	30848204	ENSG00000237923	2	-1	LINC02570	lncRNA	9880
chr6	30480000	31480000	chr6	30864250	30864552	ENSG00000202241	1	1	RN7SKP186	misc_RNA	302
chr6	30480000	31480000	chr6	30890883	30890972	ENSG00000284370	1	1	MIR4640	miRNA	89
chr6	30480000	31480000	chr6	30908207	30914106	ENSG00000213780	11	1	GTF2H4	protein_coding	5899
chr6	30480000	31480000	chr6	30932618	30932709	ENSG00000252761	1	-1	Y_RNA	misc_RNA	91
chr6	30480000	31480000	chr6	30961403	30962396	ENSG00000275906	1	-1	NAPGP2	processed_pseudogene	993
chr6	30480000	31480000	chr6	30983718	30989903	ENSG00000204544	5	1	MUC21	protein_coding	6185
chr6	30480000	31480000	chr6	31053450	31059890	ENSG00000228789	9	1	HCG22	protein_coding	6440
chr6	30480000	31480000	chr6	31083010	31083109	ENSG00000222895	1	1	RNU6-1133P	snRNA	99
chr6	30480000	31480000	chr6	31111223	31112575	ENSG00000204542	3	-1	C6orf15	protein_coding	1352
chr6	30480000	31480000	chr6	31115087	31120446	ENSG00000204539	4	-1	CDSN	protein_coding	5359
chr6	30480000	31480000	chr6	31137534	31139066	ENSG00000204538	4	-1	PSORS1C2	protein_coding	1532
chr6	30480000	31480000	chr6	31140727	31140913	ENSG00000238211	1	1	POLR2LP1	processed_pseudogene	186
chr6	30480000	31480000	chr6	31173735	31177899	ENSG00000204528	3	-1	PSORS1C3	lncRNA	4164
chr6	30480000	31480000	chr6	31195200	31198037	ENSG00000272501	1	-1		lncRNA	2837
chr6	30480000	31480000	chr6	31200165	31201918	ENSG00000271821	1	-1		lncRNA	1753
chr6	30480000	31480000	chr6	31197760	31203968	ENSG00000206344	8	1	HCG27	lncRNA	6208
chr6	30480000	31480000	chr6	31222913	31223093	ENSG00000255726	1	1		unprocessed_pseudogene	180
chr6	30480000	31480000	chr6	31224342	31225058	ENSG00000255899	1	-1		unprocessed_pseudogene	716
chr6	30480000	31480000	chr6	31268749	31272130	ENSG00000204525	18	-1	HLA-C	protein_coding	3381
chr6	30480000	31480000	chr6	31272240	31272590	ENSG00000288813	1	1		lncRNA	350
chr6	30480000	31480000	chr6	31280317	31281519	ENSG00000227939	1	1	RPL3P2	processed_pseudogene	1202
chr6	30480000	31480000	chr6	31287510	31288964	ENSG00000231402	1	-1	WASF5P	processed_pseudogene	1454
chr6	30480000	31480000	chr6	31293908	31301642	ENSG00000256166	1	-1	LINC02571	lncRNA	7734
chr6	30480000	31480000	chr6	31307815	31308549	ENSG00000229836	1	-1		unprocessed_pseudogene	734
chr6	30480000	31480000	chr6	31355224	31355316	ENSG00000277402	1	-1	MIR6891	miRNA	92
chr6	30480000	31480000	chr6	31356647	31357637	ENSG00000271581	1	1		unprocessed_pseudogene	990
chr6	30480000	31480000	chr6	31370134	31370240	ENSG00000201658	1	1	RNU6-283P	snRNA	106
chr6	30480000	31480000	chr6	31360865	31367354	ENSG00000228432	2	-1	DHFRP2	transcribed_processed_pseudogene	6489
chr6	30480000	31480000	chr6	31377419	31378019	ENSG00000230994	1	1	FGFR3P1	processed_pseudogene	600
chr6	30480000	31480000	chr6	31380411	31380839	ENSG00000223702	1	1	ZDHHC20P2	processed_pseudogene	428
chr6	30480000	31480000	chr6	31382074	31382288	ENSG00000225851	1	-1	HLA-S	unprocessed_pseudogene	214
chr6	30480000	31480000	chr6	31394289	31395495	ENSG00000272221	1	-1		lncRNA	1206
chr6	30480000	31480000	chr6	31402152	31402250	ENSG00000199332	1	-1	Y_RNA	misc_RNA	98
chr6	30480000	31480000	chr6	31441667	31446973	ENSG00000230174	1	1	LINC01149	lncRNA	5306
chr6	30480000	31480000	chr6	31462728	31463336	ENSG00000233902	1	-1		unprocessed_pseudogene	608
chr6	30480000	31480000	chr6	30489509	30494194	ENSG00000204592	9	1	HLA-E	protein_coding	4685
chr6	30480000	31480000	chr6	30460825	30481634	ENSG00000288805	1	-1		lncRNA	1634
chr6	30480000	31480000	chr6	30600413	30618612	ENSG00000204569	10	-1	PPP1R10	protein_coding	18199
chr6	30480000	31480000	chr6	30617840	30626395	ENSG00000204568	12	1	MRPS18B	protein_coding	8555
chr6	30480000	31480000	chr6	30571393	30597179	ENSG00000204574	14	1	ABCF1	protein_coding	25786
chr6	30480000	31480000	chr6	30541381	30556489	ENSG00000204590	13	-1	GNL1	protein_coding	15108
chr6	30480000	31480000	chr6	30626842	30646823	ENSG00000137343	18	1	ATAT1	protein_coding	19981
chr6	30480000	31480000	chr6	30676389	30687895	ENSG00000146112	12	-1	PPP1R18	protein_coding	11506
chr6	30480000	31480000	chr6	30703067	30713184	ENSG00000224328	1	1	MDC1-AS1	lncRNA	10117
chr6	30480000	31480000	chr6	30717435	30725538	ENSG00000196230	14	1	TUBB	protein_coding	8103
chr6	30480000	31480000	chr6	30727709	30742732	ENSG00000137312	15	-1	FLOT1	protein_coding	15023
chr6	30480000	31480000	chr6	30736304	30736414	ENSG00000201988	2	-1	Y_RNA	misc_RNA	110
chr6	30480000	31480000	chr6	30743790	30792250	ENSG00000228022	6	1	HCG20	lncRNA	48460
chr6	30480000	31480000	chr6	30699807	30717447	ENSG00000137337	16	-1	MDC1	protein_coding	17640
chr6	30480000	31480000	chr6	30866982	30875918	ENSG00000237775	1	-1	DDR1-DT	lncRNA	8936
chr6	30480000	31480000	chr6	30908242	30926459	ENSG00000288473	1	1		lncRNA	18217
chr6	30480000	31480000	chr6	30914205	30926459	ENSG00000137411	19	1	VARS2	protein_coding	12254
chr6	30480000	31480000	chr6	30876421	30900156	ENSG00000204580	14	1	DDR1	protein_coding	23735
chr6	30480000	31480000	chr6	30945979	30954862	ENSG00000233529	1	-1	HCG21	lncRNA	8883
chr6	30480000	31480000	chr6	31010474	31035402	ENSG00000261272	1	1	MUC22	protein_coding	24928
chr6	30480000	31480000	chr6	30934523	30954221	ENSG00000168631	14	1	MUCL3	protein_coding	19698
chr6	30480000	31480000	chr6	31114750	31140092	ENSG00000204540	11	1	PSORS1C1	protein_coding	25342
chr6	30480000	31480000	chr6	31164337	31180731	ENSG00000204531	21	-1	POU5F1	protein_coding	16394
chr6	30480000	31480000	chr6	31142439	31158238	ENSG00000204536	15	-1	CCHCR1	protein_coding	15799
chr6	30480000	31480000	chr6	31158331	31167159	ENSG00000137310	13	1	TCF19	protein_coding	8828
chr6	30480000	31480000	chr6	31275572	31278754	ENSG00000214892	4	1	USP8P1	processed_pseudogene	3182
chr6	30480000	31480000	chr6	31367057	31376088	ENSG00000285647	1	1		lncRNA	9031
chr6	30480000	31480000	chr6	31399784	31415315	ENSG00000204520	14	1	MICA	protein_coding	15531
chr6	30480000	31480000	chr6	31353872	31367067	ENSG00000234745	14	-1	HLA-B	protein_coding	13195
chr6	30480000	31480000	chr6	31479973	31494935	ENSG00000286940	1	-1	MICB-DT	lncRNA	27
chr6	30480000	31480000	chr6	31463170	31478936	ENSG00000206337	12	1	HCP5	lncRNA	15766
chr6	30480000	31480000	chr6	30931353	30955636	ENSG00000196260	5	-1	SFTA2	protein_coding	24283
chr6	30480000	31480000	chr6	30653119	30673006	ENSG00000204560	10	-1	DHX16	protein_coding	19887
chr6	30480000	31480000	chr6	30798211	30830659	ENSG00000214894	7	-1	LINC00243	lncRNA	32448
chr6	30480000	31480000	chr6	31400702	31463705	ENSG00000288587	1	1		lncRNA	63003
chr6	56320000	58480000	chr6	56331788	56332117	ENSG00000227602	1	-1		lncRNA	329
chr6	56320000	58480000	chr6	56431950	56433213	ENSG00000220666	2	-1	RCC2P7	processed_pseudogene	1263
chr6	56320000	58480000	chr6	56871191	56871743	ENSG00000216854	2	1	RPL17P26	processed_pseudogene	552
chr6	56320000	58480000	chr6	56945730	56945836	ENSG00000200224	2	1	RNU6-626P	snRNA	106
chr6	56320000	58480000	chr6	56975606	56976062	ENSG00000219790	3	-1	OSTCP6	processed_pseudogene	456
chr6	56320000	58480000	chr6	57004520	57004799	ENSG00000218980	2	1	FTH1P15	processed_pseudogene	279
chr6	56320000	58480000	chr6	57029521	57029988	ENSG00000276576	1	1	MRPL30P1	processed_pseudogene	467
chr6	56320000	58480000	chr6	57390132	57390212	ENSG00000212017	2	1	MIR548U	miRNA	80
chr6	56320000	58480000	chr6	57493855	57497691	ENSG00000266579	1	1		lncRNA	3836
chr6	56320000	58480000	chr6	57855891	57856468	ENSG00000272541	1	-1		lncRNA	577
chr6	56320000	58480000	chr6	57880071	57884297	ENSG00000286723	1	-1		lncRNA	4226
chr6	56320000	58480000	chr6	57902609	57903148	ENSG00000271761	1	-1		lncRNA	539
chr6	56320000	58480000	chr6	57908560	57913911	ENSG00000272316	1	-1		lncRNA	5351
chr6	56320000	58480000	chr6	57919784	57930291	ENSG00000239650	4	-1	GUSBP4	transcribed_unprocessed_pseudogene	10507
chr6	56320000	58480000	chr6	57937458	57939015	ENSG00000218189	4	1	POM121L14P	processed_pseudogene	1557
chr6	56320000	58480000	chr6	57959029	57961345	ENSG00000215190	10	-1	LINC00680	transcribed_unprocessed_pseudogene	2316
chr6	56320000	58480000	chr6	57967687	57968661	ENSG00000214563	2	-1	GAPDHP15	processed_pseudogene	974
chr6	56320000	58480000	chr6	58071720	58073134	ENSG00000216687	2	-1		processed_pseudogene	1414
chr6	56320000	58480000	chr6	58119741	58121029	ENSG00000214561	3	-1	RBBP4P4	processed_pseudogene	1288
chr6	56320000	58480000	chr6	58386799	58386961	ENSG00000275046	1	1		processed_pseudogene	162
chr6	56320000	58480000	chr6	56843928	56864078	ENSG00000231441	2	1	DST-AS1	lncRNA	20150
chr6	56320000	58480000	chr6	57046532	57055239	ENSG00000168116	14	1	KIAA1586	protein_coding	8707
chr6	56320000	58480000	chr6	57172326	57189833	ENSG00000112208	11	1	BAG2	protein_coding	17507
chr6	56320000	58480000	chr6	57186992	57222307	ENSG00000112210	12	-1	RAB23	protein_coding	35315
chr6	56320000	58480000	chr6	57946074	57961501	ENSG00000290555	1	-1	LINC00680	lncRNA	15427
chr6	56320000	58480000	chr6	56056590	56394094	ENSG00000124749	18	-1	COL21A1	protein_coding	74094
chr6	56320000	58480000	chr6	57314805	57646850	ENSG00000146143	19	1	PRIM2	protein_coding	332045
chr6	56320000	58480000	chr6	56955107	57027346	ENSG00000151917	18	1	BEND6	protein_coding	72239
chr6	56320000	58480000	chr6	57086844	57170305	ENSG00000112200	17	1	ZNF451	protein_coding	83461
chr6	56320000	58480000	chr6	57114894	57174236	ENSG00000226803	9	-1	ZNF451-AS1	lncRNA	59342
chr6	56320000	58480000	chr6	57919912	57961382	ENSG00000283352	1	-1		lncRNA	41470
chr6	56320000	58480000	chr6	57961438	58438364	ENSG00000225096	3	1		lncRNA	476926
chr6	56320000	58480000	chr6	56457987	56954830	ENSG00000151914	22	-1	DST	protein_coding	496843
chr6	73400000	75240000	chr6	73464073	73464177	ENSG00000207023	1	1	RNU6-975P	snRNA	104
chr6	73400000	75240000	chr6	73487590	73487877	ENSG00000271986	2	-1	RN7SL827P	misc_RNA	287
chr6	73400000	75240000	chr6	73526744	73526879	ENSG00000223967	1	-1		processed_pseudogene	135
chr6	73400000	75240000	chr6	73570461	73571961	ENSG00000289286	1	-1		lncRNA	1500
chr6	73400000	75240000	chr6	73618346	73618597	ENSG00000218459	1	1	RPS27P15	processed_pseudogene	251
chr6	73400000	75240000	chr6	73971346	73973115	ENSG00000279790	1	1		TEC	1769
chr6	73400000	75240000	chr6	74004520	74004812	ENSG00000217268	1	-1	TXNP7	processed_pseudogene	292
chr6	73400000	75240000	chr6	74282266	74282660	ENSG00000217178	1	1	FAM136FP	processed_pseudogene	394
chr6	73400000	75240000	chr6	74610449	74610715	ENSG00000218483	1	-1		processed_pseudogene	266
chr6	73400000	75240000	chr6	74849077	74850484	ENSG00000219736	1	-1		processed_pseudogene	1407
chr6	73400000	75240000	chr6	75237675	75250323	ENSG00000112695	13	-1	COX7A2	protein_coding	2325
chr6	73400000	75240000	chr6	73489308	73525587	ENSG00000156508	19	-1	EEF1A1	protein_coding	36279
chr6	73400000	75240000	chr6	73413515	73452297	ENSG00000164430	17	-1	CGAS	protein_coding	38782
chr6	73400000	75240000	chr6	73461578	73509236	ENSG00000135297	17	1	MTO1	protein_coding	47658
chr6	73400000	75240000	chr6	73593379	73653992	ENSG00000119899	13	-1	SLC17A5	protein_coding	60613
chr6	73400000	75240000	chr6	73693903	73696131	ENSG00000231652	2	-1	CD109-AS1	lncRNA	2228
chr6	73400000	75240000	chr6	74642384	74652002	ENSG00000224583	1	1		lncRNA	9618
chr6	73400000	75240000	chr6	73695785	73828316	ENSG00000156535	15	1	CD109	protein_coding	132531
chr6	73400000	75240000	chr6	73523618	73570596	ENSG00000229862	5	1	EEF1A1-AS1	lncRNA	46978
chr6	73400000	75240000	chr6	74530248	74734319	ENSG00000272243	6	-1		lncRNA	204071
chr6	73400000	75240000	chr6	75084326	75206267	ENSG00000111799	22	-1	COL12A1	protein_coding	121941
chr6	73400000	75240000	chr6	74069451	74690727	ENSG00000223786	1	1		lncRNA	621276
chr6	73400000	75240000	chr6	73394828	73417566	ENSG00000080007	8	1	DDX43	protein_coding	17566
chr6	99840000	100680000	chr6	100050372	100051236	ENSG00000219257	2	-1	NPM1P38	processed_pseudogene	864
chr6	99840000	100680000	chr6	100093311	100093768	ENSG00000275716	1	-1		processed_pseudogene	457
chr6	99840000	100680000	chr6	100136064	100136663	ENSG00000213177	3	1	PRDX2P4	processed_pseudogene	599
chr6	99840000	100680000	chr6	100177209	100178192	ENSG00000216378	1	1		processed_pseudogene	983
chr6	99840000	100680000	chr6	100530276	100531052	ENSG00000220695	1	1		processed_pseudogene	776
chr6	99840000	100680000	chr6	99918519	99994247	ENSG00000152034	11	-1	MCHR2	protein_coding	75728
chr6	99840000	100680000	chr6	100427118	100437484	ENSG00000228082	1	1	SIM1-AS1	lncRNA	10366
chr6	99840000	100680000	chr6	99993934	100107613	ENSG00000229315	7	1	MCHR2-AS1	lncRNA	113679
chr6	99840000	100680000	chr6	100385009	100464921	ENSG00000112246	10	-1	SIM1	protein_coding	79912
chr6	99840000	100680000	chr6	100508194	100881372	ENSG00000112249	14	-1	ASCC3	protein_coding	171806
chr6	118920000	121320000	chr6	119057880	119057974	ENSG00000222649	1	1	Y_RNA	misc_RNA	94
chr6	118920000	121320000	chr6	119069047	119069143	ENSG00000207982	1	-1	MIR548B	miRNA	96
chr6	118920000	121320000	chr6	119159297	119159476	ENSG00000220139	1	1		processed_pseudogene	179
chr6	118920000	121320000	chr6	119269133	119269714	ENSG00000216316	1	-1	RPL13AP15	processed_pseudogene	581
chr6	118920000	121320000	chr6	119327281	119327385	ENSG00000200732	1	1	RNU6-194P	snRNA	104
chr6	118920000	121320000	chr6	120015179	120015257	ENSG00000265725	1	1	MIR3144	miRNA	78
chr6	118920000	121320000	chr6	120526294	120526400	ENSG00000206857	1	-1	RNU6-214P	snRNA	106
chr6	118920000	121320000	chr6	120686621	120686742	ENSG00000200310	1	1	RNA5SP215	rRNA_pseudogene	121
chr6	118920000	121320000	chr6	120781220	120781512	ENSG00000216710	1	1	COX6A1P3	processed_pseudogene	292
chr6	118920000	121320000	chr6	120840733	120845475	ENSG00000287992	1	1		lncRNA	4742
chr6	118920000	121320000	chr6	118934770	119182745	ENSG00000253194	2	1		lncRNA	247975
chr6	118920000	121320000	chr6	118959763	119149387	ENSG00000111879	20	-1	FAM184A	protein_coding	189624
chr6	118920000	121320000	chr6	119177205	119349761	ENSG00000111885	7	-1	MAN1A1	protein_coding	172556
chr6	118920000	121320000	chr6	118813442	118935162	ENSG00000111877	18	-1	MCM9	protein_coding	15162
chr6	118920000	121320000	chr6	121079494	121334745	ENSG00000146350	14	-1	TBC1D32	protein_coding	240506
chr6	118920000	121320000	chr6	120462511	120706789	ENSG00000286540	1	1		lncRNA	244278
chr6	118920000	121320000	chr6	119349886	119689173	ENSG00000287100	3	1		lncRNA	339287
chr6	128800000	129480000	chr6	128928995	128929988	ENSG00000220884	2	-1	MESTP1	processed_pseudogene	993
chr6	128800000	129480000	chr6	129157523	129159120	ENSG00000219642	2	-1	BMPR1AP1	processed_pseudogene	1597
chr6	128800000	129480000	chr6	129436875	129436980	ENSG00000252554	1	-1	RNU6-861P	snRNA	105
chr6	128800000	129480000	chr6	129479615	129481410	ENSG00000233351	1	-1		lncRNA	385
chr6	128800000	129480000	chr6	129439485	129576047	ENSG00000226149	6	-1		lncRNA	40515
chr6	128800000	129480000	chr6	128883138	129516566	ENSG00000196569	14	1	LAMA2	protein_coding	596862
chr6	129600000	130040000	chr6	129756298	129757112	ENSG00000218689	2	-1	RPL5P21	processed_pseudogene	814
chr6	129600000	130040000	chr6	129783769	129784045	ENSG00000219666	2	-1		processed_pseudogene	276
chr6	129600000	130040000	chr6	129800908	129802214	ENSG00000218725	2	1	B3GALNT2P1	processed_pseudogene	1306
chr6	129600000	130040000	chr6	129819637	129820170	ENSG00000219302	2	-1		processed_pseudogene	533
chr6	129600000	130040000	chr6	129831244	129861547	ENSG00000203756	8	-1	TMEM244	protein_coding	30303
chr6	129600000	130040000	chr6	129576132	129710177	ENSG00000146376	11	-1	ARHGAP18	protein_coding	110177
chr6	129600000	130040000	chr6	130013699	130141449	ENSG00000198945	8	1	L3MBTL3	protein_coding	26301
chr6	132800000	133560000	chr6	132814569	132817564	ENSG00000112306	8	1	RPS12	protein_coding	2995
chr6	132800000	133560000	chr6	132815307	132815379	ENSG00000206754	1	1	SNORD101	snoRNA	72
chr6	132800000	133560000	chr6	132816802	132816877	ENSG00000221500	1	1	SNORD100	snoRNA	75
chr6	132800000	133560000	chr6	132817219	132817348	ENSG00000200534	1	1	SNORA33	snoRNA	129
chr6	132800000	133560000	chr6	132868218	132868859	ENSG00000220557	1	-1	HMGB1P13	processed_pseudogene	641
chr6	132800000	133560000	chr6	132891924	132893819	ENSG00000279960	1	1		TEC	1895
chr6	132800000	133560000	chr6	132997551	132998040	ENSG00000213122	4	-1	RPL23AP46	processed_pseudogene	489
chr6	132800000	133560000	chr6	133150568	133150816	ENSG00000220113	2	1	MTCYBP4	processed_pseudogene	248
chr6	132800000	133560000	chr6	133435077	133439464	ENSG00000223542	1	-1		lncRNA	4387
chr6	132800000	133560000	chr6	133452857	133456605	ENSG00000234567	1	-1		lncRNA	3748
chr6	132800000	133560000	chr6	133510386	133510693	ENSG00000238059	1	-1	HSPE1P21	processed_pseudogene	307
chr6	132800000	133560000	chr6	133540784	133541174	ENSG00000272428	1	1		lncRNA	390
chr6	132800000	133560000	chr6	133061240	133103128	ENSG00000286438	1	-1		lncRNA	41888
chr6	132800000	133560000	chr6	132769370	132813339	ENSG00000146409	12	-1	SLC18B1	protein_coding	13339
chr6	132800000	133560000	chr6	132954257	133107410	ENSG00000231023	9	1	LINC00326	lncRNA	153153
chr6	132800000	133560000	chr6	133502252	133892802	ENSG00000227954	7	-1	TARID	lncRNA	57748
chr6	132800000	133560000	chr6	133240514	133532128	ENSG00000112319	21	1	EYA4	protein_coding	291614
chr6	144560000	145800000	chr6	144706733	144707047	ENSG00000217195	1	-1		processed_pseudogene	314
chr6	144560000	145800000	chr6	144708106	144708497	ENSG00000220739	2	-1		processed_pseudogene	391
chr6	144560000	145800000	chr6	144922315	144929987	ENSG00000289850	1	1		lncRNA	7672
chr6	144560000	145800000	chr6	145463238	145463399	ENSG00000201119	1	-1	RNU1-33P	snRNA	161
chr6	144560000	145800000	chr6	145736911	145737173	ENSG00000270828	1	-1		lncRNA	262
chr6	144560000	145800000	chr6	145749917	145751137	ENSG00000288551	1	1		lncRNA	1220
chr6	144560000	145800000	chr6	145789270	145791973	ENSG00000280184	2	-1		TEC	2703
chr6	144560000	145800000	chr6	145296545	145311092	ENSG00000285598	1	1		lncRNA	14547
chr6	144560000	145800000	chr6	145735570	145737218	ENSG00000270638	1	1		lncRNA	1648
chr6	144560000	145800000	chr6	145784406	145786559	ENSG00000288056	1	-1		lncRNA	2153
chr6	144560000	145800000	chr6	145793502	145814795	ENSG00000118496	5	-1	FBXO30	protein_coding	6498
chr6	144560000	145800000	chr6	145489630	145492092	ENSG00000217612	2	-1		processed_pseudogene	2462
chr6	144560000	145800000	chr6	145382535	145736023	ENSG00000112425	16	-1	EPM2A	protein_coding	353488
chr6	144560000	145800000	chr6	145799409	145887430	ENSG00000235652	11	1	EPM2A-DT	lncRNA	591
chr6	144560000	145800000	chr6	144285335	144853034	ENSG00000152818	20	1	UTRN	protein_coding	293034
chr6	151000000	151400000	chr6	151054897	151056057	ENSG00000232290	1	-1		lncRNA	1160
chr6	151000000	151400000	chr6	151099529	151099933	ENSG00000219747	1	1	RPL32P16	processed_pseudogene	404
chr6	151000000	151400000	chr6	151196681	151197638	ENSG00000231883	1	-1		lncRNA	957
chr6	151000000	151400000	chr6	151201341	151201444	ENSG00000238616	1	1	RNU6-300P	snRNA	103
chr6	151000000	151400000	chr6	151225550	151225947	ENSG00000213087	3	-1		processed_pseudogene	397
chr6	151000000	151400000	chr6	151280515	151280612	ENSG00000252431	1	-1	RNU6-1247P	snRNA	97
chr6	151000000	151400000	chr6	151298841	151298933	ENSG00000252487	1	-1	RNY4P20	misc_RNA	92
chr6	151000000	151400000	chr6	151319635	151319950	ENSG00000223039	1	1	RN7SKP268	misc_RNA	315
chr6	151000000	151400000	chr6	151378000	151378099	ENSG00000252615	1	-1	Y_RNA	misc_RNA	99
chr6	151000000	151400000	chr6	151398898	151452158	ENSG00000155906	20	-1	RMND1	protein_coding	1102
chr6	151000000	151400000	chr6	151088103	151228447	ENSG00000223598	1	-1		lncRNA	140344
chr6	151000000	151400000	chr6	151239967	151358559	ENSG00000131016	17	1	AKAP12	protein_coding	118592
chr6	151000000	151400000	chr6	151364115	151391559	ENSG00000181472	5	-1	ZBTB2	protein_coding	27444
chr6	151000000	151400000	chr6	150865679	151101887	ENSG00000120254	16	1	MTHFD1L	protein_coding	101887
chr6	158640000	159000000	chr6	158636474	158644743	ENSG00000146425	11	-1	DYNLT1	protein_coding	4743
chr6	158640000	159000000	chr6	158725747	158726803	ENSG00000219249	2	-1	AMZ2P2	processed_pseudogene	1056
chr6	158640000	159000000	chr6	158764661	158764753	ENSG00000265558	1	-1	MIR3918	miRNA	92
chr6	158640000	159000000	chr6	158817979	158822252	ENSG00000233893	2	1	EZR-AS1	lncRNA	4273
chr6	158640000	159000000	chr6	158921271	158922150	ENSG00000213076	3	-1		processed_pseudogene	879
chr6	158640000	159000000	chr6	158926466	158926571	ENSG00000223191	1	-1	RNU6-293P	snRNA	105
chr6	158640000	159000000	chr6	158841117	158857632	ENSG00000243775	2	-1	OSTCP1	transcribed_processed_pseudogene	16515
chr6	158640000	159000000	chr6	158765741	158819368	ENSG00000092820	19	-1	EZR	protein_coding	53627
chr6	158640000	159000000	chr6	158869848	158919105	ENSG00000203711	16	1	LINC02901	lncRNA	49257
chr6	158640000	159000000	chr6	158853588	158864502	ENSG00000285159	1	1		lncRNA	10914
chr6	158640000	159000000	chr6	158972871	159000202	ENSG00000130363	13	-1	RSPH3	protein_coding	27129
chr6	158640000	159000000	chr6	158650014	158764876	ENSG00000164674	17	1	SYTL3	protein_coding	114862
chr6	158640000	159000000	chr6	158988178	159088114	ENSG00000271913	9	1	TAGAP-AS1	lncRNA	11822
chr7	5160000	5800000	chr7	5180061	5180162	ENSG00000202039	1	1	RNU6-215P	snRNA	101
chr7	5160000	5800000	chr7	5419827	5420767	ENSG00000241269	1	1		lncRNA	940
chr7	5160000	5800000	chr7	5426277	5428927	ENSG00000234432	4	-1	LINC02983	lncRNA	2650
chr7	5160000	5800000	chr7	5424313	5424942	ENSG00000290091	1	1		lncRNA	629
chr7	5160000	5800000	chr7	5425714	5426402	ENSG00000272953	2	1		lncRNA	688
chr7	5160000	5800000	chr7	5428184	5430566	ENSG00000273084	2	1	LINC03073	lncRNA	2382
chr7	5160000	5800000	chr7	5475804	5479811	ENSG00000230733	2	1		lncRNA	4007
chr7	5160000	5800000	chr7	5495819	5495917	ENSG00000207973	1	-1	MIR589	miRNA	98
chr7	5160000	5800000	chr7	5556731	5557245	ENSG00000272719	1	1		lncRNA	514
chr7	5160000	5800000	chr7	5560743	5561055	ENSG00000228974	5	1		processed_pseudogene	312
chr7	5160000	5800000	chr7	5711840	5711910	ENSG00000283419	1	-1	MIR6874	miRNA	70
chr7	5160000	5800000	chr7	5190196	5233840	ENSG00000157954	15	1	WIPI2	protein_coding	43644
chr7	5160000	5800000	chr7	5274369	5306912	ENSG00000164638	11	1	SLC29A4	protein_coding	32543
chr7	5160000	5800000	chr7	5419846	5423122	ENSG00000188365	3	1		lncRNA	3276
chr7	5160000	5800000	chr7	5526409	5563902	ENSG00000075624	17	-1	ACTB	protein_coding	37493
chr7	5160000	5800000	chr7	5592816	5606655	ENSG00000075618	18	1	FSCN1	protein_coding	13839
chr7	5160000	5800000	chr7	5662432	5680461	ENSG00000237738	1	-1	RNF216-IT1	lncRNA	18029
chr7	5160000	5800000	chr7	5620047	5781696	ENSG00000011275	19	-1	RNF216	protein_coding	161649
chr7	5160000	5800000	chr7	5306790	5425414	ENSG00000182095	15	-1	TNRC18	protein_coding	118624
chr7	5160000	5800000	chr7	5431335	5513809	ENSG00000155034	21	-1	FBXL18	protein_coding	82474
chr7	23240000	23520000	chr7	23298739	23311729	ENSG00000156928	5	1	MALSU1	protein_coding	12990
chr7	23240000	23520000	chr7	23365618	23365976	ENSG00000232627	1	1		processed_pseudogene	358
chr7	23240000	23520000	chr7	23396446	23396516	ENSG00000212264	1	1	SNORD65C	snoRNA	70
chr7	23240000	23520000	chr7	23450658	23450722	ENSG00000252590	1	1	RNU7-143P	snRNA	64
chr7	23240000	23520000	chr7	23474647	23475372	ENSG00000289109	1	1		lncRNA	725
chr7	23240000	23520000	chr7	23480753	23480959	ENSG00000236654	2	1		processed_pseudogene	206
chr7	23240000	23520000	chr7	23490473	23491364	ENSG00000232818	2	1	RPS2P32	processed_pseudogene	891
chr7	23240000	23520000	chr7	23491792	23491893	ENSG00000200847	1	-1	Y_RNA	misc_RNA	101
chr7	23240000	23520000	chr7	23235967	23275108	ENSG00000136235	17	1	GPNMB	protein_coding	35108
chr7	23240000	23520000	chr7	23504780	23532041	ENSG00000164548	12	-1	TRA2A	protein_coding	15220
chr7	23240000	23520000	chr7	23310209	23470491	ENSG00000136231	14	-1	IGF2BP3	protein_coding	160282
chr7	23560000	25160000	chr7	23562459	23564261	ENSG00000224785	1	-1		processed_pseudogene	1802
chr7	23560000	25160000	chr7	23585062	23586355	ENSG00000232553	3	-1	CLK2P1	processed_pseudogene	1293
chr7	23560000	25160000	chr7	23619333	23622826	ENSG00000227436	1	1	FCF1P1	processed_pseudogene	3493
chr7	23560000	25160000	chr7	23655682	23655861	ENSG00000228953	1	1		processed_pseudogene	179
chr7	23560000	25160000	chr7	23679601	23680842	ENSG00000234286	3	-1		lncRNA	1241
chr7	23560000	25160000	chr7	23721311	23721782	ENSG00000234800	2	-1	PCMTD1P3	processed_pseudogene	471
chr7	23560000	25160000	chr7	23811144	23811660	ENSG00000231328	1	-1	TPT1P7	processed_pseudogene	516
chr7	23560000	25160000	chr7	23891704	23897335	ENSG00000227930	1	-1		lncRNA	5631
chr7	23560000	25160000	chr7	24132705	24132837	ENSG00000252041	1	1	RNA5SP228	rRNA_pseudogene	132
chr7	23560000	25160000	chr7	24284188	24291862	ENSG00000122585	8	1	NPY	protein_coding	7674
chr7	23560000	25160000	chr7	24537332	24537438	ENSG00000206877	1	1	RNU6-1103P	snRNA	106
chr7	23560000	25160000	chr7	24589115	24589407	ENSG00000271096	1	-1	SUMO2P14	processed_pseudogene	292
chr7	23560000	25160000	chr7	24674309	24674612	ENSG00000271330	1	-1		processed_pseudogene	303
chr7	23560000	25160000	chr7	24906135	24906594	ENSG00000234999	1	-1	SNRPCP19	processed_pseudogene	459
chr7	23560000	25160000	chr7	25118656	25125260	ENSG00000172115	9	-1	CYCS	protein_coding	6604
chr7	23560000	25160000	chr7	23597382	23644708	ENSG00000169193	12	1	CCDC126	protein_coding	47326
chr7	23560000	25160000	chr7	23680130	23703249	ENSG00000188732	11	1	FAM221A	protein_coding	23119
chr7	23560000	25160000	chr7	24698355	24757940	ENSG00000105928	16	-1	GSDME	protein_coding	59585
chr7	23560000	25160000	chr7	24778444	24795496	ENSG00000287093	1	-1		lncRNA	17052
chr7	23560000	25160000	chr7	23710203	23832513	ENSG00000196335	13	1	STK31	protein_coding	122310
chr7	23560000	25160000	chr7	24796540	24981634	ENSG00000070882	13	-1	OSBPL3	protein_coding	185094
chr7	23560000	25160000	chr7	24318094	24445128	ENSG00000287523	1	-1		lncRNA	127034
chr7	23560000	25160000	chr7	24196662	24255719	ENSG00000228944	1	-1		lncRNA	59057
chr7	23560000	25160000	chr7	24573268	24694193	ENSG00000105926	16	1	PALS2	protein_coding	120925
chr7	23560000	25160000	chr7	25134692	25180356	ENSG00000153790	12	-1	C7orf31	protein_coding	25308
chr7	26840000	27160000	chr7	26922110	26922912	ENSG00000213787	3	1	RPL7AP38	processed_pseudogene	802
chr7	26840000	27160000	chr7	26982768	26983367	ENSG00000226059	2	-1	HMGB3P20	processed_pseudogene	599
chr7	26840000	27160000	chr7	27023737	27024907	ENSG00000214869	5	1	TPM3P4	processed_pseudogene	1170
chr7	26840000	27160000	chr7	27048169	27048628	ENSG00000213786	3	1	NHP2P2	processed_pseudogene	459
chr7	26840000	27160000	chr7	27096124	27096248	ENSG00000276528	1	1		misc_RNA	124
chr7	26840000	27160000	chr7	27098900	27099114	ENSG00000276771	1	1		misc_RNA	214
chr7	26840000	27160000	chr7	27092993	27096000	ENSG00000105991	10	-1	HOXA1	protein_coding	3007
chr7	26840000	27160000	chr7	27099778	27099836	ENSG00000274864	1	1		misc_RNA	58
chr7	26840000	27160000	chr7	27099856	27099957	ENSG00000274396	1	1		misc_RNA	101
chr7	26840000	27160000	chr7	27099967	27100111	ENSG00000277694	1	1		misc_RNA	144
chr7	26840000	27160000	chr7	27100354	27102686	ENSG00000105996	7	-1	HOXA2	protein_coding	2332
chr7	26840000	27160000	chr7	27128507	27130780	ENSG00000197576	15	-1	HOXA4	protein_coding	2273
chr7	26840000	27160000	chr7	27141052	27143681	ENSG00000106004	5	-1	HOXA5	protein_coding	2629
chr7	26840000	27160000	chr7	27153716	27157936	ENSG00000122592	8	-1	HOXA7	protein_coding	4220
chr7	26840000	27160000	chr7	27158344	27158976	ENSG00000270182	1	1		lncRNA	632
chr7	26840000	27160000	chr7	27095647	27100265	ENSG00000233429	9	1	HOTAIRM1	lncRNA	4618
chr7	26840000	27160000	chr7	27145396	27150603	ENSG00000106006	6	-1	HOXA6	protein_coding	5207
chr7	26840000	27160000	chr7	27147366	27152598	ENSG00000272801	1	-1		lncRNA	5232
chr7	26840000	27160000	chr7	26667068	26995239	ENSG00000005020	13	-1	SKAP2	protein_coding	155239
chr7	26840000	27160000	chr7	27107777	27134302	ENSG00000253552	8	1	HOXA-AS2	lncRNA	26525
chr7	26840000	27160000	chr7	27128969	27152561	ENSG00000273433	1	-1		lncRNA	23592
chr7	26840000	27160000	chr7	27129977	27155928	ENSG00000254369	6	1	HOXA-AS3	lncRNA	25951
chr7	26840000	27160000	chr7	27106184	27152583	ENSG00000105997	23	-1	HOXA3	protein_coding	46399
chr7	27160000	28120000	chr7	27168619	27171915	ENSG00000253187	2	1	HOXA10-AS	lncRNA	3296
chr7	27160000	28120000	chr7	27169480	27169563	ENSG00000283745	1	-1	MIR196B	miRNA	83
chr7	27160000	28120000	chr7	27170605	27180261	ENSG00000253293	6	-1	HOXA10	protein_coding	9656
chr7	27160000	28120000	chr7	27181157	27185232	ENSG00000005073	6	-1	HOXA11	protein_coding	4075
chr7	27160000	28120000	chr7	27184507	27189298	ENSG00000240990	10	1	HOXA11-AS	lncRNA	4791
chr7	27160000	28120000	chr7	27185433	27185530	ENSG00000273961	1	1		misc_RNA	97
chr7	27160000	28120000	chr7	27185832	27186018	ENSG00000278334	1	1		misc_RNA	186
chr7	27160000	28120000	chr7	27186166	27186263	ENSG00000276496	1	1		misc_RNA	97
chr7	27160000	28120000	chr7	27186573	27193448	ENSG00000253508	1	-1		lncRNA	6875
chr7	27160000	28120000	chr7	27186892	27187124	ENSG00000277966	1	1		misc_RNA	232
chr7	27160000	28120000	chr7	27187819	27188021	ENSG00000278592	1	1		misc_RNA	202
chr7	27160000	28120000	chr7	27188816	27188994	ENSG00000278020	1	1		misc_RNA	178
chr7	27160000	28120000	chr7	27198575	27207259	ENSG00000243766	8	1	HOTTIP	lncRNA	8684
chr7	27160000	28120000	chr7	27200465	27200521	ENSG00000276609	1	1		misc_RNA	56
chr7	27160000	28120000	chr7	27201844	27202219	ENSG00000278708	1	1		misc_RNA	375
chr7	27160000	28120000	chr7	27202302	27202638	ENSG00000277469	1	1		misc_RNA	336
chr7	27160000	28120000	chr7	27206139	27206303	ENSG00000277553	1	1		misc_RNA	164
chr7	27160000	28120000	chr7	27210801	27212965	ENSG00000286323	1	-1		lncRNA	2164
chr7	27160000	28120000	chr7	27239243	27241228	ENSG00000253308	2	-1		lncRNA	1985
chr7	27160000	28120000	chr7	27269357	27269678	ENSG00000213783	4	-1	RPL35P4	processed_pseudogene	321
chr7	27160000	28120000	chr7	27328607	27329534	ENSG00000236569	3	-1	HNRNPA1P73	processed_pseudogene	927
chr7	27160000	28120000	chr7	27380562	27381206	ENSG00000279655	1	1		TEC	644
chr7	27160000	28120000	chr7	27412164	27412891	ENSG00000279429	1	1		TEC	727
chr7	27160000	28120000	chr7	27458163	27458849	ENSG00000233830	2	-1	EIF4HP1	processed_pseudogene	686
chr7	27160000	28120000	chr7	27461766	27462969	ENSG00000213781	3	1	PSMC1P2	processed_pseudogene	1203
chr7	27160000	28120000	chr7	27873785	27876546	ENSG00000287489	1	1		lncRNA	2761
chr7	27160000	28120000	chr7	28118113	28118219	ENSG00000206623	1	-1	RNU6-979P	snRNA	106
chr7	27160000	28120000	chr7	27162438	27175180	ENSG00000078399	19	-1	HOXA9	protein_coding	12742
chr7	27160000	28120000	chr7	27163535	27180013	ENSG00000257184	3	-1		protein_coding	16478
chr7	27160000	28120000	chr7	27193503	27200091	ENSG00000106031	9	-1	HOXA13	protein_coding	6588
chr7	27160000	28120000	chr7	27241429	27247229	ENSG00000253405	1	-1	EVX1-AS	lncRNA	5800
chr7	27160000	28120000	chr7	27242700	27250493	ENSG00000106038	13	1	EVX1	protein_coding	7793
chr7	27160000	28120000	chr7	27491682	27492765	ENSG00000235574	1	-1		processed_pseudogene	1083
chr7	27160000	28120000	chr7	27617474	27627496	ENSG00000286478	1	1		lncRNA	10022
chr7	27160000	28120000	chr7	27733064	27740395	ENSG00000229893	2	-1	TAX1BP1-AS1	lncRNA	7331
chr7	27160000	28120000	chr7	27525442	27662883	ENSG00000106049	9	-1	HIBADH	protein_coding	137441
chr7	27160000	28120000	chr7	27739331	27844564	ENSG00000106052	14	1	TAX1BP1	protein_coding	105233
chr7	27160000	28120000	chr7	27830573	28180795	ENSG00000153814	13	-1	JAZF1	protein_coding	289427
chr7	27160000	28120000	chr7	27361591	27410358	ENSG00000224322	2	1		lncRNA	48767
chr7	75400000	76520000	chr7	75513025	75513126	ENSG00000200874	1	-1	Y_RNA	misc_RNA	101
chr7	75400000	76520000	chr7	75625089	75626970	ENSG00000279996	1	-1		TEC	1881
chr7	75400000	76520000	chr7	75810825	75823356	ENSG00000106178	7	-1	CCL24	protein_coding	12531
chr7	75400000	76520000	chr7	75835663	75836141	ENSG00000219039	2	1		processed_pseudogene	478
chr7	75400000	76520000	chr7	75915197	75915269	ENSG00000284334	1	1	MIR4651	miRNA	72
chr7	75400000	76520000	chr7	75922755	75923443	ENSG00000235090	1	1	RPL7L1P3	processed_pseudogene	688
chr7	75400000	76520000	chr7	75943782	75943916	ENSG00000201643	1	1	SNORA14A	snoRNA	134
chr7	75400000	76520000	chr7	76043977	76045963	ENSG00000280388	1	-1		TEC	1986
chr7	75400000	76520000	chr7	76071469	76074963	ENSG00000230882	1	-1		processed_pseudogene	3494
chr7	75400000	76520000	chr7	76087444	76087547	ENSG00000251798	1	1	RNU6-863P	snRNA	103
chr7	75400000	76520000	chr7	76099440	76101408	ENSG00000227038	4	-1	GTF2IP7	transcribed_unprocessed_pseudogene	1968
chr7	75400000	76520000	chr7	76113026	76113400	ENSG00000213549	3	-1		processed_pseudogene	374
chr7	75400000	76520000	chr7	76173733	76175573	ENSG00000228829	2	1		transcribed_unprocessed_pseudogene	1840
chr7	75400000	76520000	chr7	76174309	76177205	ENSG00000290730	1	1		lncRNA	2896
chr7	75400000	76520000	chr7	76302673	76304295	ENSG00000106211	10	1	HSPB1	protein_coding	1622
chr7	75400000	76520000	chr7	76318253	76319790	ENSG00000289059	1	1		lncRNA	1537
chr7	75400000	76520000	chr7	76361768	76362113	ENSG00000213548	3	1	PPIAP81	processed_pseudogene	345
chr7	75400000	76520000	chr7	76470162	76471058	ENSG00000233980	1	-1	FDPSP2	processed_pseudogene	896
chr7	75400000	76520000	chr7	76474587	76478856	ENSG00000250614	1	-1		lncRNA	4269
chr7	75400000	76520000	chr7	75416786	75486299	ENSG00000272391	6	-1	POM121C	protein_coding	69513
chr7	75400000	76520000	chr7	75474707	75486108	ENSG00000242073	2	-1		transcribed_unprocessed_pseudogene	11401
chr7	75400000	76520000	chr7	75395063	75410996	ENSG00000178809	12	1	TRIM73	protein_coding	10996
chr7	75400000	76520000	chr7	75410368	75416597	ENSG00000223705	12	1	NSUN5P1	transcribed_unprocessed_pseudogene	6229
chr7	75400000	76520000	chr7	75410322	75416794	ENSG00000291151	1	1	NSUN5P1	lncRNA	6472
chr7	75400000	76520000	chr7	75510931	75516235	ENSG00000127957	21	-1	PMS2P3	transcribed_unprocessed_pseudogene	5304
chr7	75400000	76520000	chr7	75507747	75528148	ENSG00000291092	1	-1	PMS2P3	lncRNA	20401
chr7	75400000	76520000	chr7	75769533	75789896	ENSG00000006606	9	-1	CCL26	protein_coding	20363
chr7	75400000	76520000	chr7	75842602	75888926	ENSG00000005486	17	1	RHBDD2	protein_coding	46324
chr7	75400000	76520000	chr7	75986831	75994656	ENSG00000189077	11	-1	TMEM120A	protein_coding	7825
chr7	75400000	76520000	chr7	75899200	75986855	ENSG00000127948	17	1	POR	protein_coding	87655
chr7	75400000	76520000	chr7	76108434	76132187	ENSG00000224273	2	-1	RABGEF1P3	transcribed_unprocessed_pseudogene	23753
chr7	75400000	76520000	chr7	76048051	76067508	ENSG00000146701	12	1	MDH2	protein_coding	19457
chr7	75400000	76520000	chr7	76090431	76108779	ENSG00000290729	1	-1		lncRNA	18348
chr7	75400000	76520000	chr7	76326799	76358991	ENSG00000170027	7	-1	YWHAG	protein_coding	32192
chr7	75400000	76520000	chr7	76389334	76409697	ENSG00000146700	9	-1	SSC4D	protein_coding	20363
chr7	75400000	76520000	chr7	76461676	76505995	ENSG00000091073	20	1	DTX2	protein_coding	44319
chr7	75400000	76520000	chr7	76510525	76516522	ENSG00000243566	7	1	UPK3B	protein_coding	5997
chr7	75400000	76520000	chr7	76201896	76287288	ENSG00000177679	16	1	SRRM3	protein_coding	85392
chr7	75400000	76520000	chr7	76397518	76442071	ENSG00000188372	15	1	ZP3	protein_coding	44553
chr7	75400000	76520000	chr7	75533298	75738962	ENSG00000127946	17	-1	HIP1	protein_coding	205664
chr7	75400000	76520000	chr7	75996338	76048004	ENSG00000127952	17	-1	STYXL1	protein_coding	51666
chr7	75400000	76520000	chr7	75492320	75504316	ENSG00000170092	15	1	SPDYE5	protein_coding	11996
chr7	116120000	117160000	chr7	116209234	116211511	ENSG00000279086	1	-1		TEC	2277
chr7	116120000	117160000	chr7	116320751	116321031	ENSG00000213167	3	1	Metazoa_SRP	misc_RNA	280
chr7	116120000	117160000	chr7	116542718	116551969	ENSG00000235427	1	-1		lncRNA	9251
chr7	116120000	117160000	chr7	116873454	116876376	ENSG00000235945	1	-1		processed_pseudogene	2922
chr7	116120000	117160000	chr7	116909877	116909964	ENSG00000252115	1	-1	Y_RNA	misc_RNA	87
chr7	116120000	117160000	chr7	116944286	116944414	ENSG00000222150	1	-1	RNA5SP239	rRNA_pseudogene	128
chr7	116120000	117160000	chr7	116952446	116954334	ENSG00000227199	1	-1	ST7-AS1	lncRNA	1888
chr7	116120000	117160000	chr7	116952698	116952813	ENSG00000275359	1	1		misc_RNA	115
chr7	116120000	117160000	chr7	116953214	116953324	ENSG00000277583	1	1		misc_RNA	110
chr7	116120000	117160000	chr7	116954480	116954679	ENSG00000273596	1	1		misc_RNA	199
chr7	116120000	117160000	chr7	116954983	116955154	ENSG00000273571	1	1		misc_RNA	171
chr7	116120000	117160000	chr7	116956431	116956723	ENSG00000276100	1	1		misc_RNA	292
chr7	116120000	117160000	chr7	116959593	116959805	ENSG00000274606	1	1		misc_RNA	212
chr7	116120000	117160000	chr7	116965846	116967472	ENSG00000228368	1	-1		lncRNA	1626
chr7	116120000	117160000	chr7	116972165	116972911	ENSG00000213050	5	-1	TPM3P1	processed_pseudogene	746
chr7	116120000	117160000	chr7	117020211	117020319	ENSG00000283923	1	1	MIR6132	miRNA	108
chr7	116120000	117160000	chr7	117117912	117117983	ENSG00000274344	1	1		misc_RNA	71
chr7	116120000	117160000	chr7	116210506	116258783	ENSG00000135269	18	1	TES	protein_coding	48277
chr7	116120000	117160000	chr7	116275606	116286734	ENSG00000237870	6	-1		lncRNA	11128
chr7	116120000	117160000	chr7	116524994	116561179	ENSG00000105974	13	1	CAV1	protein_coding	36185
chr7	116120000	117160000	chr7	117072072	117146480	ENSG00000226367	6	-1	ST7-AS2	lncRNA	74408
chr7	116120000	117160000	chr7	117091678	117097262	ENSG00000287829	1	-1		lncRNA	5584
chr7	116120000	117160000	chr7	116237929	116327896	ENSG00000243243	5	-1		lncRNA	89967
chr7	116120000	117160000	chr7	115935148	116159896	ENSG00000105967	16	-1	TFEC	protein_coding	39896
chr7	116120000	117160000	chr7	116953899	117098806	ENSG00000214188	9	1	ST7-OT4	lncRNA	144907
chr7	116120000	117160000	chr7	116954391	117119719	ENSG00000288635	1	1		protein_coding	165328
chr7	116120000	117160000	chr7	116953238	117230176	ENSG00000004866	22	1	ST7	protein_coding	206762
chr7	116120000	117160000	chr7	116563594	116663829	ENSG00000231210	3	-1	COMETT	lncRNA	100235
chr7	116120000	117160000	chr7	116811070	116922049	ENSG00000198898	16	1	CAPZA2	protein_coding	110979
chr7	116120000	117160000	chr7	116672196	116798377	ENSG00000105976	16	1	MET	protein_coding	126181
chr7	116120000	117160000	chr7	116238260	116499465	ENSG00000237813	4	-1		lncRNA	261205
chr7	116120000	117160000	chr7	116287380	116508541	ENSG00000105971	15	1	CAV2	protein_coding	221161
chr7	120760000	122040000	chr7	120981426	120981553	ENSG00000202225	1	-1	RNA5SP240	rRNA_pseudogene	127
chr7	120760000	122040000	chr7	121050927	121051203	ENSG00000234927	1	1	HMGN1P18	processed_pseudogene	276
chr7	120760000	122040000	chr7	121083700	121083813	ENSG00000212628	1	-1	RNA5SP241	rRNA_pseudogene	113
chr7	120760000	122040000	chr7	121194948	121195057	ENSG00000207090	1	-1	RNU6-517P	snRNA	109
chr7	120760000	122040000	chr7	121398452	121398767	ENSG00000213310	3	1	CYCSP19	processed_pseudogene	315
chr7	120760000	122040000	chr7	121419072	121419845	ENSG00000227371	1	1		processed_pseudogene	773
chr7	120760000	122040000	chr7	121440834	121441261	ENSG00000234985	2	-1		processed_pseudogene	427
chr7	120760000	122040000	chr7	121736443	121736725	ENSG00000252704	1	1	RN7SKP277	misc_RNA	282
chr7	120760000	122040000	chr7	121842368	121845131	ENSG00000233272	1	-1	PNPT1P2	processed_pseudogene	2763
chr7	120760000	122040000	chr7	120950763	120977216	ENSG00000071243	16	1	ING3	protein_coding	26453
chr7	120760000	122040000	chr7	121304657	121309842	ENSG00000287554	1	-1		lncRNA	5185
chr7	120760000	122040000	chr7	121325367	121341104	ENSG00000002745	13	1	WNT16	protein_coding	15737
chr7	120760000	122040000	chr7	121643334	121686363	ENSG00000227743	2	-1		lncRNA	43029
chr7	120760000	122040000	chr7	121348878	121396364	ENSG00000196937	11	-1	FAM3C	protein_coding	47486
chr7	120760000	122040000	chr7	120787320	120858402	ENSG00000106025	9	-1	TSPAN12	protein_coding	71082
chr7	120760000	122040000	chr7	120988697	121297442	ENSG00000106034	18	1	CPED1	protein_coding	308745
chr7	120760000	122040000	chr7	121450948	121511194	ENSG00000289578	1	-1		lncRNA	60246
chr7	120760000	122040000	chr7	121873089	122062036	ENSG00000106278	12	1	PTPRZ1	protein_coding	166911
chr7	130040000	130840000	chr7	130141707	130142618	ENSG00000229196	4	1	LINC03008	lncRNA	911
chr7	130040000	130840000	chr7	130206344	130216844	ENSG00000165120	5	1	SSMEM1	protein_coding	10500
chr7	130040000	130840000	chr7	130255902	130262770	ENSG00000270992	1	1		processed_pseudogene	6868
chr7	130040000	130840000	chr7	130486042	130491033	ENSG00000272701	3	-1	MESTIT1	lncRNA	4991
chr7	130040000	130840000	chr7	130487483	130487622	ENSG00000277269	1	1		misc_RNA	139
chr7	130040000	130840000	chr7	130488304	130488538	ENSG00000278055	1	1		misc_RNA	234
chr7	130040000	130840000	chr7	130489868	130489966	ENSG00000274500	1	1		misc_RNA	98
chr7	130040000	130840000	chr7	130495794	130498427	ENSG00000270823	1	-1		lncRNA	2633
chr7	130040000	130840000	chr7	130496111	130496204	ENSG00000199043	1	1	MIR335	miRNA	93
chr7	130040000	130840000	chr7	130507660	130508282	ENSG00000270953	1	1		lncRNA	622
chr7	130040000	130840000	chr7	130538954	130546900	ENSG00000286214	1	1	COPG2IT1	lncRNA	7946
chr7	130040000	130840000	chr7	130602795	130602913	ENSG00000239021	1	-1	RNA5SP246	rRNA_pseudogene	118
chr7	130040000	130840000	chr7	130645225	130645594	ENSG00000226045	1	-1		processed_pseudogene	369
chr7	130040000	130840000	chr7	130668852	130669395	ENSG00000287547	1	1		lncRNA	543
chr7	130040000	130840000	chr7	130730697	130734207	ENSG00000266265	4	-1	KLF14	protein_coding	3510
chr7	130040000	130840000	chr7	130790208	130791724	ENSG00000271522	1	1		lncRNA	1516
chr7	130040000	130840000	chr7	130822868	130823219	ENSG00000229858	2	-1		processed_pseudogene	351
chr7	130040000	130840000	chr7	130823205	130823511	ENSG00000240680	1	-1	H4P1	processed_pseudogene	306
chr7	130040000	130840000	chr7	130070534	130135705	ENSG00000128607	14	1	KLHDC10	protein_coding	65171
chr7	130040000	130840000	chr7	130164713	130207770	ENSG00000146842	17	-1	TMEM209	protein_coding	43057
chr7	130040000	130840000	chr7	130173718	130205361	ENSG00000240571	1	1		lncRNA	31643
chr7	130040000	130840000	chr7	130293134	130324180	ENSG00000128510	12	1	CPA4	protein_coding	31046
chr7	130040000	130840000	chr7	130344816	130368730	ENSG00000158525	16	1	CPA5	protein_coding	23914
chr7	130040000	130840000	chr7	130380339	130388114	ENSG00000091704	10	1	CPA1	protein_coding	7775
chr7	130040000	130840000	chr7	130481491	130484392	ENSG00000259920	1	-1		lncRNA	2901
chr7	130040000	130840000	chr7	130486171	130506465	ENSG00000106484	16	1	MEST	protein_coding	20294
chr7	130040000	130840000	chr7	130506238	130668748	ENSG00000158623	14	-1	COPG2	protein_coding	162510
chr7	130040000	130840000	chr7	130266863	130289798	ENSG00000158516	12	1	CPA2	protein_coding	22935
chr7	130040000	130840000	chr7	130393771	130442433	ENSG00000106477	20	-1	CEP41	protein_coding	48662
chr7	130040000	130840000	chr7	130668643	130687432	ENSG00000213265	9	-1	TSGA13	protein_coding	18789
chr7	130040000	130840000	chr7	130018287	130051451	ENSG00000091732	17	-1	ZC3HC1	protein_coding	11451
chr7	130040000	130840000	chr7	130791264	131110176	ENSG00000231721	8	-1	LINC-PINT	lncRNA	48736
chr8	6400000	7400000	chr8	6473845	6474288	ENSG00000253550	1	-1		processed_pseudogene	443
chr8	6400000	7400000	chr8	6572571	6576219	ENSG00000288076	1	-1		lncRNA	3648
chr8	6400000	7400000	chr8	6615604	6617198	ENSG00000271743	1	-1		lncRNA	1594
chr8	6400000	7400000	chr8	6622124	6622220	ENSG00000276580	1	-1	MIR8055	miRNA	96
chr8	6400000	7400000	chr8	6745164	6745244	ENSG00000266038	1	1	MIR4659A	miRNA	80
chr8	6400000	7400000	chr8	6745168	6745240	ENSG00000283386	1	-1	MIR4659B	miRNA	72
chr8	6400000	7400000	chr8	6870592	6877936	ENSG00000164825	4	-1	DEFB1	protein_coding	7344
chr8	6400000	7400000	chr8	6898878	6899468	ENSG00000250752	2	-1	RPL23AP96	processed_pseudogene	590
chr8	6400000	7400000	chr8	6924697	6926076	ENSG00000164822	5	-1	DEFA6	protein_coding	1379
chr8	6400000	7400000	chr8	6935820	6938306	ENSG00000164821	5	-1	DEFA4	protein_coding	2486
chr8	6400000	7400000	chr8	6950726	6951599	ENSG00000223629	1	-1	DEFA8P	unprocessed_pseudogene	873
chr8	6400000	7400000	chr8	6959289	6960161	ENSG00000233238	1	-1	DEFA9P	unprocessed_pseudogene	872
chr8	6400000	7400000	chr8	6968141	6969113	ENSG00000233531	1	-1	DEFA10P	unprocessed_pseudogene	972
chr8	6400000	7400000	chr8	6987368	6988274	ENSG00000215378	4	-1	DEFT1P	unprocessed_pseudogene	906
chr8	6400000	7400000	chr8	6996766	6999198	ENSG00000240247	8	-1	DEFA1B	protein_coding	2432
chr8	6400000	7400000	chr8	7006471	7007389	ENSG00000232039	3	-1	DEFT1P2	unprocessed_pseudogene	918
chr8	6400000	7400000	chr8	7015869	7018297	ENSG00000239839	7	-1	DEFA3	protein_coding	2428
chr8	6400000	7400000	chr8	7038571	7039439	ENSG00000206042	1	-1	DEFA7P	unprocessed_pseudogene	868
chr8	6400000	7400000	chr8	7055304	7056739	ENSG00000164816	8	-1	DEFA5	protein_coding	1435
chr8	6400000	7400000	chr8	7082971	7083328	ENSG00000255273	1	1	VPS51P14	processed_pseudogene	357
chr8	6400000	7400000	chr8	7092102	7092320	ENSG00000284620	3	1		transcribed_unprocessed_pseudogene	218
chr8	6400000	7400000	chr8	7112314	7113728	ENSG00000234120	1	-1		processed_pseudogene	1414
chr8	6400000	7400000	chr8	7122857	7123704	ENSG00000228744	1	1	RPS3AP30	processed_pseudogene	847
chr8	6400000	7400000	chr8	7143632	7143841	ENSG00000254683	1	-1	SNRPCP6	processed_pseudogene	209
[truncated: 4,070 more rows]

## Sheet: CRC6
chr2	87960000	92080000	chr2	88857161	88857683	ENSG00000211592	8	-1	IGKC	IG_C_gene	522
chr22	21520000	23960000	chr22	22895375	22895834	ENSG00000211675	2	1	IGLC1	IG_C_gene	459
chr22	21520000	23960000	chr22	22900976	22901437	ENSG00000211677	2	1	IGLC2	IG_C_gene	461
chr22	21520000	23960000	chr22	22906342	22906803	ENSG00000211679	2	1	IGLC3	IG_C_gene	461
chr22	21520000	23960000	chr22	22922594	22923034	ENSG00000211685	3	1	IGLC7	IG_C_gene	440
chr18	3240000	4080000	chr18	3394889	3395312	ENSG00000265243	1	1	IGLJCOR18	IG_C_pseudogene	423
chr22	21520000	23960000	chr22	22910828	22911075	ENSG00000254029	1	1	IGLC4	IG_C_pseudogene	247
chr22	21520000	23960000	chr22	22915635	22915927	ENSG00000254030	1	1	IGLC5	IG_C_pseudogene	292
chr22	21520000	23960000	chr22	22919535	22919851	ENSG00000222037	5	1	IGLC6	IG_C_pseudogene	316
chr2	87960000	92080000	chr2	88860568	88860605	ENSG00000211593	2	-1	IGKJ5	IG_J_gene	37
chr2	87960000	92080000	chr2	88860886	88860922	ENSG00000211594	2	-1	IGKJ4	IG_J_gene	36
chr2	87960000	92080000	chr2	88861221	88861258	ENSG00000211595	2	-1	IGKJ3	IG_J_gene	37
chr2	87960000	92080000	chr2	88861525	88861563	ENSG00000211596	3	-1	IGKJ2	IG_J_gene	38
chr2	87960000	92080000	chr2	88861886	88861923	ENSG00000211597	2	-1	IGKJ1	IG_J_gene	37
chr22	21520000	23960000	chr22	22893692	22893818	ENSG00000211674	2	1	IGLJ1	IG_J_gene	126
chr22	21520000	23960000	chr22	22899481	22899655	ENSG00000211676	2	1	IGLJ2	IG_J_gene	174
chr22	21520000	23960000	chr22	22904850	22905025	ENSG00000211678	2	1	IGLJ3	IG_J_gene	175
chr22	21520000	23960000	chr22	22910574	22910606	ENSG00000211680	2	1	IGLJ4	IG_J_gene	32
chr22	21520000	23960000	chr22	22914237	22914308	ENSG00000211681	2	1	IGLJ5	IG_J_gene	71
chr22	21520000	23960000	chr22	22918132	22918201	ENSG00000211682	2	1	IGLJ6	IG_J_gene	69
chr22	21520000	23960000	chr22	22921390	22921435	ENSG00000211684	2	1	IGLJ7	IG_J_gene	45
chr2	87960000	92080000	chr2	88897232	88897784	ENSG00000211599	2	1	IGKV5-2	IG_V_gene	552
chr2	87960000	92080000	chr2	88885397	88886153	ENSG00000211598	2	1	IGKV4-1	IG_V_gene	756
chr2	87960000	92080000	chr2	88947301	88947957	ENSG00000243466	1	-1	IGKV1-5	IG_V_gene	656
chr2	87960000	92080000	chr2	88966262	88966767	ENSG00000239855	1	-1	IGKV1-6	IG_V_gene	505
chr2	87960000	92080000	chr2	88978468	88979081	ENSG00000243063	1	-1	IGKV3-7	IG_V_gene	613
chr2	87960000	92080000	chr2	88992409	88992931	ENSG00000240671	4	-1	IGKV1-8	IG_V_gene	522
chr2	87960000	92080000	chr2	89009982	89010515	ENSG00000241755	1	-1	IGKV1-9	IG_V_gene	533
chr2	87960000	92080000	chr2	89027171	89027731	ENSG00000241351	3	-1	IGKV3-11	IG_V_gene	560
chr2	87960000	92080000	chr2	89040224	89040745	ENSG00000243290	3	-1	IGKV1-12	IG_V_gene	521
chr2	87960000	92080000	chr2	89085177	89085787	ENSG00000244437	1	-1	IGKV3-15	IG_V_gene	610
chr2	87960000	92080000	chr2	89099859	89100361	ENSG00000240864	3	-1	IGKV1-16	IG_V_gene	502
chr2	87960000	92080000	chr2	89117342	89117844	ENSG00000240382	3	-1	IGKV1-17	IG_V_gene	502
chr2	87960000	92080000	chr2	89142574	89143160	ENSG00000239951	1	-1	IGKV3-20	IG_V_gene	586
chr2	87960000	92080000	chr2	89159751	89160366	ENSG00000211611	2	-1	IGKV6-21	IG_V_gene	615
chr2	87960000	92080000	chr2	89176328	89177160	ENSG00000241294	1	-1	IGKV2-24	IG_V_gene	832
chr2	87960000	92080000	chr2	89213423	89213928	ENSG00000244575	3	-1	IGKV1-27	IG_V_gene	505
chr2	87960000	92080000	chr2	89221698	89222461	ENSG00000244116	3	-1	IGKV2-28	IG_V_gene	763
chr2	87960000	92080000	chr2	89244781	89245596	ENSG00000243238	1	-1	IGKV2-30	IG_V_gene	815
chr2	87960000	92080000	chr2	89268001	89268506	ENSG00000242076	3	-1	IGKV1-33	IG_V_gene	505
chr2	87960000	92080000	chr2	89297264	89297785	ENSG00000239862	1	-1	IGKV1-37	IG_V_gene	521
chr2	87960000	92080000	chr2	89319625	89320146	ENSG00000242371	1	-1	IGKV1-39	IG_V_gene	521
chr2	87960000	92080000	chr2	89330116	89330429	ENSG00000273962	2	-1	IGKV2-40	IG_V_gene	313
chr2	87960000	92080000	chr2	89851791	89852493	ENSG00000251039	3	1	IGKV2D-40	IG_V_gene	702
chr2	87960000	92080000	chr2	89862482	89862981	ENSG00000251546	1	1	IGKV1D-39	IG_V_gene	499
chr2	87960000	92080000	chr2	89884740	89885216	ENSG00000250036	1	1	IGKV1D-37	IG_V_gene	476
chr2	87960000	92080000	chr2	89913982	89914545	ENSG00000239975	3	1	IGKV1D-33	IG_V_gene	563
chr2	87960000	92080000	chr2	89936859	89937679	ENSG00000239571	1	1	IGKV2D-30	IG_V_gene	820
chr2	87960000	92080000	chr2	89959979	89960748	ENSG00000242534	3	1	IGKV2D-28	IG_V_gene	769
chr2	87960000	92080000	chr2	89985922	89986702	ENSG00000211623	2	1	IGKV2D-26	IG_V_gene	780
chr2	87960000	92080000	chr2	90004797	90005629	ENSG00000241566	1	1	IGKV2D-24	IG_V_gene	832
chr2	87960000	92080000	chr2	90021567	90022185	ENSG00000225523	2	1	IGKV6D-21	IG_V_gene	618
chr2	87960000	92080000	chr2	90038848	90039479	ENSG00000211625	2	1	IGKV3D-20	IG_V_gene	631
chr2	87960000	92080000	chr2	90069662	90070238	ENSG00000211626	2	1	IGKV6D-41	IG_V_gene	576
chr2	87960000	92080000	chr2	90082635	90083291	ENSG00000242766	1	1	IGKV1D-17	IG_V_gene	656
chr2	87960000	92080000	chr2	90100236	90100738	ENSG00000241244	1	1	IGKV1D-16	IG_V_gene	502
chr2	87960000	92080000	chr2	90114838	90115402	ENSG00000224041	3	1	IGKV3D-15	IG_V_gene	564
chr2	87960000	92080000	chr2	90154073	90154574	ENSG00000276566	1	1	IGKV1D-13	IG_V_gene	501
chr2	87960000	92080000	chr2	90159840	90160335	ENSG00000278857	1	1	IGKV1D-12	IG_V_gene	495
chr2	87960000	92080000	chr2	90172802	90173414	ENSG00000211632	4	1	IGKV3D-11	IG_V_gene	612
chr2	87960000	92080000	chr2	90190193	90190681	ENSG00000211633	3	1	IGKV1D-42	IG_V_gene	488
chr2	87960000	92080000	chr2	90220727	90221384	ENSG00000239819	2	1	IGKV1D-8	IG_V_gene	657
chr2	87960000	92080000	chr2	90234812	90235370	ENSG00000228325	5	1	IGKV3D-7	IG_V_gene	558
chr2	87960000	92080000	chr2	89947512	89948269	ENSG00000243264	3	1	IGKV2D-29	IG_V_gene	757
chr2	87960000	92080000	chr2	90209873	90210529	ENSG00000242580	1	1	IGKV1D-43	IG_V_gene	656
chr2	111800000	113440000	chr2	113406396	113406872	ENSG00000231292	6	1	IGKV1OR2-108	IG_V_gene	476
chr22	21520000	23960000	chr22	22030934	22031472	ENSG00000211637	2	1	IGLV4-69	IG_V_gene	538
chr22	21520000	23960000	chr22	22098700	22099212	ENSG00000211638	2	1	IGLV8-61	IG_V_gene	512
chr22	21520000	23960000	chr22	22162199	22162681	ENSG00000211639	2	1	IGLV4-60	IG_V_gene	482
chr22	21520000	23960000	chr22	22195799	22196276	ENSG00000211640	4	1	IGLV6-57	IG_V_gene	477
chr22	21520000	23960000	chr22	22214794	22215270	ENSG00000211642	4	1	IGLV10-54	IG_V_gene	476
chr22	21520000	23960000	chr22	22201663	22202161	ENSG00000211641	3	1	IGLV11-55	IG_V_gene	498
chr22	21520000	23960000	chr22	22318727	22319226	ENSG00000211643	2	1	IGLV5-52	IG_V_gene	499
chr22	21520000	23960000	chr22	22322472	22322969	ENSG00000211644	3	1	IGLV1-51	IG_V_gene	497
chr22	21520000	23960000	chr22	22327300	22327814	ENSG00000211645	2	1	IGLV1-50	IG_V_gene	514
chr22	21520000	23960000	chr22	22343187	22343732	ENSG00000223350	2	1	IGLV9-49	IG_V_gene	545
chr22	21520000	23960000	chr22	22352940	22353433	ENSG00000211647	1	1	IGLV5-48	IG_V_gene	493
chr22	21520000	23960000	chr22	22357739	22358260	ENSG00000211648	2	1	IGLV1-47	IG_V_gene	521
chr22	21520000	23960000	chr22	22369614	22370087	ENSG00000211649	3	1	IGLV7-46	IG_V_gene	473
chr22	21520000	23960000	chr22	22375986	22376505	ENSG00000211650	2	1	IGLV5-45	IG_V_gene	519
chr22	21520000	23960000	chr22	22380766	22381347	ENSG00000211651	3	1	IGLV1-44	IG_V_gene	581
chr22	21520000	23960000	chr22	22395018	22395489	ENSG00000211652	2	1	IGLV7-43	IG_V_gene	471
chr22	21520000	23960000	chr22	22409766	22410282	ENSG00000211653	2	1	IGLV1-40	IG_V_gene	516
chr22	21520000	23960000	chr22	22427540	22428035	ENSG00000211654	2	1	IGLV5-37	IG_V_gene	495
chr22	21520000	23960000	chr22	22431958	22432465	ENSG00000211655	3	1	IGLV1-36	IG_V_gene	507
chr22	21520000	23960000	chr22	22588155	22588688	ENSG00000211656	3	1	IGLV2-33	IG_V_gene	533
chr22	21520000	23960000	chr22	22594528	22595056	ENSG00000211657	3	1	IGLV3-32	IG_V_gene	528
chr22	21520000	23960000	chr22	22668288	22668806	ENSG00000211658	2	1	IGLV3-27	IG_V_gene	518
chr22	21520000	23960000	chr22	22686726	22687271	ENSG00000211659	2	1	IGLV3-25	IG_V_gene	545
chr22	21520000	23960000	chr22	22697789	22698407	ENSG00000211660	3	1	IGLV2-23	IG_V_gene	618
chr22	21520000	23960000	chr22	22704265	22704822	ENSG00000211661	2	1	IGLV3-22	IG_V_gene	557
chr22	21520000	23960000	chr22	22711689	22713203	ENSG00000211662	2	1	IGLV3-21	IG_V_gene	1514
chr22	21520000	23960000	chr22	22720623	22721145	ENSG00000211663	2	1	IGLV3-19	IG_V_gene	522
chr22	21520000	23960000	chr22	22734607	22735089	ENSG00000211664	3	1	IGLV2-18	IG_V_gene	482
chr22	21520000	23960000	chr22	22747383	22747921	ENSG00000211665	3	1	IGLV3-16	IG_V_gene	538
chr22	21520000	23960000	chr22	22771824	22772582	ENSG00000211667	3	1	IGLV3-12	IG_V_gene	758
chr22	21520000	23960000	chr22	22758700	22759218	ENSG00000211666	2	1	IGLV2-14	IG_V_gene	518
chr22	21520000	23960000	chr22	22792491	22793007	ENSG00000211668	2	1	IGLV2-11	IG_V_gene	516
chr22	21520000	23960000	chr22	22811747	22812281	ENSG00000211669	3	1	IGLV3-10	IG_V_gene	534
chr22	21520000	23960000	chr22	22819010	22819756	ENSG00000211670	2	1	IGLV3-9	IG_V_gene	746
chr22	21520000	23960000	chr22	22871507	22872035	ENSG00000211672	2	1	IGLV4-3	IG_V_gene	528
chr22	21520000	23960000	chr22	22880706	22881396	ENSG00000211673	2	1	IGLV3-1	IG_V_gene	690
chr22	21520000	23960000	chr22	22822658	22823289	ENSG00000278196	3	1	IGLV2-8	IG_V_gene	631
chr2	87960000	92080000	chr2	88915081	88915378	ENSG00000197794	2	-1	IGKV7-3	IG_V_pseudogene	297
chr2	87960000	92080000	chr2	89019992	89020686	ENSG00000253278	1	-1	IGKV2-10	IG_V_pseudogene	694
chr2	87960000	92080000	chr2	89045995	89046466	ENSG00000253497	1	-1	IGKV1-13	IG_V_pseudogene	471
chr2	87960000	92080000	chr2	89078010	89078784	ENSG00000253265	1	-1	IGKV2-14	IG_V_pseudogene	774
chr2	87960000	92080000	chr2	89134975	89135257	ENSG00000253732	1	-1	IGKV2-19	IG_V_pseudogene	282
chr2	87960000	92080000	chr2	89170775	89171212	ENSG00000253578	1	-1	IGKV1-22	IG_V_pseudogene	437
chr2	87960000	92080000	chr2	89172022	89172553	ENSG00000253625	1	-1	IGKV2-23	IG_V_pseudogene	531
chr2	87960000	92080000	chr2	89192500	89192752	ENSG00000253202	1	-1	IGKV3-25	IG_V_pseudogene	252
chr2	87960000	92080000	chr2	89196096	89196829	ENSG00000254098	1	-1	IGKV2-26	IG_V_pseudogene	733
chr2	87960000	92080000	chr2	89234174	89234912	ENSG00000253998	3	-1	IGKV2-29	IG_V_pseudogene	738
chr2	87960000	92080000	chr2	89252211	89252736	ENSG00000253158	1	-1	IGKV3-31	IG_V_pseudogene	525
chr2	87960000	92080000	chr2	89253571	89254015	ENSG00000253870	1	-1	IGKV1-32	IG_V_pseudogene	444
chr2	87960000	92080000	chr2	89275298	89275787	ENSG00000253860	1	-1	IGKV3-34	IG_V_pseudogene	489
chr2	87960000	92080000	chr2	89286689	89286973	ENSG00000253461	1	-1	IGKV1-35	IG_V_pseudogene	284
chr2	87960000	92080000	chr2	89295233	89295455	ENSG00000253487	1	-1	IGKV2-36	IG_V_pseudogene	222
chr2	87960000	92080000	chr2	89309898	89310144	ENSG00000253592	1	-1	IGKV2-38	IG_V_pseudogene	246
chr2	87960000	92080000	chr2	89872463	89872702	ENSG00000254009	1	1	IGKV2D-38	IG_V_pseudogene	239
chr2	87960000	92080000	chr2	89887022	89887247	ENSG00000253127	1	1	IGKV2D-36	IG_V_pseudogene	225
chr2	87960000	92080000	chr2	89895502	89895772	ENSG00000232747	2	1	IGKV1D-35	IG_V_pseudogene	270
chr2	87960000	92080000	chr2	89906757	89907246	ENSG00000253501	1	1	IGKV3D-34	IG_V_pseudogene	489
chr2	87960000	92080000	chr2	89928422	89928867	ENSG00000253191	1	1	IGKV1D-32	IG_V_pseudogene	445
chr2	87960000	92080000	chr2	89929701	89930202	ENSG00000253999	1	1	IGKV3D-31	IG_V_pseudogene	501
chr2	87960000	92080000	chr2	89968867	89969335	ENSG00000224607	4	1	IGKV1D-27	IG_V_pseudogene	468
chr2	87960000	92080000	chr2	89989987	89990221	ENSG00000254097	1	1	IGKV3D-25	IG_V_pseudogene	234
chr2	87960000	92080000	chr2	90009402	90009927	ENSG00000254345	1	1	IGKV2D-23	IG_V_pseudogene	525
chr2	87960000	92080000	chr2	90010741	90011184	ENSG00000253365	1	1	IGKV1D-22	IG_V_pseudogene	443
chr2	87960000	92080000	chr2	90046796	90047057	ENSG00000253765	1	1	IGKV2D-19	IG_V_pseudogene	261
chr2	87960000	92080000	chr2	90052581	90053372	ENSG00000254220	1	1	IGKV2D-18	IG_V_pseudogene	791
chr2	87960000	92080000	chr2	90121786	90122564	ENSG00000254292	1	1	IGKV2D-14	IG_V_pseudogene	778
chr2	87960000	92080000	chr2	90179889	90180587	ENSG00000253906	1	1	IGKV2D-10	IG_V_pseudogene	698
chr2	87960000	92080000	chr2	90315366	90315836	ENSG00000270999	1	-1	IGKV1OR2-118	IG_V_pseudogene	470
chr2	87960000	92080000	chr2	91817771	91818248	ENSG00000235235	6	1	IGKV1OR2-1	IG_V_pseudogene	477
chr2	87960000	92080000	chr2	88931666	88932380	ENSG00000253435	1	-1	IGKV2-4	IG_V_pseudogene	714
chr2	87960000	92080000	chr2	89128724	89129483	ENSG00000254157	1	-1	IGKV2-18	IG_V_pseudogene	759
chr9	40840000	65600000	chr9	64765054	64765535	ENSG00000156755	10	-1	IGKV1OR-2	IG_V_pseudogene	481
chr9	40840000	65600000	chr9	65250543	65250826	ENSG00000204780	5	-1	IGKV1OR9-1	IG_V_pseudogene	283
chr22	21520000	23960000	chr22	22026076	22026593	ENSG00000253239	1	1	IGLVI-70	IG_V_pseudogene	517
chr22	21520000	23960000	chr22	22032745	22033194	ENSG00000254355	1	1	IGLVI-68	IG_V_pseudogene	449
chr22	21520000	23960000	chr22	22043618	22043942	ENSG00000253794	1	1	IGLV10-67	IG_V_pseudogene	324
chr22	21520000	23960000	chr22	22058433	22058892	ENSG00000253874	1	1	IGLVIV-66-1	IG_V_pseudogene	459
chr22	21520000	23960000	chr22	22061077	22061538	ENSG00000254075	1	1	IGLVV-66	IG_V_pseudogene	461
chr22	21520000	23960000	chr22	22070225	22070707	ENSG00000254161	1	1	IGLVIV-65	IG_V_pseudogene	482
chr22	21520000	23960000	chr22	22075366	22075666	ENSG00000253242	1	1	IGLVIV-64	IG_V_pseudogene	300
chr22	21520000	23960000	chr22	22079770	22080263	ENSG00000253752	1	1	IGLVI-63	IG_V_pseudogene	493
chr22	21520000	23960000	chr22	22086561	22087110	ENSG00000253823	1	1	IGLV1-62	IG_V_pseudogene	549
chr22	21520000	23960000	chr22	22179228	22179477	ENSG00000254308	1	1	IGLVIV-59	IG_V_pseudogene	249
chr22	21520000	23960000	chr22	22182582	22182885	ENSG00000253637	1	1	IGLVV-58	IG_V_pseudogene	303
chr22	21520000	23960000	chr22	22198560	22199011	ENSG00000253126	1	1	IGLVI-56	IG_V_pseudogene	451
chr22	21520000	23960000	chr22	22219647	22220133	ENSG00000253935	1	1	IGLVIV-53	IG_V_pseudogene	486
chr22	21520000	23960000	chr22	22397032	22397524	ENSG00000254175	1	1	IGLVI-42	IG_V_pseudogene	492
chr22	21520000	23960000	chr22	22398849	22398999	ENSG00000254073	1	1	IGLVVII-41-1	IG_V_pseudogene	150
chr22	21520000	23960000	chr22	22404207	22404721	ENSG00000253818	1	1	IGLV1-41	IG_V_pseudogene	514
chr22	21520000	23960000	chr22	22425821	22426314	ENSG00000253889	1	1	IGLVI-38	IG_V_pseudogene	493
chr22	21520000	23960000	chr22	22450202	22450652	ENSG00000253631	1	1	IGLV7-35	IG_V_pseudogene	450
chr22	21520000	23960000	chr22	22580014	22580296	ENSG00000253120	1	1	IGLV2-34	IG_V_pseudogene	282
chr22	21520000	23960000	chr22	22604445	22605165	ENSG00000253920	1	1	IGLV3-31	IG_V_pseudogene	720
chr22	21520000	23960000	chr22	22618572	22619163	ENSG00000253329	1	1	IGLV3-30	IG_V_pseudogene	591
chr22	21520000	23960000	chr22	22661299	22661542	ENSG00000253338	1	1	IGLV3-29	IG_V_pseudogene	243
chr22	21520000	23960000	chr22	22664473	22664907	ENSG00000253451	1	1	IGLV2-28	IG_V_pseudogene	434
chr22	21520000	23960000	chr22	22673152	22673602	ENSG00000253913	1	1	IGLV3-26	IG_V_pseudogene	450
chr22	21520000	23960000	chr22	22679097	22679345	ENSG00000253779	1	1	IGLVVI-25-1	IG_V_pseudogene	248
chr22	21520000	23960000	chr22	22694439	22694952	ENSG00000253822	1	1	IGLV3-24	IG_V_pseudogene	513
chr22	21520000	23960000	chr22	22700760	22700970	ENSG00000253546	1	1	IGLVVI-22-1	IG_V_pseudogene	210
chr22	21520000	23960000	chr22	22715290	22715419	ENSG00000254240	1	1	IGLVI-20	IG_V_pseudogene	129
chr22	21520000	23960000	chr22	22738944	22739187	ENSG00000253152	1	1	IGLV3-17	IG_V_pseudogene	243
chr22	21520000	23960000	chr22	22755554	22755797	ENSG00000253786	1	1	IGLV3-15	IG_V_pseudogene	243
chr22	21520000	23960000	chr22	22762294	22762516	ENSG00000253590	1	1	IGLV3-13	IG_V_pseudogene	222
chr22	21520000	23960000	chr22	22838602	22838872	ENSG00000254077	1	1	IGLV3-7	IG_V_pseudogene	270
chr22	21520000	23960000	chr22	22850375	22850624	ENSG00000253448	1	1	IGLV3-6	IG_V_pseudogene	249
chr22	21520000	23960000	chr22	22856762	22857038	ENSG00000253234	1	1	IGLV2-5	IG_V_pseudogene	276
chr22	21520000	23960000	chr22	22858025	22858268	ENSG00000226420	1	1	IGLV3-4	IG_V_pseudogene	243
chr22	21520000	23960000	chr22	22873212	22873440	ENSG00000253963	1	1	IGLV3-2	IG_V_pseudogene	228
chr1	760000	2080000	chr1	760911	761989	ENSG00000229905	1	1		lncRNA	1078
chr1	760000	2080000	chr1	824228	827539	ENSG00000225880	6	-1	LINC00115	lncRNA	3311
chr1	760000	2080000	chr1	860226	868202	ENSG00000288531	1	1		lncRNA	7976
chr1	760000	2080000	chr1	904834	915976	ENSG00000272438	1	1		lncRNA	11142
chr1	760000	2080000	chr1	911435	914948	ENSG00000230699	2	1		lncRNA	3513
chr1	760000	2080000	chr1	914171	914971	ENSG00000241180	1	1		lncRNA	800
chr1	760000	2080000	chr1	995966	998051	ENSG00000272512	1	-1		lncRNA	2085
chr1	760000	2080000	chr1	1011997	1013193	ENSG00000224969	1	-1		lncRNA	1196
chr1	760000	2080000	chr1	1055033	1056116	ENSG00000242590	1	1		lncRNA	1083
chr1	760000	2080000	chr1	1062208	1063288	ENSG00000273443	1	-1		lncRNA	1080
chr1	760000	2080000	chr1	1137017	1144056	ENSG00000223823	1	1	LINC01342	lncRNA	7039
chr1	760000	2080000	chr1	1169357	1170343	ENSG00000272141	1	1		lncRNA	986
chr1	760000	2080000	chr1	1173056	1179555	ENSG00000205231	1	-1	TTLL10-AS1	lncRNA	6499
chr1	760000	2080000	chr1	1249777	1251334	ENSG00000260179	1	-1		lncRNA	1557
chr1	760000	2080000	chr1	1317581	1318689	ENSG00000240731	1	-1		lncRNA	1108
chr1	760000	2080000	chr1	1399515	1402046	ENSG00000224870	9	1	MRPL20-AS1	lncRNA	2531
chr1	760000	2080000	chr1	1409096	1410618	ENSG00000272455	1	1	MRPL20-DT	lncRNA	1522
chr1	760000	2080000	chr1	1420245	1422691	ENSG00000225905	1	1	ANKRD65-AS1	lncRNA	2446
chr1	760000	2080000	chr1	1430539	1434573	ENSG00000225285	1	-1	LINC01770	lncRNA	4034
chr1	760000	2080000	chr1	1574102	1577075	ENSG00000215014	5	1		lncRNA	2973
chr1	760000	2080000	chr1	1600314	1602703	ENSG00000286989	1	1		lncRNA	2389
chr1	760000	2080000	chr1	1613758	1615795	ENSG00000272106	1	-1		lncRNA	2037
chr1	760000	2080000	chr1	1659325	1662602	ENSG00000272004	1	1		lncRNA	3277
chr1	760000	2080000	chr1	1891223	1892726	ENSG00000231050	3	1	GNB1-DT	lncRNA	1503
chr1	760000	2080000	chr1	2049203	2050070	ENSG00000226969	1	-1	PRKCZ-DT	lncRNA	867
chr1	760000	2080000	chr1	725885	778688	ENSG00000291215	1	-1		lncRNA	18688
chr1	760000	2080000	chr1	817371	819837	ENSG00000177757	2	1	FAM87B	lncRNA	2466
chr1	760000	2080000	chr1	868071	876903	ENSG00000230368	2	-1	FAM41C	lncRNA	8832
chr1	760000	2080000	chr1	825138	859446	ENSG00000228794	12	1	LINC01128	lncRNA	34308
chr1	760000	2080000	chr1	800879	817712	ENSG00000290784	1	-1		lncRNA	16833
chr1	760000	2080000	chr1	1097585	1104598	ENSG00000285812	1	1		lncRNA	7013
chr1	760000	2080000	chr1	1059687	1066459	ENSG00000291156	1	1		lncRNA	6772
chr1	760000	2080000	chr1	1275223	1280420	ENSG00000230415	1	1	LINC01786	lncRNA	5197
chr1	760000	2080000	chr1	1503250	1509466	ENSG00000290916	1	1		lncRNA	6216
chr1	760000	2080000	chr1	1724838	1745992	ENSG00000290854	1	-1		lncRNA	21154
chr1	760000	2080000	chr1	2013213	2015639	ENSG00000233542	2	-1		lncRNA	2426
chr1	760000	2080000	chr1	916865	921016	ENSG00000223764	2	-1	LINC02593	lncRNA	4151
chr1	760000	2080000	chr1	778747	810065	ENSG00000237491	10	1	LINC01409	lncRNA	31318
chr1	760000	2080000	chr1	1702736	1737688	ENSG00000268575	1	-1		lncRNA	34952
chr1	2160000	2680000	chr1	2181794	2184389	ENSG00000182873	5	-1	PRKCZ-AS1	lncRNA	2595
chr1	2160000	2680000	chr1	2212523	2220738	ENSG00000234396	3	1		lncRNA	8215
chr1	2160000	2680000	chr1	2315040	2323085	ENSG00000287356	1	1		lncRNA	8045
chr1	2160000	2680000	chr1	2363061	2363628	ENSG00000272420	1	-1		lncRNA	567
chr1	2160000	2680000	chr1	2492300	2493258	ENSG00000224387	1	-1		lncRNA	958
chr1	2160000	2680000	chr1	2493437	2494479	ENSG00000229393	1	-1		lncRNA	1042
chr1	2160000	2680000	chr1	2581560	2584533	ENSG00000228037	1	1		lncRNA	2973
chr1	2160000	2680000	chr1	2585610	2586060	ENSG00000289610	2	1		lncRNA	450
chr1	2160000	2680000	chr1	2632568	2636620	ENSG00000237058	1	1	MMEL1-AS1	lncRNA	4052
chr1	2160000	2680000	chr1	2326201	2326693	ENSG00000272161	1	-1		lncRNA	492
chr1	2160000	2680000	chr1	2530064	2547471	ENSG00000272449	3	1		lncRNA	17407
chr1	2160000	2680000	chr1	2549920	2557031	ENSG00000238164	6	-1	TNFRSF14-AS1	lncRNA	7111
chr1	6000000	7680000	chr1	6204840	6205780	ENSG00000226944	1	-1	RNF207-AS1	lncRNA	940
chr1	6000000	7680000	chr1	6234692	6239444	ENSG00000225077	3	1	ICMT-DT	lncRNA	4752
chr1	6000000	7680000	chr1	6393555	6394391	ENSG00000271746	1	1		lncRNA	836
chr1	6000000	7680000	chr1	6443034	6447006	ENSG00000231868	1	-1		lncRNA	3972
chr1	6000000	7680000	chr1	6724637	6730012	ENSG00000228750	7	1	LINC01672	lncRNA	5375
chr1	6000000	7680000	chr1	6767954	6770038	ENSG00000284744	1	1		lncRNA	2084
chr1	6000000	7680000	chr1	6783892	6784843	ENSG00000237436	1	-1	CAMTA1-DT	lncRNA	951
chr1	6000000	7680000	chr1	7368942	7370270	ENSG00000237402	1	1	CAMTA1-IT1	lncRNA	1328
chr1	6000000	7680000	chr1	7441096	7441554	ENSG00000225126	1	-1	CAMTA1-AS1	lncRNA	458
chr1	6000000	7680000	chr1	7008376	7014279	ENSG00000237365	1	-1	CAMTA1-AS3	lncRNA	5903
chr1	6000000	7680000	chr1	7382487	7389754	ENSG00000237728	2	-1	CAMTA1-AS2	lncRNA	7267
chr1	7760000	8880000	chr1	7776383	7776775	ENSG00000269925	1	1		lncRNA	392
chr1	7760000	8880000	chr1	7998187	7999934	ENSG00000284716	1	-1		lncRNA	1747
chr1	7760000	8880000	chr1	8218190	8220529	ENSG00000233645	1	-1		lncRNA	2339
chr1	7760000	8880000	chr1	8424645	8435013	ENSG00000232912	6	1	RERE-AS1	lncRNA	10368
chr1	7760000	8880000	chr1	8805860	8807051	ENSG00000228423	2	-1		lncRNA	1191
chr1	7760000	8880000	chr1	8878835	8879894	ENSG00000230679	1	1	ENO1-AS1	lncRNA	1059
chr1	7760000	8880000	chr1	7810242	7827342	ENSG00000236266	1	-1		lncRNA	17100
chr1	7760000	8880000	chr1	8026738	8122702	ENSG00000238290	1	1	ERRFI1-DT	lncRNA	95964
chr1	7760000	8880000	chr1	8191692	8194926	ENSG00000288816	1	1		lncRNA	3234
chr1	7760000	8880000	chr1	8201518	8215210	ENSG00000227634	3	1	LINC01714	lncRNA	13692
chr1	7760000	8880000	chr1	7991134	8005312	ENSG00000284747	1	1		lncRNA	14178
chr1	8880000	9600000	chr1	8970490	8971244	ENSG00000290109	1	-1		lncRNA	754
chr1	8880000	9600000	chr1	9162322	9162945	ENSG00000289914	1	-1		lncRNA	623
chr1	8880000	9600000	chr1	9421098	9422862	ENSG00000284652	1	-1		lncRNA	1764
chr1	8880000	9600000	chr1	9182004	9196284	ENSG00000234546	5	1	LNCTAM34A	lncRNA	14280
chr1	8880000	9600000	chr1	9501092	9503471	ENSG00000235263	1	-1		lncRNA	2379
chr1	8880000	9600000	chr1	9148011	9198906	ENSG00000228526	8	-1	MIR34AHG	lncRNA	50895
chr1	8880000	9600000	chr1	9425094	9440564	ENSG00000284693	2	-1	LINC02606	lncRNA	15470
chr1	11000000	12080000	chr1	11068471	11073097	ENSG00000226849	1	1		lncRNA	4626
chr1	11000000	12080000	chr1	11099430	11102105	ENSG00000230337	3	1	EXOSC10-AS1	lncRNA	2675
chr1	11000000	12080000	chr1	11143898	11149537	ENSG00000225602	5	1	MTOR-AS1	lncRNA	5639
chr1	11000000	12080000	chr1	11311734	11319093	ENSG00000284646	1	-1		lncRNA	7359
chr1	11000000	12080000	chr1	11609468	11613358	ENSG00000235643	2	1	LINC01647	lncRNA	3890
chr1	11000000	12080000	chr1	11777077	11779619	ENSG00000177553	6	-1	C1orf167-AS1	lncRNA	2542
chr1	11000000	12080000	chr1	11979533	11980127	ENSG00000287384	1	-1		lncRNA	594
chr1	11000000	12080000	chr1	11500803	11502016	ENSG00000285833	1	-1		lncRNA	1213
chr1	11000000	12080000	chr1	11623558	11643416	ENSG00000284708	1	1		lncRNA	19858
chr1	11000000	12080000	chr1	11907940	11914298	ENSG00000285646	2	1		lncRNA	6358
chr1	12080000	12880000	chr1	12525716	12530691	ENSG00000229484	3	1	LINC02766	lncRNA	4975
chr1	12080000	12880000	chr1	12618900	12619980	ENSG00000272482	2	-1		lncRNA	1080
chr1	12080000	12880000	chr1	12618389	12618987	ENSG00000288927	2	1		lncRNA	598
chr1	12080000	12880000	chr1	12822686	12823159	ENSG00000228338	1	-1	LINC01784	lncRNA	473
chr1	12080000	12880000	chr1	12088441	12092264	ENSG00000285604	1	-1		lncRNA	3823
chr1	13320000	15520000	chr1	13324039	13324518	ENSG00000228229	2	1		lncRNA	479
chr1	13320000	15520000	chr1	13513220	13516270	ENSG00000259961	1	1		lncRNA	3050
chr1	13320000	15520000	chr1	13657311	13659910	ENSG00000237445	2	-1		lncRNA	2599
chr1	13320000	15520000	chr1	13757778	13758465	ENSG00000289380	1	1		lncRNA	687
chr1	13320000	15520000	chr1	14774469	14777727	ENSG00000287756	1	-1		lncRNA	3258
chr1	13320000	15520000	chr1	15164344	15171317	ENSG00000204464	7	-1	TMEM51-AS2	lncRNA	6973
chr1	13320000	15520000	chr1	15402979	15409433	ENSG00000228140	2	-1	EFHD2-AS1	lncRNA	6454
chr1	13320000	15520000	chr1	15111815	15153618	ENSG00000175147	13	-1	TMEM51-AS1	lncRNA	41803
chr1	13320000	15520000	chr1	14338825	14419973	ENSG00000234593	3	-1	KAZN-AS1	lncRNA	81148
chr1	13320000	15520000	chr1	14221887	14304445	ENSG00000231606	2	-1		lncRNA	82558
chr1	13320000	15520000	chr1	15326680	15343876	ENSG00000233485	1	-1	FHAD1-AS1	lncRNA	17196
chr1	13320000	15520000	chr1	15334166	15335464	ENSG00000236045	1	-1		lncRNA	1298
chr1	15760000	16560000	chr1	16006160	16006671	ENSG00000233078	1	-1		lncRNA	511
chr1	15760000	16560000	chr1	16159266	16161883	ENSG00000224621	1	1		lncRNA	2617
chr1	15760000	16560000	chr1	16155176	16158148	ENSG00000227959	2	1	EPHA2-AS1	lncRNA	2972
chr1	15760000	16560000	chr1	16197854	16198357	ENSG00000234166	1	1	ARHGEF19-AS1	lncRNA	503
chr1	15760000	16560000	chr1	16215907	16217425	ENSG00000291077	1	-1		lncRNA	1518
chr1	15760000	16560000	chr1	16228674	16231335	ENSG00000288398	1	-1		lncRNA	2661
chr1	15760000	16560000	chr1	16520694	16521796	ENSG00000224174	2	1		lncRNA	1102
chr1	15760000	16560000	chr1	16533886	16535649	ENSG00000233421	5	-1	LINC01783	lncRNA	1763
chr1	15760000	16560000	chr1	15834474	15848147	ENSG00000179743	4	-1	SPEN-AS1	lncRNA	13673
chr1	15760000	16560000	chr1	16460948	16468481	ENSG00000226029	1	1	LINC01772	lncRNA	7533
chr1	15760000	16560000	chr1	16467436	16499257	ENSG00000290842	1	-1	CROCCP3	lncRNA	31821
chr1	15760000	16560000	chr1	16514645	16515754	ENSG00000261135	1	1		lncRNA	1109
chr1	15760000	16560000	chr1	16515034	16521788	ENSG00000285853	1	1		lncRNA	6754
chr1	16560000	18880000	chr1	16617391	16617729	ENSG00000271732	1	1		lncRNA	338
chr1	16560000	18880000	chr1	16687339	16692309	ENSG00000290849	1	-1		lncRNA	4970
chr1	16560000	18880000	chr1	16701546	16705594	ENSG00000279151	1	1		lncRNA	4048
chr1	16560000	18880000	chr1	16851257	16853129	ENSG00000223643	6	-1		lncRNA	1872
chr1	16560000	18880000	chr1	16887577	16889725	ENSG00000238142	4	-1		lncRNA	2148
chr1	16560000	18880000	chr1	16904339	16904776	ENSG00000272426	1	-1		lncRNA	437
chr1	16560000	18880000	chr1	16905199	16905396	ENSG00000290122	1	1		lncRNA	197
chr1	16560000	18880000	chr1	16976302	16977792	ENSG00000286898	1	1		lncRNA	1490
chr1	16560000	18880000	chr1	17189783	17197617	ENSG00000204362	6	1	LINC02783	lncRNA	7834
chr1	16560000	18880000	chr1	17193232	17201733	ENSG00000282843	1	-1		lncRNA	8501
chr1	16560000	18880000	chr1	17406760	17407382	ENSG00000227751	1	1	RCC2-AS1	lncRNA	622
chr1	16560000	18880000	chr1	17439186	17439328	ENSG00000290096	1	-1		lncRNA	142
chr1	16560000	18880000	chr1	18385829	18388514	ENSG00000225387	1	1		lncRNA	2685
chr1	16560000	18880000	chr1	16618253	16644686	ENSG00000291072	1	-1	CROCCP2	lncRNA	26433
chr1	16560000	18880000	chr1	16656879	16667524	ENSG00000282143	1	1		lncRNA	10645
chr1	16560000	18880000	chr1	16739938	16750589	ENSG00000282740	1	-1		lncRNA	10651
chr1	16560000	18880000	chr1	16740280	16750968	ENSG00000290850	1	1		lncRNA	10688
chr1	16560000	18880000	chr1	16754910	16770237	ENSG00000290851	1	-1		lncRNA	15327
chr1	16560000	18880000	chr1	16870945	16883659	ENSG00000228549	5	1		lncRNA	12714
chr1	16560000	18880000	chr1	16978926	17005091	ENSG00000226526	1	1		lncRNA	26165
chr1	16560000	18880000	chr1	17717625	17749978	ENSG00000236648	2	1	LINC02810	lncRNA	32353
chr1	16560000	18880000	chr1	18015712	18045612	ENSG00000284653	1	1		lncRNA	29900
chr1	16560000	18880000	chr1	18065657	18074412	ENSG00000261781	1	1	LINC01654	lncRNA	8755
chr1	16560000	18880000	chr1	18166929	18179346	ENSG00000230035	2	-1	IGSF21-AS1	lncRNA	12417
chr1	18880000	19280000	chr1	19072110	19075511	ENSG00000272084	1	-1		lncRNA	3401
chr1	18880000	19280000	chr1	19210348	19240709	ENSG00000230424	3	1	EMC1-AS1	lncRNA	30361
chr1	22960000	23760000	chr1	23167098	23167889	ENSG00000289014	1	-1		lncRNA	791
chr1	22960000	23760000	chr1	23378380	23379029	ENSG00000271420	1	-1		lncRNA	649
chr1	22960000	23760000	chr1	23368939	23371839	ENSG00000249087	9	1	ZNF436-AS1	lncRNA	2900
chr1	22960000	23760000	chr1	23549139	23550915	ENSG00000235052	1	-1		lncRNA	1776
chr1	22960000	23760000	chr1	23281307	23287488	ENSG00000261326	4	-1	LINC01355	lncRNA	6181
chr1	22960000	23760000	chr1	23297797	23302866	ENSG00000284726	1	1		lncRNA	5069
chr1	22960000	23760000	chr1	23576436	23593621	ENSG00000285802	1	-1		lncRNA	17185
chr1	22960000	23760000	chr1	23581495	23640568	ENSG00000197880	10	1	MDS2	lncRNA	59073
chr1	22960000	23760000	chr1	23706901	23778325	ENSG00000236810	8	-1	ELOA-AS1	lncRNA	53099
chr1	22960000	23760000	chr1	23020147	23088058	ENSG00000240553	1	-1		lncRNA	67911
chr1	26480000	26920000	chr1	26620707	26620910	ENSG00000289452	1	-1		lncRNA	203
chr1	26480000	26920000	chr1	26692132	26694131	ENSG00000260063	1	-1		lncRNA	1999
chr1	26480000	26920000	chr1	26692586	26693046	ENSG00000290006	1	1		lncRNA	460
chr1	26480000	26920000	chr1	26876133	26878245	ENSG00000226698	1	1		lncRNA	2112
chr1	26480000	26920000	chr1	26881109	26882235	ENSG00000289554	1	-1		lncRNA	1126
chr1	26920000	27680000	chr1	27457198	27459582	ENSG00000241169	1	1		lncRNA	2384
chr1	26920000	27680000	chr1	27525805	27530561	ENSG00000237429	1	1		lncRNA	4756
chr1	26920000	27680000	chr1	27660328	27666279	ENSG00000233975	2	-1	LINC02574	lncRNA	5951
chr1	26920000	27680000	chr1	27229106	27234352	ENSG00000224311	1	-1	WDTC1-DT	lncRNA	5246
chr1	26920000	27680000	chr1	27669468	27703063	ENSG00000225886	3	1		lncRNA	10532
chr1	31160000	32360000	chr1	31644694	31649371	ENSG00000264078	1	1		lncRNA	4677
chr1	31160000	32360000	chr1	31789130	31791322	ENSG00000254545	1	1		lncRNA	2192
chr1	31160000	32360000	chr1	31933020	31933975	ENSG00000228634	1	1		lncRNA	955
chr1	31160000	32360000	chr1	32170733	32176568	ENSG00000250135	1	1		lncRNA	5835
chr1	31160000	32360000	chr1	32204769	32206814	ENSG00000224066	1	-1		lncRNA	2045
chr1	31160000	32360000	chr1	32240526	32241904	ENSG00000290045	1	1		lncRNA	1378
chr1	31160000	32360000	chr1	32231656	32241710	ENSG00000291132	1	-1		lncRNA	10054
chr1	31160000	32360000	chr1	32349194	32350663	ENSG00000233775	1	-1		lncRNA	1469
chr1	31160000	32360000	chr1	31333067	31346799	ENSG00000229044	1	-1		lncRNA	13732
chr1	31160000	32360000	chr1	31506226	31583306	ENSG00000284543	1	1	LINC01226	lncRNA	77080
chr1	31160000	32360000	chr1	31571585	31577898	ENSG00000229167	2	-1		lncRNA	6313
chr1	31160000	32360000	chr1	31644049	31660162	ENSG00000235790	7	1	PEF1-AS1	lncRNA	16113
chr1	31160000	32360000	chr1	31851913	31921841	ENSG00000269967	1	-1		lncRNA	69928
chr1	31160000	32360000	chr1	32052291	32073474	ENSG00000203325	3	-1		lncRNA	21183
chr1	31160000	32360000	chr1	31842019	31855568	ENSG00000203620	2	-1		lncRNA	13549
chr1	31160000	32360000	chr1	31972189	31987034	ENSG00000284702	1	-1		lncRNA	14845
chr1	32400000	32840000	chr1	32717734	32725237	ENSG00000224409	1	-1		lncRNA	7503
chr1	33120000	34760000	chr1	33194788	33200353	ENSG00000284721	1	1		lncRNA	5565
chr1	33120000	34760000	chr1	33261212	33261680	ENSG00000270115	1	1		lncRNA	468
chr1	33120000	34760000	chr1	33307348	33349245	ENSG00000225313	5	1		lncRNA	41897
chr1	33120000	34760000	chr1	33350352	33363245	ENSG00000233246	1	1	PHC2-AS1	lncRNA	12893
chr1	33120000	34760000	chr1	33868953	33893726	ENSG00000231163	6	1	CSMD2-AS1	lncRNA	24773
chr1	33120000	34760000	chr1	34640157	34685732	ENSG00000287703	1	-1		lncRNA	45575
chr1	39080000	39760000	chr1	39226670	39238620	ENSG00000287422	1	-1		lncRNA	11950
chr1	39080000	39760000	chr1	39633416	39633903	ENSG00000225903	1	1		lncRNA	487
chr1	39080000	39760000	chr1	39249838	39257649	ENSG00000226438	1	-1		lncRNA	7811
chr1	39080000	39760000	chr1	39565052	39573860	ENSG00000228060	3	1	PABPC4-AS1	lncRNA	8808
chr1	39080000	39760000	chr1	39522280	39559698	ENSG00000291129	1	-1	PPIEL	lncRNA	37418
chr1	40560000	41000000	chr1	40690380	40692074	ENSG00000272145	2	-1	NFYC-AS1	lncRNA	1694
chr1	40560000	41000000	chr1	40863914	40876670	ENSG00000229528	1	1		lncRNA	12756
chr1	40560000	41000000	chr1	40559666	40584335	ENSG00000286838	1	-1		lncRNA	24335
chr1	40560000	41000000	chr1	40659848	40667480	ENSG00000287743	1	1		lncRNA	7632
chr1	40560000	41000000	chr1	40669089	40687588	ENSG00000237899	1	-1		lncRNA	18499
chr1	40560000	41000000	chr1	40939294	40945524	ENSG00000286668	1	1		lncRNA	6230
chr1	42760000	43120000	chr1	42775813	42776790	ENSG00000228452	1	-1	C1orf50-AS1	lncRNA	977
chr1	42760000	43120000	chr1	42924460	42925849	ENSG00000288955	1	1		lncRNA	1389
chr1	42760000	43120000	chr1	42959065	42961864	ENSG00000283973	2	-1		lncRNA	2799
chr1	42760000	43120000	chr1	42832522	42846427	ENSG00000228192	10	-1	ZNF691-DT	lncRNA	13905
chr1	42760000	43120000	chr1	42959049	42996814	ENSG00000227533	7	1	SLC2A1-DT	lncRNA	37765
chr1	65040000	65720000	chr1	65067808	65069453	ENSG00000288804	1	1		lncRNA	1645
chr1	65040000	65720000	chr1	65310302	65318877	ENSG00000290094	1	1		lncRNA	8575
chr1	65040000	65720000	chr1	65703962	65714847	ENSG00000285079	1	1		lncRNA	10885
chr1	65040000	65720000	chr1	65279456	65306521	ENSG00000229294	1	-1		lncRNA	27065
chr1	65040000	65720000	chr1	65486406	65494188	ENSG00000237852	1	1		lncRNA	7782
chr1	66240000	67520000	chr1	66826942	66828558	ENSG00000231080	1	1		lncRNA	1616
chr1	66240000	67520000	chr1	66925327	66926027	ENSG00000289394	1	1		lncRNA	700
chr1	66240000	67520000	chr1	67121605	67123956	ENSG00000275678	1	-1		lncRNA	2351
chr1	66240000	67520000	chr1	66665864	66677027	ENSG00000248458	2	-1		lncRNA	11163
chr1	67520000	68440000	chr1	67522299	67532612	ENSG00000235200	5	1	LINC01702	lncRNA	10313
chr1	67520000	68440000	chr1	67832293	68202987	ENSG00000232284	9	1	GNG12-AS1	lncRNA	370694
chr1	68480000	69800000	chr1	68479129	68483539	ENSG00000233589	1	1		lncRNA	3539
chr1	68480000	69800000	chr1	68633701	68640425	ENSG00000285041	1	1		lncRNA	6724
chr1	68480000	69800000	chr1	69551848	69563715	ENSG00000287453	1	1		lncRNA	11867
chr1	68480000	69800000	chr1	69706950	69710274	ENSG00000287283	1	-1		lncRNA	3324
chr1	68480000	69800000	chr1	68496676	68538627	ENSG00000234264	1	1	DEPDC1-AS1	lncRNA	41951
chr1	68480000	69800000	chr1	68974010	69023558	ENSG00000285473	1	1		lncRNA	49548
chr1	68480000	69800000	chr1	69215835	69249477	ENSG00000235446	2	-1	LINC02791	lncRNA	33642
chr1	68480000	69800000	chr1	69433255	69435409	ENSG00000229639	1	1	LINC01758	lncRNA	2154
chr1	68480000	69800000	chr1	68679202	68943452	ENSG00000285407	1	1		lncRNA	264250
chr1	68480000	69800000	chr1	69055838	69229607	ENSG00000223883	2	1	LINC01707	lncRNA	173769
chr1	83880000	85280000	chr1	83979118	83984300	ENSG00000233061	1	-1	TTLL7-IT1	lncRNA	5182
chr1	83880000	85280000	chr1	84076331	84077961	ENSG00000271576	2	-1	PRKACB-DT	lncRNA	1630
chr1	83880000	85280000	chr1	84477039	84479157	ENSG00000285361	1	1		lncRNA	2118
chr1	83880000	85280000	chr1	84607099	84610697	ENSG00000285374	1	1		lncRNA	3598
chr1	83880000	85280000	chr1	84614068	84621061	ENSG00000289881	1	-1		lncRNA	6993
chr1	83880000	85280000	chr1	84628230	84635020	ENSG00000180869	4	-1	LINC01555	lncRNA	6790
chr1	83880000	85280000	chr1	84785427	84786714	ENSG00000285325	1	1		lncRNA	1287
chr1	83880000	85280000	chr1	84038529	84065031	ENSG00000285201	1	1		lncRNA	26502
chr1	83880000	85280000	chr1	84574114	84583620	ENSG00000284882	2	1		lncRNA	9506
chr1	83880000	85280000	chr1	84498350	84556688	ENSG00000285851	1	-1		lncRNA	58338
chr1	83880000	85280000	chr1	85276388	85448124	ENSG00000223653	6	1	BCL10-AS1	lncRNA	3612
chr1	92840000	93880000	chr1	92961858	92962441	ENSG00000289544	1	1		lncRNA	583
chr1	92840000	93880000	chr1	92978265	92987367	ENSG00000287797	1	1		lncRNA	9102
chr1	92840000	93880000	chr1	93591966	93610605	ENSG00000224093	7	1	BCAR3-AS1	lncRNA	18639
chr1	92840000	93880000	chr1	93847174	93848939	ENSG00000260464	1	1		lncRNA	1765
chr1	92840000	93880000	chr1	93262186	93346025	ENSG00000223745	8	-1	CCDC18-AS1	lncRNA	83839
chr1	93920000	94480000	chr1	94145111	94145619	ENSG00000233482	1	1		lncRNA	508
chr1	93920000	94480000	chr1	94417743	94418228	ENSG00000286692	1	-1		lncRNA	485
chr1	93920000	94480000	chr1	94318479	94324569	ENSG00000236098	1	-1		lncRNA	6090
chr1	93920000	94480000	chr1	94247819	94411036	ENSG00000226835	4	1	ARHGAP29-AS1	lncRNA	163217
chr1	112360000	113080000	chr1	112517799	112518441	ENSG00000273483	1	-1		lncRNA	642
chr1	112360000	113080000	chr1	112693688	112696621	ENSG00000225075	1	-1		lncRNA	2933
chr1	112360000	113080000	chr1	112715672	112717796	ENSG00000261595	1	1	PPM1J-DT	lncRNA	2124
chr1	112360000	113080000	chr1	112820170	112850643	ENSG00000215866	9	-1	LINC01356	lncRNA	30473
chr1	112360000	113080000	chr1	113011687	113073113	ENSG00000238198	2	-1	LRIG2-DT	lncRNA	61426
chr1	112360000	113080000	chr1	112978610	112999636	ENSG00000287807	1	-1		lncRNA	21026
chr1	112360000	113080000	chr1	112849821	112877878	ENSG00000224167	3	1	LINC01357	lncRNA	28057
chr1	112360000	113080000	chr1	112956415	113047055	ENSG00000226419	8	1	SLC16A1-AS1	lncRNA	90640
chr1	112360000	113080000	chr1	112176836	112360625	ENSG00000231246	3	-1	LINC02884	lncRNA	625
chr1	116120000	116560000	chr1	116164209	116167494	ENSG00000235933	2	1	LINC01779	lncRNA	3285
chr1	116120000	116560000	chr1	116429049	116433368	ENSG00000230381	2	-1		lncRNA	4319
chr1	116120000	116560000	chr1	116493016	116499212	ENSG00000224950	2	-1		lncRNA	6196
chr1	116120000	116560000	chr1	116493350	116502634	ENSG00000286276	1	1		lncRNA	9284
chr1	116120000	116560000	chr1	116289237	116297621	ENSG00000287217	1	-1		lncRNA	8384
chr1	116120000	116560000	chr1	116423724	116478842	ENSG00000233154	6	-1	LINC01762	lncRNA	55118
chr1	116120000	116560000	chr1	116378437	116421301	ENSG00000203865	13	-1	ATP1A1-AS1	lncRNA	42864
chr1	145400000	146080000	chr1	145475606	145480999	ENSG00000287374	1	1		lncRNA	5393
chr1	145400000	146080000	chr1	145892847	145893483	ENSG00000244619	2	1		lncRNA	636
chr1	145400000	146080000	chr1	145961388	145964422	ENSG00000278431	1	1		lncRNA	3034
chr1	145400000	146080000	chr1	146050441	146052244	ENSG00000287190	1	-1		lncRNA	1803
chr1	145400000	146080000	chr1	146052566	146061952	ENSG00000233396	9	1	LINC01719	lncRNA	9386
chr1	145400000	146080000	chr1	145572345	145607858	ENSG00000291005	1	-1	NBPF25P	lncRNA	35513
chr1	145400000	146080000	chr1	145926590	145959179	ENSG00000234222	6	1	LIX1L-AS1	lncRNA	32589
chr1	151280000	152040000	chr1	151279678	151282000	ENSG00000232671	8	-1	ZNF687-AS1	lncRNA	2000
chr1	151280000	152040000	chr1	151327949	151328429	ENSG00000273481	1	1		lncRNA	480
chr1	151280000	152040000	chr1	151340648	151341966	ENSG00000224645	1	1		lncRNA	1318
chr1	151280000	152040000	chr1	151346938	151348027	ENSG00000237976	2	1	RFX5-AS1	lncRNA	1089
chr1	151280000	152040000	chr1	151612038	151613363	ENSG00000250734	2	-1		lncRNA	1325
chr1	151280000	152040000	chr1	151701026	151708386	ENSG00000227045	1	1		lncRNA	7360
chr1	151280000	152040000	chr1	151755541	151759911	ENSG00000269621	1	1		lncRNA	4370
chr1	151280000	152040000	chr1	151765709	151766389	ENSG00000232937	1	1		lncRNA	680
chr1	151280000	152040000	chr1	151766486	151767000	ENSG00000268288	1	-1		lncRNA	514
chr1	151280000	152040000	chr1	151790804	151794403	ENSG00000203288	6	1	TDRKH-AS1	lncRNA	3599
chr1	151280000	152040000	chr1	151798054	151798602	ENSG00000269489	1	1		lncRNA	548
chr1	151280000	152040000	chr1	151540516	151561855	ENSG00000232536	1	1		lncRNA	21339
chr1	151280000	152040000	chr1	151763384	151769501	ENSG00000249602	1	-1		lncRNA	6117
chr1	151280000	152040000	chr1	151841877	151850385	ENSG00000234614	1	1	C2CD4D-AS1	lncRNA	8508
chr1	151280000	152040000	chr1	151885251	151899333	ENSG00000285651	1	1		lncRNA	14082
chr1	151280000	152040000	chr1	151994531	152042774	ENSG00000229021	2	1		lncRNA	45469
chr1	151280000	152040000	chr1	151944890	151953985	ENSG00000286581	1	1		lncRNA	9095
chr1	152040000	152480000	chr1	152122534	152125065	ENSG00000226716	1	1		lncRNA	2531
chr1	152040000	152480000	chr1	152205858	152207057	ENSG00000236427	1	1	CCDST	lncRNA	1199
chr1	152040000	152480000	chr1	151994531	152042774	ENSG00000229021	2	1		lncRNA	2774
chr1	152040000	152480000	chr1	152168125	152445456	ENSG00000237975	7	1	FLG-AS1	lncRNA	277331
chr1	153480000	154000000	chr1	153750983	153752176	ENSG00000233222	2	-1		lncRNA	1193
chr1	153480000	154000000	chr1	153793937	153796302	ENSG00000291199	1	1		lncRNA	2365
chr1	153480000	154000000	chr1	153945551	153946000	ENSG00000289935	1	-1		lncRNA	449
chr1	153480000	154000000	chr1	153964361	153965070	ENSG00000282386	1	1		lncRNA	709
chr1	153480000	154000000	chr1	153966516	153966930	ENSG00000273026	1	1		lncRNA	414
chr1	153480000	154000000	chr1	153977727	153979160	ENSG00000272654	2	1	JTB-DT	lncRNA	1433
chr1	153480000	154000000	chr1	153586813	153606283	ENSG00000285867	1	-1		lncRNA	19470
chr1	153480000	154000000	chr1	153533430	153535129	ENSG00000238279	3	1		lncRNA	1699
chr1	153480000	154000000	chr1	153626332	153634340	ENSG00000271853	5	-1		lncRNA	8008
chr1	153480000	154000000	chr1	153631438	153634397	ENSG00000272030	1	-1		lncRNA	2959
chr1	153480000	154000000	chr1	153923284	153935245	ENSG00000284738	2	1		lncRNA	11961
chr1	153480000	154000000	chr1	153746851	153751227	ENSG00000243613	1	-1		lncRNA	4376
chr1	155200000	156600000	chr1	155194996	155205495	ENSG00000231064	9	1	THBS3-AS1	lncRNA	5495
chr1	155200000	156600000	chr1	155211151	155213819	ENSG00000236263	1	-1		lncRNA	2668
chr1	155200000	156600000	chr1	155396010	155396978	ENSG00000227773	1	-1	ASH1L-IT1	lncRNA	968
chr1	155200000	156600000	chr1	155562026	155563944	ENSG00000235919	5	1	ASH1L-AS1	lncRNA	1918
chr1	155200000	156600000	chr1	155609776	155610380	ENSG00000232519	2	-1		lncRNA	604
chr1	155200000	156600000	chr1	155710098	155710563	ENSG00000227673	1	-1		lncRNA	465
chr1	155200000	156600000	chr1	155978799	155982986	ENSG00000273002	1	1	ARHGEF2-AS2	lncRNA	4187
chr1	155200000	156600000	chr1	156388226	156395609	ENSG00000237390	1	1		lncRNA	7383
chr1	155200000	156600000	chr1	156509854	156511681	ENSG00000260460	1	1		lncRNA	1827
chr1	155200000	156600000	chr1	156503083	156504021	ENSG00000288835	1	1		lncRNA	938
chr1	155200000	156600000	chr1	156504660	156505091	ENSG00000289593	2	-1		lncRNA	431
chr1	155200000	156600000	chr1	155213821	155227574	ENSG00000291137	1	-1	GBAP1	lncRNA	13753
chr1	155200000	156600000	chr1	155626755	155637604	ENSG00000287839	2	-1		lncRNA	10849
chr1	155200000	156600000	chr1	155991390	156001787	ENSG00000224276	1	1	ARHGEF2-AS1	lncRNA	10397
chr1	155200000	156600000	chr1	156001953	156033342	ENSG00000285677	2	1		lncRNA	31389
chr1	155200000	156600000	chr1	156404250	156456763	ENSG00000125462	20	-1	MIR9-1HG	lncRNA	52513
chr1	155200000	156600000	chr1	155316863	155324176	ENSG00000225855	7	-1	RUSC1-AS1	lncRNA	7313
chr1	156640000	156960000	chr1	156637783	156641004	ENSG00000272068	1	-1	BCAN-AS1	lncRNA	1004
chr1	156640000	156960000	chr1	156641666	156644887	ENSG00000272405	1	-1		lncRNA	3221
chr1	156640000	156960000	chr1	156687695	156691997	ENSG00000237588	2	-1		lncRNA	4302
chr1	156640000	156960000	chr1	156768105	156769233	ENSG00000287624	1	-1		lncRNA	1128
chr1	156640000	156960000	chr1	156646507	156661424	ENSG00000229953	1	-1	BCAN-AS2	lncRNA	14917
chr1	156640000	156960000	chr1	156689676	156704757	ENSG00000285570	1	1		lncRNA	15081
chr1	156640000	156960000	chr1	156712212	156713174	ENSG00000223356	1	-1		lncRNA	962
chr1	161160000	161440000	chr1	161165695	161166271	ENSG00000290115	1	-1		lncRNA	576
chr1	161160000	161440000	chr1	161364221	161364751	ENSG00000289106	2	1		lncRNA	530
chr1	161160000	161440000	chr1	161368022	161371964	ENSG00000288670	1	1		lncRNA	3942
chr1	161160000	161440000	chr1	161389547	161389965	ENSG00000289141	2	-1		lncRNA	418
chr1	161160000	161440000	chr1	161399998	161401868	ENSG00000288093	1	1		lncRNA	1870
chr1	161160000	161440000	chr1	161433444	161440996	ENSG00000283317	1	-1		lncRNA	6556
chr1	161160000	161440000	chr1	161403409	161470523	ENSG00000283360	1	-1		lncRNA	36591
chr1	161160000	161440000	chr1	161399409	161422424	ENSG00000283696	1	1		lncRNA	23015
chr1	168200000	169440000	chr1	168401483	168407274	ENSG00000283255	1	-1		lncRNA	5791
chr1	168200000	169440000	chr1	169059576	169062441	ENSG00000287282	1	1		lncRNA	2865
chr1	168200000	169440000	chr1	169104124	169104907	ENSG00000237707	1	1		lncRNA	783
chr1	168200000	169440000	chr1	168763365	168774490	ENSG00000235736	1	-1		lncRNA	11125
chr1	168200000	169440000	chr1	168784012	168792886	ENSG00000225826	2	1	LINC00626	lncRNA	8874
chr1	168200000	169440000	chr1	168898633	168902836	ENSG00000287831	1	1		lncRNA	4203
chr1	168200000	169440000	chr1	169310665	169322479	ENSG00000235575	1	1		lncRNA	11814
chr1	168200000	169440000	chr1	168400829	168495692	ENSG00000228697	6	-1		lncRNA	94863
chr1	168200000	169440000	chr1	168903905	169087005	ENSG00000203601	3	-1	LINC00970	lncRNA	183100
chr1	168200000	169440000	chr1	168695874	169103296	ENSG00000285622	2	-1		lncRNA	407422
chr1	172440000	173240000	chr1	172906900	172907684	ENSG00000224000	1	1		lncRNA	784
chr1	172440000	173240000	chr1	173174300	173175503	ENSG00000226375	1	-1		lncRNA	1203
chr1	172440000	173240000	chr1	172775905	173064015	ENSG00000224228	2	1		lncRNA	288110
chr1	199640000	200560000	chr1	200315435	200315967	ENSG00000273093	1	-1		lncRNA	532
chr1	199640000	200560000	chr1	200478020	200483604	ENSG00000282849	1	-1		lncRNA	5584
chr1	199640000	200560000	chr1	199932233	199940045	ENSG00000290125	1	1		lncRNA	7812
chr1	199640000	200560000	chr1	200333193	200478669	ENSG00000230623	8	1		lncRNA	145476
chr1	199640000	200560000	chr1	200253419	200400705	ENSG00000203721	8	-1	LINC00862	lncRNA	147286
chr1	201440000	202160000	chr1	201464383	201465146	ENSG00000224818	1	-1		lncRNA	763
chr1	201440000	202160000	chr1	201673105	201674144	ENSG00000236390	1	-1		lncRNA	1039
chr1	201440000	202160000	chr1	201893842	201899978	ENSG00000223774	5	1		lncRNA	6136
chr1	201440000	202160000	chr1	201507241	201534784	ENSG00000224536	2	1	CSRP1-AS1	lncRNA	27543
chr1	201440000	202160000	chr1	201723294	201737506	ENSG00000235121	1	-1		lncRNA	14212
chr1	201440000	202160000	chr1	202011370	202015657	ENSG00000249007	1	1		lncRNA	4287
chr1	201440000	202160000	chr1	201995696	202010463	ENSG00000234678	2	-1	ELF3-AS1	lncRNA	14767
chr1	201440000	202160000	chr1	201688259	201829559	ENSG00000231871	5	-1	IPO9-AS1	lncRNA	141300
chr1	204520000	206160000	chr1	204626775	204629712	ENSG00000240219	1	1		lncRNA	2937
chr1	204520000	206160000	chr1	204663872	204664613	ENSG00000228153	1	1		lncRNA	741
chr1	204520000	206160000	chr1	204822664	204829274	ENSG00000287197	1	-1		lncRNA	6610
chr1	204520000	206160000	chr1	205233821	205236867	ENSG00000225063	1	-1	TMCC2-AS1	lncRNA	3046
chr1	204520000	206160000	chr1	205455929	205469024	ENSG00000224717	1	1	LEMD1-DT	lncRNA	13095
chr1	204520000	206160000	chr1	205935128	205935768	ENSG00000227687	1	1		lncRNA	640
chr1	204520000	206160000	chr1	206117783	206126805	ENSG00000226780	1	1	AVPR1B-DT	lncRNA	9022
chr1	204520000	206160000	chr1	205373252	205387440	ENSG00000226235	1	1	LEMD1-AS1	lncRNA	14188
chr1	204520000	206160000	chr1	205813322	205896082	ENSG00000286619	1	1		lncRNA	82760
chr1	204520000	206160000	chr1	206147164	206166149	ENSG00000287432	1	1		lncRNA	12836
chr1	204520000	206160000	chr1	204603035	204616565	ENSG00000240710	1	1		lncRNA	13530
chr1	204520000	206160000	chr1	205775559	205783623	ENSG00000285521	1	1		lncRNA	8064
chr1	213080000	214200000	chr1	213983793	213986419	ENSG00000274895	1	-1		lncRNA	2626
chr1	213080000	214200000	chr1	214028891	214030901	ENSG00000272167	2	-1		lncRNA	2010
chr1	213080000	214200000	chr1	213924749	213926654	ENSG00000281664	1	-1	LINC00538	lncRNA	1905
chr1	213080000	214200000	chr1	213492288	213579267	ENSG00000225233	2	1		lncRNA	86979
chr1	213080000	214200000	chr1	213731416	213794587	ENSG00000228255	1	1		lncRNA	63171
chr1	213080000	214200000	chr1	214051194	214187773	ENSG00000283518	1	-1	LINC02775	lncRNA	136579
chr1	213080000	214200000	chr1	213817751	213988508	ENSG00000230461	10	-1	PROX1-AS1	lncRNA	170757
chr1	214200000	214640000	chr1	214344172	214357615	ENSG00000228470	1	-1		lncRNA	13443
chr1	228640000	229240000	chr1	229022773	229038274	ENSG00000282111	1	-1	LINC02815	lncRNA	15501
chr1	228640000	229240000	chr1	229223457	229242902	ENSG00000233920	2	-1		lncRNA	16543
chr1	228640000	229240000	chr1	229087114	229205428	ENSG00000236975	2	-1	LINC02814	lncRNA	118314
chr1	234440000	235120000	chr1	234531338	234532014	ENSG00000288760	1	1		lncRNA	676
chr1	234440000	235120000	chr1	234527887	234531803	ENSG00000231768	2	-1	LINC01354	lncRNA	3916
chr1	234440000	235120000	chr1	234599568	234600057	ENSG00000289057	1	-1		lncRNA	489
chr1	234440000	235120000	chr1	234607008	234609483	ENSG00000228830	1	1		lncRNA	2475
chr1	234440000	235120000	chr1	234629311	234634780	ENSG00000224939	1	1	LINC00184	lncRNA	5469
chr1	234440000	235120000	chr1	234644666	234647571	ENSG00000272362	1	1		lncRNA	2905
chr1	234440000	235120000	chr1	234660271	234667104	ENSG00000241475	1	1		lncRNA	6833
chr1	234440000	235120000	chr1	234757619	234760056	ENSG00000279261	2	-1	LINC02961	lncRNA	2437
chr1	234440000	235120000	chr1	234771523	234772799	ENSG00000289377	2	-1		lncRNA	1276
chr1	234440000	235120000	chr1	234957231	234960022	ENSG00000237520	2	1	LINC02971	lncRNA	2791
chr1	234440000	235120000	chr1	235064927	235074220	ENSG00000280587	3	-1	LINC01348	lncRNA	9293
chr1	234440000	235120000	chr1	235104180	235104609	ENSG00000273416	1	-1		lncRNA	429
chr1	234440000	235120000	chr1	234535963	234539054	ENSG00000286210	1	-1		lncRNA	3091
chr1	234440000	235120000	chr1	234550542	234554838	ENSG00000287633	1	1		lncRNA	4296
chr1	234440000	235120000	chr1	234565298	234570088	ENSG00000230404	1	1		lncRNA	4790
chr1	234440000	235120000	chr1	234724042	234736720	ENSG00000227630	4	1	LINC01132	lncRNA	12678
chr1	234440000	235120000	chr1	234646289	234683176	ENSG00000228044	3	1		lncRNA	36887
chr1	234440000	235120000	chr1	234709383	234720220	ENSG00000282097	1	1		lncRNA	10837
chr1	234440000	235120000	chr1	234669523	234696153	ENSG00000230628	1	-1		lncRNA	26630
chr1	234440000	235120000	chr1	234978814	234980804	ENSG00000258082	2	-1		lncRNA	1990
chr1	234440000	235120000	chr1	234957342	234970062	ENSG00000238005	5	-1	LNCATV	lncRNA	12720
chr1	234440000	235120000	chr1	234811052	234932653	ENSG00000286263	1	-1		lncRNA	121601
chr1	235480000	236040000	chr1	235839483	235840182	ENSG00000229463	2	1	LYST-AS1	lncRNA	699
chr1	235480000	236040000	chr1	235942553	235943805	ENSG00000237845	1	-1	LINC03081	lncRNA	1252
chr1	235480000	236040000	chr1	235957879	235971825	ENSG00000229291	1	-1	LINC02768	lncRNA	13946
chr2	6840000	8800000	chr2	6905724	6906301	ENSG00000271947	1	-1		lncRNA	577
chr2	6840000	8800000	chr2	7260871	7261504	ENSG00000272002	1	1	LINC02973	lncRNA	633
chr2	6840000	8800000	chr2	7671604	7672246	ENSG00000230515	1	-1		lncRNA	642
chr2	6840000	8800000	chr2	7671330	7675736	ENSG00000287119	1	1		lncRNA	4406
chr2	6840000	8800000	chr2	7725682	7732268	ENSG00000235576	3	1	LINC01871	lncRNA	6586
chr2	6840000	8800000	chr2	7748569	7749277	ENSG00000290050	1	-1		lncRNA	708
chr2	6840000	8800000	chr2	8281464	8282581	ENSG00000289191	2	-1		lncRNA	1117
chr2	6840000	8800000	chr2	6819463	6840464	ENSG00000225964	6	-1	NRIR	lncRNA	464
chr2	6840000	8800000	chr2	6911754	6918734	ENSG00000228203	8	-1	GRASLND	lncRNA	6980
chr2	6840000	8800000	chr2	7383227	7450544	ENSG00000229727	7	1		lncRNA	67317
chr2	6840000	8800000	chr2	7886767	7899725	ENSG00000226506	6	-1		lncRNA	12958
chr2	6840000	8800000	chr2	7937282	7953402	ENSG00000286857	1	1		lncRNA	16120
chr2	6840000	8800000	chr2	7876670	7891784	ENSG00000290092	1	1		lncRNA	15114
chr2	6840000	8800000	chr2	8139335	8144950	ENSG00000229740	3	1		lncRNA	5615
chr2	6840000	8800000	chr2	8488420	8505027	ENSG00000285591	1	1		lncRNA	16607
chr2	6840000	8800000	chr2	8600892	8622942	ENSG00000231083	1	-1		lncRNA	22050
chr2	6840000	8800000	chr2	8666636	8681864	ENSG00000235092	7	-1	ID2-AS1	lncRNA	15228
chr2	6840000	8800000	chr2	7045329	7077916	ENSG00000223884	7	-1		lncRNA	32587
chr2	6840000	8800000	chr2	7922425	8278186	ENSG00000235665	6	-1	LINC00298	lncRNA	355761
chr2	6840000	8800000	chr2	8461703	8592903	ENSG00000236008	5	-1	LINC01814	lncRNA	131200
chr2	6840000	8800000	chr2	7988683	8488284	ENSG00000236790	7	-1	LINC00299	lncRNA	499601
chr2	9560000	10680000	chr2	9936360	9939590	ENSG00000269973	1	1		lncRNA	3230
chr2	9560000	10680000	chr2	10001757	10006030	ENSG00000188525	4	-1		lncRNA	4273
chr2	9560000	10680000	chr2	9996244	10009762	ENSG00000289033	2	-1		lncRNA	13518
chr2	9560000	10680000	chr2	10021578	10022825	ENSG00000260476	1	1		lncRNA	1247
chr2	9560000	10680000	chr2	10039092	10040663	ENSG00000260077	1	-1		lncRNA	1571
chr2	9560000	10680000	chr2	10054421	10054866	ENSG00000271787	1	-1		lncRNA	445
chr2	9560000	10680000	chr2	10083781	10086101	ENSG00000233502	1	1		lncRNA	2320
chr2	9560000	10680000	chr2	9757496	9770341	ENSG00000243491	1	-1		lncRNA	12845
chr2	9560000	10680000	chr2	9939088	9950817	ENSG00000287305	1	-1		lncRNA	11729
chr2	9560000	10680000	chr2	10287704	10302485	ENSG00000285872	3	-1		lncRNA	14781
chr2	9560000	10680000	chr2	10448654	10457693	ENSG00000257135	8	1	ODC1-DT	lncRNA	9039
chr2	9560000	10680000	chr2	10589166	10604830	ENSG00000234818	1	1		lncRNA	15664
chr2	9560000	10680000	chr2	9671875	9708413	ENSG00000244260	2	1		lncRNA	36538
chr2	9560000	10680000	chr2	9638707	9712920	ENSG00000240687	4	1		lncRNA	74213
chr2	16760000	17760000	chr2	16728121	16769567	ENSG00000223536	7	1		lncRNA	9567
chr2	16760000	17760000	chr2	16970034	16974497	ENSG00000237670	1	1	LINC01866	lncRNA	4463
chr2	20360000	20680000	chr2	20446571	20446893	ENSG00000290108	1	-1		lncRNA	322
chr2	20360000	20680000	chr2	20451042	20452947	ENSG00000228950	1	1		lncRNA	1905
chr2	20360000	20680000	chr2	20499571	20501311	ENSG00000227047	1	-1		lncRNA	1740
chr2	20360000	20680000	chr2	20590775	20592548	ENSG00000231948	2	-1	HS1BP3-IT1	lncRNA	1773
chr2	20360000	20680000	chr2	20586248	20586686	ENSG00000269976	1	-1		lncRNA	438
chr2	20360000	20680000	chr2	20678254	20678932	ENSG00000270100	1	-1		lncRNA	678
chr2	27680000	28520000	chr2	27705786	27716738	ENSG00000205334	4	-1	LINC01460	lncRNA	10952
chr2	27680000	28520000	chr2	28307063	28310560	ENSG00000223522	2	-1		lncRNA	3497
chr2	27680000	28520000	chr2	28396815	28397110	ENSG00000270640	1	1		lncRNA	295
chr2	27680000	28520000	chr2	28448167	28450184	ENSG00000227938	1	-1		lncRNA	2017
chr2	27680000	28520000	chr2	27752831	27757762	ENSG00000289326	2	1		lncRNA	4931
chr2	27680000	28520000	chr2	28384409	28394680	ENSG00000229951	6	-1	FOSL2-AS1	lncRNA	10271
chr2	27680000	28520000	chr2	28425945	28426719	ENSG00000270210	1	1		lncRNA	774
chr2	42800000	43600000	chr2	43041193	43043782	ENSG00000233978	1	-1		lncRNA	2589
chr2	42800000	43600000	chr2	43128819	43131999	ENSG00000286796	1	1		lncRNA	3180
chr2	42800000	43600000	chr2	43227210	43228855	ENSG00000279873	2	1	LINC01126	lncRNA	1645
chr2	42800000	43600000	chr2	43229573	43233394	ENSG00000234936	1	1		lncRNA	3821
chr2	42800000	43600000	chr2	43219849	43223227	ENSG00000287387	1	1		lncRNA	3378
chr2	42800000	43600000	chr2	43092530	43217246	ENSG00000230587	5	-1	LINC02580	lncRNA	124716
chr2	42800000	43600000	chr2	42972255	43040662	ENSG00000231826	9	-1	LINC01819	lncRNA	68407
chr2	45960000	46920000	chr2	46078015	46078828	ENSG00000232696	1	-1		lncRNA	813
chr2	45960000	46920000	chr2	46166789	46167978	ENSG00000231336	1	-1		lncRNA	1189
chr2	45960000	46920000	chr2	46392291	46394228	ENSG00000228100	2	-1	LINC01820	lncRNA	1937
chr2	45960000	46920000	chr2	46852020	46853496	ENSG00000226548	1	-1		lncRNA	1476
chr2	45960000	46920000	chr2	46429190	46441833	ENSG00000187600	14	1	LINC02583	lncRNA	12643
chr2	45960000	46920000	chr2	46429195	46484424	ENSG00000284608	1	1		lncRNA	55229
chr2	45960000	46920000	chr2	46429229	46501278	ENSG00000253515	2	1		lncRNA	72049
chr2	45960000	46920000	chr2	46568256	46580238	ENSG00000250116	2	-1	RHOQ-AS1	lncRNA	11982
chr2	45960000	46920000	chr2	46899275	46908678	ENSG00000228925	1	1		lncRNA	9403
chr2	45960000	46920000	chr2	46816697	46859009	ENSG00000239332	7	1	LINC01119	lncRNA	42312
chr2	45960000	46920000	chr2	46698940	46822804	ENSG00000222005	9	1	LINC01118	lncRNA	123864
chr2	46920000	47400000	chr2	46956615	46956888	ENSG00000272814	1	-1		lncRNA	273
chr2	46920000	47400000	chr2	47067822	47071204	ENSG00000225187	1	1		lncRNA	3382
chr2	46920000	47400000	chr2	47035279	47040524	ENSG00000233845	1	-1		lncRNA	5245
chr2	46920000	47400000	chr2	47225781	47240886	ENSG00000226087	4	1		lncRNA	15105
chr2	46920000	47400000	chr2	47192405	47345074	ENSG00000234690	7	-1	EPCAM-DT	lncRNA	152669
chr2	53840000	55640000	chr2	54115268	54115795	ENSG00000289065	1	-1		lncRNA	527
chr2	53840000	55640000	chr2	54545368	54546677	ENSG00000234943	2	-1		lncRNA	1309
chr2	53840000	55640000	chr2	54581577	54582580	ENSG00000289627	1	1		lncRNA	1003
chr2	53840000	55640000	chr2	54747103	54750473	ENSG00000231334	2	-1	EML6-AS1	lncRNA	3370
chr2	53840000	55640000	chr2	55137264	55137831	ENSG00000290071	1	-1		lncRNA	567
chr2	53840000	55640000	chr2	55214387	55216126	ENSG00000203327	2	-1		lncRNA	1739
chr2	53840000	55640000	chr2	55235605	55236047	ENSG00000289606	1	-1		lncRNA	442
chr2	53840000	55640000	chr2	55617869	55618444	ENSG00000272606	2	1	PPP4R3B-DT	lncRNA	575
chr2	53840000	55640000	chr2	54082554	54085066	ENSG00000272156	1	1		lncRNA	2512
chr2	53840000	55640000	chr2	54661011	54680045	ENSG00000238018	2	-1	SPTBN1-AS2	lncRNA	19034
chr2	53840000	55640000	chr2	55282350	55346049	ENSG00000240401	9	1		lncRNA	63699
chr2	53840000	55640000	chr2	54768492	54801540	ENSG00000285519	1	-1		lncRNA	33048
chr2	53840000	55640000	chr2	54516048	54540697	ENSG00000228108	1	-1	SPTBN1-AS1	lncRNA	24649
chr2	57640000	58560000	chr2	58040211	58046700	ENSG00000287875	1	-1		lncRNA	6489
chr2	57640000	58560000	chr2	58241349	58241686	ENSG00000273063	1	1		lncRNA	337
chr2	57640000	58560000	chr2	58275532	58296817	ENSG00000225226	2	1	LINC01795	lncRNA	21285
chr2	57640000	58560000	chr2	58429434	58479766	ENSG00000289529	2	-1		lncRNA	50332
chr2	57640000	58560000	chr2	58427738	59063766	ENSG00000233723	11	1	LINC01122	lncRNA	132262
chr2	61880000	62440000	chr2	61878940	61881353	ENSG00000286360	1	1		lncRNA	1353
chr2	61880000	62440000	chr2	61868432	61886082	ENSG00000236498	1	1		lncRNA	6082
chr2	61880000	62440000	chr2	62069447	62146881	ENSG00000229839	6	-1		lncRNA	77434
chr2	61880000	62440000	chr2	62296246	62464073	ENSG00000228541	3	1		lncRNA	143754
chr2	62440000	63560000	chr2	62817764	62819706	ENSG00000286524	1	-1		lncRNA	1942
chr2	62440000	63560000	chr2	62826064	62858438	ENSG00000226605	1	-1		lncRNA	32374
chr2	62440000	63560000	chr2	62296246	62464073	ENSG00000228541	3	1		lncRNA	24073
chr2	62440000	63560000	chr2	62533681	62662829	ENSG00000226622	7	-1		lncRNA	129148
chr2	62440000	63560000	chr2	63106879	63197037	ENSG00000286480	1	1		lncRNA	90158
chr2	62440000	63560000	chr2	62957326	63048640	ENSG00000231609	7	-1	EHBP1-AS1	lncRNA	91314
chr2	64000000	65240000	chr2	64086353	64088246	ENSG00000228079	2	-1		lncRNA	1893
chr2	64000000	65240000	chr2	64275361	64275503	ENSG00000290118	1	-1		lncRNA	142
chr2	64000000	65240000	chr2	64330481	64332801	ENSG00000238012	2	-1		lncRNA	2320
chr2	64000000	65240000	chr2	64522187	64524110	ENSG00000260101	2	-1	AFTPH-DT	lncRNA	1923
chr2	64000000	65240000	chr2	64606975	64616556	ENSG00000233694	6	1	LINC02579	lncRNA	9581
chr2	64000000	65240000	chr2	64644612	64646698	ENSG00000226756	1	1		lncRNA	2086
chr2	64000000	65240000	chr2	64185078	64205485	ENSG00000230923	2	-1	LINC00309	lncRNA	20407
chr2	64000000	65240000	chr2	64338067	64341647	ENSG00000238201	1	-1		lncRNA	3580
chr2	64000000	65240000	chr2	64337103	64341709	ENSG00000289176	1	-1		lncRNA	4606
chr2	64000000	65240000	chr2	64273709	64291656	ENSG00000288932	2	1		lncRNA	17947
chr2	64000000	65240000	chr2	64395220	64453967	ENSG00000223935	3	-1	LGALSL-DT	lncRNA	58747
chr2	64000000	65240000	chr2	64765463	64767873	ENSG00000288986	1	-1		lncRNA	2410
chr2	64000000	65240000	chr2	64836985	64848264	ENSG00000287123	1	1		lncRNA	11279
chr2	64000000	65240000	chr2	64846130	64863626	ENSG00000234572	1	-1	LINC01800	lncRNA	17496
chr2	64000000	65240000	chr2	65030720	65053017	ENSG00000232613	7	1	LINC02576	lncRNA	22297
chr2	64000000	65240000	chr2	64486353	64500904	ENSG00000223863	1	1	LINC01805	lncRNA	14551
chr2	64000000	65240000	chr2	64143239	64257610	ENSG00000225889	10	1		lncRNA	114371
chr2	64000000	65240000	chr2	64901840	65056226	ENSG00000237638	3	-1	LINC02245	lncRNA	154386
chr2	69520000	70280000	chr2	69663299	69664331	ENSG00000289250	1	1		lncRNA	1032
chr2	69520000	70280000	chr2	69700192	69713847	ENSG00000231024	1	-1		lncRNA	13655
chr2	69520000	70280000	chr2	70124034	70132923	ENSG00000231327	3	-1	LINC01816	lncRNA	8889
chr2	69520000	70280000	chr2	69789544	69799008	ENSG00000288869	2	-1	SMANTIS	lncRNA	9464
chr2	69520000	70280000	chr2	70089721	70096100	ENSG00000233060	1	1		lncRNA	6379
chr2	69520000	70280000	chr2	69960104	70103220	ENSG00000179818	17	-1	PCBP1-AS1	lncRNA	143116
chr2	71080000	73240000	chr2	71112877	71117406	ENSG00000288065	1	1		lncRNA	4529
chr2	71080000	73240000	chr2	71373938	71376320	ENSG00000281195	1	1		lncRNA	2382
chr2	71080000	73240000	chr2	71419974	71422314	ENSG00000289463	1	1		lncRNA	2340
chr2	71080000	73240000	chr2	71453081	71454470	ENSG00000289327	2	-1		lncRNA	1389
chr2	71080000	73240000	chr2	72144651	72145787	ENSG00000289615	2	1		lncRNA	1136
chr2	71080000	73240000	chr2	72932974	72934355	ENSG00000278060	1	-1		lncRNA	1381
chr2	71080000	73240000	chr2	73113018	73115907	ENSG00000272702	1	1		lncRNA	2889
chr2	84440000	84920000	chr2	84459572	84460324	ENSG00000289076	2	1		lncRNA	752
chr2	84920000	85320000	chr2	84969747	84970695	ENSG00000290085	1	-1		lncRNA	948
chr2	84920000	85320000	chr2	85186409	85187253	ENSG00000231134	1	1	TCF7L1-IT1	lncRNA	844
chr2	84920000	85320000	chr2	85061213	85067347	ENSG00000260840	2	-1	LINC01964	lncRNA	6134
chr2	84920000	85320000	chr2	84926019	84966685	ENSG00000287625	1	1		lncRNA	40666
chr2	85320000	85640000	chr2	85328084	85328814	ENSG00000290110	1	1		lncRNA	730
chr2	85320000	85640000	chr2	85387074	85387146	ENSG00000273196	1	-1		lncRNA	72
chr2	85320000	85640000	chr2	85537462	85538783	ENSG00000286532	2	-1	PARTICL	lncRNA	1321
chr2	85320000	85640000	chr2	85594864	85595586	ENSG00000288858	2	-1		lncRNA	722
chr2	85320000	85640000	chr2	85418504	85426724	ENSG00000286011	2	1		lncRNA	8220
chr2	87960000	92080000	chr2	88016780	88021451	ENSG00000287670	1	1		lncRNA	4671
chr2	87960000	92080000	chr2	88136919	88138589	ENSG00000288734	2	-1		lncRNA	1670
chr2	87960000	92080000	chr2	88627539	88631821	ENSG00000234028	4	1	EIF2AK3-DT	lncRNA	4282
chr2	87960000	92080000	chr2	88864876	88866196	ENSG00000290104	1	-1		lncRNA	1320
chr2	87960000	92080000	chr2	90365737	90367699	ENSG00000281904	1	1		lncRNA	1962
chr2	87960000	92080000	chr2	91580336	91580863	ENSG00000261600	1	1		lncRNA	527
chr2	87960000	92080000	chr2	88538720	88575610	ENSG00000225420	1	1		lncRNA	36890
chr2	87960000	92080000	chr2	88811186	88861563	ENSG00000240040	6	-1		lncRNA	50377
chr2	87960000	92080000	chr2	88811186	88825207	ENSG00000290802	1	-1		lncRNA	14021
chr2	87960000	92080000	chr2	88765807	88806612	ENSG00000291127	1	1	ANKRD36BP2	lncRNA	40805
chr2	87960000	92080000	chr2	89542842	89585652	ENSG00000290846	1	-1		lncRNA	42810
chr2	87960000	92080000	chr2	91686102	91712110	ENSG00000290565	1	-1		lncRNA	26008
chr2	87960000	92080000	chr2	91759462	91767701	ENSG00000286698	1	-1		lncRNA	8239
chr2	87960000	92080000	chr2	91892472	91914212	ENSG00000290575	1	-1		lncRNA	21740
chr2	87960000	92080000	chr2	91587019	91660038	ENSG00000291150	1	-1	LSP1P5	lncRNA	73019
chr2	97520000	98400000	chr2	98346995	98351140	ENSG00000227987	1	1		lncRNA	4145
chr2	97520000	98400000	chr2	97618638	97638417	ENSG00000286036	1	1		lncRNA	19779
chr2	97520000	98400000	chr2	98331389	98356005	ENSG00000222000	7	-1		lncRNA	24616
chr2	99520000	100560000	chr2	100104919	100107504	ENSG00000230393	1	1		lncRNA	2585
chr2	99520000	100560000	chr2	100208254	100251484	ENSG00000232084	5	1	LINC01104	lncRNA	43230
chr2	101000000	101280000	chr2	100993676	101002244	ENSG00000223947	1	-1		lncRNA	2244
chr2	101000000	101280000	chr2	101151660	101155412	ENSG00000272902	2	1	TBC1D8-AS1	lncRNA	3752
chr2	108760000	110240000	chr2	109127327	109128930	ENSG00000259863	1	-1	SH3RF3-AS1	lncRNA	1603
chr2	108760000	110240000	chr2	109594693	109605698	ENSG00000230696	1	-1		lncRNA	11005
chr2	108760000	110240000	chr2	109758799	109760364	ENSG00000282033	1	-1		lncRNA	1565
chr2	108760000	110240000	chr2	109987063	109996140	ENSG00000204588	5	1	LINC01123	lncRNA	9077
chr2	108760000	110240000	chr2	109933161	109968577	ENSG00000290731	1	1		lncRNA	35416
chr2	108760000	110240000	chr2	109937438	109985124	ENSG00000283684	1	1		lncRNA	47686
chr2	108760000	110240000	chr2	110231106	110266559	ENSG00000290732	1	1		lncRNA	8894
chr2	111800000	113440000	chr2	112061084	112063709	ENSG00000287141	1	-1		lncRNA	2625
chr2	111800000	113440000	chr2	112239621	112244375	ENSG00000286545	1	1		lncRNA	4754
chr2	111800000	113440000	chr2	112641832	112645720	ENSG00000237753	2	-1	SLC20A1-DT	lncRNA	3888
chr2	111800000	113440000	chr2	113171535	113175360	ENSG00000234174	1	-1		lncRNA	3825
chr2	111800000	113440000	chr2	113370392	113374994	ENSG00000289035	1	-1		lncRNA	4602
chr2	111800000	113440000	chr2	113432600	113436042	ENSG00000272563	1	1		lncRNA	3442
chr2	111800000	113440000	chr2	112039378	112055337	ENSG00000286904	1	-1		lncRNA	15959
chr2	111800000	113440000	chr2	112817076	112824457	ENSG00000287937	1	-1		lncRNA	7381
chr2	111800000	113440000	chr2	112589040	112614431	ENSG00000243389	1	1		lncRNA	25391
chr2	111800000	113440000	chr2	112590796	112591939	ENSG00000228251	1	1		lncRNA	1143
chr2	111800000	113440000	chr2	113325009	113430988	ENSG00000234997	3	1	LINC02966	lncRNA	105979
chr2	111800000	113440000	chr2	113211421	113276581	ENSG00000189223	15	1	PAX8-AS1	lncRNA	65160
chr2	119360000	120680000	chr2	119476428	119487346	ENSG00000231013	2	1	SCTR-AS1	lncRNA	10918
chr2	119360000	120680000	chr2	120542905	120545249	ENSG00000237614	3	-1		lncRNA	2344
chr2	119360000	120680000	chr2	120255848	120259223	ENSG00000289091	2	-1		lncRNA	3375
chr2	119360000	120680000	chr2	120552481	120558119	ENSG00000232140	2	-1		lncRNA	5638
chr2	119360000	120680000	chr2	120319007	120326298	ENSG00000235840	1	1		lncRNA	7291
chr2	119360000	120680000	chr2	120174885	120216544	ENSG00000224789	1	-1		lncRNA	41659
chr2	155320000	157280000	chr2	156305108	156320255	ENSG00000282440	1	-1		lncRNA	15147
chr2	155320000	157280000	chr2	156655224	156695659	ENSG00000283436	1	1	LINC01958	lncRNA	40435
chr2	155320000	157280000	chr2	156788731	156865701	ENSG00000287048	1	1		lncRNA	76970
chr2	155320000	157280000	chr2	156803339	156891160	ENSG00000286889	1	1		lncRNA	87821
chr2	155320000	157280000	chr2	157033837	157049716	ENSG00000286530	1	1		lncRNA	15879
chr2	155320000	157280000	chr2	155525424	155664668	ENSG00000286679	1	1		lncRNA	139244
chr2	155320000	157280000	chr2	156011530	156254950	ENSG00000226383	7	-1	LINC01876	lncRNA	243420
chr2	160040000	161240000	chr2	160257716	160271880	ENSG00000285373	3	-1	LINC02478	lncRNA	14164
chr2	160040000	161240000	chr2	161096231	161160224	ENSG00000224467	1	-1	TANK-AS1	lncRNA	63993
chr2	160040000	161240000	chr2	161222785	161308389	ENSG00000235724	10	-1	PSMD14-DT	lncRNA	17215
chr2	160040000	161240000	chr2	160141981	160271888	ENSG00000285155	1	-1		lncRNA	129907
chr2	168120000	168960000	chr2	168771951	168786961	ENSG00000227617	9	-1	CERS6-AS1	lncRNA	15010
chr2	171560000	172120000	chr2	172081990	172083704	ENSG00000288958	1	-1		lncRNA	1714
chr2	171560000	172120000	chr2	172091379	172093655	ENSG00000289413	1	-1		lncRNA	2276
chr2	171560000	172120000	chr2	172103006	172109982	ENSG00000236651	1	1	DLX2-DT	lncRNA	6976
chr2	172160000	172720000	chr2	172234230	172237223	ENSG00000288048	1	1		lncRNA	2993
chr2	172160000	172720000	chr2	172427774	172428603	ENSG00000226963	1	-1		lncRNA	829
chr2	172160000	172720000	chr2	172464262	172466022	ENSG00000232788	1	-1	ITGA6-AS1	lncRNA	1760
chr2	172160000	172720000	chr2	172323260	172330582	ENSG00000286557	1	-1		lncRNA	7322
chr2	172160000	172720000	chr2	172677141	172736206	ENSG00000228016	1	-1	RAPGEF4-AS1	lncRNA	42859
chr2	172160000	172720000	chr2	172137345	172370401	ENSG00000232555	2	1		lncRNA	210401
chr2	172160000	172720000	chr2	172480840	172556596	ENSG00000225205	5	-1	PDK1-AS1	lncRNA	75756
chr2	173360000	174440000	chr2	173811076	173811392	ENSG00000270460	1	1		lncRNA	316
chr2	173360000	174440000	chr2	173968351	173969418	ENSG00000271151	1	1		lncRNA	1067
chr2	173360000	174440000	chr2	173965488	173966068	ENSG00000289296	2	1		lncRNA	580
chr2	173360000	174440000	chr2	174011856	174012975	ENSG00000273258	1	-1		lncRNA	1119
chr2	173360000	174440000	chr2	174025280	174027163	ENSG00000260868	1	1	LINC01960	lncRNA	1883
chr2	173360000	174440000	chr2	174326027	174330643	ENSG00000231453	1	1	LINC01305	lncRNA	4616
chr2	177160000	177840000	chr2	177264359	177265515	ENSG00000222043	2	1		lncRNA	1156
chr2	177160000	177840000	chr2	177300600	177302006	ENSG00000271825	1	1		lncRNA	1406
chr2	177160000	177840000	chr2	177603089	177618572	ENSG00000237655	1	1		lncRNA	15483
chr2	177160000	177840000	chr2	177306373	177310572	ENSG00000271996	1	1		lncRNA	4199
chr2	177160000	177840000	chr2	177653419	177723289	ENSG00000229941	6	1	PDE11A-AS1	lncRNA	69870
chr2	177160000	177840000	chr2	176989418	177164656	ENSG00000236501	6	-1		lncRNA	4656
chr2	177160000	177840000	chr2	177271125	177392699	ENSG00000213963	7	-1		lncRNA	121574
chr2	177160000	177840000	chr2	177111036	177212662	ENSG00000229337	2	-1		lncRNA	52662
chr2	178680000	179960000	chr2	178723457	178727046	ENSG00000267784	1	1		lncRNA	3589
chr2	178680000	179960000	chr2	179273831	179285707	ENSG00000237477	1	1		lncRNA	11876
chr2	178680000	179960000	chr2	178828349	179007807	ENSG00000287149	1	1		lncRNA	179458
chr2	178680000	179960000	chr2	178521183	178779963	ENSG00000237298	11	1	TTN-AS1	lncRNA	99963
chr2	181720000	182160000	chr2	181887851	181891663	ENSG00000260742	1	-1	ITPRID2-DT	lncRNA	3812
chr2	187480000	188520000	chr2	188033794	188040601	ENSG00000289205	2	1		lncRNA	6807
chr2	187480000	188520000	chr2	187003220	187556288	ENSG00000224063	6	1	CALCRL-AS1	lncRNA	76288
chr2	187480000	188520000	chr2	187712816	188384365	ENSG00000231689	3	-1	LINC01090	lncRNA	671549
chr2	190320000	191040000	chr2	190454092	190454521	ENSG00000272979	1	-1		lncRNA	429
chr2	190320000	191040000	chr2	190457656	190460052	ENSG00000290089	1	-1		lncRNA	2396
chr2	190320000	191040000	chr2	190880797	190882059	ENSG00000235852	1	-1		lncRNA	1262
chr2	190320000	191040000	chr2	191017954	191019079	ENSG00000230686	1	1		lncRNA	1125
chr2	190320000	191040000	chr2	191021526	191032314	ENSG00000231858	5	1	STAT4-AS1	lncRNA	10788
chr2	190320000	191040000	chr2	190534855	190569776	ENSG00000233654	2	1	NEMP2-DT	lncRNA	34921
chr2	190320000	191040000	chr2	190607660	190649840	ENSG00000284052	1	-1		lncRNA	42180
chr2	190320000	191040000	chr2	190672297	190843734	ENSG00000228509	7	-1		lncRNA	171437
chr2	199920000	200720000	chr2	200086870	200100025	ENSG00000287027	1	1		lncRNA	13155
chr2	199920000	200720000	chr2	200695723	200748040	ENSG00000284084	1	1	AOX3P-AOX2P	lncRNA	24277
chr2	199920000	200720000	chr2	200695734	200734109	ENSG00000290905	1	1		lncRNA	24266
chr2	199920000	200720000	chr2	200711535	200735203	ENSG00000237166	4	-1	LINC01792	lncRNA	8465
chr2	199920000	200720000	chr2	200390666	200478018	ENSG00000287299	1	-1		lncRNA	87352
chr2	218160000	219720000	chr2	218255319	218257366	ENSG00000261338	2	1		lncRNA	2047
chr2	218160000	219720000	chr2	218366661	218367885	ENSG00000225062	2	-1	CATIP-AS1	lncRNA	1224
chr2	218160000	219720000	chr2	218368113	218368857	ENSG00000288819	2	1		lncRNA	744
chr2	218160000	219720000	chr2	218398743	218399219	ENSG00000273361	1	-1		lncRNA	476
chr2	218160000	219720000	chr2	218799729	218802554	ENSG00000286154	1	-1		lncRNA	2825
chr2	218160000	219720000	chr2	218818690	218819144	ENSG00000272555	1	1		lncRNA	454
chr2	218160000	219720000	chr2	219065308	219070022	ENSG00000286606	1	1		lncRNA	4714
chr2	218160000	219720000	chr2	219177068	219177530	ENSG00000290093	1	1		lncRNA	462
chr2	218160000	219720000	chr2	219198640	219200034	ENSG00000287529	1	-1		lncRNA	1394
chr2	218160000	219720000	chr2	219425071	219426184	ENSG00000234638	1	-1		lncRNA	1113
chr2	218160000	219720000	chr2	219497611	219498706	ENSG00000268603	2	-1		lncRNA	1095
chr2	218160000	219720000	chr2	219547211	219547658	ENSG00000268896	1	-1		lncRNA	447
chr2	218160000	219720000	chr2	219559083	219559626	ENSG00000269068	1	1		lncRNA	543
chr2	218160000	219720000	chr2	219625059	219626693	ENSG00000228973	1	-1		lncRNA	1634
chr2	218160000	219720000	chr2	219645090	219645631	ENSG00000267919	1	1		lncRNA	541
chr2	218160000	219720000	chr2	218326889	218357966	ENSG00000237281	1	-1	CATIP-AS2	lncRNA	31077
chr2	218160000	219720000	chr2	218900811	218930636	ENSG00000228135	1	-1	LINC01494	lncRNA	29825
chr2	218160000	219720000	chr2	218944629	218961903	ENSG00000235024	1	-1	CDK5R2-AS1	lncRNA	17274
chr2	218160000	219720000	chr2	218975393	218989940	ENSG00000236445	5	1	LINC00608	lncRNA	14547
chr2	218160000	219720000	chr2	219002215	219015721	ENSG00000224090	1	1		lncRNA	13506
chr2	218160000	219720000	chr2	218909158	218939965	ENSG00000288898	1	1		lncRNA	30807
chr2	218160000	219720000	chr2	219299002	219304130	ENSG00000230432	1	1		lncRNA	5128
chr2	218160000	219720000	chr2	219388496	219403633	ENSG00000229525	1	1	DNPEP-AS1	lncRNA	15137
chr2	218160000	219720000	chr2	219482073	219516877	ENSG00000227432	1	-1	ASIC4-AS1	lncRNA	34804
chr2	218160000	219720000	chr2	219685381	219737937	ENSG00000227308	2	1	LINC02832	lncRNA	34619
chr2	222640000	223960000	chr2	222917387	222919363	ENSG00000234193	1	-1	ACSL3-AS1	lncRNA	1976
chr2	222640000	223960000	chr2	223498773	223504611	ENSG00000231189	1	1		lncRNA	5838
chr2	222640000	223960000	chr2	223505476	223510933	ENSG00000235610	1	1		lncRNA	5457
chr2	225640000	227320000	chr2	225668964	225670631	ENSG00000289265	1	1		lncRNA	1667
chr2	225640000	227320000	chr2	226804036	226805061	ENSG00000261379	1	1		lncRNA	1025
chr2	225640000	227320000	chr2	226835333	226835943	ENSG00000290086	1	-1		lncRNA	610
chr2	225640000	227320000	chr2	226180044	226185371	ENSG00000235070	3	-1		lncRNA	5327
chr2	225640000	227320000	chr2	226800146	226813741	ENSG00000272622	2	1		lncRNA	13595
chr2	225640000	227320000	chr2	227221052	227325711	ENSG00000236432	8	-1	MFF-DT	lncRNA	98948
chr2	229760000	230840000	chr2	229942728	229945137	ENSG00000231534	1	1	FBXO36-IT1	lncRNA	2409
chr2	229760000	230840000	chr2	230657823	230659323	ENSG00000289157	1	-1		lncRNA	1500
chr2	229760000	230840000	chr2	230690065	230700529	ENSG00000226125	2	-1	LINC01907	lncRNA	10464
chr2	229760000	230840000	chr2	230520594	230580006	ENSG00000235419	5	-1		lncRNA	59412
chr2	229760000	230840000	chr2	230121370	230174223	ENSG00000225963	8	1		lncRNA	52853
chr2	231520000	232560000	chr2	231518582	231521067	ENSG00000286942	1	-1		lncRNA	1067
chr2	231520000	232560000	chr2	231588959	231592776	ENSG00000286399	1	-1		lncRNA	3817
chr2	231520000	232560000	chr2	231705829	231707035	ENSG00000289018	2	-1		lncRNA	1206
chr2	231520000	232560000	chr2	231809846	231812352	ENSG00000261096	1	1		lncRNA	2506
chr2	231520000	232560000	chr2	232379635	232381674	ENSG00000224516	5	-1		lncRNA	2039
chr2	231520000	232560000	chr2	232385750	232387044	ENSG00000290681	1	-1	ECEL1P2	lncRNA	1294
chr2	231520000	232560000	chr2	232420661	232421461	ENSG00000237087	1	-1		lncRNA	800
chr2	231520000	232560000	chr2	231978488	232015720	ENSG00000227033	1	-1		lncRNA	37232
chr2	232560000	233360000	chr2	233177184	233180112	ENSG00000289129	2	-1		lncRNA	2928
chr2	232560000	233360000	chr2	233351132	233353416	ENSG00000259793	1	-1		lncRNA	2284
chr2	232560000	233360000	chr2	232580948	232611971	ENSG00000237126	8	-1		lncRNA	31023
chr2	232560000	233360000	chr2	232760146	232767949	ENSG00000241409	1	-1		lncRNA	7803
chr2	232560000	233360000	chr2	233012614	233015885	ENSG00000222001	2	1		lncRNA	3271
chr2	233560000	234520000	chr2	234109081	234109481	ENSG00000226442	2	1		lncRNA	400
chr2	233560000	234520000	chr2	234222838	234224514	ENSG00000261298	1	1		lncRNA	1676
chr2	233560000	234520000	chr2	234351247	234356038	ENSG00000288040	1	-1		lncRNA	4791
chr2	233560000	234520000	chr2	234444590	234454595	ENSG00000231682	1	-1	LINC01891	lncRNA	10005
chr2	233560000	234520000	chr2	233946146	233955435	ENSG00000237581	1	-1		lncRNA	9289
chr2	233560000	234520000	chr2	233977872	233980018	ENSG00000286059	1	-1		lncRNA	2146
chr2	233560000	234520000	chr2	234438328	234462127	ENSG00000228162	2	1		lncRNA	23799
chr2	233560000	234520000	chr2	233693434	233708699	ENSG00000224814	1	-1		lncRNA	15265
chr2	234520000	235120000	chr2	235084822	235088586	ENSG00000226542	1	-1		lncRNA	3764
chr2	234520000	235120000	chr2	234682668	234717764	ENSG00000280744	1	1	LINC01173	lncRNA	35096
chr2	234520000	235120000	chr2	234803808	234913384	ENSG00000235726	7	-1		lncRNA	109576
chr2	238280000	240160000	chr2	238289127	238300185	ENSG00000283635	1	1		lncRNA	11058
chr2	238280000	240160000	chr2	238295392	238300620	ENSG00000232306	2	-1		lncRNA	5228
chr2	238280000	240160000	chr2	238427077	238427729	ENSG00000229915	1	-1		lncRNA	652
chr2	238280000	240160000	chr2	238788648	238789716	ENSG00000226992	1	-1		lncRNA	1068
chr2	238280000	240160000	chr2	238919302	238926269	ENSG00000227744	4	-1	LINC01940	lncRNA	6967
chr2	238280000	240160000	chr2	239114858	239118842	ENSG00000286307	1	1		lncRNA	3984
chr2	238280000	240160000	chr2	239194118	239197654	ENSG00000287405	1	1		lncRNA	3536
chr2	238280000	240160000	chr2	239401436	239402657	ENSG00000222020	5	1	HDAC4-AS1	lncRNA	1221
chr2	238280000	240160000	chr2	239493587	239496697	ENSG00000288082	1	-1		lncRNA	3110
chr2	238280000	240160000	chr2	239538379	239544876	ENSG00000286188	1	1		lncRNA	6497
chr2	238280000	240160000	chr2	239625698	239630839	ENSG00000227459	1	1		lncRNA	5141
chr2	238280000	240160000	chr2	239734956	239735538	ENSG00000259889	1	1		lncRNA	582
chr2	238280000	240160000	chr2	238711224	238722543	ENSG00000286160	2	-1		lncRNA	11319
chr2	238280000	240160000	chr2	238771768	238784764	ENSG00000286748	1	1		lncRNA	12996
chr2	238280000	240160000	chr2	239578301	239586094	ENSG00000196758	3	1	LINC02991	lncRNA	7793
chr2	238280000	240160000	chr2	239762860	239824764	ENSG00000220256	4	1		lncRNA	61904
chr2	238280000	240160000	chr2	238554541	238740849	ENSG00000234279	2	1	LINC01937	lncRNA	186308
chr2	238280000	240160000	chr2	238510690	238555054	ENSG00000225493	1	-1	LINC01107	lncRNA	44364
chr2	238280000	240160000	chr2	239439595	239531363	ENSG00000286525	3	1		lncRNA	91768
chr3	4280000	5200000	chr3	4490312	4493201	ENSG00000231249	3	-1	ITPR1-DT	lncRNA	2889
chr3	4280000	5200000	chr3	5187172	5188298	ENSG00000268509	2	-1		lncRNA	1126
chr3	4280000	5200000	chr3	4269153	4311495	ENSG00000286579	1	-1		lncRNA	31495
chr3	4280000	5200000	chr3	4749192	4751590	ENSG00000235947	1	-1	EGOT	lncRNA	2398
chr3	4280000	5200000	chr3	4896806	4980414	ENSG00000235831	8	-1	BHLHE40-AS1	lncRNA	83608
chr3	4280000	5200000	chr3	5156905	5187329	ENSG00000233912	1	-1		lncRNA	30424
chr3	4280000	5200000	chr3	4793222	4887293	ENSG00000235978	8	-1		lncRNA	94071
chr3	7320000	8640000	chr3	8359344	8366427	ENSG00000231401	2	-1		lncRNA	7083
chr3	7320000	8640000	chr3	7519741	7560333	ENSG00000236202	1	-1	GRM7-AS1	lncRNA	40592
chr3	7320000	8640000	chr3	8079322	8125538	ENSG00000228351	3	1		lncRNA	46216
chr3	7320000	8640000	chr3	8573726	8593124	ENSG00000224884	1	-1		lncRNA	19398
chr3	7320000	8640000	chr3	7606890	7790482	ENSG00000270207	2	-1		lncRNA	183592
chr3	7320000	8640000	chr3	7951263	8611924	ENSG00000227110	7	-1	LMCD1-AS1	lncRNA	660661
chr3	10760000	12560000	chr3	10759350	10764209	ENSG00000226567	2	-1	LINC00606	lncRNA	4209
chr3	10760000	12560000	chr3	10767464	10771718	ENSG00000230599	2	1		lncRNA	4254
chr3	10760000	12560000	chr3	11183856	11184935	ENSG00000288969	1	1		lncRNA	1079
chr3	10760000	12560000	chr3	11607184	11610748	ENSG00000271716	1	1		lncRNA	3564
chr3	10760000	12560000	chr3	11611602	11612197	ENSG00000272483	1	1		lncRNA	595
chr3	10760000	12560000	chr3	10914196	10977981	ENSG00000286962	1	-1		lncRNA	63785
chr3	10760000	12560000	chr3	11060973	11091548	ENSG00000287964	1	1		lncRNA	30575
chr3	10760000	12560000	chr3	11193439	11225877	ENSG00000285906	2	-1		lncRNA	32438
chr3	10760000	12560000	chr3	11006098	11019224	ENSG00000232287	2	-1	SLC6A1-AS1	lncRNA	13126
chr3	10760000	12560000	chr3	12178694	12234278	ENSG00000288952	2	-1		lncRNA	55584
chr3	23120000	23880000	chr3	23804024	23806905	ENSG00000223791	1	-1	UBE2E1-AS1	lncRNA	2881
chr3	23120000	23880000	chr3	23194929	23202703	ENSG00000233153	6	-1	UBE2E2-DT	lncRNA	7774
chr3	27120000	27680000	chr3	27369568	27387960	ENSG00000287348	1	1		lncRNA	18392
chr3	30000000	30760000	chr3	30697661	30699576	ENSG00000261468	1	1		lncRNA	1915
chr3	30000000	30760000	chr3	30292502	30305037	ENSG00000287774	3	1		lncRNA	12535
chr3	30000000	30760000	chr3	30521664	30526254	ENSG00000227549	2	-1		lncRNA	4590
chr3	30000000	30760000	chr3	30518833	30527193	ENSG00000227260	2	1	LINC01985	lncRNA	8360
chr3	30000000	30760000	chr3	30373063	30469302	ENSG00000289450	2	1		lncRNA	96239
chr3	30760000	33840000	chr3	31530910	31532419	ENSG00000288926	2	-1		lncRNA	1509
chr3	30760000	33840000	chr3	32236688	32238599	ENSG00000261572	2	-1		lncRNA	1911
chr3	30760000	33840000	chr3	33793644	33798539	ENSG00000271643	2	-1	PDCD6IP-DT	lncRNA	4895
chr3	30760000	33840000	chr3	32730635	32737454	ENSG00000251224	1	-1	CNOT10-AS1	lncRNA	6819
chr3	30760000	33840000	chr3	33144104	33147721	ENSG00000272149	1	-1		lncRNA	3617
chr3	30760000	33840000	chr3	33275247	33277376	ENSG00000289460	1	-1		lncRNA	2129
chr3	30760000	33840000	chr3	31704058	31721652	ENSG00000232490	6	1	OSBPL10-AS1	lncRNA	17594
chr3	45000000	46600000	chr3	45995958	46001283	ENSG00000288717	1	1		lncRNA	5325
chr3	45000000	46600000	chr3	46416524	46423591	ENSG00000283646	2	-1	LINC02009	lncRNA	7067
chr3	45000000	46600000	chr3	46557398	46559694	ENSG00000268324	2	1	LRRC2-AS1	lncRNA	2296
chr3	45000000	46600000	chr3	46558540	46562495	ENSG00000288718	1	1		lncRNA	3955
chr3	45000000	46600000	chr3	45483974	45509545	ENSG00000232455	2	-1	LARS2-AS1	lncRNA	25571
chr3	45000000	46600000	chr3	45676369	45689200	ENSG00000230530	2	-1	LIMD1-AS1	lncRNA	12831
chr3	45000000	46600000	chr3	45842265	45866571	ENSG00000285788	1	1		lncRNA	24306
chr3	45000000	46600000	chr3	45795970	45863928	ENSG00000288720	2	1		lncRNA	67958
chr3	45000000	46600000	chr3	46065695	46104017	ENSG00000288703	1	1		lncRNA	38322
chr3	45000000	46600000	chr3	46284775	46293795	ENSG00000288724	1	-1		lncRNA	9020
chr3	45000000	46600000	chr3	46364391	46407117	ENSG00000223552	3	-1	CCR5AS	lncRNA	42726
chr3	49680000	50320000	chr3	49684480	49684983	ENSG00000259970	1	-1		lncRNA	503
chr3	49680000	50320000	chr3	49899302	49903757	ENSG00000230698	1	1		lncRNA	4455
chr3	49680000	50320000	chr3	50099603	50100988	ENSG00000281691	1	-1	RBM5-AS1	lncRNA	1385
chr3	49680000	50320000	chr3	50239618	50239984	ENSG00000213600	3	1		lncRNA	366
chr3	49680000	50320000	chr3	50260303	50263358	ENSG00000230454	1	1		lncRNA	3055
chr3	49680000	50320000	chr3	50266631	50267564	ENSG00000232352	3	-1	SEMA3B-AS1	lncRNA	933
chr3	49680000	50320000	chr3	49903845	49916937	ENSG00000228008	1	1		lncRNA	13092
chr3	49680000	50320000	chr3	50116022	50156085	ENSG00000235016	1	-1	SEMA3F-AS1	lncRNA	40063
chr3	56560000	57960000	chr3	57078943	57080101	ENSG00000272202	1	1		lncRNA	1158
chr3	56560000	57960000	chr3	57555581	57556054	ENSG00000287502	1	-1		lncRNA	473
chr3	56560000	57960000	chr3	57597531	57600927	ENSG00000272146	6	1	ARF4-AS1	lncRNA	3396
chr3	56560000	57960000	chr3	57693205	57696596	ENSG00000241933	1	1	DENND6A-DT	lncRNA	3391
chr3	56560000	57960000	chr3	56940040	56960854	ENSG00000240198	5	1	ARHGEF3-AS1	lncRNA	20814
chr3	56560000	57960000	chr3	57293083	57300187	ENSG00000286952	1	1		lncRNA	7104
chr3	56560000	57960000	chr3	57628810	57654918	ENSG00000239801	1	1	DENND6A-AS1	lncRNA	26108
chr3	65760000	66240000	chr3	65893816	65925297	ENSG00000240175	1	1	MAGI1-AS1	lncRNA	31481
chr3	65760000	66240000	chr3	65872815	65954558	ENSG00000272610	1	-1	MAGI1-IT1	lncRNA	81743
chr3	97720000	99000000	chr3	97759523	97761532	ENSG00000261292	2	1		lncRNA	2009
chr3	97720000	99000000	chr3	97973012	97975056	ENSG00000285614	1	1		lncRNA	2044
chr3	97720000	99000000	chr3	98100793	98105672	ENSG00000290819	1	1		lncRNA	4879
chr3	97720000	99000000	chr3	98191359	98196755	ENSG00000289078	1	1		lncRNA	5396
chr3	97720000	99000000	chr3	98522570	98525334	ENSG00000248839	1	1		lncRNA	2764
chr3	97720000	99000000	chr3	98573061	98578231	ENSG00000286602	1	-1		lncRNA	5170
chr3	97720000	99000000	chr3	98981058	98983096	ENSG00000240476	1	1	LINC00973	lncRNA	2038
chr3	97720000	99000000	chr3	97800732	97821923	ENSG00000282527	2	-1		lncRNA	21191
chr3	97720000	99000000	chr3	97836986	97874691	ENSG00000279658	1	-1		lncRNA	37705
chr3	97720000	99000000	chr3	98099908	98148134	ENSG00000249225	1	-1		lncRNA	48226
chr3	97720000	99000000	chr3	98706236	98732757	ENSG00000239445	6	-1	ST3GAL6-AS1	lncRNA	26521
chr3	97720000	99000000	chr3	98233651	98457898	ENSG00000251088	1	1		lncRNA	224247
chr3	97720000	99000000	chr3	98262714	98325219	ENSG00000289509	1	-1		lncRNA	62505
chr3	97720000	99000000	chr3	98902045	99018562	ENSG00000239462	2	1		lncRNA	97955
chr3	102640000	105560000	chr3	102621061	102673986	ENSG00000241754	2	-1		lncRNA	33986
chr3	109240000	111560000	chr3	110527482	110529582	ENSG00000240895	1	-1		lncRNA	2100
chr3	109240000	111560000	chr3	109337740	109382930	ENSG00000289358	1	1		lncRNA	45190
chr3	109240000	111560000	chr3	110966981	110969836	ENSG00000289069	1	-1		lncRNA	2855
chr3	109240000	111560000	chr3	111466313	111497095	ENSG00000239311	1	-1		lncRNA	30782
chr3	109240000	111560000	chr3	109409990	109723273	ENSG00000228980	4	1	LINC01205	lncRNA	313283
chr3	109240000	111560000	chr3	109648107	109810861	ENSG00000242029	1	1		lncRNA	162754
chr3	109240000	111560000	chr3	110888384	111071553	ENSG00000242242	7	-1	NECTIN3-AS1	lncRNA	183169
chr3	111680000	112080000	chr3	111835723	111860730	ENSG00000286492	1	-1		lncRNA	25007
chr3	114280000	115200000	chr3	114684580	114687609	ENSG00000241295	1	1	ZBTB20-AS2	lncRNA	3029
chr3	114280000	115200000	chr3	114873114	114876514	ENSG00000239946	1	1	ZBTB20-AS3	lncRNA	3400
chr3	114280000	115200000	chr3	115100423	115103061	ENSG00000242767	1	1	ZBTB20-AS4	lncRNA	2638
chr3	114280000	115200000	chr3	115147775	115148586	ENSG00000288896	2	1		lncRNA	811
chr3	114280000	115200000	chr3	114314501	114329714	ENSG00000259976	3	-1		lncRNA	15213
chr3	114280000	115200000	chr3	114351771	114388978	ENSG00000241560	7	1	ZBTB20-AS1	lncRNA	37207
chr3	114280000	115200000	chr3	114445521	114529452	ENSG00000242290	2	1	ZBTB20-AS5	lncRNA	83931
chr3	114280000	115200000	chr3	115147605	115564389	ENSG00000242880	2	1		lncRNA	52395
chr3	124720000	125680000	chr3	124723788	124726325	ENSG00000260391	2	1		lncRNA	2537
chr3	124720000	125680000	chr3	124723524	124730422	ENSG00000288713	1	-1		lncRNA	6898
chr3	124720000	125680000	chr3	124781155	124787757	ENSG00000244286	1	1	ITGB5-AS1	lncRNA	6602
chr3	124720000	125680000	chr3	125061448	125063710	ENSG00000288022	1	1		lncRNA	2262
chr3	124720000	125680000	chr3	125375372	125376682	ENSG00000289324	2	1		lncRNA	1310
chr3	129440000	130120000	chr3	129847048	129847957	ENSG00000203644	3	-1		lncRNA	909
chr3	129440000	130120000	chr3	130089433	130094304	ENSG00000248243	1	-1	LINC02014	lncRNA	4871
chr3	129440000	130120000	chr3	129893811	129918578	ENSG00000271270	8	1	TMCC1-DT	lncRNA	24767
chr3	129440000	130120000	chr3	129954105	129969294	ENSG00000250643	1	-1		lncRNA	15189
chr3	129440000	130120000	chr3	130097782	130111506	ENSG00000291081	1	-1		lncRNA	13724
chr3	129440000	130120000	chr3	130111669	130201336	ENSG00000249846	7	1	LINC02021	lncRNA	8331
chr3	138040000	139360000	chr3	139232992	139233522	ENSG00000281473	1	1	PISRT1	lncRNA	530
chr3	138040000	139360000	chr3	139349024	139349371	ENSG00000272656	1	-1		lncRNA	347
chr3	138040000	139360000	chr3	139104185	139125171	ENSG00000232416	3	1	BPESC1	lncRNA	20986
chr3	138040000	139360000	chr3	138935189	138944020	ENSG00000244578	1	-1	LINC01391	lncRNA	8831
chr3	138040000	139360000	chr3	139316157	139340870	ENSG00000286988	1	-1		lncRNA	24713
chr3	146200000	146640000	chr3	146589602	146590325	ENSG00000241457	1	1	PLSCR5-AS1	lncRNA	723
chr3	149480000	149800000	chr3	149648997	149650184	ENSG00000241985	1	-1	WWTR1-IT1	lncRNA	1187
chr3	149480000	149800000	chr3	149656999	149661364	ENSG00000241313	3	1	WWTR1-AS1	lncRNA	4365
chr3	152000000	152960000	chr3	152118173	152151724	ENSG00000239941	1	-1	LINC02917	lncRNA	33551
chr3	152000000	152960000	chr3	152245262	152269590	ENSG00000229619	6	-1	MBNL1-AS1	lncRNA	24328
chr3	152000000	152960000	chr3	152457759	152496813	ENSG00000243305	1	-1		lncRNA	39054
chr3	152000000	152960000	chr3	152648146	152650447	ENSG00000244545	1	1		lncRNA	2301
chr3	152000000	152960000	chr3	152650478	152679450	ENSG00000287706	3	1		lncRNA	28972
chr3	152000000	152960000	chr3	152159528	152205461	ENSG00000289315	2	-1		lncRNA	45933
chr3	153000000	154280000	chr3	153152238	153155303	ENSG00000288787	1	-1		lncRNA	3065
chr3	153000000	154280000	chr3	153161419	153162036	ENSG00000289885	1	1		lncRNA	617
chr3	153000000	154280000	chr3	153221049	153221842	ENSG00000290079	1	-1		lncRNA	793
chr3	153000000	154280000	chr3	153376831	153377562	ENSG00000241912	1	1		lncRNA	731
chr3	153000000	154280000	chr3	153156511	153161775	ENSG00000244268	1	-1		lncRNA	5264
chr3	153000000	154280000	chr3	153357107	153374186	ENSG00000241220	1	1		lncRNA	17079
chr3	153000000	154280000	chr3	153881526	153940836	ENSG00000243486	1	1		lncRNA	59310
chr3	153000000	154280000	chr3	154024401	154121347	ENSG00000243069	9	-1	ARHGEF26-AS1	lncRNA	96946
chr3	153000000	154280000	chr3	153384934	153980186	ENSG00000238755	3	-1	LINC02006	lncRNA	595252
chr3	153000000	154280000	chr3	153431856	153502697	ENSG00000237787	5	1	LINC02877	lncRNA	70841
chr3	156520000	157160000	chr3	156523740	156524247	ENSG00000272990	1	-1		lncRNA	507
chr3	156520000	157160000	chr3	156671859	156674446	ENSG00000243926	3	-1	TIPARP-AS1	lncRNA	2587
chr3	156520000	157160000	chr3	157081738	157088547	ENSG00000241544	2	1	LINC02029	lncRNA	6809
chr3	156520000	157160000	chr3	157088022	157088700	ENSG00000289409	2	-1		lncRNA	678
chr3	156520000	157160000	chr3	157081667	157128595	ENSG00000243629	2	-1	LINC00880	lncRNA	46928
chr3	156520000	157160000	chr3	157089634	157135557	ENSG00000241135	8	1	LINC00881	lncRNA	45923
chr3	156520000	157160000	chr3	156747343	156817062	ENSG00000240875	6	-1	LINC00886	lncRNA	69719
chr3	156520000	157160000	chr3	156143570	156540627	ENSG00000287916	1	1		lncRNA	20627
chr3	170880000	172800000	chr3	171459248	171469702	ENSG00000240497	3	1		lncRNA	10454
chr3	170880000	172800000	chr3	171894436	171895240	ENSG00000235943	1	1	TMEM212-IT1	lncRNA	804
chr3	170880000	172800000	chr3	172560888	172595607	ENSG00000223387	6	-1	LINC02068	lncRNA	34719
chr3	170880000	172800000	chr3	172711151	172725038	ENSG00000287012	1	1		lncRNA	13887
chr3	170880000	172800000	chr3	171815586	171900749	ENSG00000234717	2	-1	TMEM212-AS1	lncRNA	85163
chr3	170880000	172800000	chr3	171941607	171996871	ENSG00000287899	1	1		lncRNA	55264
chr3	170880000	172800000	chr3	170908857	171054973	ENSG00000286856	1	1		lncRNA	146116
chr3	172800000	176480000	chr3	173818896	173820203	ENSG00000289417	1	1		lncRNA	1307
chr3	172800000	176480000	chr3	175473919	175477602	ENSG00000288104	1	-1		lncRNA	3683
chr3	172800000	176480000	chr3	175773145	175776333	ENSG00000225552	1	-1	NAALADL2-AS1	lncRNA	3188
chr3	172800000	176480000	chr3	175938929	175941037	ENSG00000260217	1	-1		lncRNA	2108
chr3	172800000	176480000	chr3	173910498	173920796	ENSG00000228213	5	-1	NLGN1-AS1	lncRNA	10298
chr3	172800000	176480000	chr3	173153737	173336965	ENSG00000237473	2	1		lncRNA	183228
chr3	172800000	176480000	chr3	175234861	175271096	ENSG00000226779	1	-1	NAALADL2-AS2	lncRNA	36235
chr3	172800000	176480000	chr3	176415439	176867838	ENSG00000223715	3	-1	LINC01208	lncRNA	64561
chr3	172800000	176480000	chr3	176287129	176327085	ENSG00000288895	2	-1		lncRNA	39956
chr3	172800000	176480000	chr3	175079307	175115242	ENSG00000230292	5	-1	NAALADL2-AS3	lncRNA	35935
chr3	176480000	178400000	chr3	177621382	177628287	ENSG00000236385	1	-1		lncRNA	6905
chr3	176480000	178400000	chr3	177930758	177940299	ENSG00000225790	3	1		lncRNA	9541
chr3	176480000	178400000	chr3	177952327	177959817	ENSG00000270321	2	-1		lncRNA	7490
chr3	176480000	178400000	chr3	177037405	177047923	ENSG00000231310	3	1	TBL1XR1-AS1	lncRNA	10518
chr3	176480000	178400000	chr3	177294442	177323418	ENSG00000203645	2	1	LINC00501	lncRNA	28976
chr3	176480000	178400000	chr3	177683627	177691250	ENSG00000228561	2	1		lncRNA	7623
chr3	176480000	178400000	chr3	176415439	176867838	ENSG00000223715	3	-1	LINC01208	lncRNA	387838
chr3	176480000	178400000	chr3	176814155	176817001	ENSG00000228308	2	-1	LINC01209	lncRNA	2846
chr3	176480000	178400000	chr3	177441910	177767379	ENSG00000228221	6	1	LINC00578	lncRNA	325469
chr3	176480000	178400000	chr3	178028130	178172449	ENSG00000286003	1	-1		lncRNA	144319
chr3	176480000	178400000	chr3	177816865	177899224	ENSG00000231574	7	1	LINC02015	lncRNA	82359
chr3	176480000	178400000	chr3	177337628	177349166	ENSG00000226782	2	-1		lncRNA	11538
chr3	176480000	178400000	chr3	178164008	178385479	ENSG00000223930	9	-1		lncRNA	221471
chr3	184840000	185600000	chr3	185162871	185191955	ENSG00000223358	5	1	EHHADH-AS1	lncRNA	29084
chr3	184840000	185600000	chr3	185499140	185501109	ENSG00000286086	1	1		lncRNA	1969
chr3	185640000	185920000	chr3	185712528	185729787	ENSG00000163915	7	1	IGF2BP2-AS1	lncRNA	17259
chr3	187720000	189200000	chr3	187744552	187744906	ENSG00000290021	1	-1		lncRNA	354
chr3	187720000	189200000	chr3	187745152	187745403	ENSG00000289331	2	-1		lncRNA	251
chr3	187720000	189200000	chr3	187796187	187805258	ENSG00000224049	1	1		lncRNA	9071
chr3	187720000	189200000	chr3	187997422	188003990	ENSG00000225058	1	-1		lncRNA	6568
chr3	187720000	189200000	chr3	188001700	188003406	ENSG00000236412	1	-1		lncRNA	1706
chr3	187720000	189200000	chr3	188941196	188947679	ENSG00000234076	2	-1	TPRG1-AS1	lncRNA	6483
chr3	187720000	189200000	chr3	187702313	187733849	ENSG00000228804	5	1		lncRNA	13849
chr3	187720000	189200000	chr3	187932764	187946221	ENSG00000236864	1	-1		lncRNA	13457
chr3	187720000	189200000	chr3	187958775	187976407	ENSG00000224187	1	-1	LINC01991	lncRNA	17632
chr3	187720000	189200000	chr3	188107072	188147310	ENSG00000234238	2	1		lncRNA	40238
chr3	187720000	189200000	chr3	188151206	188154069	ENSG00000270959	2	-1	LPP-AS2	lncRNA	2863
chr3	187720000	189200000	chr3	188300455	188301990	ENSG00000288794	1	1		lncRNA	1535
chr3	187720000	189200000	chr3	188562238	188568666	ENSG00000224563	1	-1	LPP-AS1	lncRNA	6428
chr3	193600000	194360000	chr3	193770543	193772424	ENSG00000286624	1	-1		lncRNA	1881
chr3	193600000	194360000	chr3	193841868	193844024	ENSG00000229155	2	-1	LINC02038	lncRNA	2156
chr3	193600000	194360000	chr3	194130616	194131201	ENSG00000232874	1	-1	LINC02924	lncRNA	585
chr3	193600000	194360000	chr3	194135219	194135845	ENSG00000289385	1	1		lncRNA	626
chr3	193600000	194360000	chr3	194300329	194302048	ENSG00000286317	1	1		lncRNA	1719
chr3	193600000	194360000	chr3	193618609	193627337	ENSG00000224855	5	-1	OPA1-AS1	lncRNA	8728
chr3	193600000	194360000	chr3	193771874	193782758	ENSG00000287206	1	1		lncRNA	10884
chr3	193600000	194360000	chr3	194070103	194086826	ENSG00000276407	5	1		lncRNA	16723
chr3	193600000	194360000	chr3	194091561	194109174	ENSG00000229964	1	1		lncRNA	17613
chr3	193600000	194360000	chr3	194005259	194071025	ENSG00000230102	8	-1	LINC02028	lncRNA	65766
chr3	193600000	194360000	chr3	194276682	194287368	ENSG00000228271	2	1	LINC02048	lncRNA	10686
chr3	193600000	194360000	chr3	194296191	194322871	ENSG00000214145	8	-1	LINC00887	lncRNA	26680
chr3	193600000	194360000	chr3	194202392	194250203	ENSG00000225742	6	-1	LINC02036	lncRNA	47811
chr3	193600000	194360000	chr3	194247617	194260720	ENSG00000238097	3	1	LINC02037	lncRNA	13103
chr3	193600000	194360000	chr3	193957372	194003760	ENSG00000214146	3	-1	LINC02026	lncRNA	46388
chr3	193600000	194360000	chr3	193980614	194006098	ENSG00000238043	1	1		lncRNA	25484
chr4	7120000	9160000	chr4	7939001	7940296	ENSG00000228919	5	1		lncRNA	1295
chr4	7120000	9160000	chr4	8022665	8023126	ENSG00000273267	1	1		lncRNA	461
chr4	7120000	9160000	chr4	8066528	8067724	ENSG00000251460	1	1		lncRNA	1196
chr4	7120000	9160000	chr4	8745391	8747727	ENSG00000250915	3	-1		lncRNA	2336
chr4	7120000	9160000	chr4	8858715	8860827	ENSG00000258507	1	-1		lncRNA	2112
chr4	7120000	9160000	chr4	9076949	9092530	ENSG00000287972	1	1		lncRNA	15581
chr4	7120000	9160000	chr4	7754077	7778928	ENSG00000272620	2	1	AFAP1-AS1	lncRNA	24851
chr4	7120000	9160000	chr4	7798527	7808051	ENSG00000287164	1	1		lncRNA	9524
chr4	7120000	9160000	chr4	8159049	8160131	ENSG00000290015	1	1		lncRNA	1082
chr4	7120000	9160000	chr4	8320105	8327165	ENSG00000249145	5	1	LINC02517	lncRNA	7060
chr4	7120000	9160000	chr4	8355090	8358338	ENSG00000251615	3	-1		lncRNA	3248
chr4	7120000	9160000	chr4	8482270	8516759	ENSG00000205959	4	1		lncRNA	34489
chr4	7120000	9160000	chr4	8453410	8454942	ENSG00000251186	1	-1		lncRNA	1532
chr4	7120000	9160000	chr4	9034519	9381269	ENSG00000288075	1	-1		lncRNA	125481
chr4	10560000	12720000	chr4	10685003	10697661	ENSG00000249334	1	1		lncRNA	12658
chr4	10560000	12720000	chr4	11469250	11478196	ENSG00000251152	1	1		lncRNA	8946
chr4	10560000	12720000	chr4	11914667	11919688	ENSG00000248262	1	1		lncRNA	5021
chr4	10560000	12720000	chr4	11426874	11467802	ENSG00000287778	2	1		lncRNA	40928
chr4	10560000	12720000	chr4	11740948	11769468	ENSG00000248300	1	-1	LINC02360	lncRNA	28520
chr4	10560000	12720000	chr4	12223445	12251286	ENSG00000251210	6	1	LINC02270	lncRNA	27841
chr4	10560000	12720000	chr4	10737558	10749586	ENSG00000283083	2	1	LINC02498	lncRNA	12028
chr4	10560000	12720000	chr4	11625651	11823906	ENSG00000249631	7	1		lncRNA	198255
chr4	21760000	22760000	chr4	21843341	21853188	ENSG00000280650	1	-1	KCNIP4-IT1	lncRNA	9847
chr4	21760000	22760000	chr4	22237413	22317359	ENSG00000289849	1	1		lncRNA	79946
chr4	21760000	22760000	chr4	21949015	22330330	ENSG00000250039	4	1		lncRNA	381315
chr4	26440000	27040000	chr4	26859806	26860650	ENSG00000240005	7	-1	STIM2-AS1	lncRNA	844
chr4	30280000	32840000	chr4	30717369	30718929	ENSG00000288940	1	1		lncRNA	1560
chr4	30280000	32840000	chr4	31350284	31351725	ENSG00000251434	1	1		lncRNA	1441
chr4	30280000	32840000	chr4	32351038	32353220	ENSG00000251329	1	1	LINC02353	lncRNA	2182
chr4	30280000	32840000	chr4	30718805	30721970	ENSG00000286596	1	-1		lncRNA	3165
chr4	30280000	32840000	chr4	30776257	30793970	ENSG00000249678	1	-1		lncRNA	17713
chr4	30280000	32840000	chr4	31506422	31558831	ENSG00000249882	2	1	LINC02501	lncRNA	52409
chr4	30280000	32840000	chr4	32005076	32022483	ENSG00000286212	2	-1		lncRNA	17407
chr4	30280000	32840000	chr4	31171013	31211678	ENSG00000251182	2	1	LINC02497	lncRNA	40665
chr4	30280000	32840000	chr4	31997376	32228543	ENSG00000251129	3	1	LINC02506	lncRNA	231167
chr4	30280000	32840000	chr4	32583855	32745525	ENSG00000286784	1	-1		lncRNA	161670
chr4	38040000	38760000	chr4	38276178	38279880	ENSG00000287659	1	-1		lncRNA	3702
chr4	38040000	38760000	chr4	38286994	38287491	ENSG00000251642	1	1		lncRNA	497
chr4	38040000	38760000	chr4	38509729	38518056	ENSG00000249667	2	1	LINC01259	lncRNA	8327
chr4	38040000	38760000	chr4	38618265	38619437	ENSG00000271958	1	-1		lncRNA	1172
chr4	38040000	38760000	chr4	38366914	38385759	ENSG00000248227	1	1	LINC02513	lncRNA	18845
chr4	38040000	38760000	chr4	38420662	38523180	ENSG00000249534	2	-1	LINC01258	lncRNA	102518
chr4	38040000	38760000	chr4	38564003	38572022	ENSG00000251635	2	1	LINC02278	lncRNA	8019
chr4	38040000	38760000	chr4	38602438	38664926	ENSG00000231160	12	-1	KLF3-AS1	lncRNA	62488
chr4	40040000	40760000	chr4	40166675	40167831	ENSG00000260296	1	1		lncRNA	1156
chr4	40040000	40760000	chr4	40265472	40266457	ENSG00000250338	1	1		lncRNA	985
chr4	40040000	40760000	chr4	40426119	40427585	ENSG00000250893	1	1		lncRNA	1466
chr4	40040000	40760000	chr4	40187170	40190464	ENSG00000286089	1	1		lncRNA	3294
chr4	40040000	40760000	chr4	40316484	40330422	ENSG00000249241	2	1	LINC02265	lncRNA	13938
chr4	40040000	40760000	chr4	40743627	40750865	ENSG00000287182	1	-1		lncRNA	7238
chr4	40920000	41240000	chr4	41220074	41256727	ENSG00000251173	1	-1	UCHL1-DT	lncRNA	19926
chr4	74160000	74680000	chr4	74418917	74440457	ENSG00000250532	1	-1		lncRNA	21540
chr4	74160000	74680000	chr4	74552584	74589481	ENSG00000249942	1	-1		lncRNA	36897
chr4	76120000	77720000	chr4	76305887	76306591	ENSG00000289515	2	-1		lncRNA	704
chr4	76120000	77720000	chr4	77048964	77050852	ENSG00000289443	1	1		lncRNA	1888
chr4	76120000	77720000	chr4	77056585	77057629	ENSG00000288888	1	1		lncRNA	1044
chr4	76120000	77720000	chr4	77076049	77077325	ENSG00000289496	2	1		lncRNA	1276
chr4	76120000	77720000	chr4	76758554	76801964	ENSG00000224218	1	-1		lncRNA	43410
chr4	76120000	77720000	chr4	76708853	76802426	ENSG00000233860	2	-1	SHROOM3-AS1	lncRNA	93573
chr4	76120000	77720000	chr4	76148561	76200666	ENSG00000286074	1	1		lncRNA	52105
chr4	76120000	77720000	chr4	76240740	76312098	ENSG00000287401	1	-1		lncRNA	71358
chr4	76120000	77720000	chr4	77394491	77494286	ENSG00000249036	1	-1		lncRNA	99795
chr4	76120000	77720000	chr4	76908814	76949639	ENSG00000289586	2	-1		lncRNA	40825
chr4	77920000	78920000	chr4	78669690	78691671	ENSG00000287632	1	-1		lncRNA	21981
chr4	77920000	78920000	chr4	78773654	78775973	ENSG00000260278	1	-1	BMP2K-DT	lncRNA	2319
chr4	77920000	78920000	chr4	78638780	78683185	ENSG00000251442	8	1	LINC01094	lncRNA	44405
chr4	78920000	80240000	chr4	79587302	79588091	ENSG00000290776	1	-1		lncRNA	789
chr4	78920000	80240000	chr4	79596542	79597173	ENSG00000251399	1	1		lncRNA	631
chr4	78920000	80240000	chr4	79827471	79877770	ENSG00000251321	1	1	PCAT4	lncRNA	50299
chr4	78920000	80240000	chr4	80182637	80197410	ENSG00000248719	2	-1	PRDM8-AS1	lncRNA	14773
chr4	78920000	80240000	chr4	78939485	79309673	ENSG00000249307	8	1	LINC01088	lncRNA	370188
chr4	78920000	80240000	chr4	79491802	79623479	ENSG00000250334	8	1	LINC00989	lncRNA	131677
chr4	78920000	80240000	chr4	79663761	79696837	ENSG00000248408	1	1	LINC02469	lncRNA	33076
chr4	94280000	94600000	chr4	94315486	94343041	ENSG00000287552	1	1		lncRNA	27555
chr4	95120000	96360000	chr4	95549129	95552457	ENSG00000271474	1	1	UNC5C-AS1	lncRNA	3328
chr4	95120000	96360000	chr4	96310701	96818864	ENSG00000248510	2	1	LINC02267	lncRNA	49299
chr4	96400000	98080000	chr4	96841995	96857900	ENSG00000287841	1	1		lncRNA	15905
chr4	96400000	98080000	chr4	97120701	97135059	ENSG00000253170	1	1		lncRNA	14358
chr4	96400000	98080000	chr4	97366681	97491899	ENSG00000251620	3	1	STPG2-AS1	lncRNA	125218
chr4	96400000	98080000	chr4	97334635	97633823	ENSG00000254044	5	-1		lncRNA	299188
chr4	96400000	98080000	chr4	96310701	96818864	ENSG00000248510	2	1	LINC02267	lncRNA	418864
chr4	98080000	99080000	chr4	98259390	98261215	ENSG00000289532	2	-1		lncRNA	1825
chr4	98080000	99080000	chr4	98961083	98964790	ENSG00000287512	1	1		lncRNA	3707
chr4	98080000	99080000	chr4	99067256	99068125	ENSG00000272777	1	-1		lncRNA	869
chr4	98080000	99080000	chr4	98251688	98261630	ENSG00000214559	3	-1		lncRNA	9942
chr4	98080000	99080000	chr4	98496364	98509935	ENSG00000251523	1	1		lncRNA	13571
chr4	98080000	99080000	chr4	98658894	98664550	ENSG00000260641	2	1	TSPAN5-DT	lncRNA	5656
chr4	98080000	99080000	chr4	98928897	98994994	ENSG00000263923	1	1		lncRNA	66097
chr4	99960000	102320000	chr4	100778582	100791426	ENSG00000251219	2	-1	LINC01217	lncRNA	12844
chr4	99960000	102320000	chr4	100812255	100814280	ENSG00000251636	1	-1	LINC01218	lncRNA	2025
chr4	99960000	102320000	chr4	101347752	101349436	ENSG00000254531	3	1	FLJ20021	lncRNA	1684
chr4	99960000	102320000	chr4	100190033	100215505	ENSG00000249710	1	1	DDIT4L-AS1	lncRNA	25472
chr4	99960000	102320000	chr4	100421655	100474461	ENSG00000286150	1	1		lncRNA	52806
chr4	99960000	102320000	chr4	101640946	101649974	ENSG00000286124	1	-1		lncRNA	9028
chr4	99960000	102320000	chr4	101976894	102036903	ENSG00000251309	1	-1		lncRNA	60009
chr4	99960000	102320000	chr4	99950006	100195099	ENSG00000245322	8	1	H2AZ1-DT	lncRNA	235099
chr4	99960000	102320000	chr4	100660279	100675113	ENSG00000250223	1	-1	LINC01216	lncRNA	14834
chr4	113120000	114400000	chr4	113943256	113944320	ENSG00000249304	1	1		lncRNA	1064
chr4	113120000	114400000	chr4	114281113	114364978	ENSG00000288781	2	-1		lncRNA	83865
chr4	125280000	127600000	chr4	126064128	126073370	ENSG00000251649	2	1	LINC02379	lncRNA	9242
chr4	125280000	127600000	chr4	126776969	126778414	ENSG00000289869	1	-1		lncRNA	1445
chr4	125280000	127600000	chr4	127043430	127077762	ENSG00000250945	1	-1		lncRNA	34332
chr4	125280000	127600000	chr4	126431694	126735523	ENSG00000286251	2	-1		lncRNA	303829
chr4	125280000	127600000	chr4	127228519	127352379	ENSG00000287101	1	-1		lncRNA	123860
chr4	125280000	127600000	chr4	127094410	127470569	ENSG00000248491	6	-1		lncRNA	376159
chr4	125280000	127600000	chr4	127532828	127623803	ENSG00000287021	1	-1		lncRNA	67172
chr4	125280000	127600000	chr4	125676718	126017357	ENSG00000250149	2	1		lncRNA	340639
chr4	139000000	140360000	chr4	139556799	139557643	ENSG00000272717	1	1		lncRNA	844
chr4	139000000	140360000	chr4	139763053	139770391	ENSG00000286320	2	1		lncRNA	7338
chr4	139000000	140360000	chr4	139841168	139841542	ENSG00000290022	1	-1		lncRNA	374
chr4	139000000	140360000	chr4	139411927	139454034	ENSG00000273247	7	-1	RAB33B-AS1	lncRNA	42107
chr4	139000000	140360000	chr4	140128015	140134565	ENSG00000250698	1	1		lncRNA	6550
chr4	139000000	140360000	chr4	140283724	140373409	ENSG00000196951	13	-1	SCOC-AS1	lncRNA	76276
chr4	139000000	140360000	chr4	138819954	139012646	ENSG00000250195	1	-1		lncRNA	12646
chr4	139000000	140360000	chr4	139177456	139245432	ENSG00000288785	1	1		lncRNA	67976
chr4	139000000	140360000	chr4	139564298	139623257	ENSG00000261268	2	-1	QKILA	lncRNA	58959
chr4	139000000	140360000	chr4	139559283	139618133	ENSG00000286896	2	1		lncRNA	58850
chr4	166120000	168160000	chr4	167306910	167308789	ENSG00000250150	1	-1		lncRNA	1879
chr4	166120000	168160000	chr4	166388701	166526119	ENSG00000249675	1	-1		lncRNA	137418
chr4	166120000	168160000	chr4	167946674	168113331	ENSG00000248601	1	-1		lncRNA	166657
chr4	168160000	168920000	chr4	168647896	168648587	ENSG00000249623	1	-1	PALLD-AS1	lncRNA	691
chr4	168160000	168920000	chr4	168828919	168832937	ENSG00000249609	1	-1		lncRNA	4018
chr4	168160000	168920000	chr4	168170097	168194861	ENSG00000287188	1	-1		lncRNA	24764
chr4	169000000	169600000	chr4	169010430	169010939	ENSG00000251445	1	1	CBR4-DT	lncRNA	509
chr4	169000000	169600000	chr4	169572328	169576451	ENSG00000286302	1	1		lncRNA	4123
chr4	169000000	169600000	chr4	169201794	169220349	ENSG00000251171	1	1		lncRNA	18555
chr4	169000000	169600000	chr4	169344508	169345397	ENSG00000289249	2	-1		lncRNA	889
chr4	184720000	186200000	chr4	184813619	184821300	ENSG00000251139	2	1		lncRNA	7681
chr4	184720000	186200000	chr4	184859719	184860183	ENSG00000289139	1	-1		lncRNA	464
chr4	184720000	186200000	chr4	185587909	185594003	ENSG00000233110	1	1	SORBS2-AS1	lncRNA	6094
chr4	184720000	186200000	chr4	185665885	185675417	ENSG00000235902	1	1		lncRNA	9532
chr4	184720000	186200000	chr4	185918140	185919460	ENSG00000235149	1	1		lncRNA	1320
chr4	184720000	186200000	chr4	184826607	184850920	ENSG00000286256	2	1		lncRNA	24313
chr4	184720000	186200000	chr4	184843296	184855751	ENSG00000251230	7	-1	MIR3945HG	lncRNA	12455
chr4	184720000	186200000	chr4	184892858	184899553	ENSG00000249173	8	-1	LINC01093	lncRNA	6695
chr4	184720000	186200000	chr4	184988997	185005186	ENSG00000248517	1	1	LINC02437	lncRNA	16189
chr4	184720000	186200000	chr4	185118984	185127478	ENSG00000287183	1	-1		lncRNA	8494
chr4	184720000	186200000	chr4	185370725	185390928	ENSG00000250410	1	1	LRP2BP-AS1	lncRNA	20203
chr4	184720000	186200000	chr4	185471415	185507055	ENSG00000249679	3	1		lncRNA	35640
chr4	184720000	186200000	chr4	185051081	185115500	ENSG00000250754	6	1	LINC02436	lncRNA	64419
chr4	184720000	186200000	chr4	184894400	184973585	ENSG00000289197	2	1		lncRNA	79185
chr4	186200000	190214555	chr4	186701579	186704086	ENSG00000287169	1	1		lncRNA	2507
chr4	186200000	190214555	chr4	186892552	186892983	ENSG00000272218	1	1		lncRNA	431
chr4	186200000	190214555	chr4	187198218	187201894	ENSG00000287571	1	-1		lncRNA	3676
chr4	186200000	190214555	chr4	187304083	187309682	ENSG00000250658	1	-1		lncRNA	5599
chr4	186200000	190214555	chr4	187370648	187371921	ENSG00000250042	1	1	LINC02514	lncRNA	1273
chr4	186200000	190214555	chr4	187408232	187415748	ENSG00000250620	2	1	LINC02515	lncRNA	7516
chr4	186200000	190214555	chr4	187516153	187517208	ENSG00000251490	1	-1		lncRNA	1055
chr4	186200000	190214555	chr4	188140822	188143379	ENSG00000247130	2	-1		lncRNA	2557
chr4	186200000	190214555	chr4	188159705	188161157	ENSG00000248370	2	1	LINC02434	lncRNA	1452
chr4	186200000	190214555	chr4	188776657	188785511	ENSG00000251619	1	1	LINC02508	lncRNA	8854
chr4	186200000	190214555	chr4	188990715	189002075	ENSG00000250024	1	-1		lncRNA	11360
chr4	186200000	190214555	chr4	189288677	189291336	ENSG00000249877	1	-1		lncRNA	2659
chr4	186200000	190214555	chr4	189703881	189704490	ENSG00000272566	1	-1		lncRNA	609
chr4	186200000	190214555	chr4	189881515	189884868	ENSG00000250666	1	1	LINC01596	lncRNA	3353
chr4	186200000	190214555	chr4	190064502	190067864	ENSG00000281591	1	1	DBET	lncRNA	3362
chr4	186200000	190214555	chr4	186326302	186336662	ENSG00000287667	1	1		lncRNA	10360
chr4	186200000	190214555	chr4	186890969	186892366	ENSG00000250829	2	1		lncRNA	1397
chr4	186200000	190214555	chr4	186979490	187027451	ENSG00000249742	2	-1		lncRNA	47961
chr4	186200000	190214555	chr4	187201986	187209346	ENSG00000249747	1	1	LINC02374	lncRNA	7360
chr4	186200000	190214555	chr4	188434552	188455537	ENSG00000289879	1	-1		lncRNA	20985
chr4	186200000	190214555	chr4	188777672	188818522	ENSG00000250626	3	-1		lncRNA	40850
chr4	186200000	190214555	chr4	188757678	188779343	ENSG00000249269	2	1		lncRNA	21665
chr4	186200000	190214555	chr4	189193100	189204877	ENSG00000251310	1	1		lncRNA	11777
chr4	186200000	190214555	chr4	186286094	186500997	ENSG00000251165	6	-1	F11-AS1	lncRNA	214903
chr4	186200000	190214555	chr4	187532873	187672755	ENSG00000250590	6	-1	LINC02492	lncRNA	139882
chr4	186200000	190214555	chr4	187005944	187060930	ENSG00000250971	3	1		lncRNA	54986
chr4	186200000	190214555	chr4	187942164	187963345	ENSG00000286641	1	-1		lncRNA	21181
chr4	186200000	190214555	chr4	188400736	188681051	ENSG00000249378	8	1	LINC01060	lncRNA	280315
chr4	186200000	190214555	chr4	189659605	189661486	ENSG00000250739	1	1	LINC01262	lncRNA	1881
chr4	186200000	190214555	chr4	187613708	187712329	ENSG00000249642	2	1		lncRNA	98621
chr4	186200000	190214555	chr4	189764391	189940733	ENSG00000245685	9	-1	FRG1-DT	lncRNA	176342
chr5	0	1640000	chr5	195778	196341	ENSG00000261434	1	1		lncRNA	563
chr5	0	1640000	chr5	213898	217279	ENSG00000260774	1	-1		lncRNA	3381
chr5	0	1640000	chr5	269295	271516	ENSG00000248925	3	-1	PDCD6-DT	lncRNA	2221
chr5	0	1640000	chr5	466124	473098	ENSG00000188242	4	-1	PP7080	lncRNA	6974
chr5	0	1640000	chr5	675826	676616	ENSG00000271781	1	1		lncRNA	790
chr5	0	1640000	chr5	693493	694831	ENSG00000289088	1	1		lncRNA	1338
chr5	0	1640000	chr5	784825	786286	ENSG00000288930	1	1		lncRNA	1461
chr5	0	1640000	chr5	904319	912587	ENSG00000287600	1	-1		lncRNA	8268
chr5	0	1640000	chr5	962318	964131	ENSG00000288763	1	-1		lncRNA	1813
chr5	0	1640000	chr5	979365	981300	ENSG00000250173	1	1		lncRNA	1935
chr5	0	1640000	chr5	987180	997342	ENSG00000215246	6	-1	LINC02982	lncRNA	10162
chr5	0	1640000	chr5	1005039	1006623	ENSG00000272347	1	1		lncRNA	1584
chr5	0	1640000	chr5	1173141	1178605	ENSG00000249201	2	-1	TERLR1	lncRNA	5464
chr5	0	1640000	chr5	1252006	1255976	ENSG00000287486	1	1		lncRNA	3970
chr5	0	1640000	chr5	1345197	1350786	ENSG00000286388	1	1		lncRNA	5589
chr5	0	1640000	chr5	1544107	1551710	ENSG00000251532	1	-1		lncRNA	7603
chr5	0	1640000	chr5	1639627	1644700	ENSG00000288549	1	-1		lncRNA	373
chr5	0	1640000	chr5	473236	480884	ENSG00000225138	8	1	SLC9A3-AS1	lncRNA	7648
chr5	0	1640000	chr5	441498	443160	ENSG00000221990	5	-1	EXOC3-AS1	lncRNA	1662
chr5	0	1640000	chr5	602620	612210	ENSG00000249650	1	-1	CEP72-DT	lncRNA	9590
chr5	0	1640000	chr5	946315	956520	ENSG00000248949	1	1		lncRNA	10205
chr5	0	1640000	chr5	1353896	1380107	ENSG00000250584	4	-1	LINC01511	lncRNA	26211
chr5	0	1640000	chr5	1594626	1611467	ENSG00000271119	1	1	LINC03067	lncRNA	16841
chr5	0	1640000	chr5	1598920	1634014	ENSG00000291079	1	-1		lncRNA	35094
chr5	0	1640000	chr5	524109	527448	ENSG00000250385	2	1		lncRNA	3339
chr5	0	1640000	chr5	1567495	1594651	ENSG00000291055	1	-1		lncRNA	27156
chr5	1680000	2200000	chr5	1725149	1728172	ENSG00000260066	1	1		lncRNA	3023
chr5	1680000	2200000	chr5	1855970	1856568	ENSG00000250417	1	-1	LINC02116	lncRNA	598
chr5	1680000	2200000	chr5	1887332	1900493	ENSG00000249326	1	1	CTD-2194D22.4	lncRNA	13161
chr5	1680000	2200000	chr5	1968094	1969013	ENSG00000249731	1	1		lncRNA	919
chr5	1680000	2200000	chr5	1850950	1851497	ENSG00000249966	1	1		lncRNA	547
chr5	1680000	2200000	chr5	1931058	1933985	ENSG00000288108	1	-1		lncRNA	2927
chr5	1680000	2200000	chr5	1883315	1884758	ENSG00000249116	2	1	IRX4-AS1	lncRNA	1443
chr5	1680000	2200000	chr5	1963346	1967251	ENSG00000248597	2	-1		lncRNA	3905
chr5	1680000	2200000	chr5	1931064	2119926	ENSG00000248994	2	1		lncRNA	188862
chr5	44840000	46440000	chr5	45226286	45228428	ENSG00000287540	1	1		lncRNA	2142
chr5	44840000	46440000	chr5	45890216	45895970	ENSG00000250122	1	1		lncRNA	5754
chr5	44840000	46440000	chr5	45035199	45098647	ENSG00000248148	1	1		lncRNA	63448
chr5	52760000	54240000	chr5	53089016	53089468	ENSG00000272123	1	-1		lncRNA	452
chr5	52760000	54240000	chr5	53880293	53881051	ENSG00000272416	1	-1		lncRNA	758
chr5	52760000	54240000	chr5	53897464	53899370	ENSG00000287087	1	1		lncRNA	1906
chr5	52760000	54240000	chr5	52853183	52872925	ENSG00000288539	1	-1		lncRNA	19742
chr5	52760000	54240000	chr5	53024924	53035884	ENSG00000286048	1	-1		lncRNA	10960
chr5	52760000	54240000	chr5	53109816	53127673	ENSG00000247796	3	1	MOCS2-DT	lncRNA	17857
chr5	52760000	54240000	chr5	53297872	53326565	ENSG00000285831	1	-1		lncRNA	28693
chr5	52760000	54240000	chr5	53776048	53819722	ENSG00000250447	6	-1	LINC02105	lncRNA	43674
chr5	52760000	54240000	chr5	52930606	52990278	ENSG00000249899	6	-1	ITGA2-AS1	lncRNA	59672
chr5	52760000	54240000	chr5	52673186	52799987	ENSG00000248898	4	-1	PELO-AS1	lncRNA	39987
chr5	57280000	58480000	chr5	57751192	57751717	ENSG00000249198	1	-1		lncRNA	525
chr5	57280000	58480000	chr5	57890327	57899162	ENSG00000249584	1	-1	LINC02225	lncRNA	8835
chr5	57280000	58480000	chr5	57574027	57619816	ENSG00000249436	2	1	LNCBRM	lncRNA	45789
chr5	57280000	58480000	chr5	58114598	58145996	ENSG00000286853	1	1		lncRNA	31398
chr5	57280000	58480000	chr5	58107631	58122375	ENSG00000248132	3	-1	LINC02101	lncRNA	14744
chr5	57280000	58480000	chr5	57395060	57534504	ENSG00000250961	2	1	RMEL3	lncRNA	139444
chr5	57280000	58480000	chr5	57650632	57750255	ENSG00000287709	3	1		lncRNA	99623
chr5	71360000	72320000	chr5	71372676	71374898	ENSG00000253985	1	-1		lncRNA	2222
chr5	71360000	72320000	chr5	71445616	71446569	ENSG00000249981	1	1		lncRNA	953
chr5	71360000	72320000	chr5	71375786	71385993	ENSG00000290836	1	1	PMCHL2	lncRNA	10207
chr5	71360000	72320000	chr5	72087782	72108000	ENSG00000285804	2	-1		lncRNA	20218
chr5	71360000	72320000	chr5	71337182	71446772	ENSG00000250387	3	-1	LINC02197	lncRNA	86772
chr5	79520000	80680000	chr5	79840797	79846449	ENSG00000286818	2	1		lncRNA	5652
chr5	79520000	80680000	chr5	80256200	80258040	ENSG00000288741	1	1		lncRNA	1840
chr5	79520000	80680000	chr5	80407323	80407925	ENSG00000289317	2	-1		lncRNA	602
chr5	79520000	80680000	chr5	80630313	80631590	ENSG00000249655	1	-1		lncRNA	1277
chr5	79520000	80680000	chr5	79543786	79547655	ENSG00000288846	1	-1		lncRNA	3869
chr5	79520000	80680000	chr5	79774348	79816190	ENSG00000250258	1	-1		lncRNA	41842
chr5	79520000	80680000	chr5	80052374	80083654	ENSG00000249825	6	-1	THBS4-AS1	lncRNA	31280
chr5	79520000	80680000	chr5	80128361	80143883	ENSG00000251675	1	1		lncRNA	15522
chr5	79520000	80680000	chr5	80411231	80488095	ENSG00000249042	6	-1	FAM151B-DT	lncRNA	76864
chr5	79520000	80680000	chr5	80608623	80622524	ENSG00000251221	1	-1	LINC01337	lncRNA	13901
chr5	79520000	80680000	chr5	79936579	79967626	ENSG00000250888	1	1	LINC01455	lncRNA	31047
chr5	82280000	83640000	chr5	82545862	82546310	ENSG00000248393	1	-1		lncRNA	448
chr5	82280000	83640000	chr5	82586776	82587411	ENSG00000248870	1	-1		lncRNA	635
chr5	82280000	83640000	chr5	82765404	82766333	ENSG00000249100	1	1		lncRNA	929
chr5	82280000	83640000	chr5	82940458	82940983	ENSG00000249857	1	-1		lncRNA	525
chr5	82280000	83640000	chr5	83012285	83013109	ENSG00000249664	1	-1		lncRNA	824
chr5	82280000	83640000	chr5	82919376	82921119	ENSG00000248112	1	-1		lncRNA	1743
chr5	82280000	83640000	chr5	83049376	83050964	ENSG00000271862	1	-1		lncRNA	1588
chr5	82280000	83640000	chr5	83531352	83581320	ENSG00000249835	2	-1	VCAN-AS1	lncRNA	49968
chr5	82280000	83640000	chr5	82807475	82860008	ENSG00000281327	4	-1	LINC01338	lncRNA	52533
chr5	90840000	91440000	chr5	91132303	91142470	ENSG00000285618	1	-1		lncRNA	10167
chr5	90840000	91440000	chr5	91223419	91223967	ENSG00000212930	3	1		lncRNA	548
chr5	90840000	91440000	chr5	91226475	91227071	ENSG00000251093	1	-1		lncRNA	596
chr5	90840000	91440000	chr5	91280097	91281142	ENSG00000234292	3	-1		lncRNA	1045
chr5	90840000	91440000	chr5	91280229	91282713	ENSG00000286638	2	1		lncRNA	2484
chr5	90840000	91440000	chr5	91355380	91356026	ENSG00000241059	2	1		lncRNA	646
chr5	90840000	91440000	chr5	91380349	91616105	ENSG00000281357	5	1	ARRDC3-AS1	lncRNA	59651
chr5	90840000	91440000	chr5	91054834	91314547	ENSG00000248323	8	-1	LUCAT1	lncRNA	259713
chr5	91440000	94920000	chr5	93088856	93091768	ENSG00000286509	1	1		lncRNA	2912
chr5	91440000	94920000	chr5	93598593	93600214	ENSG00000289274	1	1		lncRNA	1621
chr5	91440000	94920000	chr5	93741640	93743500	ENSG00000272406	1	1		lncRNA	1860
chr5	91440000	94920000	chr5	93860669	93863825	ENSG00000251023	1	-1		lncRNA	3156
chr5	91440000	94920000	chr5	94788789	94793599	ENSG00000249175	1	1		lncRNA	4810
chr5	91440000	94920000	chr5	92675956	92688254	ENSG00000249984	1	-1		lncRNA	12298
chr5	91440000	94920000	chr5	92823935	92844992	ENSG00000248588	2	1		lncRNA	21057
chr5	91440000	94920000	chr5	93621683	93675081	ENSG00000287180	1	1		lncRNA	53398
chr5	91440000	94920000	chr5	93790505	93801320	ENSG00000287447	1	1		lncRNA	10815
chr5	91440000	94920000	chr5	94111720	94176029	ENSG00000286577	1	1		lncRNA	64309
chr5	91440000	94920000	chr5	94611906	94618122	ENSG00000270133	1	-1		lncRNA	6216
chr5	91440000	94920000	chr5	91642643	91799234	ENSG00000286121	1	1		lncRNA	156591
chr5	91440000	94920000	chr5	91380349	91616105	ENSG00000281357	5	1	ARRDC3-AS1	lncRNA	176105
chr5	91440000	94920000	chr5	92410256	92660863	ENSG00000249776	5	-1		lncRNA	250607
chr5	91440000	94920000	chr5	92654848	92679141	ENSG00000249169	1	1		lncRNA	24293
chr5	91440000	94920000	chr5	92907180	92939591	ENSG00000248528	1	-1	LINC02058	lncRNA	32411
chr5	91440000	94920000	chr5	93019663	93068669	ENSG00000251361	1	-1		lncRNA	49006
chr5	91440000	94920000	chr5	93360779	93585649	ENSG00000237187	9	-1	NR2F1-AS1	lncRNA	224870
chr5	91440000	94920000	chr5	92082597	92479426	ENSG00000250049	7	1		lncRNA	396829
chr5	102560000	103520000	chr5	102605635	102606197	ENSG00000247402	2	1		lncRNA	562
chr5	102560000	103520000	chr5	103408941	103412511	ENSG00000250567	1	-1		lncRNA	3570
chr5	102560000	103520000	chr5	102581368	102617589	ENSG00000250958	1	1	LINC00492	lncRNA	36221
chr5	102560000	103520000	chr5	102664610	102726598	ENSG00000286338	1	1		lncRNA	61988
chr5	102560000	103520000	chr5	103246048	103253519	ENSG00000248203	1	-1		lncRNA	7471
chr5	102560000	103520000	chr5	102604220	102671765	ENSG00000250682	6	-1	LINC00491	lncRNA	67545
chr5	108400000	110720000	chr5	108727866	108728874	ENSG00000289260	2	1		lncRNA	1008
chr5	108400000	110720000	chr5	108725707	108728322	ENSG00000272523	2	-1	LINC01023	lncRNA	2615
chr5	108400000	110720000	chr5	109470843	109471586	ENSG00000248876	1	1		lncRNA	743
chr5	108400000	110720000	chr5	109467353	109467952	ENSG00000251367	1	1		lncRNA	599
chr5	108400000	110720000	chr5	109497877	109499108	ENSG00000248440	1	1		lncRNA	1231
chr5	108400000	110720000	chr5	109687802	109688329	ENSG00000271849	1	-1	MAN2A1-DT	lncRNA	527
chr5	108400000	110720000	chr5	109883182	109884751	ENSG00000254106	1	1	LINC01848	lncRNA	1569
chr5	108400000	110720000	chr5	108818041	108830790	ENSG00000250383	1	-1		lncRNA	12749
chr5	108400000	110720000	chr5	108382156	108418016	ENSG00000286503	1	1		lncRNA	18016
chr5	108400000	110720000	chr5	109165289	109187152	ENSG00000286882	1	-1		lncRNA	21863
chr5	108400000	110720000	chr5	109237120	109326369	ENSG00000249476	2	-1		lncRNA	89249
chr5	112960000	113600000	chr5	113323028	113437174	ENSG00000232633	4	1		lncRNA	114146
chr5	115600000	116120000	chr5	115691462	115692167	ENSG00000249021	1	-1		lncRNA	705
chr5	115600000	116120000	chr5	115956571	115958599	ENSG00000287148	1	1	LINCADL	lncRNA	2028
chr5	115600000	116120000	chr5	116078110	116078570	ENSG00000272265	1	-1		lncRNA	460
chr5	115600000	116120000	chr5	116083807	116085444	ENSG00000271918	2	-1		lncRNA	1637
chr5	115600000	116120000	chr5	115738978	115756543	ENSG00000248709	3	1		lncRNA	17565
chr5	115600000	116120000	chr5	115602057	115623897	ENSG00000249249	2	1	TICAM2-AS1	lncRNA	21840
chr5	140720000	141600000	chr5	140849105	140849696	ENSG00000278907	1	-1		lncRNA	591
chr5	140720000	141600000	chr5	140867513	140867959	ENSG00000278946	1	-1		lncRNA	446
chr5	140720000	141600000	chr5	140875346	140875922	ENSG00000278915	1	-1		lncRNA	576
chr5	140720000	141600000	chr5	140878073	140882642	ENSG00000278901	1	-1		lncRNA	4569
chr5	140720000	141600000	chr5	140966212	140966490	ENSG00000279028	1	-1		lncRNA	278
chr5	140720000	141600000	chr5	141039993	141040905	ENSG00000288892	1	-1		lncRNA	912
chr5	140720000	141600000	chr5	141118680	141120765	ENSG00000272108	1	1		lncRNA	2085
chr5	140720000	141600000	chr5	141155996	141159061	ENSG00000290893	1	1		lncRNA	3065
chr5	140720000	141600000	chr5	141168231	141168893	ENSG00000280336	1	1		lncRNA	662
chr5	140720000	141600000	chr5	141182409	141188582	ENSG00000279068	1	1		lncRNA	6173
chr5	140720000	141600000	chr5	141191599	141194088	ENSG00000279375	1	-1		lncRNA	2489
chr5	140720000	141600000	chr5	141234333	141237529	ENSG00000290894	1	1	PCDHB18P	lncRNA	3196
chr5	140720000	141600000	chr5	141240121	141243034	ENSG00000290895	1	1		lncRNA	2913
chr5	140720000	141600000	chr5	141320910	141325985	ENSG00000288095	2	1		lncRNA	5075
chr5	140720000	141600000	chr5	141350109	141350662	ENSG00000280026	1	-1		lncRNA	553
chr5	140720000	141600000	chr5	141427295	141427752	ENSG00000279855	1	-1		lncRNA	457
chr5	140720000	141600000	chr5	141468465	141471528	ENSG00000273557	1	1		lncRNA	3063
chr5	140720000	141600000	chr5	141558311	141565263	ENSG00000246422	2	1	DIAPH1-AS1	lncRNA	6952
chr5	140720000	141600000	chr5	140711215	140733281	ENSG00000292256	1	1		lncRNA	13281
chr5	140720000	141600000	chr5	140785698	140828549	ENSG00000279726	2	-1		lncRNA	42851
chr5	140720000	141600000	chr5	141078076	141084481	ENSG00000279558	1	1		lncRNA	6405
chr5	140720000	141600000	chr5	141046260	141096402	ENSG00000279047	4	-1	PCDHB1-AS1	lncRNA	50142
chr5	140720000	141600000	chr5	141177849	141182369	ENSG00000279472	1	1		lncRNA	4520
chr5	140720000	141600000	chr5	141183401	141201396	ENSG00000278936	1	-1		lncRNA	17995
chr5	140720000	141600000	chr5	141326210	141329363	ENSG00000272070	3	1		lncRNA	3153
chr5	140720000	141600000	chr5	141100242	141174391	ENSG00000272154	5	-1		lncRNA	74149
chr5	140720000	141600000	chr5	141136683	141245380	ENSG00000280029	4	-1		lncRNA	108697
chr5	142000000	142600000	chr5	142149435	142150200	ENSG00000289306	1	1		lncRNA	765
chr5	142000000	142600000	chr5	142325209	142672001	ENSG00000231185	9	1	SPRY4-AS1	lncRNA	274791
chr5	149320000	149600000	chr5	149425771	149428289	ENSG00000275871	1	-1		lncRNA	2518
chr5	149320000	149600000	chr5	149324220	149345333	ENSG00000285736	1	-1		lncRNA	21113
chr5	149320000	149600000	chr5	149348116	149357642	ENSG00000253618	1	-1	GRPEL2-AS1	lncRNA	9526
chr5	149320000	149600000	chr5	149372174	149375116	ENSG00000253865	1	1		lncRNA	2942
chr5	149320000	149600000	chr5	149494314	149504670	ENSG00000230551	4	-1		lncRNA	10356
chr5	149320000	149600000	chr5	149406689	149432835	ENSG00000249669	12	1	CARMN	lncRNA	26146
chr5	157240000	157760000	chr5	157260122	157266625	ENSG00000253653	1	-1		lncRNA	6503
chr5	157240000	157760000	chr5	157363382	157365501	ENSG00000251405	3	-1	NIPAL4-DT	lncRNA	2119
chr5	157240000	157760000	chr5	157565964	157569098	ENSG00000253519	1	1		lncRNA	3134
chr5	157240000	157760000	chr5	157682985	157690266	ENSG00000290601	1	-1		lncRNA	7281
chr5	157240000	157760000	chr5	157375741	157384950	ENSG00000248544	2	-1		lncRNA	9209
chr5	168240000	170640000	chr5	168706567	168720884	ENSG00000254042	2	1	SLIT3-AS2	lncRNA	14317
chr5	168240000	170640000	chr5	168993000	168995677	ENSG00000248965	1	1		lncRNA	2677
chr5	168240000	170640000	chr5	169420745	169426885	ENSG00000288912	1	-1		lncRNA	6140
chr5	168240000	170640000	chr5	169772966	169779365	ENSG00000253269	1	-1		lncRNA	6399
chr5	168240000	170640000	chr5	169856650	169861747	ENSG00000289702	1	1		lncRNA	5097
chr5	168240000	170640000	chr5	170306557	170307606	ENSG00000288615	1	-1		lncRNA	1049
chr5	168240000	170640000	chr5	170483806	170486407	ENSG00000253858	1	-1		lncRNA	2601
chr5	168240000	170640000	chr5	168229583	168269415	ENSG00000253978	2	-1	TENM2-AS1	lncRNA	29415
chr5	168240000	170640000	chr5	168654513	168667761	ENSG00000254192	1	1		lncRNA	13248
chr5	168240000	170640000	chr5	169013227	169037998	ENSG00000248222	5	1	SLIT3-AS1	lncRNA	24771
chr5	168240000	170640000	chr5	170191579	170199141	ENSG00000249601	2	-1	LINC01187	lncRNA	7562
chr5	168240000	170640000	chr5	170308701	170312806	ENSG00000250274	2	-1		lncRNA	4105
chr5	168240000	170640000	chr5	170307722	170335508	ENSG00000235172	9	1	LINC01366	lncRNA	27786
chr5	168240000	170640000	chr5	170389493	170422844	ENSG00000253647	1	1	KCNIP1-OT1	lncRNA	33351
chr5	168240000	170640000	chr5	170639158	170681437	ENSG00000253591	2	-1	KCNIP1-AS1	lncRNA	842
chr5	172440000	173600000	chr5	172690454	172697720	ENSG00000253445	1	-1		lncRNA	7266
chr5	172440000	173600000	chr5	172755457	172762587	ENSG00000253295	2	1		lncRNA	7130
chr5	172440000	173600000	chr5	172772187	172772506	ENSG00000289170	1	-1		lncRNA	319
chr5	172440000	173600000	chr5	172807437	172808064	ENSG00000288737	2	1		lncRNA	627
chr5	172440000	173600000	chr5	172802858	172807210	ENSG00000290019	1	1		lncRNA	4352
chr5	172440000	173600000	chr5	172954786	172959392	ENSG00000204758	8	-1	RPL26L1-AS1	lncRNA	4606
chr5	172440000	173600000	chr5	172954907	172957162	ENSG00000254295	1	1		lncRNA	2255
chr5	172440000	173600000	chr5	173144162	173145039	ENSG00000253172	1	-1		lncRNA	877
chr5	172440000	173600000	chr5	173574938	173576275	ENSG00000254164	1	1		lncRNA	1337
chr5	172440000	173600000	chr5	173578275	173585068	ENSG00000253955	2	1	LINC02995	lncRNA	6793
chr5	172440000	173600000	chr5	172543403	172559202	ENSG00000254299	3	-1	LINC01944	lncRNA	15799
chr5	172440000	173600000	chr5	172816592	172819958	ENSG00000253628	2	1		lncRNA	3366
chr5	172440000	173600000	chr5	172762980	172782334	ENSG00000253736	5	1		lncRNA	19354
chr5	172440000	173600000	chr5	173243111	173244854	ENSG00000289493	2	-1		lncRNA	1743
chr5	172440000	173600000	chr5	173463484	173484584	ENSG00000253141	2	1		lncRNA	21100
chr5	172440000	173600000	chr5	173562478	173573199	ENSG00000253768	1	1		lncRNA	10721
chr5	172440000	173600000	chr5	172479274	172536444	ENSG00000287814	1	1		lncRNA	57170
chr5	172440000	173600000	chr5	173383941	173451591	ENSG00000253968	2	1		lncRNA	67650
chr5	176280000	177680000	chr5	176347941	176353584	ENSG00000250909	1	1		lncRNA	5643
chr5	176280000	177680000	chr5	176354206	176356168	ENSG00000251414	1	1		lncRNA	1962
chr5	176280000	177680000	chr5	176743205	176743871	ENSG00000248859	2	1	LINC01574	lncRNA	666
chr5	176280000	177680000	chr5	177051714	177052963	ENSG00000251666	1	1	ZNF346-IT1	lncRNA	1249
chr5	176280000	177680000	chr5	177260340	177263909	ENSG00000286634	1	1		lncRNA	3569
chr5	176280000	177680000	chr5	177494995	177503647	ENSG00000248996	1	1	PDLIM7-AS1	lncRNA	8652
chr5	176280000	177680000	chr5	177554824	177555364	ENSG00000272459	1	1	FAM193B-DT	lncRNA	540
chr5	176280000	177680000	chr5	177619059	177631535	ENSG00000291283	1	-1		lncRNA	12476
chr5	176280000	177680000	chr5	176707356	176726243	ENSG00000248484	1	-1		lncRNA	18887
chr5	176280000	177680000	chr5	176726942	176739458	ENSG00000251446	1	-1		lncRNA	12516
chr5	176280000	177680000	chr5	177438503	177447982	ENSG00000246334	3	-1	PRR7-AS1	lncRNA	9479
chr5	176280000	177680000	chr5	177611240	177619754	ENSG00000247679	3	1		lncRNA	8514
chr5	176280000	177680000	chr5	177632075	177672209	ENSG00000290968	1	-1		lncRNA	40134
chr6	1480000	2760000	chr6	1528364	1528911	ENSG00000272279	1	-1		lncRNA	547
chr6	1480000	2760000	chr6	2437549	2438249	ENSG00000272465	1	1		lncRNA	700
chr6	1480000	2760000	chr6	2621911	2634622	ENSG00000164385	11	-1	LINC01600	lncRNA	12711
chr6	1480000	2760000	chr6	1601654	1607354	ENSG00000280916	4	1	FOXCUT	lncRNA	5700
chr6	1480000	2760000	chr6	2503797	2528665	ENSG00000287903	1	-1		lncRNA	24868
chr6	1480000	2760000	chr6	2353427	2386110	ENSG00000286512	1	-1		lncRNA	32683
chr6	1480000	2760000	chr6	2227803	2230261	ENSG00000285603	1	1		lncRNA	2458
chr6	1480000	2760000	chr6	2617144	2640001	ENSG00000228718	2	1	LINC02521	lncRNA	22857
chr6	1480000	2760000	chr6	2245718	2525976	ENSG00000250903	11	1	GMDS-DT	lncRNA	280258
chr6	2760000	4040000	chr6	2916894	2917733	ENSG00000228365	1	1		lncRNA	839
chr6	2760000	4040000	chr6	2987967	2991173	ENSG00000244041	7	1	LINC01011	lncRNA	3206
chr6	2760000	4040000	chr6	3023472	3027426	ENSG00000288612	1	1		lncRNA	3954
chr6	2760000	4040000	chr6	3055849	3057357	ENSG00000229282	2	1		lncRNA	1508
chr6	2760000	4040000	chr6	3068045	3068894	ENSG00000272277	1	-1		lncRNA	849
chr6	2760000	4040000	chr6	3228771	3230709	ENSG00000288840	1	1		lncRNA	1938
chr6	2760000	4040000	chr6	3311662	3313650	ENSG00000272320	1	1		lncRNA	1988
chr6	2760000	4040000	chr6	3904920	3912072	ENSG00000260604	3	-1		lncRNA	7152
chr6	2760000	4040000	chr6	4018713	4019202	ENSG00000272248	1	1		lncRNA	489
chr6	2760000	4040000	chr6	4018843	4021215	ENSG00000230648	1	-1		lncRNA	2372
chr6	2760000	4040000	chr6	4017266	4018772	ENSG00000288904	2	-1		lncRNA	1506
chr6	2760000	4040000	chr6	2851230	2881407	ENSG00000230438	9	-1	SERPINB9P1	lncRNA	30177
chr6	2760000	4040000	chr6	2989335	2999604	ENSG00000224846	3	-1	NQO2-AS1	lncRNA	10269
chr6	2760000	4040000	chr6	3182626	3195784	ENSG00000230269	7	-1	LINC02525	lncRNA	13158
chr6	2760000	4040000	chr6	3751111	3753871	ENSG00000270504	1	1		lncRNA	2760
chr6	2760000	4040000	chr6	3831933	3855737	ENSG00000238158	6	1		lncRNA	23804
chr6	2760000	4040000	chr6	3831936	3894292	ENSG00000233068	3	1		lncRNA	62356
chr6	2760000	4040000	chr6	3585101	3720081	ENSG00000228793	3	-1		lncRNA	134980
chr6	2760000	4040000	chr6	3138394	3153062	ENSG00000228170	1	-1		lncRNA	14668
chr6	6640000	7280000	chr6	6710477	6713976	ENSG00000287497	3	1		lncRNA	3499
chr6	6640000	7280000	chr6	6725036	6733191	ENSG00000288046	1	1		lncRNA	8155
chr6	6640000	7280000	chr6	6758276	6759291	ENSG00000224532	2	-1		lncRNA	1015
chr6	6640000	7280000	chr6	6885713	6887257	ENSG00000288860	1	1		lncRNA	1544
chr6	6640000	7280000	chr6	6993191	6995727	ENSG00000203498	3	1		lncRNA	2536
chr6	6640000	7280000	chr6	7183083	7185287	ENSG00000225092	2	1		lncRNA	2204
chr6	6640000	7280000	chr6	7258910	7261993	ENSG00000285771	1	-1		lncRNA	3083
chr6	6640000	7280000	chr6	6692741	6801186	ENSG00000226281	6	-1		lncRNA	108445
chr6	6640000	7280000	chr6	6901022	6918715	ENSG00000223342	2	-1		lncRNA	17693
chr6	6640000	7280000	chr6	7276031	7298872	ENSG00000238221	1	1		lncRNA	3969
chr6	6640000	7280000	chr6	6680309	6686948	ENSG00000261211	2	-1		lncRNA	6639
chr6	13760000	15640000	chr6	13825432	13826574	ENSG00000272209	1	1		lncRNA	1142
chr6	13760000	15640000	chr6	14004920	14006901	ENSG00000233981	1	1		lncRNA	1981
chr6	13760000	15640000	chr6	14210293	14214374	ENSG00000286281	1	1		lncRNA	4081
chr6	13760000	15640000	chr6	14229775	14231570	ENSG00000230631	1	-1		lncRNA	1795
chr6	13760000	15640000	chr6	14280127	14285454	ENSG00000226673	2	-1	LINC01108	lncRNA	5327
chr6	13760000	15640000	chr6	14391094	14393929	ENSG00000237346	2	-1		lncRNA	2835
chr6	13760000	15640000	chr6	15243923	15245000	ENSG00000271888	1	-1	JARID2-DT	lncRNA	1077
chr6	13760000	15640000	chr6	15247815	15248634	ENSG00000235488	1	-1	JARID2-AS1	lncRNA	819
chr6	13760000	15640000	chr6	15555780	15559980	ENSG00000287626	1	1		lncRNA	4200
chr6	13760000	15640000	chr6	14394326	14404289	ENSG00000234540	1	1		lncRNA	9963
chr6	13760000	15640000	chr6	14431683	14502701	ENSG00000286277	1	1		lncRNA	71018
chr6	13760000	15640000	chr6	14597514	14599690	ENSG00000229646	2	-1		lncRNA	2176
chr6	13760000	15640000	chr6	14616040	14656819	ENSG00000289958	1	-1		lncRNA	40779
chr6	13760000	15640000	chr6	14152196	14211186	ENSG00000285639	1	-1		lncRNA	58990
chr6	13760000	15640000	chr6	14660285	15090170	ENSG00000234261	6	-1		lncRNA	429885
chr6	20120000	22160000	chr6	20400741	20401503	ENSG00000289981	1	-1		lncRNA	762
chr6	20120000	22160000	chr6	20437821	20440178	ENSG00000224707	1	1	E2F3-IT1	lncRNA	2357
chr6	20120000	22160000	chr6	21354411	21355296	ENSG00000227089	2	-1		lncRNA	885
chr6	20120000	22160000	chr6	21521671	21523845	ENSG00000231754	4	-1		lncRNA	2174
chr6	20120000	22160000	chr6	20265720	20307200	ENSG00000287614	1	1		lncRNA	41480
chr6	20120000	22160000	chr6	20321461	20333193	ENSG00000286590	1	1		lncRNA	11732
chr6	20120000	22160000	chr6	20329922	20334411	ENSG00000287483	1	-1		lncRNA	4489
chr6	20120000	22160000	chr6	20756103	20800694	ENSG00000233848	1	-1		lncRNA	44591
chr6	20120000	22160000	chr6	21369690	21383200	ENSG00000286368	1	-1		lncRNA	13510
chr6	20120000	22160000	chr6	21528739	21595593	ENSG00000283480	1	-1		lncRNA	66854
chr6	20120000	22160000	chr6	22133205	22147193	ENSG00000260455	2	-1	NBAT1	lncRNA	13988
chr6	20120000	22160000	chr6	20212087	20317739	ENSG00000227803	2	1		lncRNA	105652
chr6	20120000	22160000	chr6	21485896	21521414	ENSG00000280989	2	-1	LINC00581	lncRNA	35518
chr6	20120000	22160000	chr6	21233168	21271132	ENSG00000287404	1	-1		lncRNA	37964
chr6	20120000	22160000	chr6	21664184	22654455	ENSG00000272168	10	1	CASC15	lncRNA	495816
chr6	26040000	26600000	chr6	26157477	26157891	ENSG00000289117	2	-1		lncRNA	414
chr6	26040000	26600000	chr6	26272021	26272701	ENSG00000290789	1	-1		lncRNA	680
chr6	26040000	26600000	chr6	26285352	26286234	ENSG00000289447	2	1		lncRNA	882
chr6	26040000	26600000	chr6	26474337	26474441	ENSG00000290055	1	1		lncRNA	104
chr6	26040000	26600000	chr6	26569324	26574698	ENSG00000284607	1	1		lncRNA	5374
chr6	26040000	26600000	chr6	26160765	26172802	ENSG00000283064	1	-1		lncRNA	12037
chr6	26040000	26600000	chr6	26324705	26331900	ENSG00000287050	1	-1		lncRNA	7195
chr6	26040000	26600000	chr6	26421391	26432383	ENSG00000291104	1	1	BTN2A3P	lncRNA	10992
chr6	26040000	26600000	chr6	26521709	26527404	ENSG00000228223	3	1	HCG11	lncRNA	5695
chr6	27120000	27840000	chr6	27122657	27123221	ENSG00000272468	1	-1		lncRNA	564
chr6	27120000	27840000	chr6	27138293	27138540	ENSG00000290032	1	-1		lncRNA	247
chr6	27120000	27840000	chr6	27178342	27178869	ENSG00000290009	1	1		lncRNA	527
chr6	27120000	27840000	chr6	27404010	27406964	ENSG00000271755	1	-1		lncRNA	2954
chr6	27120000	27840000	chr6	27454568	27457575	ENSG00000285849	1	1		lncRNA	3007
chr6	27120000	27840000	chr6	27679971	27680555	ENSG00000287674	1	-1		lncRNA	584
chr6	27120000	27840000	chr6	27757416	27763269	ENSG00000287252	3	1		lncRNA	5853
chr6	27120000	27840000	chr6	27356451	27375277	ENSG00000291112	1	-1		lncRNA	18826
chr6	27120000	27840000	chr6	27473194	27494436	ENSG00000286652	1	1		lncRNA	21242
chr6	27120000	27840000	chr6	27491422	27519435	ENSG00000285703	1	-1		lncRNA	28013
chr6	27120000	27840000	chr6	27694026	27713706	ENSG00000281706	5	1	LINC01012	lncRNA	19680
chr6	30480000	31480000	chr6	30516266	30519217	ENSG00000235781	1	1	LINC02569	lncRNA	2951
chr6	30480000	31480000	chr6	30570638	30571273	ENSG00000290047	1	-1		lncRNA	635
chr6	30480000	31480000	chr6	30723105	30723877	ENSG00000272540	1	-1		lncRNA	772
chr6	30480000	31480000	chr6	30742757	30743638	ENSG00000272273	3	1	IER3-AS1	lncRNA	881
chr6	30480000	31480000	chr6	30838324	30848204	ENSG00000237923	2	-1	LINC02570	lncRNA	9880
chr6	30480000	31480000	chr6	31173735	31177899	ENSG00000204528	3	-1	PSORS1C3	lncRNA	4164
chr6	30480000	31480000	chr6	31195200	31198037	ENSG00000272501	1	-1		lncRNA	2837
chr6	30480000	31480000	chr6	31200165	31201918	ENSG00000271821	1	-1		lncRNA	1753
chr6	30480000	31480000	chr6	31197760	31203968	ENSG00000206344	8	1	HCG27	lncRNA	6208
chr6	30480000	31480000	chr6	31272240	31272590	ENSG00000288813	1	1		lncRNA	350
chr6	30480000	31480000	chr6	31293908	31301642	ENSG00000256166	1	-1	LINC02571	lncRNA	7734
chr6	30480000	31480000	chr6	31394289	31395495	ENSG00000272221	1	-1		lncRNA	1206
chr6	30480000	31480000	chr6	31441667	31446973	ENSG00000230174	1	1	LINC01149	lncRNA	5306
chr6	30480000	31480000	chr6	30460825	30481634	ENSG00000288805	1	-1		lncRNA	1634
chr6	30480000	31480000	chr6	30703067	30713184	ENSG00000224328	1	1	MDC1-AS1	lncRNA	10117
chr6	30480000	31480000	chr6	30743790	30792250	ENSG00000228022	6	1	HCG20	lncRNA	48460
chr6	30480000	31480000	chr6	30866982	30875918	ENSG00000237775	1	-1	DDR1-DT	lncRNA	8936
chr6	30480000	31480000	chr6	30908242	30926459	ENSG00000288473	1	1		lncRNA	18217
chr6	30480000	31480000	chr6	30945979	30954862	ENSG00000233529	1	-1	HCG21	lncRNA	8883
chr6	30480000	31480000	chr6	31367057	31376088	ENSG00000285647	1	1		lncRNA	9031
chr6	30480000	31480000	chr6	31479973	31494935	ENSG00000286940	1	-1	MICB-DT	lncRNA	27
chr6	30480000	31480000	chr6	31463170	31478936	ENSG00000206337	12	1	HCP5	lncRNA	15766
chr6	30480000	31480000	chr6	30798211	30830659	ENSG00000214894	7	-1	LINC00243	lncRNA	32448
chr6	30480000	31480000	chr6	31400702	31463705	ENSG00000288587	1	1		lncRNA	63003
chr6	31640000	32000000	chr6	31658329	31660721	ENSG00000227198	1	1	C6orf47-AS1	lncRNA	2392
chr6	31640000	32000000	chr6	31764310	31765588	ENSG00000235663	1	-1	SAPCD1-AS1	lncRNA	1278
chr6	31640000	32000000	chr6	31821149	31821964	ENSG00000289637	1	-1		lncRNA	815
chr6	31640000	32000000	chr6	31826841	31827443	ENSG00000289829	1	-1		lncRNA	602
chr6	31640000	32000000	chr6	31834608	31839766	ENSG00000204387	14	1	SNHG32	lncRNA	5158
chr6	31640000	32000000	chr6	31934474	31941724	ENSG00000281756	1	-1	C2-AS1	lncRNA	7250
chr6	31640000	32000000	chr6	31999976	32003521	ENSG00000233627	2	-1	C4A-AS1	lncRNA	24
chr6	31640000	32000000	chr6	31686962	31714072	ENSG00000204422	7	-1		lncRNA	27110
chr6	31640000	32000000	chr6	31828834	31839719	ENSG00000285565	1	1		lncRNA	10885
chr6	31640000	32000000	chr6	31877808	31884204	ENSG00000237080	3	1	EHMT2-AS1	lncRNA	6396
chr6	41720000	42880000	chr6	41764292	41764460	ENSG00000269387	1	-1		lncRNA	168
chr6	41720000	42880000	chr6	41791410	41791477	ENSG00000268745	1	1		lncRNA	67
chr6	41720000	42880000	chr6	41868622	41869731	ENSG00000227516	1	1		lncRNA	1109
chr6	41720000	42880000	chr6	42030053	42031382	ENSG00000223946	1	1		lncRNA	1329
chr6	41720000	42880000	chr6	42191657	42192074	ENSG00000289216	1	-1		lncRNA	417
chr6	41720000	42880000	chr6	41720396	41734032	ENSG00000231102	1	1		lncRNA	13636
chr6	43600000	44400000	chr6	43770429	43770616	ENSG00000272114	1	-1		lncRNA	187
chr6	43600000	44400000	chr6	43844878	43852317	ENSG00000283215	2	-1	LINC02537	lncRNA	7439
chr6	43600000	44400000	chr6	43851757	43852333	ENSG00000223469	1	-1		lncRNA	576
chr6	43600000	44400000	chr6	44090787	44095585	ENSG00000287562	1	-1		lncRNA	4798
chr6	43600000	44400000	chr6	43722786	43737834	ENSG00000236961	1	-1		lncRNA	15048
chr6	43600000	44400000	chr6	43803193	43842625	ENSG00000283573	1	1		lncRNA	39432
chr6	43600000	44400000	chr6	44000580	44007612	ENSG00000181577	16	1	LINC03040	lncRNA	7032
chr6	43600000	44400000	chr6	43990798	43999561	ENSG00000289609	2	1		lncRNA	8763
chr6	43600000	44400000	chr6	44058792	44089288	ENSG00000231881	2	1		lncRNA	30496
chr6	43600000	44400000	chr6	43891045	43938212	ENSG00000289313	1	1	LINC01512	lncRNA	47167
chr6	43600000	44400000	chr6	43931572	44074655	ENSG00000237686	8	-1	SCIRT	lncRNA	143083
chr6	46040000	47080000	chr6	46096004	46129857	ENSG00000231769	4	-1		lncRNA	33853
chr6	46040000	47080000	chr6	46758296	46761158	ENSG00000236164	1	-1		lncRNA	2862
chr6	46040000	47080000	chr6	46670444	46688165	ENSG00000242973	6	-1	TDRD6-AS1	lncRNA	17721
chr6	46040000	47080000	chr6	46903471	46909078	ENSG00000225730	1	1	ADGRF5-AS1	lncRNA	5607
chr6	46040000	47080000	chr6	46492052	46606162	ENSG00000236466	2	1	RCAN2-DT	lncRNA	114110
chr6	56320000	58480000	chr6	56331788	56332117	ENSG00000227602	1	-1		lncRNA	329
chr6	56320000	58480000	chr6	57493855	57497691	ENSG00000266579	1	1		lncRNA	3836
chr6	56320000	58480000	chr6	57855891	57856468	ENSG00000272541	1	-1		lncRNA	577
chr6	56320000	58480000	chr6	57880071	57884297	ENSG00000286723	1	-1		lncRNA	4226
chr6	56320000	58480000	chr6	57902609	57903148	ENSG00000271761	1	-1		lncRNA	539
chr6	56320000	58480000	chr6	57908560	57913911	ENSG00000272316	1	-1		lncRNA	5351
chr6	56320000	58480000	chr6	56843928	56864078	ENSG00000231441	2	1	DST-AS1	lncRNA	20150
chr6	56320000	58480000	chr6	57946074	57961501	ENSG00000290555	1	-1	LINC00680	lncRNA	15427
chr6	56320000	58480000	chr6	57114894	57174236	ENSG00000226803	9	-1	ZNF451-AS1	lncRNA	59342
chr6	56320000	58480000	chr6	57919912	57961382	ENSG00000283352	1	-1		lncRNA	41470
chr6	56320000	58480000	chr6	57961438	58438364	ENSG00000225096	3	1		lncRNA	476926
chr6	63280000	63880000	chr6	63571005	63572408	ENSG00000266680	1	-1		lncRNA	1403
chr6	63280000	63880000	chr6	63805797	63822699	ENSG00000236345	3	1	SCAT8	lncRNA	16902
chr6	63280000	63880000	chr6	63378892	63566230	ENSG00000289911	1	-1		lncRNA	187338
chr6	70160000	71360000	chr6	70345919	70351802	ENSG00000287300	1	-1		lncRNA	5883
chr6	70160000	71360000	chr6	70412828	70413950	ENSG00000224349	2	-1	FAM135A-AS1	lncRNA	1122
chr6	70160000	71360000	chr6	70596438	70596980	ENSG00000271967	1	1		lncRNA	542
chr6	70160000	71360000	chr6	71238743	71240947	ENSG00000287380	1	1		lncRNA	2204
chr6	70160000	71360000	chr6	71328942	71329806	ENSG00000230597	1	1		lncRNA	864
chr6	70160000	71360000	chr6	70222758	70242156	ENSG00000253809	1	1		lncRNA	19398
chr6	70160000	71360000	chr6	70394880	70403117	ENSG00000237643	3	1	LINC01610	lncRNA	8237
chr6	70160000	71360000	chr6	71028582	71058476	ENSG00000287939	1	1		lncRNA	29894
chr6	70160000	71360000	chr6	71187161	71420745	ENSG00000233237	9	-1	LINC00472	lncRNA	172839
chr6	73400000	75240000	chr6	73570461	73571961	ENSG00000289286	1	-1		lncRNA	1500
chr6	73400000	75240000	chr6	73693903	73696131	ENSG00000231652	2	-1	CD109-AS1	lncRNA	2228
chr6	73400000	75240000	chr6	74642384	74652002	ENSG00000224583	1	1		lncRNA	9618
chr6	73400000	75240000	chr6	73523618	73570596	ENSG00000229862	5	1	EEF1A1-AS1	lncRNA	46978
chr6	73400000	75240000	chr6	74530248	74734319	ENSG00000272243	6	-1		lncRNA	204071
chr6	73400000	75240000	chr6	74069451	74690727	ENSG00000223786	1	1		lncRNA	621276
chr6	89880000	90600000	chr6	89950116	89953186	ENSG00000226455	1	1		lncRNA	3070
chr6	89880000	90600000	chr6	90376124	90377039	ENSG00000289988	1	1		lncRNA	915
chr6	89880000	90600000	chr6	90073051	90079734	ENSG00000287789	1	1		lncRNA	6683
chr6	89880000	90600000	chr6	90295507	90363912	ENSG00000260271	4	1		lncRNA	68405
chr6	99840000	100680000	chr6	100427118	100437484	ENSG00000228082	1	1	SIM1-AS1	lncRNA	10366
chr6	99840000	100680000	chr6	99993934	100107613	ENSG00000229315	7	1	MCHR2-AS1	lncRNA	113679
chr6	111680000	112080000	chr6	111873588	111877310	ENSG00000289256	2	1		lncRNA	3722
chr6	111680000	112080000	chr6	111900305	111909420	ENSG00000227012	3	-1	LINC02527	lncRNA	9115
chr6	118920000	121320000	chr6	120840733	120845475	ENSG00000287992	1	1		lncRNA	4742
chr6	118920000	121320000	chr6	118934770	119182745	ENSG00000253194	2	1		lncRNA	247975
chr6	118920000	121320000	chr6	120462511	120706789	ENSG00000286540	1	1		lncRNA	244278
chr6	118920000	121320000	chr6	119349886	119689173	ENSG00000287100	3	1		lncRNA	339287
chr6	128800000	129480000	chr6	129479615	129481410	ENSG00000233351	1	-1		lncRNA	385
chr6	128800000	129480000	chr6	129439485	129576047	ENSG00000226149	6	-1		lncRNA	40515
chr6	132800000	133560000	chr6	133435077	133439464	ENSG00000223542	1	-1		lncRNA	4387
chr6	132800000	133560000	chr6	133452857	133456605	ENSG00000234567	1	-1		lncRNA	3748
chr6	132800000	133560000	chr6	133540784	133541174	ENSG00000272428	1	1		lncRNA	390
chr6	132800000	133560000	chr6	133061240	133103128	ENSG00000286438	1	-1		lncRNA	41888
chr6	132800000	133560000	chr6	132954257	133107410	ENSG00000231023	9	1	LINC00326	lncRNA	153153
chr6	132800000	133560000	chr6	133502252	133892802	ENSG00000227954	7	-1	TARID	lncRNA	57748
chr6	138120000	138800000	chr6	138692548	138697288	ENSG00000225177	6	1	NHSL1-AS1	lncRNA	4740
chr6	138120000	138800000	chr6	138725211	138773652	ENSG00000279968	3	-1	CCDC28A-AS1	lncRNA	48441
chr6	139360000	142120000	chr6	141403240	141404494	ENSG00000286452	1	1		lncRNA	1254
chr6	139360000	142120000	chr6	141447011	141451006	ENSG00000259828	1	1		lncRNA	3995
chr6	139360000	142120000	chr6	142088233	142089219	ENSG00000236822	1	1	NMBR-AS1	lncRNA	986
chr6	139360000	142120000	chr6	139856104	139877391	ENSG00000225148	1	-1		lncRNA	21287
chr6	139360000	142120000	chr6	139677639	139860476	ENSG00000231426	7	1	FILNC1	lncRNA	182837
chr6	139360000	142120000	chr6	139938864	139991094	ENSG00000287820	1	-1		lncRNA	52230
chr6	139360000	142120000	chr6	139976352	140093724	ENSG00000236013	8	1	LINC02941	lncRNA	117372
chr6	139360000	142120000	chr6	140575812	140898448	ENSG00000234147	4	-1		lncRNA	322636
chr6	139360000	142120000	chr6	140148490	140785421	ENSG00000288714	1	1		lncRNA	636931
chr6	139360000	142120000	chr6	139271362	139667284	ENSG00000226571	2	1		lncRNA	307284
chr6	139360000	142120000	chr6	139435636	139474658	ENSG00000238099	3	-1	LINC01625	lncRNA	39022
chr6	144080000	144520000	chr6	144139977	144141641	ENSG00000288836	1	1		lncRNA	1664
chr6	144080000	144520000	chr6	144311699	144333301	ENSG00000225311	1	-1		lncRNA	21602
chr6	144560000	145800000	chr6	144922315	144929987	ENSG00000289850	1	1		lncRNA	7672
chr6	144560000	145800000	chr6	145736911	145737173	ENSG00000270828	1	-1		lncRNA	262
chr6	144560000	145800000	chr6	145749917	145751137	ENSG00000288551	1	1		lncRNA	1220
chr6	144560000	145800000	chr6	145296545	145311092	ENSG00000285598	1	1		lncRNA	14547
chr6	144560000	145800000	chr6	145735570	145737218	ENSG00000270638	1	1		lncRNA	1648
chr6	144560000	145800000	chr6	145784406	145786559	ENSG00000288056	1	-1		lncRNA	2153
chr6	144560000	145800000	chr6	145799409	145887430	ENSG00000235652	11	1	EPM2A-DT	lncRNA	591
chr6	146800000	147320000	chr6	146854983	146863460	ENSG00000227748	2	1		lncRNA	8477
chr6	146800000	147320000	chr6	146914424	146914945	ENSG00000289851	1	-1		lncRNA	521
chr6	146800000	147320000	chr6	146948528	146951159	ENSG00000272397	1	-1		lncRNA	2631
chr6	146800000	147320000	chr6	147158925	147180992	ENSG00000196634	3	1	LUADT1	lncRNA	22067
chr6	146800000	147320000	chr6	146824539	147204614	ENSG00000233452	9	-1	STXBP5-AS1	lncRNA	380075
chr6	151000000	151400000	chr6	151054897	151056057	ENSG00000232290	1	-1		lncRNA	1160
chr6	151000000	151400000	chr6	151196681	151197638	ENSG00000231883	1	-1		lncRNA	957
chr6	151000000	151400000	chr6	151088103	151228447	ENSG00000223598	1	-1		lncRNA	140344
chr6	158640000	159000000	chr6	158817979	158822252	ENSG00000233893	2	1	EZR-AS1	lncRNA	4273
chr6	158640000	159000000	chr6	158869848	158919105	ENSG00000203711	16	1	LINC02901	lncRNA	49257
chr6	158640000	159000000	chr6	158853588	158864502	ENSG00000285159	1	1		lncRNA	10914
chr6	158640000	159000000	chr6	158988178	159088114	ENSG00000271913	9	1	TAGAP-AS1	lncRNA	11822
chr6	168880000	169720000	chr6	168999401	169000527	ENSG00000285917	1	-1		lncRNA	1126
chr6	168880000	169720000	chr6	169034197	169035642	ENSG00000229720	1	-1		lncRNA	1445
chr6	168880000	169720000	chr6	169067764	169069427	ENSG00000234519	2	1		lncRNA	1663
chr6	168880000	169720000	chr6	169157162	169163007	ENSG00000223485	5	-1	LINC01615	lncRNA	5845
chr6	168880000	169720000	chr6	169286534	169289216	ENSG00000233085	5	-1		lncRNA	2682
chr6	168880000	169720000	chr6	169419004	169425156	ENSG00000285887	1	-1		lncRNA	6152
chr6	168880000	169720000	chr6	169097799	169102428	ENSG00000286826	1	1		lncRNA	4629
chr6	168880000	169720000	chr6	169175277	169182841	ENSG00000261039	3	-1	LINC02544	lncRNA	7564
chr6	168880000	169720000	chr6	169426420	169452475	ENSG00000272848	2	-1		lncRNA	26055
chr6	168880000	169720000	chr6	169369577	169388385	ENSG00000226194	6	-1	LINC02519	lncRNA	18808
chr6	168880000	169720000	chr6	168920394	168964386	ENSG00000225879	2	-1		lncRNA	43992
chr6	168880000	169720000	chr6	169213254	169245773	ENSG00000226445	2	1	THBS2-AS1	lncRNA	32519
chr7	1560000	2720000	chr7	1620654	1621405	ENSG00000231476	1	1		lncRNA	751
chr7	1560000	2720000	chr7	1691906	1692450	ENSG00000234977	1	-1		lncRNA	544
chr7	1560000	2720000	chr7	1692810	1694357	ENSG00000205971	3	-1		lncRNA	1547
chr7	1560000	2720000	chr7	1738630	1742291	ENSG00000236081	1	-1	ELFN1-AS1	lncRNA	3661
chr7	1560000	2720000	chr7	1838586	1849931	ENSG00000176349	11	1		lncRNA	11345
chr7	1560000	2720000	chr7	2642737	2643373	ENSG00000288792	1	1		lncRNA	636
chr7	1560000	2720000	chr7	1570073	1589626	ENSG00000230487	9	1	PSMG3-AS1	lncRNA	19553
chr7	1560000	2720000	chr7	2614583	2622237	ENSG00000289352	2	-1		lncRNA	7654
chr7	5160000	5800000	chr7	5419827	5420767	ENSG00000241269	1	1		lncRNA	940
chr7	5160000	5800000	chr7	5426277	5428927	ENSG00000234432	4	-1	LINC02983	lncRNA	2650
chr7	5160000	5800000	chr7	5424313	5424942	ENSG00000290091	1	1		lncRNA	629
chr7	5160000	5800000	chr7	5425714	5426402	ENSG00000272953	2	1		lncRNA	688
chr7	5160000	5800000	chr7	5428184	5430566	ENSG00000273084	2	1	LINC03073	lncRNA	2382
chr7	5160000	5800000	chr7	5475804	5479811	ENSG00000230733	2	1		lncRNA	4007
chr7	5160000	5800000	chr7	5556731	5557245	ENSG00000272719	1	1		lncRNA	514
chr7	5160000	5800000	chr7	5419846	5423122	ENSG00000188365	3	1		lncRNA	3276
chr7	5160000	5800000	chr7	5662432	5680461	ENSG00000237738	1	-1	RNF216-IT1	lncRNA	18029
chr7	12520000	13280000	chr7	12570125	12571392	ENSG00000225606	1	-1		lncRNA	1267
chr7	12520000	13280000	chr7	12654179	12654985	ENSG00000229233	1	1		lncRNA	806
chr7	12520000	13280000	chr7	12726152	13751920	ENSG00000229618	3	1		lncRNA	553848
chr7	13280000	14720000	chr7	13339201	13365049	ENSG00000237713	1	-1		lncRNA	25848
chr7	13280000	14720000	chr7	13854355	13862118	ENSG00000224330	2	-1		lncRNA	7763
chr7	13280000	14720000	chr7	12726152	13751920	ENSG00000229618	3	1		lncRNA	471920
chr7	19680000	20680000	chr7	19813685	19818090	ENSG00000237921	2	-1		lncRNA	4405
chr7	19680000	20680000	chr7	20328289	20331781	ENSG00000271133	7	-1	ITGB8-AS1	lncRNA	3492
chr7	19680000	20680000	chr7	20141916	20153531	ENSG00000228598	1	1	MACC1-AS1	lncRNA	11615
chr7	19680000	20680000	chr7	20096137	20130475	ENSG00000267055	1	1		lncRNA	34338
chr7	19680000	20680000	chr7	20296637	20314512	ENSG00000226097	6	1		lncRNA	17875
chr7	19680000	20680000	chr7	20217536	20221702	ENSG00000233834	7	1	GIRGL	lncRNA	4166
chr7	19680000	20680000	chr7	19918981	20140453	ENSG00000243004	7	-1		lncRNA	221472
chr7	23240000	23520000	chr7	23474647	23475372	ENSG00000289109	1	1		lncRNA	725
chr7	23560000	25160000	chr7	23679601	23680842	ENSG00000234286	3	-1		lncRNA	1241
chr7	23560000	25160000	chr7	23891704	23897335	ENSG00000227930	1	-1		lncRNA	5631
chr7	23560000	25160000	chr7	24778444	24795496	ENSG00000287093	1	-1		lncRNA	17052
chr7	23560000	25160000	chr7	24318094	24445128	ENSG00000287523	1	-1		lncRNA	127034
chr7	23560000	25160000	chr7	24196662	24255719	ENSG00000228944	1	-1		lncRNA	59057
chr7	26840000	27160000	chr7	27158344	27158976	ENSG00000270182	1	1		lncRNA	632
chr7	26840000	27160000	chr7	27095647	27100265	ENSG00000233429	9	1	HOTAIRM1	lncRNA	4618
chr7	26840000	27160000	chr7	27147366	27152598	ENSG00000272801	1	-1		lncRNA	5232
chr7	26840000	27160000	chr7	27107777	27134302	ENSG00000253552	8	1	HOXA-AS2	lncRNA	26525
chr7	26840000	27160000	chr7	27128969	27152561	ENSG00000273433	1	-1		lncRNA	23592
chr7	26840000	27160000	chr7	27129977	27155928	ENSG00000254369	6	1	HOXA-AS3	lncRNA	25951
chr7	27160000	28120000	chr7	27168619	27171915	ENSG00000253187	2	1	HOXA10-AS	lncRNA	3296
chr7	27160000	28120000	chr7	27184507	27189298	ENSG00000240990	10	1	HOXA11-AS	lncRNA	4791
chr7	27160000	28120000	chr7	27186573	27193448	ENSG00000253508	1	-1		lncRNA	6875
chr7	27160000	28120000	chr7	27198575	27207259	ENSG00000243766	8	1	HOTTIP	lncRNA	8684
chr7	27160000	28120000	chr7	27210801	27212965	ENSG00000286323	1	-1		lncRNA	2164
chr7	27160000	28120000	chr7	27239243	27241228	ENSG00000253308	2	-1		lncRNA	1985
chr7	27160000	28120000	chr7	27873785	27876546	ENSG00000287489	1	1		lncRNA	2761
chr7	27160000	28120000	chr7	27241429	27247229	ENSG00000253405	1	-1	EVX1-AS	lncRNA	5800
chr7	27160000	28120000	chr7	27617474	27627496	ENSG00000286478	1	1		lncRNA	10022
chr7	27160000	28120000	chr7	27733064	27740395	ENSG00000229893	2	-1	TAX1BP1-AS1	lncRNA	7331
chr7	27160000	28120000	chr7	27361591	27410358	ENSG00000224322	2	1		lncRNA	48767
chr7	44560000	45160000	chr7	44582519	44583676	ENSG00000287574	1	1		lncRNA	1157
chr7	44560000	45160000	chr7	44785050	44787340	ENSG00000228596	1	-1		lncRNA	2290
chr7	44560000	45160000	chr7	44848416	44849568	ENSG00000234183	1	1	H2AZ2-DT	lncRNA	1152
chr7	44560000	45160000	chr7	44884953	44886393	ENSG00000272768	1	1		lncRNA	1440
chr7	44560000	45160000	chr7	44958999	44960909	ENSG00000260997	1	-1		lncRNA	1910
chr7	44560000	45160000	chr7	44983019	44986961	ENSG00000232956	10	-1	SNHG15	lncRNA	3942
chr7	45840000	47240000	chr7	45990905	46000898	ENSG00000229628	1	1		lncRNA	9993
chr7	45840000	47240000	chr7	46476457	46477940	ENSG00000240355	1	-1		lncRNA	1483
chr7	45840000	47240000	chr7	45940449	45986472	ENSG00000237471	2	1		lncRNA	46023
chr7	45840000	47240000	chr7	46302120	46343621	ENSG00000237760	1	1		lncRNA	41501
chr7	45840000	47240000	chr7	46477822	46481578	ENSG00000230680	2	-1		lncRNA	3756
chr7	45840000	47240000	chr7	46673785	46759851	ENSG00000233539	5	-1		lncRNA	86066
chr7	45840000	47240000	chr7	46969644	47027481	ENSG00000223829	6	1		lncRNA	57837
chr7	45840000	47240000	chr7	46261064	46294469	ENSG00000229459	1	1		lncRNA	33405
chr7	45840000	47240000	chr7	46890625	47049678	ENSG00000232072	1	-1		lncRNA	159053
chr7	45840000	47240000	chr7	47000620	47079128	ENSG00000229192	6	-1		lncRNA	78508
chr7	47240000	48160000	chr7	47252139	47254558	ENSG00000286315	1	-1		lncRNA	2419
chr7	47240000	48160000	chr7	47761476	47766772	ENSG00000146666	5	1	LINC00525	lncRNA	5296
chr7	47240000	48160000	chr7	47608465	47629893	ENSG00000236078	2	1	LINC01447	lncRNA	21428
chr7	47240000	48160000	chr7	47655244	47661648	ENSG00000221845	4	1	LINC02902	lncRNA	6404
chr7	47240000	48160000	chr7	47795291	47819847	ENSG00000136275	10	1	PKD1L1-AS1	lncRNA	24556
chr7	54720000	56160000	chr7	55592074	55593193	ENSG00000233977	1	1		lncRNA	1119
chr7	54720000	56160000	chr7	55593777	55595006	ENSG00000231394	1	1		lncRNA	1229
chr7	54720000	56160000	chr7	54721724	54731047	ENSG00000286404	1	1		lncRNA	9323
chr7	54720000	56160000	chr7	55235965	55255635	ENSG00000280890	1	-1	ELDR	lncRNA	19670
chr7	54720000	56160000	chr7	55681074	55689301	ENSG00000291029	1	-1	FKBP9P1	lncRNA	8227
chr7	54720000	56160000	chr7	54759313	54812727	ENSG00000234707	5	1	SEC61G-DT	lncRNA	53414
chr7	54720000	56160000	chr7	55179750	55188977	ENSG00000224057	2	-1	EGFR-AS1	lncRNA	9227
chr7	54720000	56160000	chr7	55573171	55588336	ENSG00000223475	1	1	VOPP1-DT	lncRNA	15165
chr7	73240000	74200000	chr7	73609262	73611502	ENSG00000274080	1	-1		lncRNA	2240
chr7	73240000	74200000	chr7	73985992	73988767	ENSG00000261467	2	1		lncRNA	2775
chr7	73240000	74200000	chr7	74058905	74062287	ENSG00000232415	2	-1	ELN-AS1	lncRNA	3382
chr7	73240000	74200000	chr7	73242751	73271614	ENSG00000290839	1	-1		lncRNA	28863
chr7	76640000	79240000	chr7	76972679	76976961	ENSG00000225703	1	-1		lncRNA	4282
chr7	76640000	79240000	chr7	77416673	77425444	ENSG00000273341	2	1		lncRNA	8771
chr7	76640000	79240000	chr7	77990384	77995171	ENSG00000232756	1	1	DDX3ILA1	lncRNA	4787
chr7	76640000	79240000	chr7	78939850	78940895	ENSG00000251276	1	1	MAGI2-AS1	lncRNA	1045
chr7	76640000	79240000	chr7	79008988	79012277	ENSG00000226978	1	1	MAGI2-AS2	lncRNA	3289
chr7	76640000	79240000	chr7	76902480	76919191	ENSG00000231183	4	1		lncRNA	16711
chr7	76640000	79240000	chr7	76818377	76903041	ENSG00000285666	1	-1		lncRNA	84664
chr7	76640000	79240000	chr7	76959835	77043775	ENSG00000265479	7	1	DTX2P1-UPK3BP1-PMS2P11	lncRNA	83940
chr7	76640000	79240000	chr7	77083681	77122340	ENSG00000291121	1	-1		lncRNA	38659
chr7	76640000	79240000	chr7	77246340	77258123	ENSG00000250990	1	-1		lncRNA	11783
chr7	76640000	79240000	chr7	77487317	77498965	ENSG00000287519	1	-1		lncRNA	11648
chr7	76640000	79240000	chr7	77657659	77696290	ENSG00000214293	11	-1	APTR	lncRNA	38631
chr7	76640000	79240000	chr7	78392626	78448999	ENSG00000285892	1	-1		lncRNA	56373
chr7	76640000	79240000	chr7	77043721	77198626	ENSG00000259628	1	1		lncRNA	154905
chr7	76640000	79240000	chr7	79139829	79177210	ENSG00000281120	1	1		lncRNA	37381
chr7	80040000	80680000	chr7	80246409	80312456	ENSG00000234223	2	-1		lncRNA	66047
chr7	80040000	80680000	chr7	80312574	80391474	ENSG00000232667	12	-1		lncRNA	78900
chr7	83880000	85040000	chr7	84939349	84940245	ENSG00000232019	1	-1		lncRNA	896
chr7	83880000	85040000	chr7	84532476	84584322	ENSG00000235139	2	1	LINC03017	lncRNA	51846
chr7	92560000	93120000	chr7	92638198	92642316	ENSG00000287932	1	-1		lncRNA	4118
chr7	92560000	93120000	chr7	92647906	92667083	ENSG00000286742	1	1		lncRNA	19177
chr7	92560000	93120000	chr7	92836367	92917188	ENSG00000237819	7	1	CDK6-AS1	lncRNA	80821
chr7	98240000	98880000	chr7	98322853	98323430	ENSG00000272950	1	1		lncRNA	577
chr7	98240000	98880000	chr7	98616014	98617150	ENSG00000288889	2	-1		lncRNA	1136
chr7	106760000	107160000	chr7	106372251	106770207	ENSG00000243797	6	-1		lncRNA	10207
chr7	106760000	107160000	chr7	106774955	106838480	ENSG00000228742	11	1	LINC02577	lncRNA	63525
chr7	106760000	107160000	chr7	107066591	107133733	ENSG00000243193	4	-1	PRKAR2B-AS1	lncRNA	67142
chr7	116120000	117160000	chr7	116542718	116551969	ENSG00000235427	1	-1		lncRNA	9251
chr7	116120000	117160000	chr7	116952446	116954334	ENSG00000227199	1	-1	ST7-AS1	lncRNA	1888
chr7	116120000	117160000	chr7	116965846	116967472	ENSG00000228368	1	-1		lncRNA	1626
chr7	116120000	117160000	chr7	116275606	116286734	ENSG00000237870	6	-1		lncRNA	11128
chr7	116120000	117160000	chr7	117072072	117146480	ENSG00000226367	6	-1	ST7-AS2	lncRNA	74408
chr7	116120000	117160000	chr7	117091678	117097262	ENSG00000287829	1	-1		lncRNA	5584
chr7	116120000	117160000	chr7	116237929	116327896	ENSG00000243243	5	-1		lncRNA	89967
chr7	116120000	117160000	chr7	116953899	117098806	ENSG00000214188	9	1	ST7-OT4	lncRNA	144907
chr7	116120000	117160000	chr7	116563594	116663829	ENSG00000231210	3	-1	COMETT	lncRNA	100235
chr7	116120000	117160000	chr7	116238260	116499465	ENSG00000237813	4	-1		lncRNA	261205
chr7	120760000	122040000	chr7	121304657	121309842	ENSG00000287554	1	-1		lncRNA	5185
chr7	120760000	122040000	chr7	121643334	121686363	ENSG00000227743	2	-1		lncRNA	43029
chr7	120760000	122040000	chr7	121450948	121511194	ENSG00000289578	1	-1		lncRNA	60246
chr7	128360000	130040000	chr7	128524016	128531069	ENSG00000273270	1	-1	LINC03072	lncRNA	7053
chr7	128360000	130040000	chr7	128667043	128668156	ENSG00000271553	1	1		lncRNA	1113
chr7	128360000	130040000	chr7	128690451	128691717	ENSG00000271344	1	1		lncRNA	1266
chr7	128360000	130040000	chr7	129209775	129213545	ENSG00000243230	1	-1		lncRNA	3770
chr7	128360000	130040000	chr7	129604548	129611671	ENSG00000273329	2	-1		lncRNA	7123
chr7	128360000	130040000	chr7	129642758	129645063	ENSG00000288881	1	1		lncRNA	2305
chr7	128360000	130040000	chr7	129780410	129783855	ENSG00000290319	1	1		lncRNA	3445
chr7	128360000	130040000	chr7	129783370	129785185	ENSG00000242078	1	-1		lncRNA	1815
chr7	128360000	130040000	chr7	128455840	128493859	ENSG00000273184	1	1		lncRNA	38019
chr7	128360000	130040000	chr7	128455937	128469197	ENSG00000240758	2	1	HILPDA-AS1	lncRNA	13260
chr7	128360000	130040000	chr7	128850162	128862626	ENSG00000242902	1	-1	FLNC-AS1	lncRNA	12464
chr7	128360000	130040000	chr7	129763060	129780220	ENSG00000286380	3	-1		lncRNA	17160
chr7	128360000	130040000	chr7	128531707	128663479	ENSG00000242588	7	1		lncRNA	131772
chr7	128360000	130040000	chr7	129366827	129374486	ENSG00000286722	1	-1		lncRNA	7659
chr7	128360000	130040000	chr7	129953234	130026989	ENSG00000244036	3	1	UBE2H-DT	lncRNA	73755
chr7	130040000	130840000	chr7	130141707	130142618	ENSG00000229196	4	1	LINC03008	lncRNA	911
chr7	130040000	130840000	chr7	130486042	130491033	ENSG00000272701	3	-1	MESTIT1	lncRNA	4991
chr7	130040000	130840000	chr7	130495794	130498427	ENSG00000270823	1	-1		lncRNA	2633
chr7	130040000	130840000	chr7	130507660	130508282	ENSG00000270953	1	1		lncRNA	622
chr7	130040000	130840000	chr7	130538954	130546900	ENSG00000286214	1	1	COPG2IT1	lncRNA	7946
chr7	130040000	130840000	chr7	130668852	130669395	ENSG00000287547	1	1		lncRNA	543
chr7	130040000	130840000	chr7	130790208	130791724	ENSG00000271522	1	1		lncRNA	1516
chr7	130040000	130840000	chr7	130173718	130205361	ENSG00000240571	1	1		lncRNA	31643
chr7	130040000	130840000	chr7	130481491	130484392	ENSG00000259920	1	-1		lncRNA	2901
chr7	130040000	130840000	chr7	130791264	131110176	ENSG00000231721	8	-1	LINC-PINT	lncRNA	48736
chr7	131040000	131480000	chr7	131309469	131328312	ENSG00000236753	7	-1	MKLN1-AS	lncRNA	18843
chr7	131040000	131480000	chr7	130791264	131110176	ENSG00000231721	8	-1	LINC-PINT	lncRNA	70176
chr7	139360000	140400000	chr7	140177184	140179640	ENSG00000260231	2	1	KDM7A-DT	lncRNA	2456
chr7	151520000	152040000	chr7	151736621	151738828	ENSG00000290095	1	1		lncRNA	2207
chr7	151520000	152040000	chr7	151806490	151810820	ENSG00000242048	3	1	PRKAG2-AS2	lncRNA	4330
chr7	151520000	152040000	chr7	151877042	151879229	ENSG00000239911	4	1	PRKAG2-AS1	lncRNA	2187
chr7	151520000	152040000	chr7	151950386	151954985	ENSG00000227562	1	-1		lncRNA	4599
chr8	200000	2240000	chr8	233119	233692	ENSG00000272812	1	1		lncRNA	573
chr8	200000	2240000	chr8	234347	234887	ENSG00000272240	1	-1		lncRNA	540
chr8	200000	2240000	chr8	237045	237669	ENSG00000273402	1	1		lncRNA	624
chr8	200000	2240000	chr8	265117	274351	ENSG00000288985	2	-1		lncRNA	9234
chr8	200000	2240000	chr8	450714	451343	ENSG00000272293	1	-1		lncRNA	629
chr8	200000	2240000	chr8	725188	725877	ENSG00000254207	1	-1		lncRNA	689
chr8	200000	2240000	chr8	738548	740374	ENSG00000282375	1	1		lncRNA	1826
chr8	200000	2240000	chr8	891251	893112	ENSG00000282759	1	-1		lncRNA	1861
chr8	200000	2240000	chr8	1018757	1019704	ENSG00000282692	1	1		lncRNA	947
chr8	200000	2240000	chr8	1246789	1248760	ENSG00000254160	1	-1		lncRNA	1971
chr8	200000	2240000	chr8	1296034	1302607	ENSG00000275427	1	-1		lncRNA	6573
chr8	200000	2240000	chr8	1368642	1369833	ENSG00000260721	1	-1		lncRNA	1191
chr8	200000	2240000	chr8	1377867	1380307	ENSG00000281961	1	1		lncRNA	2440
chr8	200000	2240000	chr8	1758208	1760447	ENSG00000282021	1	-1		lncRNA	2239
chr8	200000	2240000	chr8	1761054	1764508	ENSG00000253982	3	-1	CLN8-AS1	lncRNA	3454
chr8	200000	2240000	chr8	1810823	1817113	ENSG00000287464	1	-1		lncRNA	6290
chr8	200000	2240000	chr8	1957921	1963131	ENSG00000285957	1	-1		lncRNA	5210
chr8	200000	2240000	chr8	1971397	1976478	ENSG00000253696	2	1	KBTBD11-OT1	lncRNA	5081
chr8	200000	2240000	chr8	1974818	1975314	ENSG00000270988	1	1		lncRNA	496
chr8	200000	2240000	chr8	1971153	1974768	ENSG00000253764	4	-1	KBTBD11-AS1	lncRNA	3615
chr8	200000	2240000	chr8	2023105	2031342	ENSG00000289473	2	1		lncRNA	8237
chr8	200000	2240000	chr8	2033508	2035587	ENSG00000253805	1	1		lncRNA	2079
chr8	200000	2240000	chr8	2130550	2134880	ENSG00000287970	1	-1		lncRNA	4330
chr8	200000	2240000	chr8	2203320	2207704	ENSG00000288782	1	1		lncRNA	4384
chr8	200000	2240000	chr8	311133	331026	ENSG00000249868	5	-1		lncRNA	19893
chr8	200000	2240000	chr8	375931	384079	ENSG00000182366	11	-1	FAM87A	lncRNA	8148
chr8	200000	2240000	chr8	1373685	1381394	ENSG00000282160	1	1		lncRNA	7709
chr8	200000	2240000	chr8	2156683	2183273	ENSG00000289036	2	1		lncRNA	26590
chr8	200000	2240000	chr8	1565509	1622417	ENSG00000253267	5	-1	DLGAP2-AS1	lncRNA	56908
chr8	6400000	7400000	chr8	6572571	6576219	ENSG00000288076	1	-1		lncRNA	3648
chr8	6400000	7400000	chr8	6615604	6617198	ENSG00000271743	1	-1		lncRNA	1594
chr8	6400000	7400000	chr8	6403551	6407142	ENSG00000246089	5	-1	MCPH1-DT	lncRNA	3591
chr8	6400000	7400000	chr8	6780874	6789021	ENSG00000287747	1	1		lncRNA	8147
chr8	6400000	7400000	chr8	6835535	6885276	ENSG00000245857	4	1	GS1-24F4.2	lncRNA	49741
chr8	6400000	7400000	chr8	6928608	6930473	ENSG00000254625	1	1		lncRNA	1865
chr8	6400000	7400000	chr8	7092275	7187316	ENSG00000290357	1	1		lncRNA	95041
chr8	6400000	7400000	chr8	6617310	6708224	ENSG00000249898	10	-1	MCPH1-AS1	lncRNA	90914
chr8	6400000	7400000	chr8	7298744	7355359	ENSG00000215374	6	-1	FAM66B	lncRNA	56615
chr8	8160000	9840000	chr8	8456715	8461337	ENSG00000254153	2	-1	LINC02950	lncRNA	4622
chr8	8160000	9840000	chr8	8555738	8560965	ENSG00000253343	1	-1		lncRNA	5227
chr8	8160000	9840000	chr8	8559894	8562124	ENSG00000253774	1	1		lncRNA	2230
chr8	8160000	9840000	chr8	9158063	9158621	ENSG00000279949	1	1		lncRNA	558
chr8	8160000	9840000	chr8	9180251	9182519	ENSG00000253252	2	-1		lncRNA	2268
chr8	8160000	9840000	chr8	8167819	8226614	ENSG00000253893	2	-1	FAM85B	lncRNA	58795
chr8	8160000	9840000	chr8	8228595	8244865	ENSG00000291049	1	1	FAM86B3P	lncRNA	16270
chr8	8160000	9840000	chr8	8234341	8244667	ENSG00000291048	1	-1		lncRNA	10326
chr8	8160000	9840000	chr8	8414204	8424648	ENSG00000253505	4	-1	LINC02949	lncRNA	10444
chr8	8160000	9840000	chr8	8561386	8574038	ENSG00000253130	2	1		lncRNA	12652
chr8	8160000	9840000	chr8	8665497	8669404	ENSG00000286910	1	1		lncRNA	3907
chr8	8160000	9840000	chr8	9141424	9145503	ENSG00000254340	2	1		lncRNA	4079
chr8	8160000	9840000	chr8	9255349	9260295	ENSG00000253887	1	-1		lncRNA	4946
chr8	8160000	9840000	chr8	9367898	9436205	ENSG00000254237	6	-1		lncRNA	68307
chr8	8160000	9840000	chr8	9351238	9358441	ENSG00000253735	1	-1		lncRNA	7203
chr8	8160000	9840000	chr8	8059572	8199973	ENSG00000284606	1	1		lncRNA	39973
chr8	8160000	9840000	chr8	8618473	8655986	ENSG00000289622	2	1		lncRNA	37513
chr8	8160000	9840000	chr8	9151695	9425524	ENSG00000248538	10	1	PPP1R3B-DT	lncRNA	273829
chr8	8160000	9840000	chr8	8723693	8782479	ENSG00000254367	5	-1		lncRNA	58786
chr8	9840000	10400000	chr8	10050485	10054254	ENSG00000260093	1	-1	MSRA-DT	lncRNA	3769
chr8	9840000	10400000	chr8	10275499	10279737	ENSG00000285606	1	-1		lncRNA	4238
chr8	9840000	10400000	chr8	9899871	9919233	ENSG00000253230	11	-1	MIR124-1HG	lncRNA	19362
chr8	9840000	10400000	chr8	9984004	10055041	ENSG00000286622	1	-1		lncRNA	71037
chr8	9840000	10400000	chr8	10118005	10147478	ENSG00000285675	2	-1		lncRNA	29473
chr8	16760000	17160000	chr8	17026456	17027195	ENSG00000289225	2	-1		lncRNA	739
chr8	16760000	17160000	chr8	17131181	17149789	ENSG00000249258	2	1		lncRNA	18608
chr8	16760000	17160000	chr8	16598758	16915044	ENSG00000253496	3	-1		lncRNA	155044
chr8	17240000	17960000	chr8	17510613	17511300	ENSG00000279932	1	1		lncRNA	687
chr8	17240000	17960000	chr8	17604667	17610269	ENSG00000287303	1	-1		lncRNA	5602
chr8	17240000	17960000	chr8	17703988	17706187	ENSG00000253168	1	1		lncRNA	2199
chr8	17240000	17960000	chr8	17882043	17882661	ENSG00000253215	1	1		lncRNA	618
chr8	17240000	17960000	chr8	17808361	17822183	ENSG00000253671	3	1		lncRNA	13822
chr8	17240000	17960000	chr8	17900484	17908011	ENSG00000254054	3	1		lncRNA	7527
chr8	17240000	17960000	chr8	17801345	17861069	ENSG00000253944	1	1	MTUS1-DT	lncRNA	59724
chr8	18880000	19360000	chr8	18989279	19000952	ENSG00000253335	1	1		lncRNA	11673
chr8	18880000	19360000	chr8	19246350	19249240	ENSG00000254201	1	1		lncRNA	2890
chr8	18880000	19360000	chr8	19254241	19257334	ENSG00000253280	1	-1		lncRNA	3093
chr8	18880000	19360000	chr8	19084992	19259469	ENSG00000253557	6	-1		lncRNA	174477
chr8	18880000	19360000	chr8	19091703	19145449	ENSG00000254242	2	1		lncRNA	53746
chr8	23440000	24240000	chr8	23493009	23494198	ENSG00000253986	1	-1		lncRNA	1189
chr8	23440000	24240000	chr8	23509012	23509748	ENSG00000289461	2	1		lncRNA	736
chr8	23440000	24240000	chr8	24169001	24177080	ENSG00000253891	2	-1		lncRNA	8079
chr8	23440000	24240000	chr8	23492170	23494897	ENSG00000287166	1	1		lncRNA	2727
chr8	23440000	24240000	chr8	23458601	23484971	ENSG00000253390	1	1	ENTPD4-DT	lncRNA	26370
chr8	23440000	24240000	chr8	23707141	23789487	ENSG00000253471	1	1		lncRNA	82346
chr8	23440000	24240000	chr8	23714066	23743042	ENSG00000254002	4	-1		lncRNA	28976
chr8	25120000	25480000	chr8	25425521	25426580	ENSG00000253476	1	-1		lncRNA	1059
chr8	25120000	25480000	chr8	25179113	25184234	ENSG00000287185	1	-1		lncRNA	5121
chr8	28600000	30160000	chr8	28690215	28702030	ENSG00000246339	6	-1	EXTL3-AS1	lncRNA	11815
chr8	28600000	30160000	chr8	28798142	28802085	ENSG00000254034	2	1	INTS9-AS1	lncRNA	3943
chr8	28600000	30160000	chr8	29055929	29057395	ENSG00000259366	3	1		lncRNA	1466
chr8	28600000	30160000	chr8	29067279	29068454	ENSG00000259607	1	1		lncRNA	1175
chr8	28600000	30160000	chr8	29352420	29353170	ENSG00000260253	1	-1		lncRNA	750
chr8	28600000	30160000	chr8	29527312	29530323	ENSG00000253632	1	1		lncRNA	3011
chr8	28600000	30160000	chr8	29529299	29529922	ENSG00000288964	1	-1		lncRNA	623
chr8	28600000	30160000	chr8	29905735	29908956	ENSG00000253604	1	1		lncRNA	3221
chr8	28600000	30160000	chr8	30082758	30083467	ENSG00000272256	1	1		lncRNA	709
chr8	28600000	30160000	chr8	30094324	30095370	ENSG00000289334	1	-1		lncRNA	1046
chr8	28600000	30160000	chr8	30155828	30156633	ENSG00000271869	2	-1	DCTN6-DT	lncRNA	805
chr8	28600000	30160000	chr8	28949676	28955955	ENSG00000259196	1	1	HMBOX1-IT1	lncRNA	6279
chr8	28600000	30160000	chr8	29110573	29140729	ENSG00000254129	1	1		lncRNA	30156
chr8	28600000	30160000	chr8	29288506	29320284	ENSG00000288735	2	-1		lncRNA	31778
[truncated: 14,024 more rows]

## Sheet: CRC7
chr1	760000	2080000	chr1	760911	761989	ENSG00000229905	1	1		lncRNA	1078
chr1	760000	2080000	chr1	781937	782050	ENSG00000285268	1	1		transcribed_processed_pseudogene	113
chr1	760000	2080000	chr1	805799	810161	ENSG00000230092	8	-1		transcribed_unprocessed_pseudogene	4362
chr1	760000	2080000	chr1	824228	827539	ENSG00000225880	6	-1	LINC00115	lncRNA	3311
chr1	760000	2080000	chr1	860226	868202	ENSG00000288531	1	1		lncRNA	7976
chr1	760000	2080000	chr1	873292	874349	ENSG00000234711	1	1	TUBB8P11	unprocessed_pseudogene	1057
chr1	760000	2080000	chr1	874529	877234	ENSG00000283040	1	-1		transcribed_unprocessed_pseudogene	2705
chr1	760000	2080000	chr1	904834	915976	ENSG00000272438	1	1		lncRNA	11142
chr1	760000	2080000	chr1	911435	914948	ENSG00000230699	2	1		lncRNA	3513
chr1	760000	2080000	chr1	914171	914971	ENSG00000241180	1	1		lncRNA	800
chr1	760000	2080000	chr1	960584	965719	ENSG00000187961	15	1	KLHL17	protein_coding	5135
chr1	760000	2080000	chr1	975198	982117	ENSG00000187642	10	-1	PERM1	protein_coding	6919
chr1	760000	2080000	chr1	995966	998051	ENSG00000272512	1	-1		lncRNA	2085
chr1	760000	2080000	chr1	1001138	1014540	ENSG00000187608	10	1	ISG15	protein_coding	13402
chr1	760000	2080000	chr1	1008076	1008229	ENSG00000231702	2	-1		processed_pseudogene	153
chr1	760000	2080000	chr1	1011997	1013193	ENSG00000224969	1	-1		lncRNA	1196
chr1	760000	2080000	chr1	1055033	1056116	ENSG00000242590	1	1		lncRNA	1083
chr1	760000	2080000	chr1	1062208	1063288	ENSG00000273443	1	-1		lncRNA	1080
chr1	760000	2080000	chr1	1070967	1074306	ENSG00000237330	3	-1	RNF223	protein_coding	3339
chr1	760000	2080000	chr1	1137017	1144056	ENSG00000223823	1	1	LINC01342	lncRNA	7039
chr1	760000	2080000	chr1	1169357	1170343	ENSG00000272141	1	1		lncRNA	986
chr1	760000	2080000	chr1	1173056	1179555	ENSG00000205231	1	-1	TTLL10-AS1	lncRNA	6499
chr1	760000	2080000	chr1	1167104	1167198	ENSG00000207730	3	1	MIR200B	miRNA	94
chr1	760000	2080000	chr1	1167863	1167952	ENSG00000207607	3	1	MIR200A	miRNA	89
chr1	760000	2080000	chr1	1169005	1169087	ENSG00000198976	1	1	MIR429	miRNA	82
chr1	760000	2080000	chr1	1203508	1206592	ENSG00000186891	14	-1	TNFRSF18	protein_coding	3084
chr1	760000	2080000	chr1	1232237	1235041	ENSG00000176022	7	1	B3GALT6	protein_coding	2804
chr1	760000	2080000	chr1	1249777	1251334	ENSG00000260179	1	-1		lncRNA	1557
chr1	760000	2080000	chr1	1280436	1292029	ENSG00000162572	21	1	SCNN1D	protein_coding	11593
chr1	760000	2080000	chr1	1296110	1296170	ENSG00000278073	1	-1	MIR6726	miRNA	60
chr1	760000	2080000	chr1	1311585	1324687	ENSG00000127054	22	-1	INTS11	protein_coding	13102
chr1	760000	2080000	chr1	1312502	1312566	ENSG00000283712	1	-1	MIR6727	miRNA	64
chr1	760000	2080000	chr1	1317581	1318689	ENSG00000240731	1	-1		lncRNA	1108
chr1	760000	2080000	chr1	1331280	1335314	ENSG00000169962	5	1	TAS1R3	protein_coding	4034
chr1	760000	2080000	chr1	1339650	1339708	ENSG00000284372	1	-1	MIR6808	miRNA	58
chr1	760000	2080000	chr1	1373730	1375207	ENSG00000175756	14	-1	AURKAIP1	protein_coding	1477
chr1	760000	2080000	chr1	1378666	1379032	ENSG00000223663	2	1	NDUFB4P8	processed_pseudogene	366
chr1	760000	2080000	chr1	1401909	1407293	ENSG00000242485	6	-1	MRPL20	protein_coding	5384
chr1	760000	2080000	chr1	1405460	1405752	ENSG00000264293	2	-1	RN7SL657P	misc_RNA	292
chr1	760000	2080000	chr1	1399515	1402046	ENSG00000224870	9	1	MRPL20-AS1	lncRNA	2531
chr1	760000	2080000	chr1	1409096	1410618	ENSG00000272455	1	1	MRPL20-DT	lncRNA	1522
chr1	760000	2080000	chr1	1420245	1422691	ENSG00000225905	1	1	ANKRD65-AS1	lncRNA	2446
chr1	760000	2080000	chr1	1418420	1421769	ENSG00000235098	9	-1	ANKRD65	protein_coding	3349
chr1	760000	2080000	chr1	1430539	1434573	ENSG00000225285	1	-1	LINC01770	lncRNA	4034
chr1	760000	2080000	chr1	1425871	1430255	ENSG00000205116	4	1	TMEM88B	protein_coding	4384
chr1	760000	2080000	chr1	1583510	1583909	ENSG00000274481	1	-1		processed_pseudogene	399
chr1	760000	2080000	chr1	1574102	1577075	ENSG00000215014	5	1		lncRNA	2973
chr1	760000	2080000	chr1	1598012	1600135	ENSG00000228594	4	-1	FNDC10	protein_coding	2123
chr1	760000	2080000	chr1	1600314	1602703	ENSG00000286989	1	1		lncRNA	2389
chr1	760000	2080000	chr1	1613758	1615795	ENSG00000272106	1	-1		lncRNA	2037
chr1	760000	2080000	chr1	1632163	1635263	ENSG00000189409	14	1	MMP23B	protein_coding	3100
chr1	760000	2080000	chr1	1659325	1662602	ENSG00000272004	1	1		lncRNA	3277
chr1	760000	2080000	chr1	1671990	1674397	ENSG00000269737	2	1		transcribed_processed_pseudogene	2407
chr1	760000	2080000	chr1	1699942	1701782	ENSG00000215914	4	1	MMP23A	unprocessed_pseudogene	1840
chr1	760000	2080000	chr1	1891223	1892726	ENSG00000231050	3	1	GNB1-DT	lncRNA	1503
chr1	760000	2080000	chr1	1917590	1919279	ENSG00000178821	13	-1	TMEM52	protein_coding	1689
chr1	760000	2080000	chr1	2019329	2030758	ENSG00000187730	9	1	GABRD	protein_coding	11429
chr1	760000	2080000	chr1	2049203	2050070	ENSG00000226969	1	-1	PRKCZ-DT	lncRNA	867
chr1	760000	2080000	chr1	764723	774280	ENSG00000228327	6	-1		transcribed_unprocessed_pseudogene	9557
chr1	760000	2080000	chr1	725885	778688	ENSG00000291215	1	-1		lncRNA	18688
chr1	760000	2080000	chr1	817371	819837	ENSG00000177757	2	1	FAM87B	lncRNA	2466
chr1	760000	2080000	chr1	868071	876903	ENSG00000230368	2	-1	FAM41C	lncRNA	8832
chr1	760000	2080000	chr1	825138	859446	ENSG00000228794	12	1	LINC01128	lncRNA	34308
chr1	760000	2080000	chr1	800879	817712	ENSG00000290784	1	-1		lncRNA	16833
chr1	760000	2080000	chr1	944203	959309	ENSG00000188976	11	-1	NOC2L	protein_coding	15106
chr1	760000	2080000	chr1	966482	975865	ENSG00000187583	11	1	PLEKHN1	protein_coding	9383
chr1	760000	2080000	chr1	998962	1000172	ENSG00000188290	11	-1	HES4	protein_coding	1210
chr1	760000	2080000	chr1	923923	944575	ENSG00000187634	13	1	SAMD11	protein_coding	20652
chr1	760000	2080000	chr1	1081818	1116361	ENSG00000131591	18	-1	C1orf159	protein_coding	34543
chr1	760000	2080000	chr1	1097585	1104598	ENSG00000285812	1	1		lncRNA	7013
chr1	760000	2080000	chr1	1063079	1069355	ENSG00000217801	13	1		transcribed_unprocessed_pseudogene	6276
chr1	760000	2080000	chr1	1059687	1066459	ENSG00000291156	1	1		lncRNA	6772
chr1	760000	2080000	chr1	1216931	1232031	ENSG00000078808	20	-1	SDF4	protein_coding	15100
chr1	760000	2080000	chr1	1242446	1246722	ENSG00000184163	3	-1	C1QTNF12	protein_coding	4276
chr1	760000	2080000	chr1	1253909	1273864	ENSG00000160087	21	-1	UBE2J2	protein_coding	19955
chr1	760000	2080000	chr1	1275223	1280420	ENSG00000230415	1	1	LINC01786	lncRNA	5197
chr1	760000	2080000	chr1	1292390	1309609	ENSG00000131584	19	-1	ACAP3	protein_coding	17219
chr1	760000	2080000	chr1	1211326	1214153	ENSG00000186827	12	-1	TNFRSF4	protein_coding	2827
chr1	760000	2080000	chr1	1385711	1399335	ENSG00000221978	13	-1	CCNL2	protein_coding	13624
chr1	760000	2080000	chr1	1324756	1328896	ENSG00000224051	7	1	CPTP	protein_coding	4140
chr1	760000	2080000	chr1	1335276	1349418	ENSG00000107404	21	-1	DVL1	protein_coding	14142
chr1	760000	2080000	chr1	1352689	1361777	ENSG00000162576	17	-1	MXRA8	protein_coding	9088
chr1	760000	2080000	chr1	1449689	1470163	ENSG00000215915	10	1	ATAD3C	protein_coding	20474
chr1	760000	2080000	chr1	1512162	1534685	ENSG00000197785	14	1	ATAD3A	protein_coding	22523
chr1	760000	2080000	chr1	1503582	1509351	ENSG00000284740	3	1		transcribed_unprocessed_pseudogene	5769
chr1	760000	2080000	chr1	1471765	1497848	ENSG00000160072	20	1	ATAD3B	protein_coding	26083
chr1	760000	2080000	chr1	1503250	1509466	ENSG00000290916	1	1		lncRNA	6216
chr1	760000	2080000	chr1	1534778	1540624	ENSG00000205090	10	-1	TMEM240	protein_coding	5846
chr1	760000	2080000	chr1	1659529	1692795	ENSG00000189339	12	-1	SLC35E2B	protein_coding	33266
chr1	760000	2080000	chr1	1635225	1659012	ENSG00000248333	9	-1	CDK11B	protein_coding	23787
chr1	760000	2080000	chr1	1615454	1630605	ENSG00000197530	13	1	MIB2	protein_coding	15151
chr1	760000	2080000	chr1	1724512	1737251	ENSG00000227775	3	1		transcribed_processed_pseudogene	12739
chr1	760000	2080000	chr1	1751232	1780457	ENSG00000008130	15	-1	NADK	protein_coding	29225
chr1	760000	2080000	chr1	1734690	1739557	ENSG00000215790	9	-1	SLC35E2A	transcribed_unprocessed_pseudogene	4867
chr1	760000	2080000	chr1	1724838	1745992	ENSG00000290854	1	-1		lncRNA	21154
chr1	760000	2080000	chr1	1915108	1917296	ENSG00000169885	10	1	CALML6	protein_coding	2188
chr1	760000	2080000	chr1	2013213	2015639	ENSG00000233542	2	-1		lncRNA	2426
chr1	760000	2080000	chr1	916865	921016	ENSG00000223764	2	-1	LINC02593	lncRNA	4151
chr1	760000	2080000	chr1	778747	810065	ENSG00000237491	10	1	LINC01409	lncRNA	31318
chr1	760000	2080000	chr1	586071	827796	ENSG00000230021	10	-1		transcribed_processed_pseudogene	67796
chr1	760000	2080000	chr1	1434861	1442882	ENSG00000179403	12	1	VWA1	protein_coding	8021
chr1	760000	2080000	chr1	1702379	1724357	ENSG00000008128	23	-1	CDK11A	protein_coding	21978
chr1	760000	2080000	chr1	1702736	1737688	ENSG00000268575	1	-1		lncRNA	34952
chr1	760000	2080000	chr1	1541673	1574863	ENSG00000160075	12	-1	SSU72	protein_coding	33190
chr1	760000	2080000	chr1	1921951	2003837	ENSG00000142609	20	-1	CFAP74	protein_coding	81886
chr1	760000	2080000	chr1	1785285	1892292	ENSG00000078369	19	-1	GNB1	protein_coding	107007
chr1	760000	2080000	chr1	1173880	1197936	ENSG00000162571	14	1	TTLL10	protein_coding	24056
chr1	760000	2080000	chr1	1308597	1311677	ENSG00000169972	13	1	PUSL1	protein_coding	3080
chr1	760000	2080000	chr1	1020120	1056118	ENSG00000188157	15	1	AGRN	protein_coding	35998
chr1	760000	2080000	chr1	2050411	2185395	ENSG00000067606	17	1	PRKCZ	protein_coding	29589
chr1	2160000	2680000	chr1	2181794	2184389	ENSG00000182873	5	-1	PRKCZ-AS1	lncRNA	2595
chr1	2160000	2680000	chr1	2212523	2220738	ENSG00000234396	3	1		lncRNA	8215
chr1	2160000	2680000	chr1	2315040	2323085	ENSG00000287356	1	1		lncRNA	8045
chr1	2160000	2680000	chr1	2350414	2352820	ENSG00000269896	2	-1		transcribed_processed_pseudogene	2406
chr1	2160000	2680000	chr1	2363061	2363628	ENSG00000272420	1	-1		lncRNA	567
chr1	2160000	2680000	chr1	2492300	2493258	ENSG00000224387	1	-1		lncRNA	958
chr1	2160000	2680000	chr1	2493437	2494479	ENSG00000229393	1	-1		lncRNA	1042
chr1	2160000	2680000	chr1	2528745	2530263	ENSG00000197921	6	-1	HES5	protein_coding	1518
chr1	2160000	2680000	chr1	2566410	2569888	ENSG00000225931	3	1		TEC	3478
chr1	2160000	2680000	chr1	2581560	2584533	ENSG00000228037	1	1		lncRNA	2973
chr1	2160000	2680000	chr1	2585610	2586060	ENSG00000289610	2	1		lncRNA	450
chr1	2160000	2680000	chr1	2632568	2636620	ENSG00000237058	1	1	MMEL1-AS1	lncRNA	4052
chr1	2160000	2680000	chr1	2184461	2212720	ENSG00000162585	17	-1	FAAP20	protein_coding	28259
chr1	2160000	2680000	chr1	2326201	2326693	ENSG00000272161	1	-1		lncRNA	492
chr1	2160000	2680000	chr1	2403964	2413797	ENSG00000157911	11	-1	PEX10	protein_coding	9833
chr1	2160000	2680000	chr1	2391775	2405442	ENSG00000157916	20	1	RER1	protein_coding	13667
chr1	2160000	2680000	chr1	2508537	2526597	ENSG00000157881	16	-1	PANK4	protein_coding	18060
chr1	2160000	2680000	chr1	2586491	2591469	ENSG00000157870	17	1	PRXL2B	protein_coding	4978
chr1	2160000	2680000	chr1	2555639	2565382	ENSG00000157873	18	1	TNFRSF14	protein_coding	9743
chr1	2160000	2680000	chr1	2530064	2547471	ENSG00000272449	3	1		lncRNA	17407
chr1	2160000	2680000	chr1	2549920	2557031	ENSG00000238164	6	-1	TNFRSF14-AS1	lncRNA	7111
chr1	2160000	2680000	chr1	2425980	2505532	ENSG00000149527	18	1	PLCH2	protein_coding	79552
chr1	2160000	2680000	chr1	2590639	2633016	ENSG00000142606	16	-1	MMEL1	protein_coding	42377
chr1	2160000	2680000	chr1	2321253	2391707	ENSG00000116151	14	-1	MORN1	protein_coding	70454
chr1	2160000	2680000	chr1	2636986	2801693	ENSG00000215912	13	-1	TTC34	protein_coding	43014
chr1	2160000	2680000	chr1	2227388	2310213	ENSG00000157933	11	1	SKI	protein_coding	82825
chr1	2160000	2680000	chr1	2050411	2185395	ENSG00000067606	17	1	PRKCZ	protein_coding	25395
chr1	2760000	3800000	chr1	2773603	2776473	ENSG00000283259	1	1		lncRNA	2870
chr1	2760000	3800000	chr1	2811850	2812692	ENSG00000233234	1	-1		lncRNA	842
chr1	2760000	3800000	chr1	2814056	2817767	ENSG00000287396	1	1		lncRNA	3711
chr1	2760000	3800000	chr1	2814432	2814998	ENSG00000231630	1	-1		lncRNA	566
chr1	2760000	3800000	chr1	3021467	3022903	ENSG00000169717	7	1	ACTRT2	protein_coding	1436
chr1	2760000	3800000	chr1	3127975	3128035	ENSG00000283572	1	1	MIR4251	miRNA	60
chr1	2760000	3800000	chr1	3132927	3133709	ENSG00000226286	1	-1		lncRNA	782
chr1	2760000	3800000	chr1	3205988	3208664	ENSG00000279839	1	1		TEC	2676
chr1	2760000	3800000	chr1	3313052	3323149	ENSG00000287828	1	-1		lncRNA	10097
chr1	2760000	3800000	chr1	3367815	3373928	ENSG00000286518	1	-1		lncRNA	6113
chr1	2760000	3800000	chr1	3487246	3487627	ENSG00000272088	1	1		lncRNA	381
chr1	2760000	3800000	chr1	3560695	3560790	ENSG00000207776	1	-1	MIR551A	miRNA	95
chr1	2760000	3800000	chr1	3625015	3630127	ENSG00000158109	15	1	TPRG1L	protein_coding	5112
chr1	2760000	3800000	chr1	3622857	3624786	ENSG00000238260	3	-1		lncRNA	1929
chr1	2760000	3800000	chr1	3658938	3668772	ENSG00000227589	1	-1	TP73-AS3	lncRNA	9834
chr1	2760000	3800000	chr1	3712200	3714298	ENSG00000235131	1	-1	TP73-AS2	lncRNA	2098
chr1	2760000	3800000	chr1	3736943	3737103	ENSG00000276189	1	1		misc_RNA	160
chr1	2760000	3800000	chr1	3782815	3783111	ENSG00000266075	2	1	RN7SL574P	misc_RNA	296
chr1	2760000	3800000	chr1	3772749	3775982	ENSG00000235169	11	1	SMIM1	protein_coding	3233
chr1	2760000	3800000	chr1	3785008	3785538	ENSG00000272153	1	1		lncRNA	530
chr1	2760000	3800000	chr1	2768091	2784733	ENSG00000285945	1	1		lncRNA	16642
chr1	2760000	3800000	chr1	2960658	2968707	ENSG00000284745	1	-1		lncRNA	8049
chr1	2760000	3800000	chr1	3059611	3069091	ENSG00000177133	14	-1	PRDM16-DT	lncRNA	9480
chr1	2760000	3800000	chr1	3306636	3310096	ENSG00000272235	1	-1		lncRNA	3460
chr1	2760000	3800000	chr1	3454665	3481113	ENSG00000130762	15	1	ARHGEF16	protein_coding	26448
chr1	2760000	3800000	chr1	3630767	3652761	ENSG00000116213	16	-1	WRAP73	protein_coding	21994
chr1	2760000	3800000	chr1	3746460	3771645	ENSG00000162592	10	1	CCDC27	protein_coding	25185
chr1	2760000	3800000	chr1	3778559	3796498	ENSG00000130764	10	-1	LRRC47	protein_coding	17939
chr1	2760000	3800000	chr1	3735511	3747373	ENSG00000227372	12	-1	TP73-AS1	transcribed_unitary_pseudogene	11862
chr1	2760000	3800000	chr1	2636986	2801693	ENSG00000215912	13	-1	TTC34	protein_coding	41693
chr1	2760000	3800000	chr1	3652516	3736201	ENSG00000078900	15	1	TP73	protein_coding	83685
chr1	2760000	3800000	chr1	3487951	3611508	ENSG00000162591	17	-1	MEGF6	protein_coding	123557
chr1	2760000	3800000	chr1	3069168	3438621	ENSG00000142611	17	1	PRDM16	protein_coding	369453
chr1	7760000	8880000	chr1	7771296	7781432	ENSG00000049245	13	1	VAMP3	protein_coding	10136
chr1	7760000	8880000	chr1	7776383	7776775	ENSG00000269925	1	1		lncRNA	392
chr1	7760000	8880000	chr1	7942372	7942726	ENSG00000270330	1	1		processed_pseudogene	354
chr1	7760000	8880000	chr1	7982881	7982983	ENSG00000200344	1	-1	Y_RNA	misc_RNA	102
chr1	7760000	8880000	chr1	7998187	7999934	ENSG00000284716	1	-1		lncRNA	1747
chr1	7760000	8880000	chr1	8057245	8058463	ENSG00000232848	1	-1	RPL7AP18	processed_pseudogene	1218
chr1	7760000	8880000	chr1	8206434	8206597	ENSG00000200975	1	-1	RNU1-7P	snRNA	163
chr1	7760000	8880000	chr1	8218190	8220529	ENSG00000233645	1	-1		lncRNA	2339
chr1	7760000	8880000	chr1	8292157	8292263	ENSG00000251977	1	-1	RNU6-991P	snRNA	106
chr1	7760000	8880000	chr1	8328067	8328179	ENSG00000252254	1	1	Y_RNA	misc_RNA	112
chr1	7760000	8880000	chr1	8424645	8435013	ENSG00000232912	6	1	RERE-AS1	lncRNA	10368
chr1	7760000	8880000	chr1	8511795	8511919	ENSG00000221083	1	-1		snoRNA	124
chr1	7760000	8880000	chr1	8512653	8513021	ENSG00000270282	1	1		processed_pseudogene	368
chr1	7760000	8880000	chr1	8750430	8751087	ENSG00000234619	1	1	RPL7P11	processed_pseudogene	657
chr1	7760000	8880000	chr1	8786211	8786913	ENSG00000224315	2	-1	RPL7P7	processed_pseudogene	702
chr1	7760000	8880000	chr1	8796571	8796673	ENSG00000222511	2	-1	Y_RNA	misc_RNA	102
chr1	7760000	8880000	chr1	8798475	8799506	ENSG00000226545	1	1		unprocessed_pseudogene	1031
chr1	7760000	8880000	chr1	8805860	8807051	ENSG00000228423	2	-1		lncRNA	1191
chr1	7760000	8880000	chr1	8831007	8831375	ENSG00000229716	2	1	RPL23AP19	processed_pseudogene	368
chr1	7760000	8880000	chr1	8866502	8866590	ENSG00000274258	1	-1	MIR6728	miRNA	88
chr1	7760000	8880000	chr1	8878835	8879894	ENSG00000230679	1	1	ENO1-AS1	lncRNA	1059
chr1	7760000	8880000	chr1	7784291	7845177	ENSG00000049246	15	1	PER3	protein_coding	60886
chr1	7760000	8880000	chr1	7810242	7827342	ENSG00000236266	1	-1		lncRNA	17100
chr1	7760000	8880000	chr1	7843083	7853512	ENSG00000049247	14	-1	UTS2	protein_coding	10429
chr1	7760000	8880000	chr1	7915871	7943165	ENSG00000049249	10	-1	TNFRSF9	protein_coding	27294
chr1	7760000	8880000	chr1	7954291	7985505	ENSG00000116288	13	1	PARK7	protein_coding	31214
chr1	7760000	8880000	chr1	8026738	8122702	ENSG00000238290	1	1	ERRFI1-DT	lncRNA	95964
chr1	7760000	8880000	chr1	8004404	8026309	ENSG00000116285	13	-1	ERRFI1	protein_coding	21905
chr1	7760000	8880000	chr1	8189824	8192770	ENSG00000229305	1	1		processed_pseudogene	2946
chr1	7760000	8880000	chr1	8191692	8194926	ENSG00000288816	1	1		lncRNA	3234
chr1	7760000	8880000	chr1	8201518	8215210	ENSG00000227634	3	1	LINC01714	lncRNA	13692
chr1	7760000	8880000	chr1	8318114	8344167	ENSG00000162426	16	1	SLC45A1	protein_coding	26053
chr1	7760000	8880000	chr1	8861000	8879190	ENSG00000074800	16	-1	ENO1	protein_coding	18190
chr1	7760000	8880000	chr1	7991134	8005312	ENSG00000284747	1	1		lncRNA	14178
chr1	7760000	8880000	chr1	6785454	7769706	ENSG00000171735	21	1	CAMTA1	protein_coding	9706
chr1	7760000	8880000	chr1	8352397	8848921	ENSG00000142599	20	-1	RERE	protein_coding	496524
chr1	8880000	9600000	chr1	8883427	8883533	ENSG00000201725	1	-1	RNU6-304P	snRNA	106
chr1	8880000	9600000	chr1	8893409	8894151	ENSG00000238249	2	1	HMGN2P17	processed_pseudogene	742
chr1	8880000	9600000	chr1	8907393	8907744	ENSG00000232208	2	-1		processed_pseudogene	351
chr1	8880000	9600000	chr1	8909742	8909904	ENSG00000232663	2	1		processed_pseudogene	162
chr1	8880000	9600000	chr1	8970490	8971244	ENSG00000290109	1	-1		lncRNA	754
chr1	8880000	9600000	chr1	8979576	8979874	ENSG00000265141	2	-1	RN7SL451P	misc_RNA	298
chr1	8880000	9600000	chr1	9082696	9082879	ENSG00000252404	1	1		scaRNA	183
chr1	8880000	9600000	chr1	9151668	9151777	ENSG00000284357	1	-1	MIR34A	miRNA	109
chr1	8880000	9600000	chr1	9162322	9162945	ENSG00000289914	1	-1		lncRNA	623
chr1	8880000	9600000	chr1	9421098	9422862	ENSG00000284652	1	-1		lncRNA	1764
chr1	8880000	9600000	chr1	9437669	9437778	ENSG00000252956	1	-1	RNA5SP40	rRNA_pseudogene	109
chr1	8880000	9600000	chr1	9576427	9576985	ENSG00000231181	1	1		processed_pseudogene	558
chr1	8880000	9600000	chr1	9002973	9026423	ENSG00000197241	4	-1	SLC2A7	protein_coding	23450
chr1	8880000	9600000	chr1	8945867	8975092	ENSG00000131686	15	1	CA6	protein_coding	29225
chr1	8880000	9600000	chr1	9100305	9129102	ENSG00000180758	12	-1	GPR157	protein_coding	28797
chr1	8880000	9600000	chr1	9234774	9271337	ENSG00000049239	13	1	H6PD	protein_coding	36563
chr1	8880000	9600000	chr1	9182004	9196284	ENSG00000234546	5	1	LNCTAM34A	lncRNA	14280
chr1	8880000	9600000	chr1	9501092	9503471	ENSG00000235263	1	-1		lncRNA	2379
chr1	8880000	9600000	chr1	9588911	9614877	ENSG00000188807	13	1	TMEM201	protein_coding	11089
chr1	8880000	9600000	chr1	9292894	9369532	ENSG00000171621	14	1	SPSB1	protein_coding	76638
chr1	8880000	9600000	chr1	9035106	9088478	ENSG00000142583	18	-1	SLC2A5	protein_coding	53372
chr1	8880000	9600000	chr1	9148011	9198906	ENSG00000228526	8	-1	MIR34AHG	lncRNA	50895
chr1	8880000	9600000	chr1	9539465	9585173	ENSG00000171612	7	1	SLC25A33	protein_coding	45708
chr1	8880000	9600000	chr1	9425094	9440564	ENSG00000284693	2	-1	LINC02606	lncRNA	15470
chr1	13320000	15520000	chr1	13324039	13324518	ENSG00000228229	2	1		lncRNA	479
chr1	13320000	15520000	chr1	13341892	13347134	ENSG00000204481	8	-1	PRAMEF14	protein_coding	5242
chr1	13320000	15520000	chr1	13389632	13392629	ENSG00000204479	4	1	PRAMEF17	protein_coding	2997
chr1	13320000	15520000	chr1	13513220	13516270	ENSG00000259961	1	1		lncRNA	3050
chr1	13320000	15520000	chr1	13555001	13555694	ENSG00000215909	3	1	BRWD1P1	processed_pseudogene	693
chr1	13320000	15520000	chr1	13623184	13623284	ENSG00000222952	1	-1	RNA5SP41	rRNA_pseudogene	100
chr1	13320000	15520000	chr1	13657311	13659910	ENSG00000237445	2	-1		lncRNA	2599
chr1	13320000	15520000	chr1	13696070	13696199	ENSG00000253085	1	-1		scaRNA	129
chr1	13320000	15520000	chr1	13757778	13758465	ENSG00000289380	1	1		lncRNA	687
chr1	13320000	15520000	chr1	14124233	14124335	ENSG00000252151	1	-1	RNU6-1265P	snRNA	102
chr1	13320000	15520000	chr1	14692129	14692613	ENSG00000235829	1	-1	TBCAP2	processed_pseudogene	484
chr1	13320000	15520000	chr1	14774469	14777727	ENSG00000287756	1	-1		lncRNA	3258
chr1	13320000	15520000	chr1	15164344	15171317	ENSG00000204464	7	-1	TMEM51-AS2	lncRNA	6973
chr1	13320000	15520000	chr1	15191828	15192845	ENSG00000215720	4	-1	MFFP1	processed_pseudogene	1017
chr1	13320000	15520000	chr1	15226373	15227549	ENSG00000278480	1	1	ZBTB2P1	processed_pseudogene	1176
chr1	13320000	15520000	chr1	15402979	15409433	ENSG00000228140	2	-1	EFHD2-AS1	lncRNA	6454
chr1	13320000	15520000	chr1	15438442	15449242	ENSG00000162438	12	1	CTRC	protein_coding	10800
chr1	13320000	15520000	chr1	13315581	13322598	ENSG00000204501	7	1	PRAMEF15	protein_coding	2598
chr1	13320000	15520000	chr1	13410450	13421328	ENSG00000204478	11	1	PRAMEF20	protein_coding	10878
chr1	13320000	15520000	chr1	13583465	13617957	ENSG00000162493	17	1	PDPN	protein_coding	34492
chr1	13320000	15520000	chr1	15111815	15153618	ENSG00000175147	13	-1	TMEM51-AS1	lncRNA	41803
chr1	13320000	15520000	chr1	15409888	15430339	ENSG00000142634	13	1	EFHD2	protein_coding	20451
chr1	13320000	15520000	chr1	15490832	15526534	ENSG00000132906	18	-1	CASP9	protein_coding	29168
chr1	13320000	15520000	chr1	13474973	13514003	ENSG00000162494	6	-1	LRRC38	protein_coding	39030
chr1	13320000	15520000	chr1	13368431	13371947	ENSG00000204480	9	-1	PRAMEF19	protein_coding	3516
chr1	13320000	15520000	chr1	14338825	14419973	ENSG00000234593	3	-1	KAZN-AS1	lncRNA	81148
chr1	13320000	15520000	chr1	14221887	14304445	ENSG00000231606	2	-1		lncRNA	82558
chr1	13320000	15520000	chr1	13700188	13825079	ENSG00000116731	23	1	PRDM2	protein_coding	124891
chr1	13320000	15520000	chr1	15152532	15220478	ENSG00000171729	14	1	TMEM51	protein_coding	67946
chr1	13320000	15520000	chr1	15326680	15343876	ENSG00000233485	1	-1	FHAD1-AS1	lncRNA	17196
chr1	13320000	15520000	chr1	15334166	15335464	ENSG00000236045	1	-1		lncRNA	1298
chr1	13320000	15520000	chr1	15236521	15400283	ENSG00000142621	21	1	FHAD1	protein_coding	163762
chr1	13320000	15520000	chr1	15456728	15472091	ENSG00000142615	8	1	CELA2A	protein_coding	15363
chr1	13320000	15520000	chr1	15465909	15491395	ENSG00000215704	10	1	CELA2B	protein_coding	25486
chr1	13320000	15520000	chr1	13892792	15118043	ENSG00000189337	17	1	KAZN	protein_coding	1225251
chr1	15760000	16560000	chr1	15792796	15793285	ENSG00000224321	1	1	RPL12P14	processed_pseudogene	489
chr1	15760000	16560000	chr1	15807169	15809348	ENSG00000233954	7	-1	UQCRHL	protein_coding	2179
chr1	15760000	16560000	chr1	15828232	15828669	ENSG00000178715	8	1		processed_pseudogene	437
chr1	15760000	16560000	chr1	15917698	15917908	ENSG00000270620	1	-1		unprocessed_pseudogene	210
chr1	15760000	16560000	chr1	15969632	15970194	ENSG00000234607	2	1		processed_pseudogene	562
chr1	15760000	16560000	chr1	15988182	15988441	ENSG00000231353	1	1		unprocessed_pseudogene	259
chr1	15760000	16560000	chr1	15989140	15989375	ENSG00000275503	1	-1		processed_pseudogene	235
chr1	15760000	16560000	chr1	16006160	16006671	ENSG00000233078	1	-1		lncRNA	511
chr1	15760000	16560000	chr1	16014028	16019594	ENSG00000173641	18	-1	HSPB7	protein_coding	5566
chr1	15760000	16560000	chr1	16159266	16161883	ENSG00000224621	1	1		lncRNA	2617
chr1	15760000	16560000	chr1	16155176	16158148	ENSG00000227959	2	1	EPHA2-AS1	lncRNA	2972
chr1	15760000	16560000	chr1	16197854	16198357	ENSG00000234166	1	1	ARHGEF19-AS1	lncRNA	503
chr1	15760000	16560000	chr1	16215907	16217425	ENSG00000291077	1	-1		lncRNA	1518
chr1	15760000	16560000	chr1	16228674	16231335	ENSG00000288398	1	-1		lncRNA	2661
chr1	15760000	16560000	chr1	16241213	16241398	ENSG00000233929	1	-1	MT1XP1	processed_pseudogene	185
chr1	15760000	16560000	chr1	16369150	16369530	ENSG00000226457	1	-1	RPL22P3	processed_pseudogene	380
chr1	15760000	16560000	chr1	16514122	16514285	ENSG00000206652	1	-1	RNU1-1	snRNA	163
chr1	15760000	16560000	chr1	16520694	16521796	ENSG00000224174	2	1		lncRNA	1102
chr1	15760000	16560000	chr1	16533886	16535649	ENSG00000233421	5	-1	LINC01783	lncRNA	1763
chr1	15760000	16560000	chr1	16534081	16534224	ENSG00000277344	1	-1	RNU1-6P	snRNA	143
chr1	15760000	16560000	chr1	16548651	16552531	ENSG00000225710	1	-1	PDE4DIPP8	unprocessed_pseudogene	3880
chr1	15760000	16560000	chr1	15756607	15786594	ENSG00000162458	13	1	FBLIM1	protein_coding	26594
chr1	15760000	16560000	chr1	15834474	15848147	ENSG00000179743	4	-1	SPEN-AS1	lncRNA	13673
chr1	15760000	16560000	chr1	15941869	15976132	ENSG00000116809	12	-1	ZBTB17	protein_coding	34263
chr1	15760000	16560000	chr1	16004236	16008807	ENSG00000183888	4	1	SRARP	protein_coding	4571
chr1	15760000	16560000	chr1	16018875	16034050	ENSG00000186510	12	1	CLCNKA	protein_coding	15175
chr1	15760000	16560000	chr1	16035178	16040029	ENSG00000232456	1	-1	FAM131C2P	unprocessed_pseudogene	4851
chr1	15760000	16560000	chr1	16057769	16073651	ENSG00000185519	9	-1	FAM131C	protein_coding	15882
chr1	15760000	16560000	chr1	16040252	16057311	ENSG00000184908	20	1	CLCNKB	protein_coding	17059
chr1	15760000	16560000	chr1	16124337	16156069	ENSG00000142627	13	-1	EPHA2	protein_coding	31732
chr1	15760000	16560000	chr1	16197854	16212652	ENSG00000142632	17	-1	ARHGEF19	protein_coding	14798
chr1	15760000	16560000	chr1	16231692	16237183	ENSG00000132881	12	-1	CPLANE2	protein_coding	5491
chr1	15760000	16560000	chr1	16216469	16228027	ENSG00000237276	10	-1	ANO7L1	transcribed_unprocessed_pseudogene	11558
chr1	15760000	16560000	chr1	16460948	16468481	ENSG00000226029	1	1	LINC01772	lncRNA	7533
chr1	15760000	16560000	chr1	16387117	16437424	ENSG00000187144	11	-1	SPATA21	protein_coding	50307
chr1	15760000	16560000	chr1	16474396	16491307	ENSG00000080947	16	-1	CROCCP3	transcribed_unprocessed_pseudogene	16911
chr1	15760000	16560000	chr1	16440721	16460078	ENSG00000157191	20	1	NECAP2	protein_coding	19357
chr1	15760000	16560000	chr1	16467436	16499257	ENSG00000290842	1	-1	CROCCP3	lncRNA	31821
chr1	15760000	16560000	chr1	16246840	16352480	ENSG00000037637	11	-1	FBXO42	protein_coding	105640
chr1	15760000	16560000	chr1	16352575	16398145	ENSG00000055070	17	1	SZRD1	protein_coding	45570
chr1	15760000	16560000	chr1	15989871	15994751	ENSG00000224966	4	1	TBC1D3P6	unprocessed_pseudogene	4880
chr1	15760000	16560000	chr1	16514645	16515754	ENSG00000261135	1	1		lncRNA	1109
chr1	15760000	16560000	chr1	16515034	16521788	ENSG00000285853	1	1		lncRNA	6754
chr1	15760000	16560000	chr1	15836095	15940456	ENSG00000065526	13	1	SPEN	protein_coding	104361
chr1	16560000	18880000	chr1	16617391	16617729	ENSG00000271732	1	1		lncRNA	338
chr1	16560000	18880000	chr1	16642767	16643109	ENSG00000283773	1	-1		transcribed_unprocessed_pseudogene	342
chr1	16560000	18880000	chr1	16666785	16666948	ENSG00000207513	1	-1	RNU1-3	snRNA	163
chr1	16560000	18880000	chr1	16685621	16686055	ENSG00000236698	1	-1	EIF1AXP1	processed_pseudogene	434
chr1	16560000	18880000	chr1	16687339	16692309	ENSG00000290849	1	-1		lncRNA	4970
chr1	16560000	18880000	chr1	16681097	16688749	ENSG00000280114	1	-1		unprocessed_pseudogene	7652
chr1	16560000	18880000	chr1	16701546	16705594	ENSG00000279151	1	1		lncRNA	4048
chr1	16560000	18880000	chr1	16740516	16740679	ENSG00000207389	1	1	RNU1-4	snRNA	163
chr1	16560000	18880000	chr1	16750233	16750964	ENSG00000227684	3	1	CROCCP4	transcribed_unprocessed_pseudogene	731
chr1	16560000	18880000	chr1	16851257	16853129	ENSG00000223643	6	-1		lncRNA	1872
chr1	16560000	18880000	chr1	16858949	16859021	ENSG00000263811	1	-1	MIR3675	miRNA	72
chr1	16560000	18880000	chr1	16873708	16873851	ENSG00000277234	1	1	RNU1-5P	snRNA	143
chr1	16560000	18880000	chr1	16889095	16889602	ENSG00000235241	1	1		processed_pseudogene	507
chr1	16560000	18880000	chr1	16887577	16889725	ENSG00000238142	4	-1		lncRNA	2148
chr1	16560000	18880000	chr1	16895980	16896143	ENSG00000207005	1	1	RNU1-2	snRNA	163
chr1	16560000	18880000	chr1	16904339	16904776	ENSG00000272426	1	-1		lncRNA	437
chr1	16560000	18880000	chr1	16905199	16905396	ENSG00000290122	1	1		lncRNA	197
chr1	16560000	18880000	chr1	16974502	16980632	ENSG00000117122	14	-1	MFAP2	protein_coding	6130
chr1	16560000	18880000	chr1	16976302	16977792	ENSG00000286898	1	1		lncRNA	1490
chr1	16560000	18880000	chr1	17189783	17197617	ENSG00000204362	6	1	LINC02783	lncRNA	7834
chr1	16560000	18880000	chr1	17193232	17201733	ENSG00000282843	1	-1		lncRNA	8501
chr1	16560000	18880000	chr1	17277889	17277975	ENSG00000266634	1	1	MIR3972	miRNA	86
chr1	16560000	18880000	chr1	17406760	17407382	ENSG00000227751	1	1	RCC2-AS1	lncRNA	622
chr1	16560000	18880000	chr1	17439186	17439328	ENSG00000290096	1	-1		lncRNA	142
chr1	16560000	18880000	chr1	18109389	18115861	ENSG00000280222	1	1		TEC	6472
chr1	16560000	18880000	chr1	18385829	18388514	ENSG00000225387	1	1		lncRNA	2685
chr1	16560000	18880000	chr1	18513118	18513383	ENSG00000235282	3	1	DYNLL1P3	processed_pseudogene	265
chr1	16560000	18880000	chr1	18595414	18595636	ENSG00000225478	2	1		processed_pseudogene	222
chr1	16560000	18880000	chr1	16562319	16613562	ENSG00000219481	11	-1	NBPF1	protein_coding	51243
chr1	16560000	18880000	chr1	16618253	16644686	ENSG00000291072	1	-1	CROCCP2	lncRNA	26433
chr1	16560000	18880000	chr1	16656879	16667524	ENSG00000282143	1	1		lncRNA	10645
chr1	16560000	18880000	chr1	16739938	16750589	ENSG00000282740	1	-1		lncRNA	10651
chr1	16560000	18880000	chr1	16757232	16764480	ENSG00000186715	12	-1	MST1L	transcribed_unprocessed_pseudogene	7248
chr1	16560000	18880000	chr1	16692280	16720157	ENSG00000268869	7	-1	ESPNP	transcribed_unprocessed_pseudogene	27877
chr1	16560000	18880000	chr1	16740280	16750968	ENSG00000290850	1	1		lncRNA	10688
chr1	16560000	18880000	chr1	16754910	16770237	ENSG00000290851	1	-1		lncRNA	15327
chr1	16560000	18880000	chr1	16855407	16859284	ENSG00000230239	1	1	PDE4DIPP9	unprocessed_pseudogene	3877
chr1	16560000	18880000	chr1	16870945	16883659	ENSG00000228549	5	1		lncRNA	12714
chr1	16560000	18880000	chr1	16978926	17005091	ENSG00000226526	1	1		lncRNA	26165
chr1	16560000	18880000	chr1	16985958	17011928	ENSG00000159363	19	-1	ATP13A2	protein_coding	25970
chr1	16560000	18880000	chr1	17005068	17011757	ENSG00000288636	1	-1		protein_coding	6689
chr1	16560000	18880000	chr1	17066761	17119451	ENSG00000117115	13	-1	PADI2	protein_coding	52690
chr1	16560000	18880000	chr1	17205128	17246007	ENSG00000142623	11	1	PADI1	protein_coding	40879
chr1	16560000	18880000	chr1	17249098	17284233	ENSG00000142619	4	1	PADI3	protein_coding	35135
chr1	16560000	18880000	chr1	17372196	17401699	ENSG00000276747	1	1	PADI6	protein_coding	29503
chr1	16560000	18880000	chr1	17308195	17364004	ENSG00000159339	13	1	PADI4	protein_coding	55809
chr1	16560000	18880000	chr1	17717625	17749978	ENSG00000236648	2	1	LINC02810	lncRNA	32353
chr1	16560000	18880000	chr1	18015712	18045612	ENSG00000284653	1	1		lncRNA	29900
chr1	16560000	18880000	chr1	18065657	18074412	ENSG00000261781	1	1	LINC01654	lncRNA	8755
chr1	16560000	18880000	chr1	18166929	18179346	ENSG00000230035	2	-1	IGSF21-AS1	lncRNA	12417
chr1	16560000	18880000	chr1	18839599	18859660	ENSG00000179002	6	-1	TAS1R2	protein_coding	20061
chr1	16560000	18880000	chr1	16645622	16650289	ENSG00000186301	8	1	MST1P2	unprocessed_pseudogene	4667
chr1	16560000	18880000	chr1	16618969	16657232	ENSG00000215908	12	-1	CROCCP2	transcribed_unprocessed_pseudogene	38263
chr1	16560000	18880000	chr1	17406760	17439677	ENSG00000179051	14	-1	RCC2	protein_coding	32917
chr1	16560000	18880000	chr1	17539698	17697874	ENSG00000074964	17	1	ARHGEF10L	protein_coding	158176
chr1	16560000	18880000	chr1	17018664	17054032	ENSG00000117118	11	-1	SDHB	protein_coding	35368
chr1	16560000	18880000	chr1	18630846	18748866	ENSG00000009709	12	1	PAX7	protein_coding	118020
chr1	16560000	18880000	chr1	18107798	18378483	ENSG00000117154	12	1	IGSF21	protein_coding	270685
chr1	16560000	18880000	chr1	18480930	18485974	ENSG00000179023	9	1	KLHDC7A	protein_coding	5044
chr1	16560000	18880000	chr1	18871430	18902724	ENSG00000159423	17	-1	ALDH4A1	protein_coding	8570
chr1	16560000	18880000	chr1	17755333	17827063	ENSG00000117148	8	1	ACTL8	protein_coding	71730
chr1	16560000	18880000	chr1	16740273	16972964	ENSG00000058453	17	1	CROCC	protein_coding	232691
chr1	22040000	22640000	chr1	22059197	22064199	ENSG00000230068	2	1	CDC42-IT1	lncRNA	5002
chr1	22040000	22640000	chr1	22068340	22068827	ENSG00000271428	1	-1	MPHOSPH6P1	processed_pseudogene	487
chr1	22040000	22640000	chr1	22266239	22266300	ENSG00000266564	1	1	MIR4418	miRNA	61
chr1	22040000	22640000	chr1	22322840	22323331	ENSG00000234397	3	-1	PPIAP34	processed_pseudogene	491
chr1	22040000	22640000	chr1	22364630	22366482	ENSG00000279625	1	-1		TEC	1852
chr1	22040000	22640000	chr1	22517474	22519708	ENSG00000237200	1	1	ZBTB40-IT1	lncRNA	2234
chr1	22040000	22640000	chr1	22633258	22633366	ENSG00000276835	2	-1	MIR6127	miRNA	108
chr1	22040000	22640000	chr1	22635077	22639678	ENSG00000173372	18	1	C1QA	protein_coding	4601
chr1	22040000	22640000	chr1	22028317	22052927	ENSG00000285752	1	-1	CDC42-AS1	lncRNA	12927
chr1	22040000	22640000	chr1	22117313	22143969	ENSG00000162552	15	-1	WNT4	protein_coding	26656
chr1	22040000	22640000	chr1	22025142	22092943	ENSG00000289694	1	1		protein_coding	52943
chr1	22040000	22640000	chr1	22052627	22101360	ENSG00000070831	18	1	CDC42	protein_coding	48733
chr1	22040000	22640000	chr1	22428838	22531157	ENSG00000184677	18	1	ZBTB40	protein_coding	102319
chr1	22040000	22640000	chr1	22563489	22603595	ENSG00000070886	12	1	EPHA8	protein_coding	40106
chr1	22040000	22640000	chr1	22636506	22644067	ENSG00000289692	1	1		protein_coding	3494
chr1	22040000	22640000	chr1	22142850	22157401	ENSG00000285873	1	1		lncRNA	14551
chr1	22960000	23760000	chr1	23010834	23019100	ENSG00000227868	7	-1	TEX46	protein_coding	8266
chr1	22960000	23760000	chr1	23044305	23044372	ENSG00000263793	1	1	MIR3115	miRNA	67
chr1	22960000	23760000	chr1	23057858	23057934	ENSG00000266802	1	-1		miRNA	76
chr1	22960000	23760000	chr1	23140325	23141142	ENSG00000229010	1	1		processed_pseudogene	817
chr1	22960000	23760000	chr1	23162704	23162810	ENSG00000206935	1	1	RNU6-514P	snRNA	106
chr1	22960000	23760000	chr1	23163953	23164053	ENSG00000252578	1	1	RNU6-135P	snRNA	100
chr1	22960000	23760000	chr1	23167098	23167889	ENSG00000289014	1	-1		lncRNA	791
chr1	22960000	23760000	chr1	23244765	23245224	ENSG00000215381	3	1	RPL29P6	processed_pseudogene	459
chr1	22960000	23760000	chr1	23370254	23370346	ENSG00000201405	1	1	Y_RNA	misc_RNA	92
chr1	22960000	23760000	chr1	23378380	23379029	ENSG00000271420	1	-1		lncRNA	649
chr1	22960000	23760000	chr1	23368939	23371839	ENSG00000249087	9	1	ZNF436-AS1	lncRNA	2900
chr1	22960000	23760000	chr1	23410832	23412146	ENSG00000232482	2	1		processed_pseudogene	1314
chr1	22960000	23760000	chr1	23549139	23550915	ENSG00000235052	1	-1		lncRNA	1776
chr1	22960000	23760000	chr1	23557926	23559501	ENSG00000117318	9	-1	ID3	protein_coding	1575
chr1	22960000	23760000	chr1	23691742	23696835	ENSG00000142676	14	1	RPL11	protein_coding	5093
chr1	22960000	23760000	chr1	22953043	22972866	ENSG00000215906	9	-1	LACTBL1	protein_coding	12866
chr1	22960000	23760000	chr1	23084030	23177808	ENSG00000169641	15	-1	LUZP1	protein_coding	93778
chr1	22960000	23760000	chr1	23281307	23287488	ENSG00000261326	4	-1	LINC01355	lncRNA	6181
chr1	22960000	23760000	chr1	23297797	23302866	ENSG00000284726	1	1		lncRNA	5069
chr1	22960000	23760000	chr1	23359448	23369836	ENSG00000125945	15	-1	ZNF436	protein_coding	10388
chr1	22960000	23760000	chr1	23380909	23424748	ENSG00000204219	11	-1	TCEA3	protein_coding	43839
chr1	22960000	23760000	chr1	23506438	23531233	ENSG00000007968	7	-1	E2F2	protein_coding	24795
chr1	22960000	23760000	chr1	23670294	23680259	ENSG00000229239	2	1	EEF1A1P48	unprocessed_pseudogene	9965
chr1	22960000	23760000	chr1	23743448	23762059	ENSG00000011007	13	1	ELOA	protein_coding	16552
chr1	22960000	23760000	chr1	23576436	23593621	ENSG00000285802	1	-1		lncRNA	17185
chr1	22960000	23760000	chr1	23428563	23484568	ENSG00000088280	20	-1	ASAP3	protein_coding	56005
chr1	22960000	23760000	chr1	23581495	23640568	ENSG00000197880	10	1	MDS2	lncRNA	59073
chr1	22960000	23760000	chr1	23706901	23778325	ENSG00000236810	8	-1	ELOA-AS1	lncRNA	53099
chr1	22960000	23760000	chr1	23303771	23344336	ENSG00000125944	21	-1	HNRNPR	protein_coding	40565
chr1	22960000	23760000	chr1	23191895	23217502	ENSG00000179546	5	-1	HTR1D	protein_coding	25607
chr1	22960000	23760000	chr1	23020147	23088058	ENSG00000240553	1	-1		lncRNA	67911
chr1	22960000	23760000	chr1	23019443	23083689	ENSG00000004487	18	1	KDM1A	protein_coding	64246
chr1	25840000	26480000	chr1	25859580	25863420	ENSG00000236528	3	1		lncRNA	3840
chr1	25840000	26480000	chr1	25877496	25877605	ENSG00000207302	1	1	Y_RNA	misc_RNA	109
chr1	25840000	26480000	chr1	25887360	25887610	ENSG00000229786	1	1	SNRPFP2	processed_pseudogene	250
chr1	25840000	26480000	chr1	25888970	25889109	ENSG00000223624	1	1		processed_pseudogene	139
chr1	25840000	26480000	chr1	25906362	25906454	ENSG00000283938	1	-1	MIR3917	miRNA	92
chr1	25840000	26480000	chr1	25964197	25964300	ENSG00000207237	1	1	RNU6-110P	snRNA	103
chr1	25840000	26480000	chr1	26006216	26006299	ENSG00000252691	1	1		scaRNA	83
chr1	25840000	26480000	chr1	26006006	26006130	ENSG00000252190	1	1		scaRNA	124
chr1	25840000	26480000	chr1	26046665	26049099	ENSG00000284309	1	1		lncRNA	2434
chr1	25840000	26480000	chr1	26037252	26046118	ENSG00000158014	15	-1	SLC30A2	protein_coding	8866
chr1	25840000	26480000	chr1	26159079	26163962	ENSG00000197245	6	1	FAM110D	protein_coding	4883
chr1	25840000	26480000	chr1	26169908	26170873	ENSG00000142684	9	1	ZNF593	protein_coding	965
chr1	25840000	26480000	chr1	26169516	26171832	ENSG00000236782	8	-1	ZNF593OS	protein_coding	2316
chr1	25840000	26480000	chr1	26218581	26220476	ENSG00000278572	1	-1		unprocessed_pseudogene	1895
chr1	25840000	26480000	chr1	26263041	26263398	ENSG00000270733	1	-1		processed_pseudogene	357
chr1	25840000	26480000	chr1	26280086	26281522	ENSG00000142669	15	1	SH3BGRL3	protein_coding	1436
chr1	25840000	26480000	chr1	26317958	26320523	ENSG00000169442	9	1	CD52	protein_coding	2565
chr1	25840000	26480000	chr1	26326688	26327033	ENSG00000225854	2	1		processed_pseudogene	345
chr1	25840000	26480000	chr1	26454653	26455187	ENSG00000223583	1	-1	RPL17P9	processed_pseudogene	534
chr1	25840000	26480000	chr1	26462756	26468014	ENSG00000225891	2	-1	DHDDS-AS1	lncRNA	5258
chr1	25840000	26480000	chr1	25831913	25859458	ENSG00000127423	11	-1	AUNIP	protein_coding	19458
chr1	25840000	26480000	chr1	25861484	25875708	ENSG00000182749	6	-1	PAQR7	protein_coding	14224
chr1	25840000	26480000	chr1	25884181	25906991	ENSG00000117632	23	-1	STMN1	protein_coding	22810
chr1	25840000	26480000	chr1	25959767	25998117	ENSG00000158006	14	-1	PAFAH2	protein_coding	38350
chr1	25840000	26480000	chr1	26019884	26036464	ENSG00000158008	10	1	EXTL1	protein_coding	16580
chr1	25840000	26480000	chr1	26051301	26068436	ENSG00000158022	7	-1	TRIM63	protein_coding	17135
chr1	25840000	26480000	chr1	26111165	26125555	ENSG00000175087	10	1	PDIK1L	protein_coding	14390
chr1	25840000	26480000	chr1	26177484	26189884	ENSG00000142675	18	1	CNKSR1	protein_coding	12400
chr1	25840000	26480000	chr1	26164101	26168963	ENSG00000282872	2	-1	C1orf232	protein_coding	4862
chr1	25840000	26480000	chr1	26190561	26202968	ENSG00000188782	9	1	CATSPER4	protein_coding	12407
chr1	25840000	26480000	chr1	26234200	26278808	ENSG00000130695	16	1	CEP85	protein_coding	44608
chr1	25840000	26480000	chr1	26281328	26318363	ENSG00000158062	21	-1	UBXN11	protein_coding	37035
chr1	25840000	26480000	chr1	26361634	26374522	ENSG00000176083	18	-1	ZNF683	protein_coding	12888
chr1	25840000	26480000	chr1	26410817	26429728	ENSG00000131914	11	1	LIN28A	protein_coding	18911
chr1	25840000	26480000	chr1	26432282	26471306	ENSG00000117682	18	1	DHDDS	protein_coding	39024
chr1	25840000	26480000	chr1	26321698	26360080	ENSG00000176092	17	-1	CRYBG2	protein_coding	38382
chr1	25840000	26480000	chr1	26472440	26476642	ENSG00000198830	12	1	HMGN2	protein_coding	4202
chr1	25840000	26480000	chr1	26209741	26229844	ENSG00000236155	8	1	ZPLD2P	transcribed_unitary_pseudogene	20103
chr1	26920000	27680000	chr1	26980165	26980975	ENSG00000172746	6	1	RPL12P13	unprocessed_pseudogene	810
chr1	26920000	27680000	chr1	26983628	26984024	ENSG00000224064	1	1	RPL32P6	processed_pseudogene	396
chr1	26920000	27680000	chr1	26985897	26986340	ENSG00000225294	1	-1	OSTCP2	processed_pseudogene	443
chr1	26920000	27680000	chr1	27005020	27012850	ENSG00000158246	8	-1	TENT5B	protein_coding	7830
chr1	26920000	27680000	chr1	27176751	27177277	ENSG00000229985	2	1		processed_pseudogene	526
chr1	26920000	27680000	chr1	27200834	27201473	ENSG00000214973	3	-1	CHCHD3P3	processed_pseudogene	639
chr1	26920000	27680000	chr1	27206930	27207796	ENSG00000225159	1	1	NPM1P39	processed_pseudogene	866
chr1	26920000	27680000	chr1	27211265	27211484	ENSG00000225990	2	1	SNRPEP7	processed_pseudogene	219
chr1	26920000	27680000	chr1	27255464	27255567	ENSG00000252098	1	-1	Y_RNA	misc_RNA	103
chr1	26920000	27680000	chr1	27311240	27311838	ENSG00000243659	1	1		processed_pseudogene	598
chr1	26920000	27680000	chr1	27325219	27325325	ENSG00000206888	1	1	RNU6-48P	snRNA	106
chr1	26920000	27680000	chr1	27325329	27325796	ENSG00000241547	1	1	ACTG1P20	processed_pseudogene	467
chr1	26920000	27680000	chr1	27369110	27374824	ENSG00000142748	14	-1	FCN3	protein_coding	5714
chr1	26920000	27680000	chr1	27379176	27383333	ENSG00000174950	11	-1	CD164L2	protein_coding	4157
chr1	26920000	27680000	chr1	27389468	27390145	ENSG00000231207	1	1		processed_pseudogene	677
chr1	26920000	27680000	chr1	27457198	27459582	ENSG00000241169	1	1		lncRNA	2384
chr1	26920000	27680000	chr1	27525805	27530561	ENSG00000237429	1	1		lncRNA	4756
chr1	26920000	27680000	chr1	27649419	27649610	ENSG00000235912	1	1		processed_pseudogene	191
chr1	26920000	27680000	chr1	27660328	27666279	ENSG00000233975	2	-1	LINC02574	lncRNA	5951
chr1	26920000	27680000	chr1	27666064	27672212	ENSG00000126709	16	-1	IFI6	protein_coding	6148
chr1	26920000	27680000	chr1	27675603	27675709	ENSG00000206767	1	-1	RNU6-949P	snRNA	106
chr1	26920000	27680000	chr1	26900238	26946871	ENSG00000090273	14	1	NUDC	protein_coding	26871
chr1	26920000	27680000	chr1	26949562	26960468	ENSG00000175707	10	-1	KDF1	protein_coding	10906
[truncated: 10,182 more rows]

## Sheet: CRC8
chr22	21520000	23960000	chr22	22895375	22895834	ENSG00000211675	2	1	IGLC1	IG_C_gene	459
[truncated: 8,954 more rows]

[truncated: 18 more sheets: Foglio4, Foglio5, crc1 stitched table, crc2 stitched table, crc3 stitched table, crc4 stitched table, crc5 stitched table, crc6 stitched table, crc7 stiched table, crc8 stiched table, crc1b stiched table, crc2b stiched table, 3b stiched table, crc4b stiched table, crc5b stiched table, crc6b stiched table, crc7b stiched table, crc8b stiched table]
