# Supplementary material for: Super-enhancers reorganization controls re-sensitization of oxaliplatin-resistant FBXW7-mutated colorectal cancer
Source: Research Square preprint supplement (doi:10.21203/rs.3.rs-4758082/v1), 2024-07-30
Supplement: Supplementary file 10 [file d83df36b449d107359404429.xlsx]

## Sheet: Foglio1
Genes repressed after HDAC4 silencing associated to lost SEs	Genes induced after HDAC4 silencing associated to gained SEs
ABCD3	ATG101
ADGRV1	IFNE
AREG	ITGB4
ARHGAP12	KRT80
ARHGAP29	MTAP
ARRDC3	NANOS3
BTC	RECQL5
CCR7	SLC16A6
CPOX	WIPI1
CYP4F2	ZSWIM4
DCBLD2
DUSP5
ELF3
ENSG00000259753
EREG
ERRFI1
EZR
FAM84B
GPR15
GPR37L1
HMGA2
KIF5B
KLF14
LLPH
MKLN1
MSRB3
NPEPPS
OR10H1
PDP1
RPE65
RSPH3
S100A2
SCD
SLC45A1
SMNDC1
ST3GAL6
TMEM67
TNS4
TRIB1
WLS
WNT8B
