# Supplementary material for: Super-enhancers reorganization controls re-sensitization of oxaliplatin-resistant FBXW7-mutated colorectal cancer
Source: Research Square preprint supplement (doi:10.21203/rs.3.rs-4758082/v1), 2024-07-30
Supplement: Supplementary file 11 [file fd8d82bc72635a5f4cf55cf1.xlsx]

## Sheet: Foglio1
Primer_name	Sequence_5'->3'	Lenght	Tm
ADGRF3_RT_FW	GTGGAACCTGTATGAGGTGGT	21	59.8
ADGRF3_RT_RV	CCTGACTCGTTGAAGGAGGAAG	22	62.1
AREG_RT_FW	GAGCCGACTATGACTACTCAGA	22	60.2
AREG_RT_RV	TCACTTTCCGTCTTGTTTTGGG	22	58.4
ELF3_RT_FW	GGCCGATGACTTGGTACTGAC	21	61.8
ELF3_RT_RV	GCTTGCGTCGTACTTGTTCTTC	22	60.2
ERRFI1_RT_FW	CTGGAGCAGTCGCAGTGAG	19	61
ERRFI1_RT_RV	GCCATTCATCGGAGCAGATTTG	22	60.2
FBXW7_RT_FW	CGCGGCTCTTTTCTAAAAGTAATG	24	65.5
FBXW7_RT_RV	CAGAGAGCCTCCAGTTCGTC	20	64.2
GFP_RT_FW	GCA AGC TGA CCC TGA AGT TC	20	59.4
GFP_RT_RV	AAG TCG TGC TGC TTC ATG TG	20	57.3
GAPDH RT_FW	CCCTTCATTGACCTCAACTACATG	24	65.4
GAPDH RT_RV	TGGGATTTCCATTGATGACAAGC	23	68.8
HPRT_RT_FW	AGACTTTGCTTTCCTTGGTCAGG	23	66.5
HPRT_RT_RV	GTCTGGCTTATATCCAACACTTCG	24	64.5
MARCH5_RT_FW	GTCGGCTCTATCTATTGGACAGC	23	64.9
MARCH5_RT_RV	GCTCTCTCCATAACATCCAGACC	23	64.9
MARCH6_RT_FW	GACTGGTTACAAGTATTGGCACT	23	60.9
MARCH6_RT_RV	CCGTTGACAGCATATCTAATGGC	23	66.3
RNF185_RT_FW	GCCGTGTTTACATCAGTGGT	20	62.5
RNF185_RT_RV	GAGGGGGATGACCTTGTCTC	20	64.8
TMEM74_RT_FW	AGCTCCACTACCTTGCTAAGA	21	57.9
TMEM74_RT_RV	GACCCTTCCATCTCGGTTGC	20	61.4
ICAM1_RT_FW	ATGCCCAGACATCTGTGTCC	20	61.6
ICAM1_RT_RV	GGGGTCTCTATGCCCAACAA	20	61.3
